# Supplementary material
Source: PubMed Central journal article supplement (PMC5663351)
Supplement: jci-127-92893-s001.pdf [file jci-127-92893-s001.pdf]

# Supplementary Figure S1

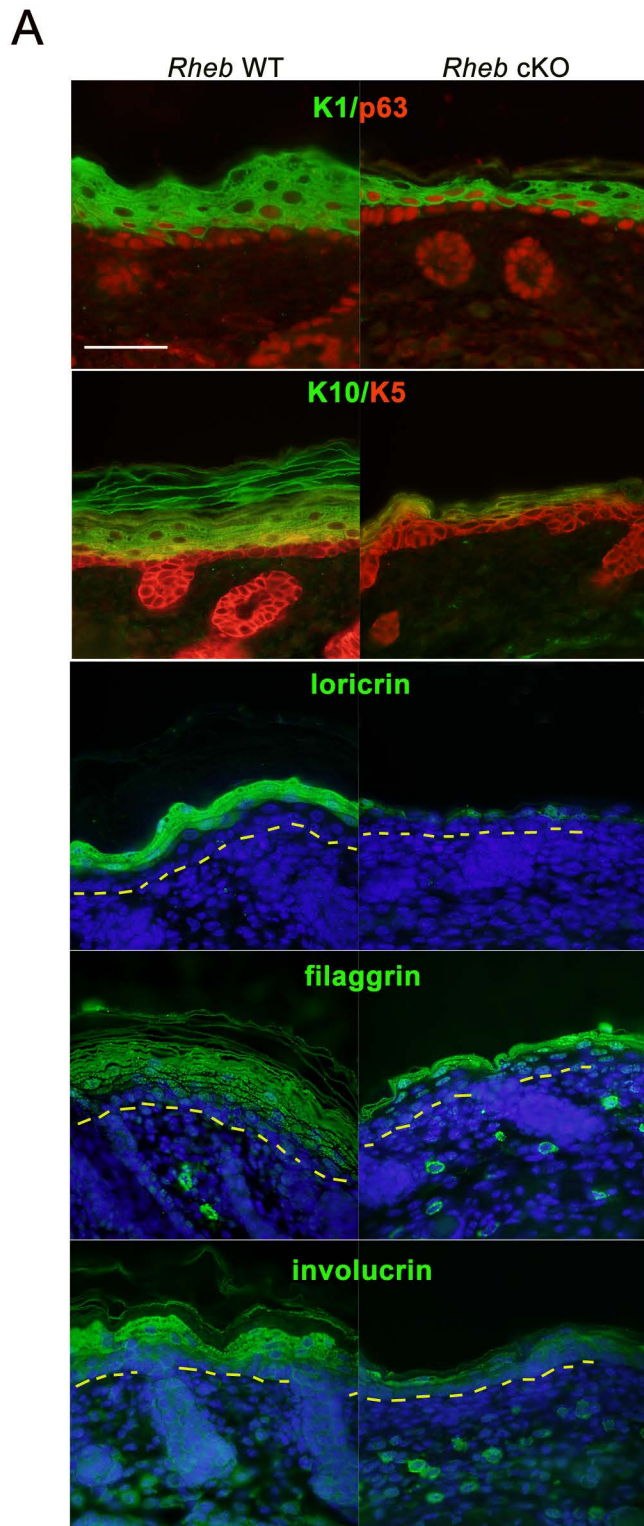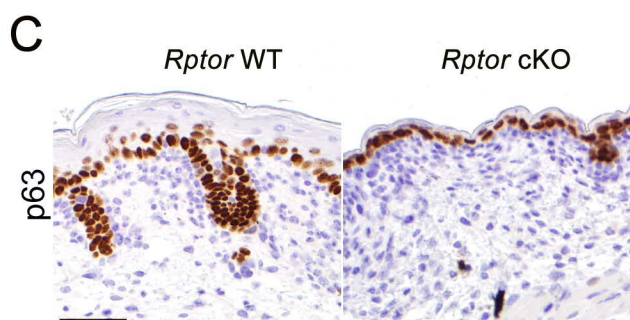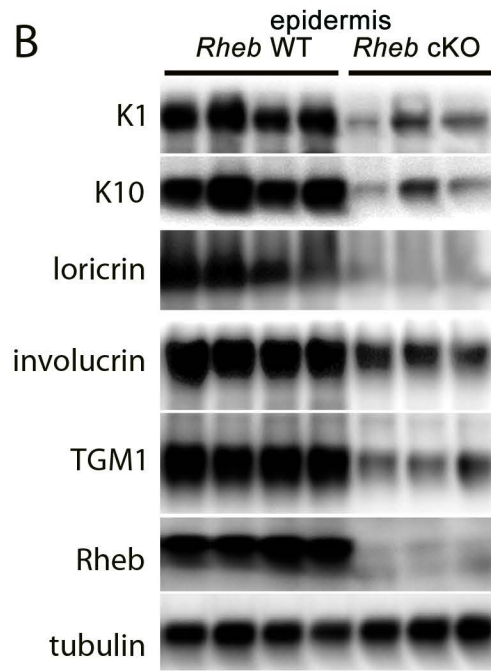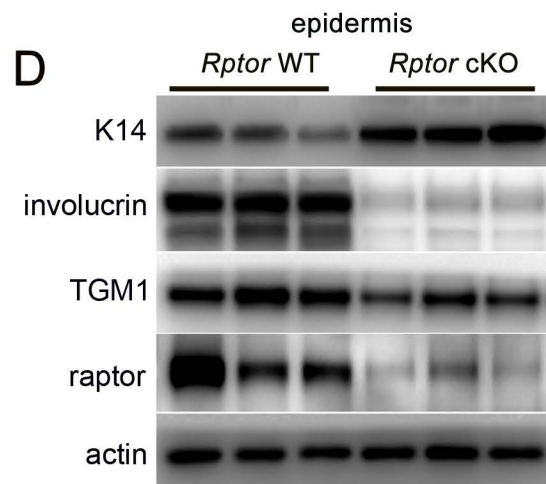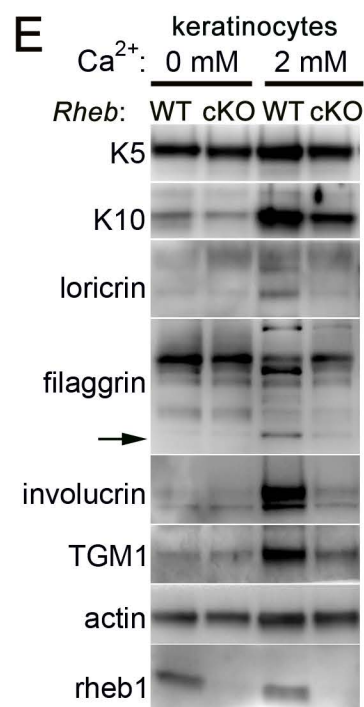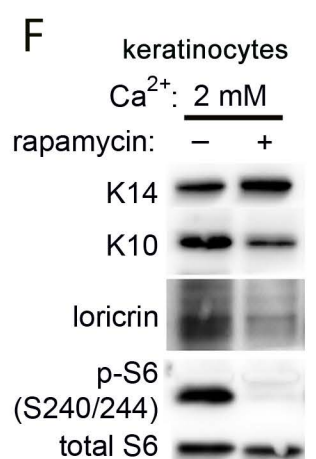

**Supplementary Figure S1: Epidermal-specific mTORC1 loss-of-function models show impaired epidermal differentiation.** (A) *Rheb* cKO P0 epidermis fails to express spinous (Keratin 1, 10) and granular layer (loricrin, filaggrin, involucrin) differentiation markers by immunofluorescence, while the basal layer is maintained or even slightly thicker than WT (p63 and Keratin 5). Scale bar= 30  $\mu$ m. (B) *Rheb* cKO P0 epidermal protein lysates subjected to immunoblotting confirm downregulation of K1, K10, loricrin, involucrin and transglutaminase (TGM1) 1 expression compared to WT. (C) *Rptor* cKO P0 epidermis shows a similar but more severe phenotype compared to *Rheb* cKO, with near complete loss of suprabasal keratinocyte layers in the epidermis as demonstrated by basal marker p63 immunostaining. Scale bar= 30  $\mu$ m. (D) Immunoblotting of *Rptor* cKO vs WT P0 epidermal protein lysates confirms relative downregulation of granular markers involucrin and TGM1 with slight up-regulation of basal marker keratin 14 (K14). (E) Calcium-induced differentiation is impaired in *Rheb* cKO cells subjected to calcium switch assay (transfer from 0.05 mM to 2 mM calcium concentration media). While WT cells up-regulate differentiation markers (K10, loricrin, filaggrin, involucrin and TGM1) in response to exposure to 2 mM calcium for 24 hours, cKO keratinocytes show an impaired response. Basal markers (K5) are unchanged in response to calcium. (F) mTORC1 inhibition by rapamycin (200 nM) in WT keratinocytes impairs expression of spinous (K10) and granular (loricrin) differentiation markers in 2 mM calcium. Phosphorylated S6 protein (p-S6) is markedly diminished by rapamycin, confirming mTORC1 inhibition.

# Supplementary Figure S2

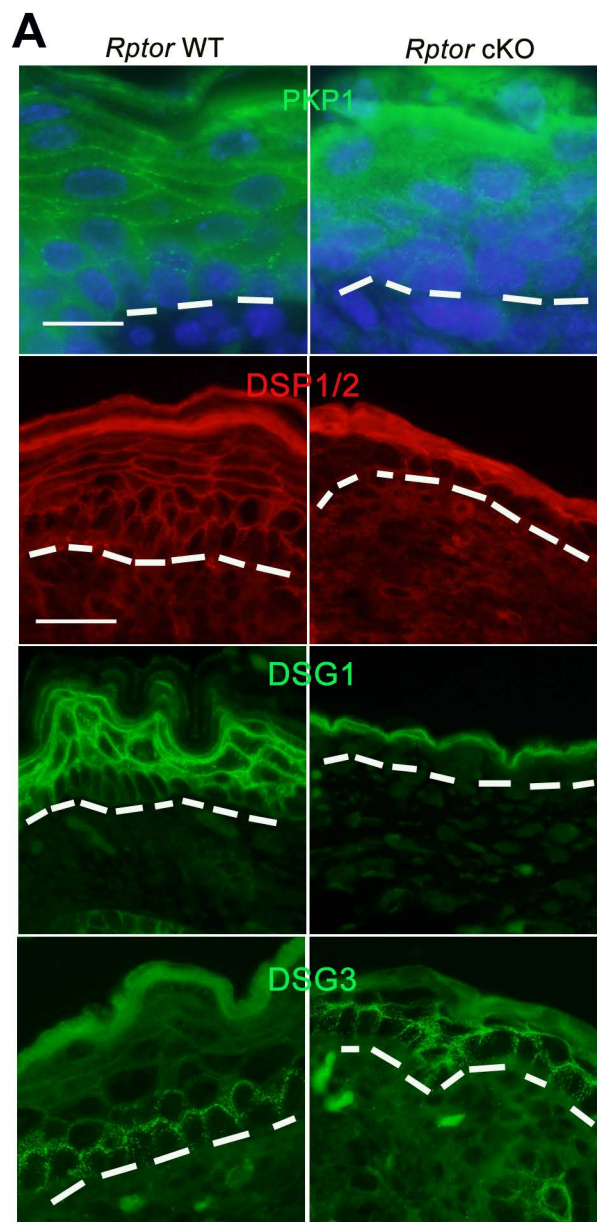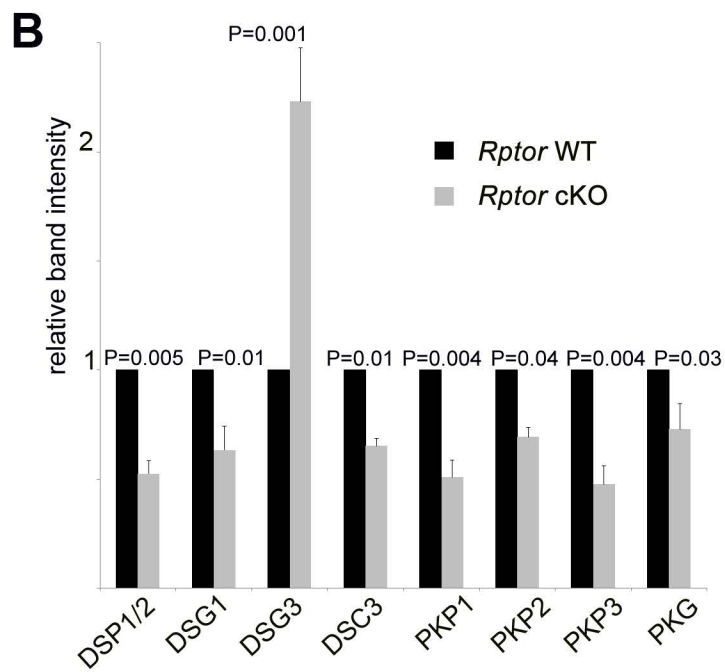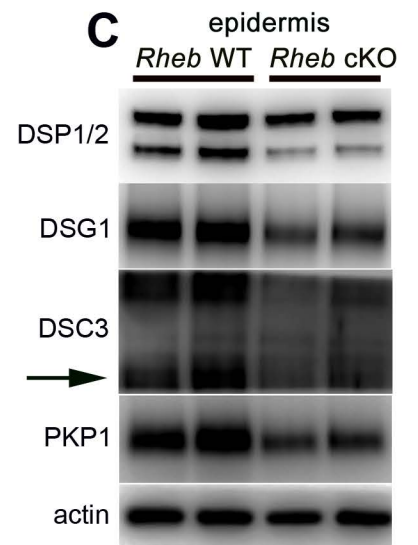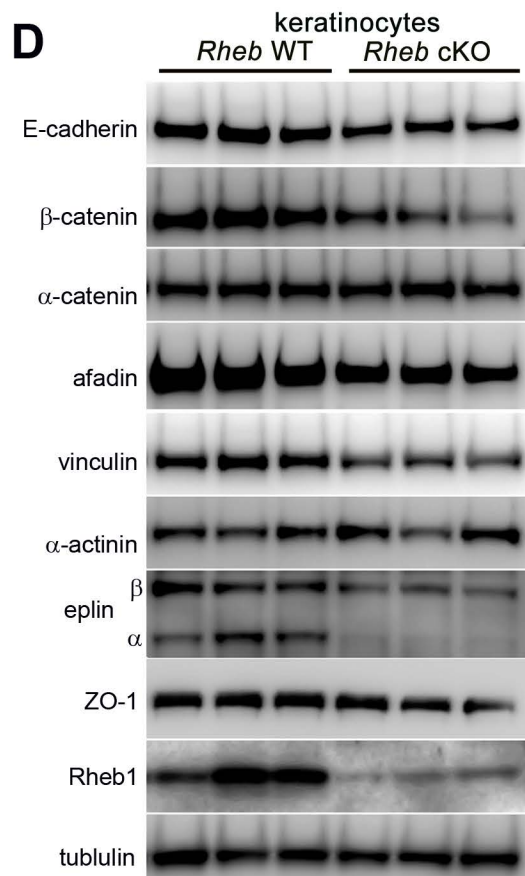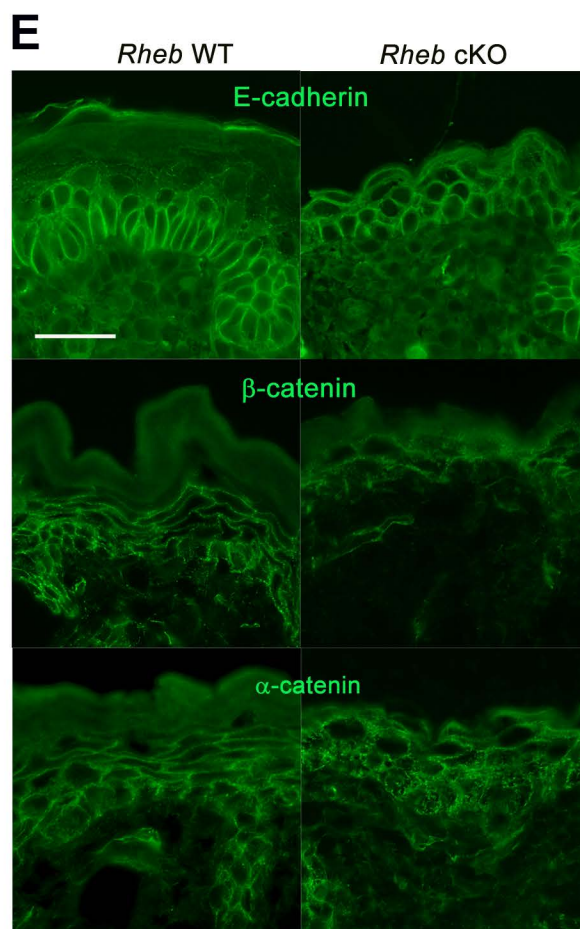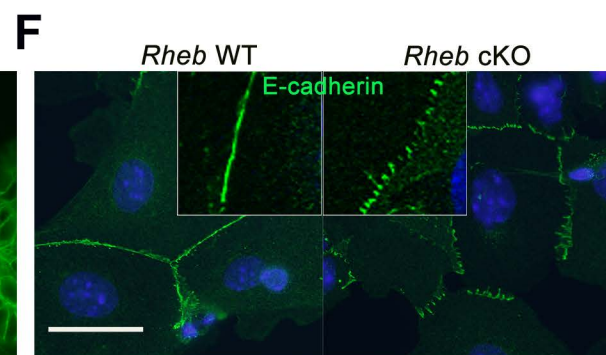

**Supplementary Figure S2: mTORC1 loss-of-function is associated with decreased desmosomal, but not adherens, junctions.** **(A)** Decreased expression of PKP1 (punctate dots), DSP1/2, DSG1 and DSG3 in *Rptor* cKO compared to WT P0 epidermis by immunofluorescence. Scale bar= 60  $\mu$ m. **(B)** Densitometry quantification of immunoblot analysis shown in main Figure 3G (n=3; error bars represent SEM; p values indicated are by Student's T-test). **(C)** *Rheb* cKO P0 epidermal protein lysates subjected to immunoblotting confirm lower total levels of desmosomal proteins (DSP1/2, DSG1, DSC3 and PKP1). **(D)** *Rheb* cKO P0 cultured keratinocytes show normal protein expression of adherens junction components (E-cadherin,  $\beta$ -catenin,  $\alpha$ -catenin), as well as adherens junctions components (afadin) and tight junction components (ZO-1) by immunoblotting. Some actin-binding proteins such as vinculin, afadin and EPLIN show decreased levels in cKO epidermis as well. **(E)** *Rheb* cKO P0 epidermis shows normal expression of adherens junction proteins by immunofluorescence. Scale bar = 30  $\mu$ m. **(E)** *Rheb* cKO keratinocytes have normal membranous levels of E-cadherin, however the distribution of staining demonstrates immature adhesion zippers rather than mature adhesion bands by immunofluorescence. Scale bar = 50  $\mu$ m.

# Supplementary Figure S3

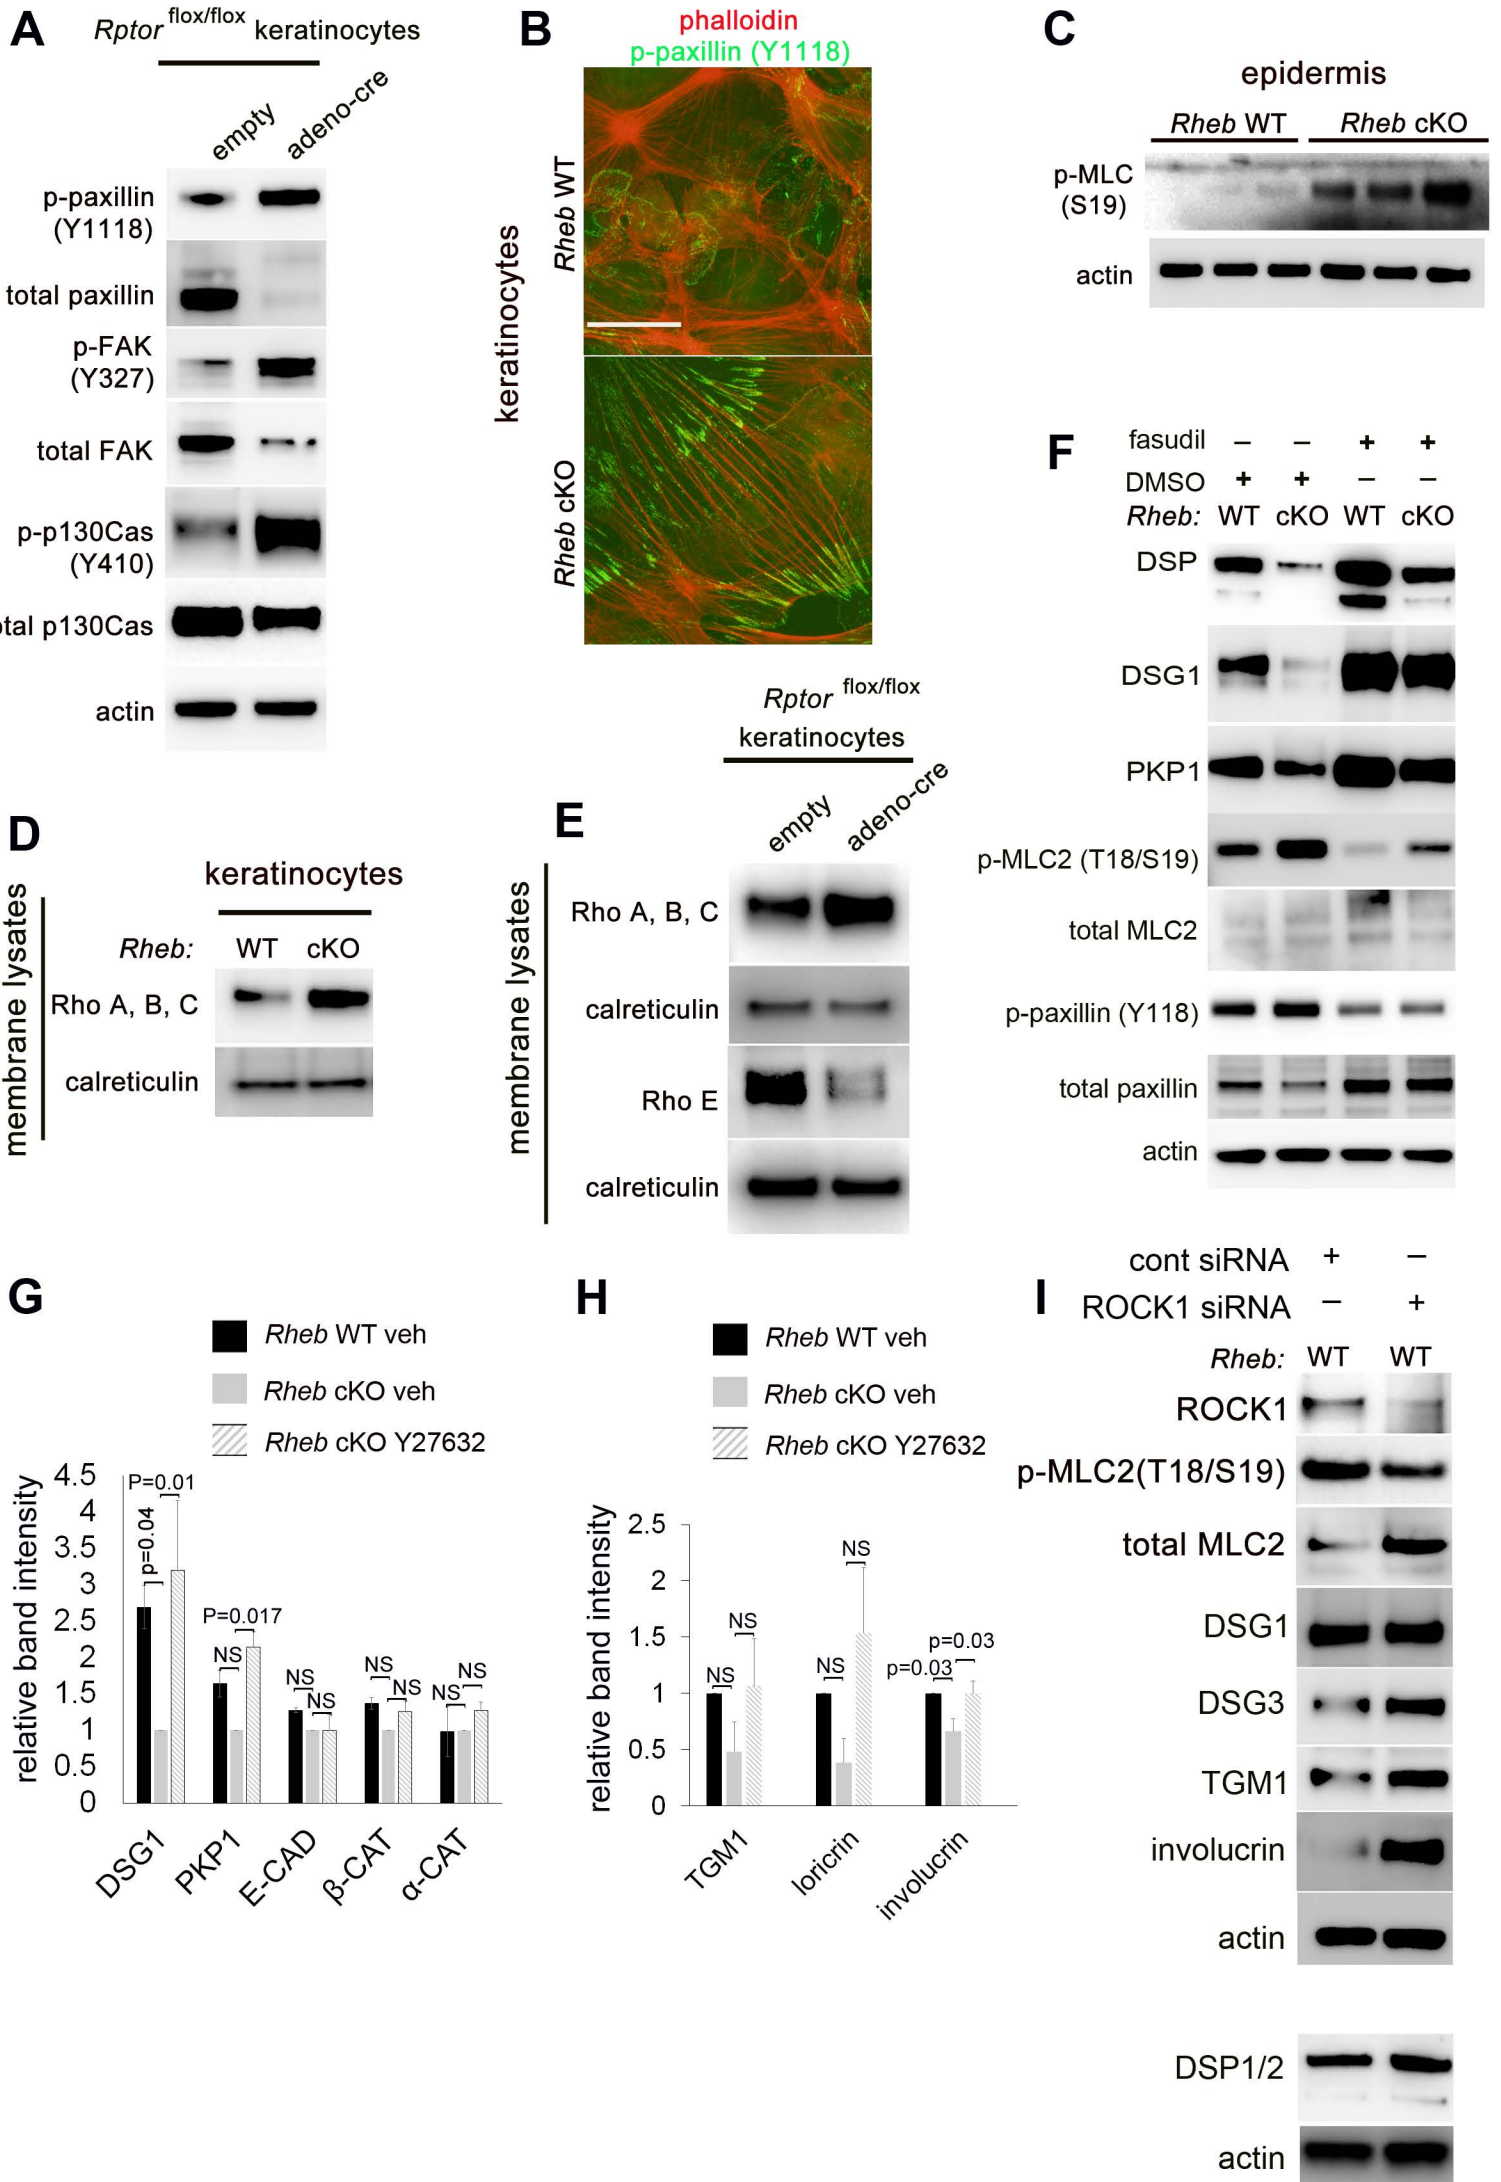

**Supplementary Figure S3: mTORC1 loss-of-function is associated with increased Rho kinase activity and focal adhesion formation.** **(A)** Increased biochemical evidence of focal adhesion formation in inducible *Rptor* KO keratinocytes, including increased phosphorylated paxillin (p-paxillin), focal adhesion kinase (p-FAK) and p130Cas (p-p130Cas), following calcium switch. **(B)** Immunofluorescence for p-paxillin and phalloidin staining for f-actin demonstrates relatively rare focal adhesions in WT cells compared to *Rheb* cKO cells where focal adhesion and actin stress fiber formation is abundant. Scale bar = 30  $\mu$ m. **(C)** Increased phosphorylated myosin light chain (p-MLC2) in *Rheb* cKO P0 epidermal lysates by immunoblotting compared to WT control. **(D), (E)** Lysates enriched for membrane proteins from *Rheb* cKO and *Rptor* inducible KO cultured keratinocytes demonstrate increased Rho A/B/C protein at the membrane in cells with mTORC1 loss-of-function compared to WT cells, consistent with increased Rho activity. Levels of ROCK inhibitor Rho E, by contrast, are decreased in membrane lysates from *Rptor* KO keratinocytes. Rho A/B/C and calreticulin in **(D)** were immunoblotted in parallel, contemporaneously. **(F)** Immunoblotting for desmosomal components (DSP1/2, DSG1, PKP1) in WT and *Rheb* cKO cells demonstrates rescue of total levels of desmosomal proteins with ROCK inhibition using fasudil (50  $\mu$ M). ROCK activity suppression is documented by decreased p-MLC2 levels. Focal adhesion marker protein p-paxillin is also upregulated in *Rheb* cKO keratinocytes and is sensitive to ROCK inhibition. DSP, PKP1 and total MLC2 were immunoblotted in parallel, contemporaneously with the other markers. **(G)** Densitometry quantification of immunoblot experiments from **Figure 6C** ( $r=3$ ; p-values by one-way ANOVA). **(H)** Densitometry quantification of immunoblot experiments from **Figure 6E** ( $r=3$ ; p-values by one-way ANOVA). **(I)** . Immunoblotting of *Rheb* WT cells treated with ROCK1 siRNA (50nm) for ROCK1 and markers of ROCK activity, desmosomal and biochemical differentiation markers. DSP (lower panel) was immunoblotted separately from the upper panel using the same biological replicate. Error bars represent SEM throughout.

# Supplementary Figure S4

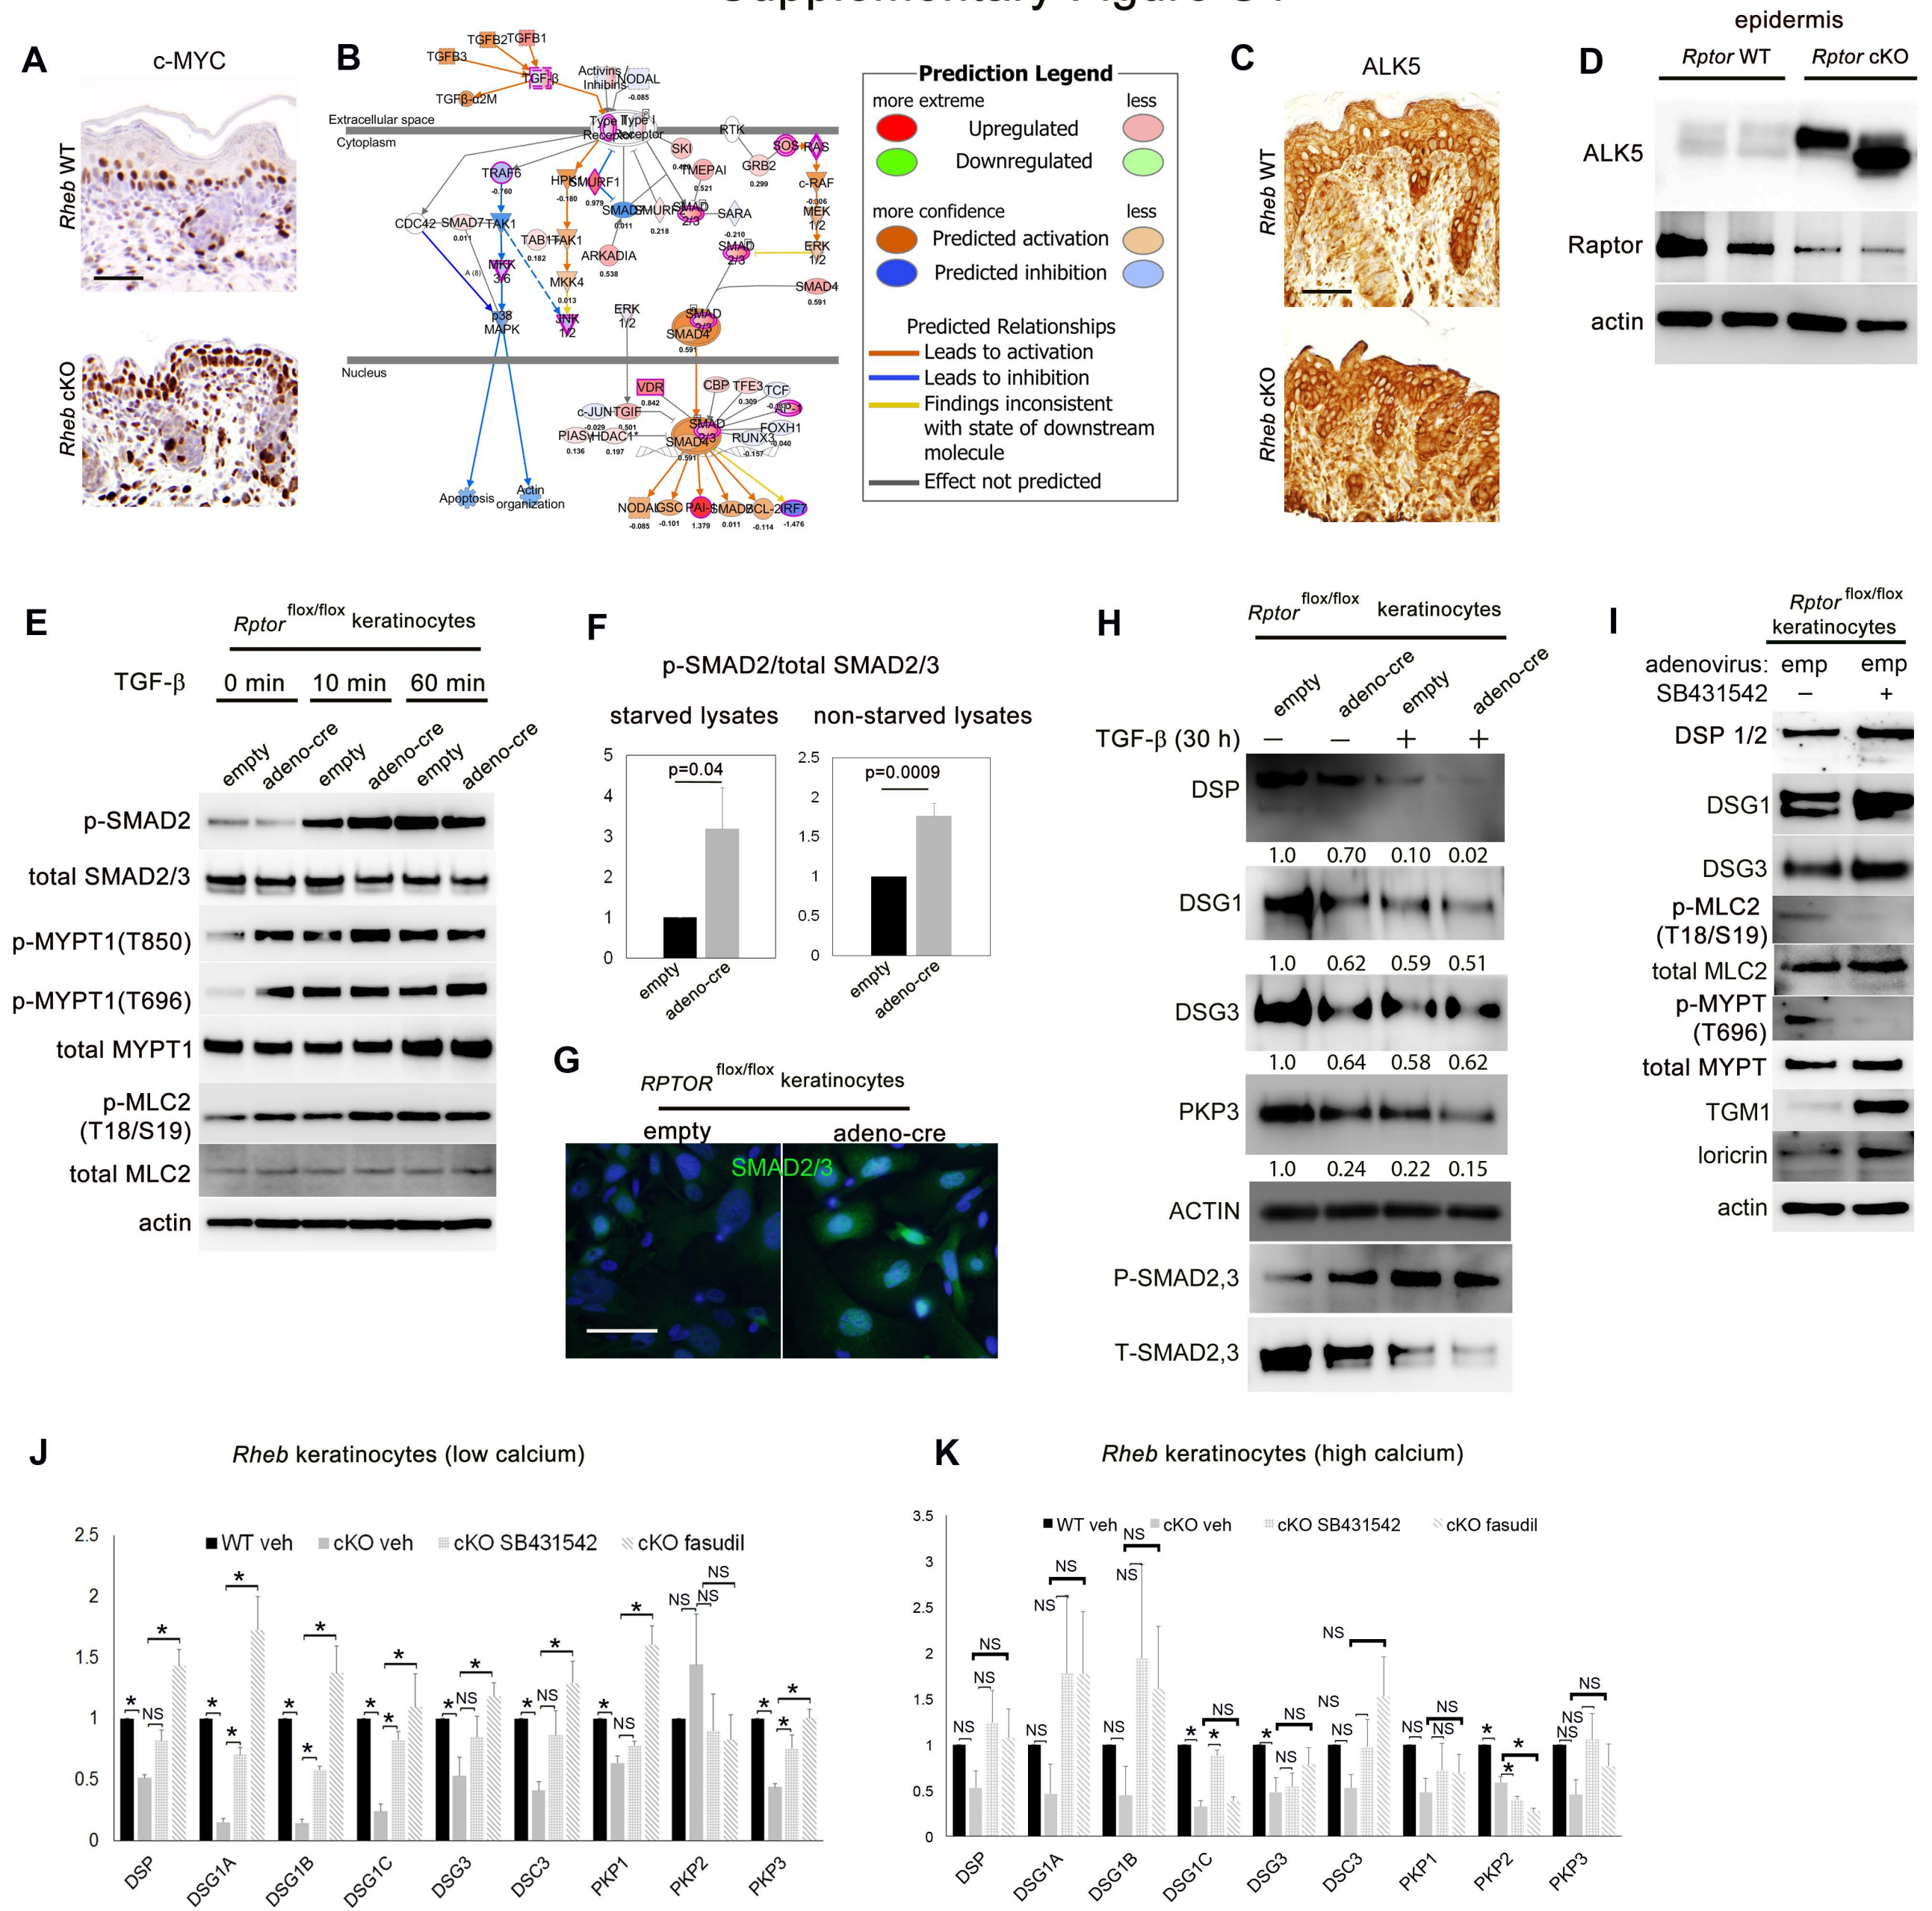

**Supplementary Figure S4: ALK5 levels and TGF- $\beta$  signaling are increased following mTORC1 loss-of-function and TGF- $\beta$  signaling is necessary and sufficient to decrease desmosome levels in keratinocytes.** **(A)** Immunohistochemistry for c-MYC shows more diffuse expression in *Rheb* cKO epidermis compared to WT where it is expressed predominantly in basal cells (scale bar=30  $\mu$ m). **(B)** Ingenuity Pathway Analysis of the TGF- $\beta$  signaling pathway from differential gene expression analysis of *Rheb* WT vs. cKO E18.5 epidermis. Genes within our data set whose expression showed greater than 2SD differential fold change are outlined in magenta and depicted in red (signifying up-regulation) or blue (signifying down-regulation). **(C)** Membranous ALK5 (TGF- $\beta$  receptor I) levels are increased in *Rheb* cKO P0 epidermis compared to WT controls by immunohistochemistry (scale bar=30  $\mu$ m). **(D)** ALK5 levels are increased by immunoblotting in *Rptor* cKO P0 epidermis compared to WT control. **(E)** Short-term treatment of *Rptor*<sup>fllox/fllox</sup> keratinocyte cultures treated with empty adenovirus or adenoviral-cre demonstrates increased TGF- $\beta$  signaling (increased p-SMAD2 levels) and increased ROCK activation by immunoblotting (increased levels of p-MYPT1 and p-MLC2) in cells with mTORC1 inactivation with TGF- $\beta$  treatment. ROCK activation is also increased in WT cells in response to TGF- $\beta$ . **(F)** Densitometry analysis of phospho/total SMAD2, 3 expression in western blots from starved and non-starved *Rptor*<sup>fllox/fllox</sup> and inducible *Rptor* cKO keratinocytes demonstrates significant up-regulation in *Rptor* cKO keratinocytes ( $r=4$ ; error bars represent SEM; p values indicated are by Student's T-test). **(G)** Immunofluorescence for SMAD2, 3 demonstrates increased nuclear localization in *Rptor*<sup>fllox/fllox</sup> keratinocyte cultures treated with adenoviral-cre (scale bar=50  $\mu$ m). **(H)** Long term (30 h) TGF- $\beta$  treatment of *Rptor*<sup>fllox/fllox</sup> keratinocyte cultures treated with empty adenovirus or adenoviral-cre increases p-SMAD2, 3 levels and suppresses DSP1/2, DSG1, DSG3 and PKP3 levels by immunoblotting. **(I)** By immunoblotting, basal p-MLC2 and p-MYPT1 levels are decreased, and desmosome proteins (DSP1/2, DSG1, DSG3) and differentiation markers (TGM1, loricrin) are increased in *Rptor*<sup>fllox/fllox</sup> keratinocyte cultures with empty vector, treated with ALK5 inhibitor SB431542. *Rheb* cKO keratinocytes show uniform down-regulation of desmosomal mRNA levels under low calcium **(J)** conditions as well as high calcium **(K)** conditions. ROCK inhibition with fasudil or ALK5 inhibition with SB431542 is sufficient to rescue desmosomal mRNA levels to WT levels for most of the desmosomal transcripts ( $r=3$ ; error bars represent SEM; \* indicates  $p < 0.05$  by one-way ANOVA).



# Supplementary Figure S5

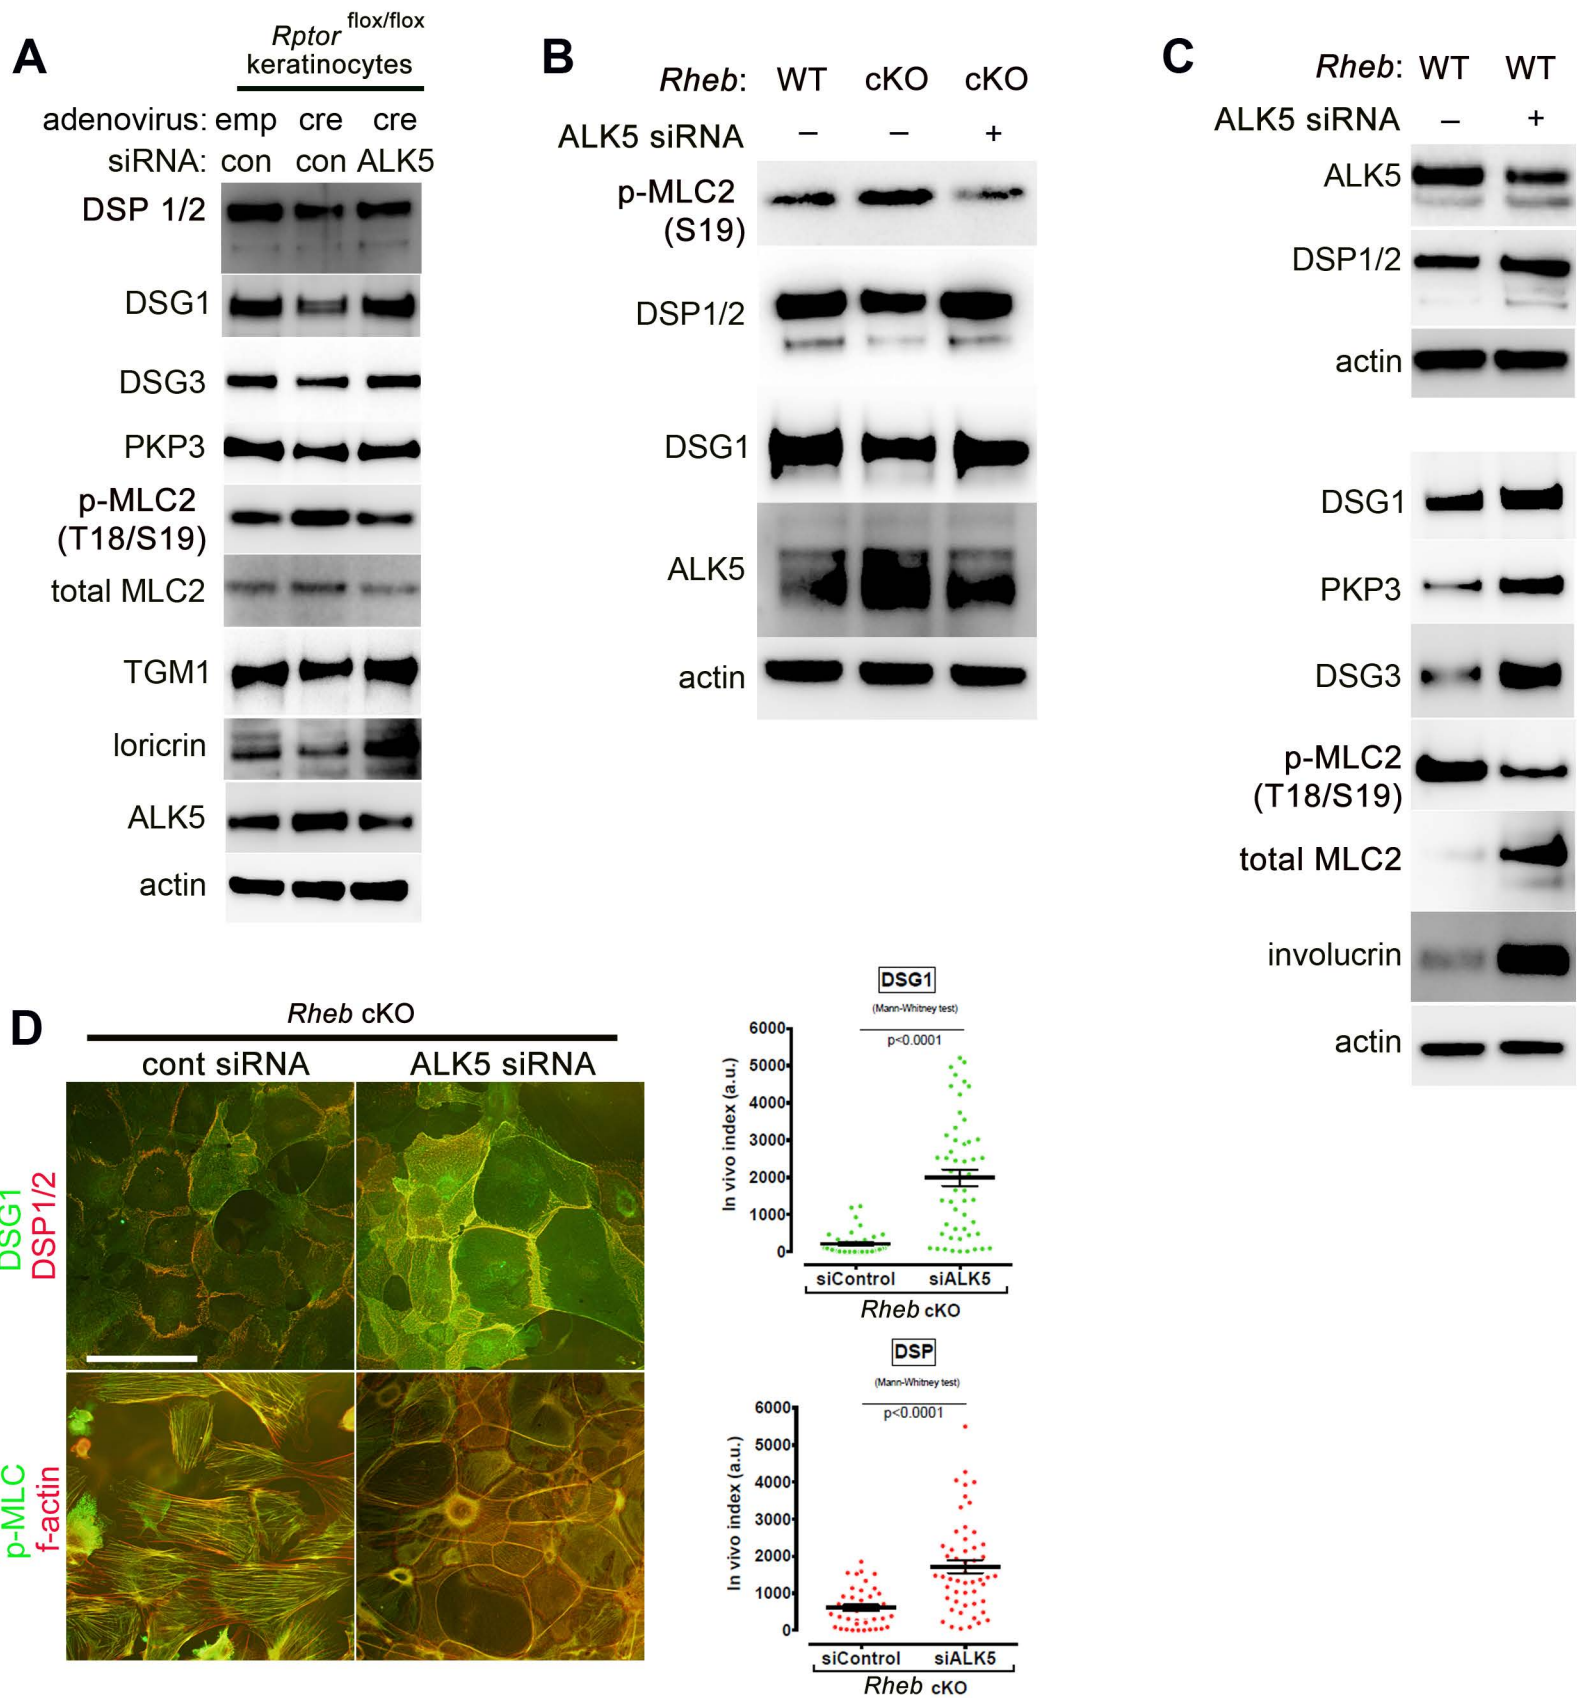

**Supplementary Figure S5: siRNA mediated depletion of ALK5 is sufficient to inhibit ROCK signaling and rescue desmosome levels in keratinocytes with mTORC1 loss-of-function. (A)**

Treatment of Inducible *Rptor* cKO keratinocytes with ALK5 siRNA partially suppresses p-MLC2 and ALK5 levels and rescues expression of desmosomal proteins (DSP, DSG1, DSG3, PKP3) and markers of biochemical differentiation (TGM1, loricrin) by immunoblotting. **(B)** Treatment of *Rheb* cKO keratinocytes with ALK5 siRNA partially suppresses p-MLC2 and ALK5 levels and rescues desmosomal protein expression by immunoblotting. **(C)** Treatment of *Rheb* WT keratinocytes with ALK5 siRNA partially suppresses p-MLC2 and ALK5 levels and rescues expression of desmosomal proteins (DSP, DSG1, DSG3, PKP3) and markers of biochemical differentiation (involucrin) by immunoblotting. DSP and ALK5 were immunoblotted separately using the same biological replicate. **(D)** Treatment of *Rheb* cKO keratinocytes with ALK5 siRNA increases membranous desmosomal protein levels (DSP1/2 and DSG1) and cortical f-actin (by phalloidin staining) and p-MLC2 levels by immunofluorescence (left panels) (scale bar=100  $\mu$ m). Quantification of DSP and DSG1 border fluorescence (right panels) from representative images ( $n>28$  cells,  $r=3$ ;  $p<0.001$  by Mann-Whitney test).

# Supplementary Figure S6

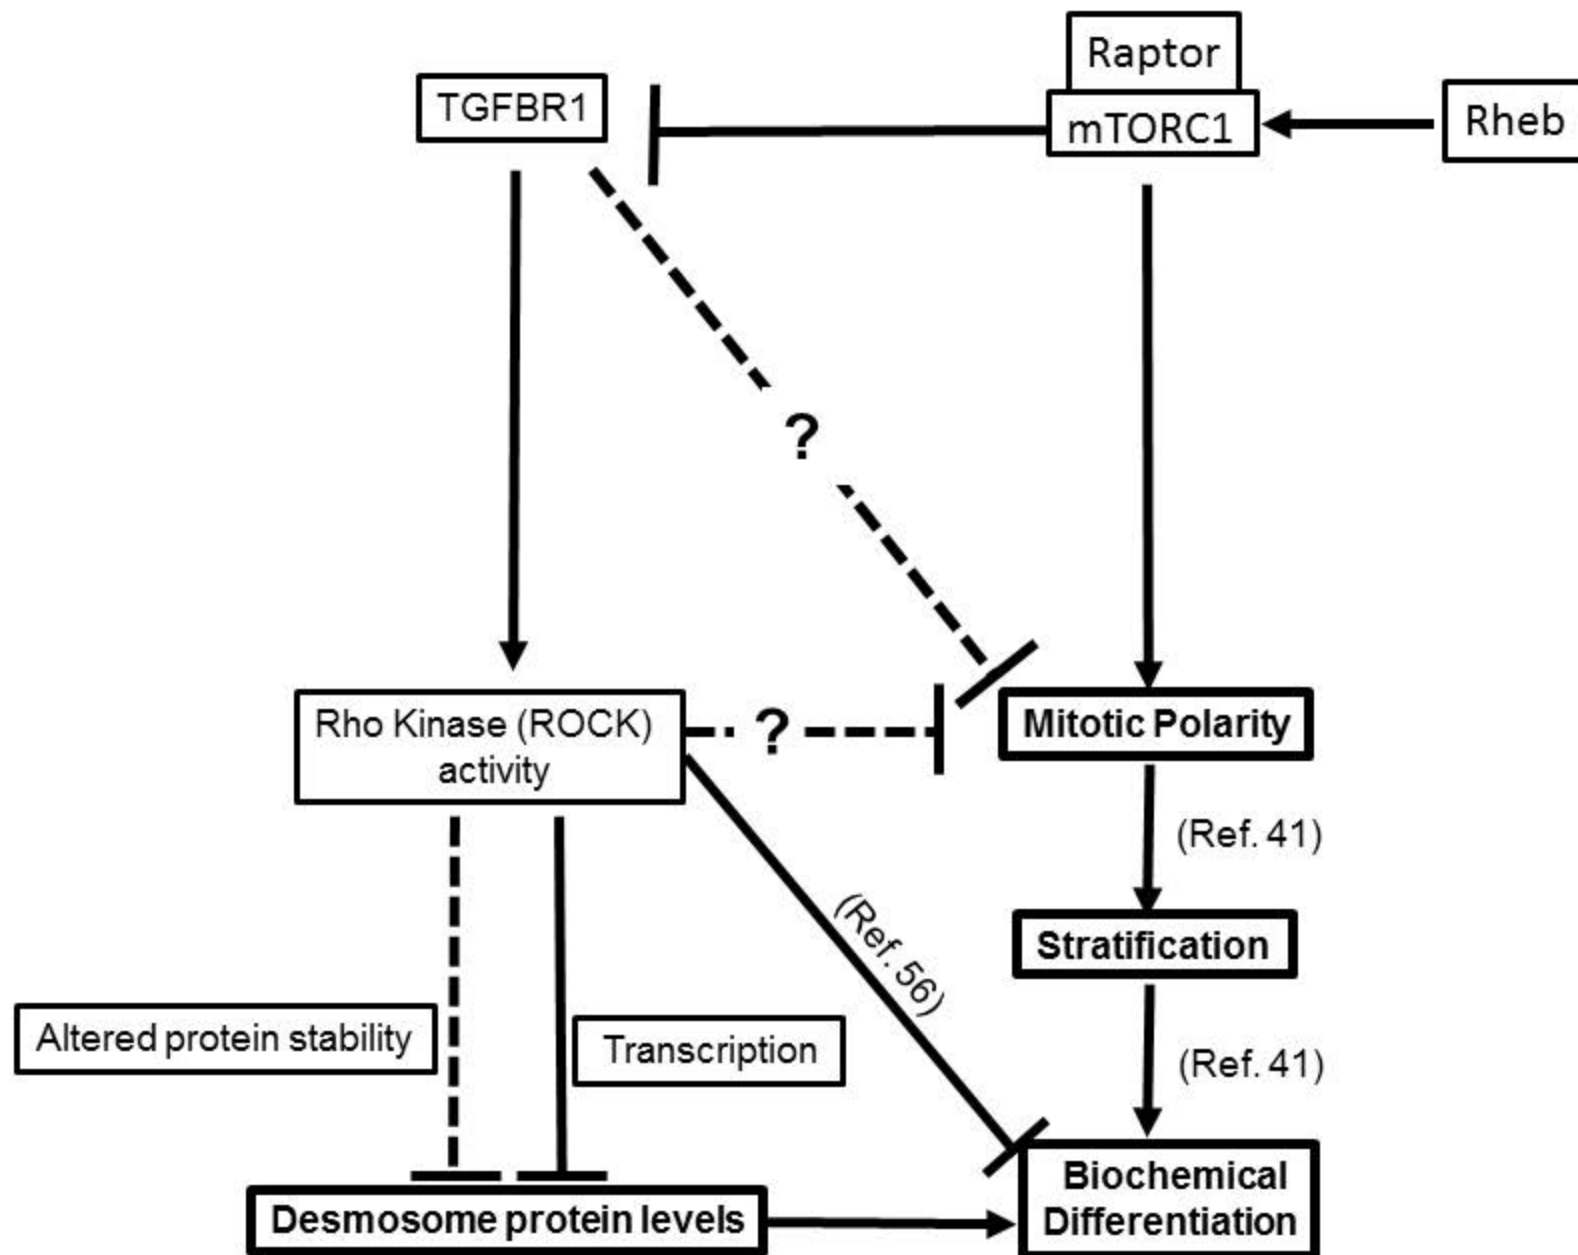

**Supplementary Figure S6: Tentative model outlining the downstream sequelae of mTORC1 loss-of-function in the epidermis.** Solid lines represent pathways substantiated in this manuscript, or by previous studies (references 41,56). Dashed lines represent potential uncharacterized consequences of mTORC1 inhibition that are the subject of future study.

## **Methods:**

### **Mice genotyping:**

- Wild-type and floxed *Rptor*: 5'-CTC AGT AGT GGT ATG TGC TCA G-3' (forward)  
5'-GGG TAC AGT ATG TCA GCA CAG-3' (reverse)
- Wild-type and floxed *Rheb*: 5'-GCC CAG AAC ATC TGT TCC AT-3' (forward)  
5'-GGT ACC CAC AAC CTG ACA CC-3' (reverse)
- Recombined *Rheb*: 5'-ATA GCT GGA GCC ACC AAC AC-3' (forward)  
5'-GCC TCA GCT TCT CAA GCA AC-3' (reverse)
- KRT14-cre: 5'- TTC CTC AGG AGT GTC TTC GC-3' (transgene)  
5'-GTC CAT GTC CTT CCT GA GC-3' (transgene)  
5'-CAA ATG TTG CTT GTC TGG TG-3' (internal positive control forward)  
5'-GTC AGT CGA GTG CAC AGT TT-3' (internal positive control reverse)

### **Barrier function assay:**

Embryos were euthanized, washed in ice-cold PBS, passaged through a gradient of ice-cold methanol and stained in 0.1% toluidine blue solution in water for 1-2 min on ice. After de-staining in PBS, embryos were photographed using a Motic SMZ 168 stereomicroscope (Motic Optics; Richmond, British Columbia) equipped with a Moticam 2300, 3.0 Megapixel digital color camera.

**Primary mouse keratinocyte cultures:** Newborn pups were decapitated, immersed in 7.5% povidone-iodine for 5 minutes and rinsed in 70% ethanol for 2 minutes. The trunk skin was removed and placed dermis-side down in a Petri dish containing 0.25% trypsin-EDTA (Invitrogen), overnight at 4 °C for 18h. The dermis was separated from the epidermis and keratinocytes isolated by scraping the basal surface of the epidermis. Keratinocyte cell suspensions were passed through a 100 micron cell strainer, centrifugated twice and plated on Petri dishes coated with fibronectin (F1141; Sigma), in calcium-free EMEM (BW06-174G; Lonza) supplemented with 10% chelated FBS (100-106; Gemini), 0.2 mM calcium (Lonza), 10 ng/ml epidermal growth factor (EGF)(Peprotech) and antibiotics. Chelation of Fetal Bovine Serum was carried out using

Chelex (100 resin, sodium, 200–400 dry mesh, 75–150 mm wet bead) (Bio-Rad) according to described protocols. The following day, media was replaced by EMEM containing 10% chelated FBS, EGF, 0.05 mM calcium and antibiotics.

**Reagents and antibodies: Primary antibodies** used were: Rheb (09-247, Millipore), 1:1000; Phospho-S6 Ribosomal Protein (Ser240/244) (5364, Cell Signaling), 1:800-1:1000; S6 Ribosomal Protein (2317, Cell Signaling), 1:1000;  $\beta$ -Actin (3700, Cell Signaling), 1:1000; Raptor (2280, Cell Signaling), 1:1000; Phospho-mTOR (S2448) (5536, Cell Signaling), 1:50; Phospho-4E-BP1 (Thr37/46) (2855, Cell Signaling), 1:1000; Phospho-Akt (S473) (4060, Cell Signaling), 1:1000; Phospho-Akt (T308) (5106, Cell Signaling), 1:500; Akt (pan) (4691, Cell Signaling), 1:1000; Phospho-FoxO1 (Thr24)/FoxO3a (Thr32)/FoxO4 (Thr28) (2599, Cell Signaling), 1:1000; FoxO1 (2880, Cell Signaling), 1:1000; Phospho-GSK-3 $\beta$  (Ser9) (9323, Cell Signaling), 1:1000; GSK-3 $\beta$  (sc-53931, Santa Cruz), 1:500; p63 (sc-8431, Santa Cruz), 1:50; Ki-67 (12202, Cell Signaling), 1:400; Phospho-Histone H3 (Ser10) (06-570, Millipore), 1:500-1:1000; Cleaved Caspase-3 (Asp175) (9664, Cell Signaling), 1:100;  $\gamma$ -tubulin (T-6557, Sigma-Aldrich), 1:5000; Acetyl- $\alpha$ -Tubulin (Lys40) (5335, Cell Signaling), 1:800; Survivin (2808, Cell Signaling), 1:400; Keratin1 (ab24643, Abcam), 1:1000; Keratin10 (PRB-159P, Covance), 1:1000; Keratin5 (PRB-160P, Covance), 1:1000; Keratin14 (CBL197, Millipore), 1:1000; Involucrin (PRB-140C, Covance), 1:1000; Loricrin (PRB-145P, Covance), 1:1000; Filaggrin (PRB-417P, Covance), 1:1000; TGM1 (ab103814, Abcam), 1:1000;  $\beta$ -Tubulin (2128, Cell signaling), 1:1000; DSP (10R-D108A, Fitzgerald), 1:500; DSG1 (sc-20114, Santa Cruz), 1:500; DSG3 (D218-3, MBL), 1:1000; DSC3 (sc-48750, Santa Cruz), 1:500; PKP1 (ab183512, Abcam), 1:1000; PKP2 (ab151402, Abcam), 1:1000; PKP3 (MA5-18080, ThermoFisher Scientific), 1:1000; E-Cadherin (3195, Cell Signaling); 1:1000; Pan-Cadherin (4068, Cell Signaling), 1:1000;  $\beta$ -Catenin (8480, Cell Signaling), 1:1000;  $\alpha$ -E-Catenin Antibody (3236, Cell Signaling), 1:1000;  $\gamma$ -Catenin Antibody (2309, Cell Signaling) 1:1000; Vinculin (4650, Cell Signaling), 1:1000; Vinculin (V9264, Sigma-Aldrich), 1:50;  $\alpha$ -Actinin (6487, Cell Signaling), 1:1000; EPLIN (sc-136399, Santa Cruz), 1:500; Afadin (13531, Cell Signaling), 1:1000; ZO-1 (13663, Cell

Signaling), 1:1000; Phospho-Myosin Light Chain 2 (Thr18/Ser19) (3674, Cell Signaling), 1:1000; Phospho-Myosin Light Chain 2 (Ser19) (3675, Cell Signaling), 1:1000; Myosin Light Chain 2 (8505, Cell Signaling), 1:500; Phospho-MYPT1 (Thr696) (5163, Cell Signaling), 1:1000; Phospho-MYPT1 (Thr853) (4563, Cell Signaling), 1:1000; MYPT1 (2634, Cell Signaling), 1:1000; Phospho-Paxillin (Tyr118) (2541, Cell Signaling), 1:50-1:1000; Paxillin (2542, Cell Signaling), 1:1000; Phospho-FAK (Tyr397) (3283, Cell Signaling), 1:1000; Fak (3285, Cell Signaling), 1:1000; Phospho-p130 Cas (Tyr410) (4011, Cell Signaling), 1:1000; p130 Cas (13846, Cell Signaling), 1:1000; ROCK1 (4035, Cell Signaling), 1:1000; ROCK2 (8236, Cell Signaling), 1:1000; RhoA (2117, Cell Signaling), 1:1000; RhoB (2098, Cell Signaling), 1:1000; Rho (A,B,C) (05-778, Millipore), 1:1000; RhoE/Rnd3 (05-723, Millipore), 1:1000; Calreticulin (12238, Cell Signaling), 1:1000; Na,K-ATPase (3010, Cell Signaling), 1:1000; ALK5 (ab31013, Abcam), 1:50-1:500; Smad2 (51-1300, ThermoFisher Scientific), 1:100; Smad3 (51-1500, ThermoFisher Scientific), 1:100; Phospho-Smad2 (Ser465/467) (3108, Cell Signaling), 1:1000; Phospho-Smad2 (Ser465/467)/Smad3 (Ser423/425), 1:1000; Smad2/3 (8685, Cell Signaling), 1:1000; Vimentin (5741, Cell Signaling), 1:1000.

**Histology and immunostaining:** Sections were deparaffinized in xylene (Sigma-Aldrich), hydrated in graded ethanol and rinsed in distilled water. Antigen retrieval was performed using citrate (10 mM, pH 6.0) or EDTA + 0.01% TWEEN 20 (1 mM, pH 8.0) buffers and HIER (heat-induced epitope retrieval) method, in accordance with the protocol specified for each antibody. All washing steps were done using 1X TBS-T buffer. Endogenous peroxidase activity was quenched by incubation with Dual Enzyme Block (Dako, Agilent Technologies) for 10 minutes at room temperature. Sections were incubated with each antibody overnight at 4°C diluted in antibody dilution buffer (Roche/Ventana Medical Systems). For immunohistochemistry, a horseradish peroxidase-labeled polymer, Poly-HRP PowerVision Detection System (Novocastra/Leica Biosystems) was applied for 30 minutes at room temperature. Signal detection was performed using 3,3'-diaminobenzidine tetrahydrochloride (DAB) (Sigma-Aldrich) for 20 minutes at room temperature. Slides were counterstained for 30 seconds with Mayer's hematoxylin (Dako, Agilent Technologies), dehydrated, and mounted. For

immunofluorescence, after primary antibody overnight reaction at 4°C, sections were incubated with secondary antibodies (Alexafluor-488 or Alexafluor-594 conjugated, anti-Rabbit or anti-Mouse IgG, Thermo Fisher Scientific) at a dilution of 1:200 for 1h 30min at room temperature. Subsequently they were washed 2x/5min in PBS, rinsed in distilled water, dehydrated in graded ethanol and mounted with ProLong Gold Antifade with DAPI (Thermo Fisher Scientific).

**Protein lysate preparation and immunoblotting:** Once dissociated, the epidermal sheet was homogenized using gentleMACS M tubes in the gentleMACS dissociator (Miltenyi Biotec). Tissues or cells were homogenized and lysed in ice-cold Urea lysis buffer (8M Urea, 60mM Tris pH 6.8, 1 % SDS [w/v],) supplemented with NaVO<sub>4</sub> (1 mM), NaF (1 mM) and 10 µl Halt Protease and Phosphatase Inhibitor Cocktail (78440, Thermo Fisher Scientific) in 1 ml buffer for 15 min on ice. Lysates were sheared by passing through 20,22,25 and 26 gauge needles progressively, centrifuged at 21,000 rpm for 10 minutes at 4°C and supernatants collected. Protein concentrations were quantified using the BCA Protein Assay Kit (23225, Pierce), and 5-10 ug of protein was resolved on a 1.5-mm, 3-8% Tris-Acetate or 4-12% Bis-Tris SDS-PAGE gel (Thermo Fisher Scientific). Protein was transferred to nitrocellulose membranes (Amersham Bioscience). Membranes were allowed to block for 1h at room temperature in 5% nonfat milk in 1X TBS-T and then incubated overnight with a primary antibody diluted in 5% BSA in 1X TBS-T. The secondary antibodies used were anti-rabbit or anti-mouse immunoglobulin as appropriate (Cell Signaling) and diluted at 1:1000 in 5% nonfat milk in 1X TBS-T. Blots were developed using a chemiluminescent development solution (Super Signal West Femto, Pierce) and bands were imaged on a chemiluminescent imaging system (ChemiDoc Touch imaging System, Bio-Rad) or MicroChemi Chemiluminescent imager (FroggaBio Inc.). Digital images were quantified using background correction on the Alpha Innotech system (Protein Simple) and all bands were normalized to their respective β-actin, tubulin or GAPDH expression levels as loading controls.

**RNA isolation and RT-PCR:** The following primers and probes were utilized: DSP(Mm01351876\_m1), DSG1a(Mm00809994\_s1),DSG1b(Mm00839130\_mH),



DSG1c(Mm00725121\_g1) DSG3(Mm00659652\_m1), DSC3(Mm00492270\_m1), PKP1(Mm00451023\_m1), PKP2(Mm00503159\_m1), PKP3( Mm00451123\_m1), actin (Mm02619580\_g1) (TaqMan Gene Expression Assay, Applied Biosystems).

**Immunocytochemistry:** Cells were permeabilized and blocked in buffer containing 1X PBS, 5% normal donkey serum and 0.3% Triton X-100. Coverslips were incubated with indicated primary antibodies overnight at 4°C in antibody dilution buffer (ADB) containing 1X PBS, 1% BSA and 0.3% Triton X-100. After 3 PBS washes, coverslips were incubated with secondary antibodies (Alexafluor-488 or Alexafluor-594 conjugated, anti-Rabbit or anti-Mouse IgG, Thermo Scientific) in ADB (1:200) for 1 hour at room temperature. Nuclei were counterstained with DAPI.

**Quantification of membrane localized of Dsp, Dsg and E-cadherin in cultured cells:**

Border index for each protein was calculated based on the method published by (Godsel et al, J Cell Biol, 2005). Briefly, all immunofluorescence procedures, epifluorescence acquisition settings, and image analysis parameters were maintained across all technical and biological replicates for the analysis of a protein stain. For each sampled cell, a region of interest was manually drawn around its borders using ImageJ, and the same threshold was applied to remove background noise. For each thresholded region of interest, the border index was calculated by multiplying the mean fluorescence intensity by the area of the region of interest and divided by the border perimeter. **Quantification of cell**

**perimeter:** The perimeter of each cell was manually outlined as a region of interest and the perimeter was measured in pixels. **Quantification of nuclear Smad2/3 intensity:**

Cells were stained with DAPI to mark nuclei (blue channel) and anti-total Smad2/3 (green channel). Images were analyzed using ImageJ. The blue channel was used to segment nuclei as follows: the Smooth function was used 3 times, then images were thresholded to remove background, converted to binary images on which a Watershed function was applied to separate overlapping nuclei. Then the analyze Particles function was used for automatic detection of nuclear outlines. These nuclear outlines were applied to the green channel and mean fluorescence intensity of Smad2/3 within the regions was measured.

**Transmission Electron Microscopy:** Mouse skin samples were fixed in 2.5% glutaraldehyde, 3mM MgCl<sub>2</sub> and 1% sucrose, in 0.1 M sodium cacodylate buffer, pH 7.2 at 4°C overnight, followed by 3 buffer rinses, 15 minutes each, in 3mM MgCl<sub>2</sub>, 3% sucrose and 0.1 M sodium cacodylate. The samples were post-fixed in 1% osmium tetroxide in 0.1 M sodium cacodylate for 1 hour on ice in the dark, rinsed twice with distilled water for 5 minutes, stained with 2% aqueous uranyl acetate (0.22 µm filtered) for 1 hour in the dark, followed by dehydration in an ascending grade of ethanol (50%, 70%, 90% and 100%; thrice each) and embedded in an epoxy resin. The resin was allowed to polymerize at 37°C overnight for 2-3 days followed by 60°C overnight.

**Microarray analysis:** Mouse epidermis was separated from the dermis following incubation of E18.5 embryonic skin with 3.8% Ammonium thiocyanate (A7149, Sigma-Aldrich) for 10 minutes at room temperature. The epidermal sheet was homogenized in TRIzol and total RNA prepared using the TRIzol RNA extraction protocol (Thermo Fisher Scientific) at the Johns Hopkins Deep Sequencing & Microarray Core Facility. Integrity and concentration of RNA was evaluated using the Bioanalyzer 2100 (Agilent Technologies, Santa Clara, CA USA). Labeled cDNA probes were synthesized from reverse-transcribed mRNA templates and hybridized to the Affymetrix GeneChip® Mouse Transcriptome Array MTA 1.0 (Affymetrix Inc., Santa Clara, CA USA). Samples from six biological replicates each of RHEB WT and RHEB cKO mice were analyzed. Raw data generated as CEL files by the Affymetrix Expression Console were imported into the Partek Genomics Suite v6.6 for analysis. Data were normalized and log<sub>2</sub> transformed with the RMA (Robust Multi-Array Average) algorithm, underwent quality control, and were compared using a two tailed one way ANOVA between their two biological classes: *RHEB* cKO and *RHEB* WT. The list of 1,198 highly differentially expressed genes, with fold changes greater than 2 S.D. between RHEB WT versus RHEB cKO, is in **Supplementary Table S1**. These differentially expressed genes then underwent Canonical Pathway analysis using the Ingenuity Pathway Analysis platform (IPA, QIAGEN Redwood City, CA USA [www.ingenuity.com](http://www.ingenuity.com)).

Supplementary Table S1: Differentially expressed genes (&gt;2SD) in RHEB cKO vs WT epidermis at E18.5

| Probeset ID | RHEB_cK O vs. WT (p-val) | RHEB_cK O vs. WT Lin(FC) | RHEB_cKO vs. WT (Description) | RHEB_cK SD O vs. WT Log2(FC) | Gene CytoLoc | Gene EntrezID | Gene EntrezID | Gene Symbol | Gene Title                                                                     |
|-------------|--------------------------|--------------------------|-------------------------------|------------------------------|--------------|---------------|---------------|-------------|--------------------------------------------------------------------------------|
| TC0300000E  | 0.000797                 | 38.4788                  | RHEB_cKO up vs WT             | 5.26599 > +6σ                | 3 F1-F2 3    | 20201         | 20201         | S100a8      | S100 calcium binding protein A8 (calgranulin A)                                |
| TC0300002E  | 0.000305                 | 34.0958                  | RHEB_cKO up vs WT             | 5.09152 > +6σ                | 3 F1-F2 3    | 20202         | 20202         | S100a9      | S100 calcium binding protein A9 (calgranulin B)                                |
| TC0300000E  | 0.00115                  | 21.4185                  | RHEB_cKO up vs WT             | 4.42078 > +6σ                | 3 F1 3 40.   | 20760         | 20760         | Sprr2f      | small proline-rich protein 2F                                                  |
| TC0300000E  | 0.002045                 | 20.4921                  | RHEB_cKO up vs WT             | 4.357 > +6σ                  | 3 F1 3       | 69520         | 69520         | Lce3f       | late cornified envelope 3F                                                     |
| TC08000001  | 0.001408                 | 17.7214                  | RHEB_cKO up vs WT             | 4.14742 > +6σ                | 8 8          | 27358         | 27358         | Defb3       | defensin beta 3                                                                |
| TC0300000E  | 0.003389                 | 16.8731                  | RHEB_cKO up vs WT             | 4.07665 > +6σ                | 3 F1 3 40.   | 20761         | 20761         | Sprr2g      | small proline-rich protein 2G                                                  |
| TC0300002E  | 7.08E-05                 | 14.2322                  | RHEB_cKO up vs WT             | 3.83108 > +6σ                | 3 F1 3 40.   | 20754         | 20754         | Sprr1b      | small proline-rich protein 1B                                                  |
| TC0300000E  | 0.002107                 | 13.2807                  | RHEB_cKO up vs WT             | 3.73126 > +6σ                | 3 F1 3       | 630994        | 630994        | Lce3d       | late cornified envelope 3D                                                     |
| TC0300000E  | 0.00107                  | 11.9369                  | RHEB_cKO up vs WT             | 3.57736 > +6σ                | 3 F1 3 40.   | 20764         | 20764         | Sprr2j-ps   | small proline-rich protein 2J, pseudogene                                      |
| TC0300000E  | 0.000186                 | 10.7404                  | RHEB_cKO up vs WT             | 3.42497 > +6σ                | 3 F1 3       | 381493        | 381493        | S100a7a     | S100 calcium binding protein A7A                                               |
| TC03000024  | 0.003119                 | 10.6727                  | RHEB_cKO up vs WT             | 3.41586 > +6σ                | 3 F1 3       | 545548        | 545548        | Lce3a       | late cornified envelope 3A                                                     |
| TC0300002E  | 0.00028                  | 9.93365                  | RHEB_cKO up vs WT             | 3.31232 > +6σ                | 3 F1 3 40.   | 20753         | 20753         | Sprr1a      | small proline-rich protein 1A                                                  |
| TC0100001E  | 0.004786                 | 9.7266                   | RHEB_cKO up vs WT             | 3.28194 > +6σ                | 1 H1 1 63.   | 19225         | 19225         | Ptgs2       | prostaglandin-endoperoxide synthase 2                                          |
| TC1500002E  | 0.000169                 | 9.55391                  | RHEB_cKO up vs WT             | 3.25609 > +6σ                | 15 F2 15     | 406223        | 406223        | Gm5414      | predicted gene 5414                                                            |
| TC1600000E  | 0.000109                 | 9.02367                  | RHEB_cKO up vs WT             | 3.17371 > +6σ                | 16 B3 16     | 408196        | 408196        | Gm5416      | predicted gene 5416                                                            |
| TC0300000E  | 0.000628                 | 8.84585                  | RHEB_cKO up vs WT             | 3.145 > +6σ                  | 3 F1 3 40.   | 20759         | 20759         | Sprr2e      | small proline-rich protein 2E                                                  |
| TC1500002E  | 0.000366                 | 8.33038                  | RHEB_cKO up vs WT             | 3.05838 > +6σ                | 15 F2 15 5   | 16687         | 16687         | Krt6a       | keratin 6A                                                                     |
| TC15000017  | 2.76E-05                 | 7.84124                  | RHEB_cKO up vs WT             | 2.97108 > +6σ                | 15 D3 15 5   | 11838         | 11838         | Arc         | activity regulated cytoskeletal-associated protein                             |
| TC0200001C  | 0.00362                  | 7.71179                  | RHEB_cKO up vs WT             | 2.94707 > +6σ                | 2 C2 2       | 241452        | 241452        | Dhrs9       | dehydrogenase/reductase (SDR family) member 9                                  |
| TC0500000E  | 0.000512                 | 7.62878                  | RHEB_cKO up vs WT             | 2.93145 > +6σ                | ---          | 71920         | 71920         | Epgn        | epithelial mitogen                                                             |
| TC0800001E  | 0.000581                 | 7.52137                  | RHEB_cKO up vs WT             | 2.911 > +6σ                  | 8 A3 8       | 211323        | 211323        | Nrg1        | neuregulin 1                                                                   |
| TC0300000E  | 0.003576                 | 7.06496                  | RHEB_cKO up vs WT             | 2.82068 > +6σ                | 3 F1 3 40.   | 20758         | 20758         | Sprr2d      | small proline-rich protein 2D                                                  |
| TC0100003E  | 0.003563                 | 7.00865                  | RHEB_cKO up vs WT             | 2.80914 > +6σ                | 1 H3 1       | 666028        | 666028        | Gm7897      | predicted gene 7897                                                            |
| TC0300000E  | 0.000604                 | 6.88644                  | RHEB_cKO up vs WT             | 2.78376 > +6σ                | 3 F1 3 40.   | 20763         | 20763         | Sprr2i      | small proline-rich protein 2I                                                  |
| TC0600000E  | 9.28E-05                 | 6.77061                  | RHEB_cKO up vs WT             | 2.75928 > +6σ                | 6 B1 6 14.   | 14187         | 14187         | Akr1b8      | aldo-keto reductase family 1, member B8                                        |
| TC08000001  | 0.002984                 | 6.73769                  | RHEB_cKO up vs WT             | 2.75225 > +6σ                | 8 A1.3 8     | 56519         | 56519         | Defb4       | defensin beta 4                                                                |
| TC07000007  | 0.001038                 | 6.67023                  | RHEB_cKO up vs WT             | 2.73774 > +6σ                | 7 B4 7 28.   | 69540         | 69540         | Klk10       | kallikrein related-peptidase 10                                                |
| TC11000037  | 3.65E-05                 | 6.26662                  | RHEB_cKO up vs WT             | 2.64769 > +6σ                | 11 D 11      | 16666         | 16666         | Krt16       | keratin 16                                                                     |
| TC0900000C  | 2.84E-05                 | 6.21186                  | RHEB_cKO up vs WT             | 2.63503 > +6σ                | 9 A1 9 2.4   | 17392         | 17392         | Mmp3        | matrix metalloproteinase 3                                                     |
| TC10000012  | 0.001279                 | 6.17593                  | RHEB_cKO up vs WT             | 2.62666 > +6σ                | 10 10 C3     | 67603         | 67603         | Dusp6       | dual specificity phosphatase 6                                                 |
| TC0100003C  | 1.94E-05                 | 5.86237                  | RHEB_cKO up vs WT             | 2.55148 > +6σ                | 1 E4 1       | 93672         | 93672         | Il24        | interleukin 24                                                                 |
| TC11000037  | 4.53E-05                 | 5.83589                  | RHEB_cKO up vs WT             | 2.54495 > +6σ                | ---          | ---           | ---           | Gm11597     | predicted gene 11597                                                           |
| TC0900000E  | 0.00182                  | 5.79621                  | RHEB_cKO up vs WT             | 2.53511 > +6σ                | 9 9 B        | 76509         | 76509         | Plet1       | placenta expressed transcript 1                                                |
| TC1300000E  | 0.000795                 | 5.12175                  | RHEB_cKO up vs WT             | 2.35664 > +6σ                | 13 A3.2 1    | 218121        | 218121        | Mboat1      | membrane bound O-acyltransferase domain containing 1                           |
| TC18000001  | 0.001223                 | 5.00993                  | RHEB_cKO up vs WT             | 2.32479 > +6σ                | 18 A2 18 1   | 13512         | 13512         | Dsg3        | desmoglein 3                                                                   |
| TC0300000E  | 0.002529                 | 4.95249                  | RHEB_cKO up vs WT             | 2.30815 > +6σ                | 3 F1 3 40.   | 20762         | 20762         | Sprr2h      | small proline-rich protein 2H                                                  |
| TC02000044  | 0.006298                 | 4.69922                  | RHEB_cKO up vs WT             | 2.23242 > +6σ                | 2 E5 2       | 329502        | 329502        | Pla2g4e     | phospholipase A2, group IVE                                                    |
| TC1500002E  | 0.001025                 | 4.61868                  | RHEB_cKO up vs WT             | 2.20748 > +6σ                | 15 F2 15     | 432985        | 432985        | Gm5476      | type II keratin Kb17P pseudogene                                               |
| TC01000037  | 0.000206                 | 4.59703                  | RHEB_cKO up vs WT             | 2.2007 > +6σ                 | 1 H5 1       | 12334         | 12334         | Capn2       | calpain 2                                                                      |
| TC0300000E  | 0.01792                  | 4.58465                  | RHEB_cKO up vs WT             | 2.19681 > +6σ                | 3 F1 3       | 242100        | 242100        | Pglyrp3     | peptidoglycan recognition protein 3                                            |
| TC0300000E  | 0.040014                 | 4.49185                  | RHEB_cKO up vs WT             | 2.16731 > +6σ                | 3 F1 3       | 69514         | 69514         | Lce3e       | late cornified envelope 3E                                                     |
| TC0800000E  | 0.001135                 | 4.44329                  | RHEB_cKO up vs WT             | 2.15163 > +6σ                | 8 8          | 387216        | 387216        | Mir23a      | microRNA 23a                                                                   |
| TC1100003E  | 0.001712                 | 4.39998                  | RHEB_cKO up vs WT             | 2.1375 > +6σ                 | 11 D 11      | 217169        | 217169        | Tns4        | tensin 4                                                                       |
| TC0300000E  | 0.009364                 | 4.34193                  | RHEB_cKO up vs WT             | 2.11834 > +6σ                | 3 F1 3       | 66344         | 66344         | Lce3b       | late cornified envelope 3B                                                     |
| TC0400001E  | 0.000797                 | 4.32072                  | RHEB_cKO up vs WT             | 2.11127 > +6σ                | 4 E2 4 78.   | 18158         | 18158         | Nppb        | natriuretic peptide type B                                                     |
| TC0X00002E  | 0.001138                 | 4.31771                  | RHEB_cKO up vs WT             | 2.11027 > +6σ                | X C-D X 39   | 14933         | 14933         | Gk          | glycerol kinase                                                                |
| TC0200000E  | 0.001717                 | 4.30934                  | RHEB_cKO up vs WT             | 2.10747 > +6σ                | 2 C1.1 2     | 71409         | 71409         | Fmn12       | formin-like 2                                                                  |
| TC13000017  | 0.001439                 | 4.27612                  | RHEB_cKO up vs WT             | 2.0963 > +6σ                 | 13 A3.3 1    | 97848         | 97848         | Serpinb6c   | serine (or cysteine) peptidase inhibitor, clade B, member 6c                   |
| TC1000003C  | 0.000989                 | 4.21317                  | RHEB_cKO up vs WT             | 2.0749 > +6σ                 | 10 D2 10 6   | 15364         | 15364         | Hmg2        | high mobility group AT-hook 2                                                  |
| TC18000007  | 0.000177                 | 4.14075                  | RHEB_cKO up vs WT             | 2.04989 > +6σ                | 18 18 E1     | 67951         | 67951         | Tubb6       | tubulin, beta 6 class V                                                        |
| TC0300002E  | 0.008852                 | 4.06674                  | RHEB_cKO up vs WT             | 2.02387 +6σ                  | 3 F1 3 40.   | 229562        | 229562        | Sprr4       | small proline-rich protein 4                                                   |
| TC0300000E  | 0.020518                 | 3.97958                  | RHEB_cKO up vs WT             | 1.99262 +6σ                  | 3 3 F1-F2    | 20129         | 20129         | Rptn        | repetin                                                                        |
| TC19000004  | 0.000728                 | 3.95121                  | RHEB_cKO up vs WT             | 1.9823 +6σ                   | 19 19 C2     | 77125         | 77125         | Il33        | interleukin 33                                                                 |
| TC0100003E  | 0.001538                 | 3.92505                  | RHEB_cKO up vs WT             | 1.97271 +6σ                  | 1 F 1 62.5   | 19735         | 19735         | Rgs2        | regulator of G-protein signaling 2                                             |
| TC0600001E  | 0.007243                 | 3.89992                  | RHEB_cKO up vs WT             | 1.96344 +6σ                  | 6 G1 6       | 232431        | 232431        | Gprc5a      | G protein-coupled receptor, family C, group 5, member A                        |
| TC18000011  | 0.000307                 | 3.88841                  | RHEB_cKO up vs WT             | 1.95918 +6σ                  | 18 B2 18 1   | 15200         | 15200         | Hbegf       | heparin-binding EGF-like growth factor                                         |
| TC0300000E  | 0.0017                   | 3.84409                  | RHEB_cKO up vs WT             | 1.94264 +6σ                  | 3 F1-F2 3    | 20200         | 20200         | S100a6      | S100 calcium binding protein A6 (calcyclin)                                    |
| TC01000034  | 0.002108                 | 3.81185                  | RHEB_cKO up vs WT             | 1.93049 +6σ                  | 1 H2.3 1     | 80914         | 80914         | Uck2        | uridine-cytidine kinase 2                                                      |
| TC0300003C  | 0.00318                  | 3.77507                  | RHEB_cKO up vs WT             | 1.9165 +6σ                   | 3 H2 3 70.   | 16007         | 16007         | Cyr61       | cysteine rich protein 61                                                       |
| TC07000007  | 0.015803                 | 3.6726                   | RHEB_cKO up vs WT             | 1.8768 +6σ                   | 7 B4-B5 7    | 19144         | 19144         | Klk6        | kallikrein related-peptidase 6                                                 |
| TC1100003E  | 0.007812                 | 3.60834                  | RHEB_cKO up vs WT             | 1.85134 +6σ                  | 11 D 11 5    | 16400         | 16400         | Itga3       | integrin alpha 3                                                               |
| TC18000001  | 0.002326                 | 3.58938                  | RHEB_cKO up vs WT             | 1.84374 +6σ                  | 18 A1 18     | 72504         | 72504         | Taf4b       | TATA-box binding protein associated factor 4b                                  |
| TC0100001C  | 0.008692                 | 3.55466                  | RHEB_cKO up vs WT             | 1.82971 +6σ                  | 1 E2.1 1     | 66957         | 66957         | Serpinb11   | serine (or cysteine) peptidase inhibitor, clade B (ovalbumin), member 11       |
| TC0800000E  | 1.24E-05                 | 3.53624                  | RHEB_cKO up vs WT             | 1.82222 +6σ                  | 8 8          | 387220        | 387220        | Mir27a      | microRNA 27a                                                                   |
| TC0600001C  | 0.000735                 | 3.51779                  | RHEB_cKO up vs WT             | 1.81467 +6σ                  | 6 D1 6 40.   | 21366         | 21366         | Slc6a6      | solute carrier family 6 (neurotransmitter transporter, taurine), member 6      |
| TC0900001E  | 0.001951                 | 3.48228                  | RHEB_cKO up vs WT             | 1.80003 +6σ                  | 9 F1 9       | 235584        | 235584        | Dusp7       | dual specificity phosphatase 7                                                 |
| TC0200001C  | 0.011685                 | 3.47741                  | RHEB_cKO up vs WT             | 1.79801 +6σ                  | 2 C2-C3 2    | 16403         | 16403         | Itga6       | integrin alpha 6                                                               |
| TC0500002E  | 0.008744                 | 3.43367                  | RHEB_cKO up vs WT             | 1.77975 +6σ                  | 5 E3 5       | 71914         | 71914         | Antxr2      | anthrax toxin receptor 2                                                       |
| TC13000017  | 0.001238                 | 3.37857                  | RHEB_cKO up vs WT             | 1.75641 +6σ                  | 13 A4 13     | 66895         | 66895         | Pxdc1       | PX domain containing 1                                                         |
| TC0800003C  | 0.001799                 | 3.32285                  | RHEB_cKO up vs WT             | 1.73242 +6σ                  | ---          | ---           | ---           | Gm17709     | predicted gene, 17709                                                          |
| TC04000024  | 0.008479                 | 3.32193                  | RHEB_cKO up vs WT             | 1.73202 +6σ                  | 4 B1 4       | 11828         | 11828         | Aqp3        | aquaporin 3                                                                    |
| TC07000044  | 0.000135                 | 3.29473                  | RHEB_cKO up vs WT             | 1.72016 +6σ                  | 7 7 F3-F5    | 11501         | 11501         | Adam8       | a disintegrin and metalloproteinase domain 8                                   |
| TC12000001  | 0.002762                 | 3.28073                  | RHEB_cKO up vs WT             | 1.71401 +6σ                  | 12 A1.1 1    | 18263         | 18263         | Odc1        | ornithine decarboxylase, structural 1                                          |
| TC14000007  | 0.007538                 | 3.27257                  | RHEB_cKO up vs WT             | 1.71043 +6σ                  | 14 C3 14 2   | 16995         | 16995         | Ltb4r1      | leukotriene B4 receptor 1                                                      |
| TC1800001E  | 0.00024                  | 3.25484                  | RHEB_cKO up vs WT             | 1.70259 +6σ                  | 18 18 E2     | 16891         | 16891         | Lipg        | lipase, endothelial                                                            |
| TC1500002E  | 0.038914                 | 3.25249                  | RHEB_cKO up vs WT             | 1.70155 +6σ                  | 15 F2 15 5   | 109052        | 109052        | Krt75       | keratin 75                                                                     |
| TC0300000E  | 0.000684                 | 3.24704                  | RHEB_cKO up vs WT             | 1.69912 +6σ                  | 3 E1 3       | 99929         | 99929         | Tiparp      | TCDD-inducible poly(ADP-ribose) polymerase                                     |
| TC1200001E  | 0.010019                 | 3.24517                  | RHEB_cKO up vs WT             | 1.69829 +6σ                  | 12 12 D2     | 27260         | 27260         | Plek2       | pleckstrin 2                                                                   |
| TC01000014  | 0.004146                 | 3.24427                  | RHEB_cKO up vs WT             | 1.69789 +6σ                  | 1 H2.1 1     | 67647         | 67647         | 4930523C    | RIKEN cDNA 4930523C07 gene                                                     |
| TC1300001E  | 0.003845                 | 3.22514                  | RHEB_cKO up vs WT             | 1.68936 +6σ                  | 13 A5 13 2   | 20238         | 20238         | Atxn1       | ataxin 1                                                                       |
| TC0200003E  | 0.00721                  | 3.22368                  | RHEB_cKO up vs WT             | 1.68871 +6σ                  | 2 B-C1 2 2   | 13830         | 13830         | Stom        | stomatrin                                                                      |
| TC03000011  | 0.002132                 | 3.1643                   | RHEB_cKO up vs WT             | 1.66189 +6σ                  | 3 F3 3       | 229731        | 229731        | Slc25a24    | solute carrier family 25 (mitochondrial carrier, phosphate carrier), member 24 |
| TC0100003E  | 0.002836                 | 3.15927                  | RHEB_cKO up vs WT             | 1.65959 +6σ                  | 1 H3 1       | 26388         | 26388         | Ifi202b     | interferon activated gene 202B                                                 |
| TC0400003E  | 0.00084                  | 3.15005                  | RHEB_cKO up vs WT             | 1.65537 +6σ                  | 4 4 D3       | 67149         | 67149         | Nkain1      | Na+/K+ transporting ATPase interacting 1                                       |

|            |          |         |                   |             |             |          |          |           |                                                                                 |
|------------|----------|---------|-------------------|-------------|-------------|----------|----------|-----------|---------------------------------------------------------------------------------|
| TC17000015 | 0.000382 | 3.14671 | RHEB_cKO up vs WT | 1.65384 +6σ | 17 A3.3 1:  | 27279    | 27279    | Tnfrsf12a | tumor necrosis factor receptor superfamily, member 12a                          |
| TC02000018 | 0.000228 | 3.13125 | RHEB_cKO up vs WT | 1.64674 +6σ | 2 E5 2      | 99439    | 99439    | Duox1     | dual oxidase 1                                                                  |
| TC05000006 | 0.015846 | 3.10094 | RHEB_cKO up vs WT | 1.63271 +6σ | 5 C3.2 5    | 231293   | 231293   | Cwh43     | cell wall biogenesis 43 C-terminal homolog                                      |
| TC04000036 | 0.002311 | 3.06675 | RHEB_cKO up vs WT | 1.61671 +6σ | 4 4 D3      | 94242    | 94242    | Tinag1    | tubulointerstitial nephritis antigen-like 1                                     |
| TC04000012 | 0.037862 | 3.03854 | RHEB_cKO up vs WT | 1.60338 +6σ | ---         | ---      | ---      | Gm12840   | predicted gene 12840                                                            |
| TC15000022 | 0.000134 | 3.03736 | RHEB_cKO up vs WT | 1.60282 +6σ | 15 F2 15    | 432987   | 432987   | Gm5478    | predicted pseudogene 5478                                                       |
| TC03000003 | 0.030245 | 3.03565 | RHEB_cKO up vs WT | 1.60201 +6σ | 3 B 3       | 18415    | 18415    | Hspa4l    | heat shock protein 4 like                                                       |
| TC11000020 | 0.003938 | 3.0342  | RHEB_cKO up vs WT | 1.60132 +6σ | 11 E2 11 E  | 111241   | 111241   | Hmga1-rs1 | high mobility group AT-hook I, related sequence 1                               |
| TC0X000006 | 0.002403 | 3.01754 | RHEB_cKO up vs WT | 1.59337 +6σ | X X B       | 75590    | 75590    | Dusp9     | dual specificity phosphatase 9                                                  |
| TC04000024 | 0.450121 | 3.0145  | RHEB_cKO up vs WT | 1.59192 +6σ | ---         | ---      | ---      | Gm13303   | predicted gene 13303                                                            |
| TC01000038 | 0.000483 | 3.01073 | RHEB_cKO up vs WT | 1.59011 +6σ | 1 E2.1 1 5: | 18788    | 18788    | Serpnb2   | serine (or cysteine) peptidase inhibitor, clade B, member 2                     |
| TC15000010 | 0.006292 | 3.00474 | RHEB_cKO up vs WT | 1.58724 +6σ | 15 15 F     | 15370    | 15370    | Nr4a1     | nuclear receptor subfamily 4, group A, member 1                                 |
| TC15000001 | 0.016427 | 2.97788 | RHEB_cKO up vs WT | 1.57429 +6σ | 15 F1 15    | 67760    | 67760    | Slc38a2   | solute carrier family 38, member 2                                              |
| TC11000009 | 0.0173   | 2.93686 | RHEB_cKO up vs WT | 1.55427 +6σ | 11 B3 11 4: | 20670    | 20670    | Sox15     | SRY (sex determining region Y)-box 15                                           |
| TC03000008 | 0.00939  | 2.92758 | RHEB_cKO up vs WT | 1.54971 +6σ | 3 F1 3 40:  | 20765    | 20765    | Sprr2k    | small proline-rich protein 2K                                                   |
| TC18000013 | 0.006423 | 2.9234  | RHEB_cKO up vs WT | 1.54765 +6σ | 18 D3 18    | 106878   | 106878   | Smim3     | small integral membrane protein 3                                               |
| TC08000025 | 0.001733 | 2.91911 | RHEB_cKO up vs WT | 1.54553 +6σ | 8 C2 8 40:  | 26364    | 26364    | Adgre5    | adhesion G protein-coupled receptor E5                                          |
| TC0X000011 | 0.002878 | 2.90195 | RHEB_cKO up vs WT | 1.53702 +6σ | ---         | ---      | ---      | Gm14928   | predicted gene 14928                                                            |
| TC12000001 | 0.01698  | 2.89631 | RHEB_cKO up vs WT | 1.53421 +6σ | ---         | ---      | ---      | Gm22303   | predicted gene, 22303                                                           |
| TC04000034 | 0.004154 | 2.89503 | RHEB_cKO up vs WT | 1.53358 +6σ | 4 4 D1      | 76574    | 76574    | Mfsd2a    | major facilitator superfamily domain containing 2A                              |
| TC0X000027 | 0.002694 | 2.89286 | RHEB_cKO up vs WT | 1.5325 +6σ  | ---         | ---      | ---      | Gm9115    | predicted gene 9115                                                             |
| TC08000030 | 0.002655 | 2.89014 | RHEB_cKO up vs WT | 1.53114 +6σ | 8 E1 8 70:  | 20539    | 20539    | Slc7a5    | solute carrier family 7 (cationic amino acid transporter, y+ system), member 5  |
| TC08000006 | 0.00167  | 2.88347 | RHEB_cKO up vs WT | 1.52781 +6σ | 8 B3.3 8    | 234344   | 234344   | Naf1      | nuclear assembly factor 1 ribonucleoprotein                                     |
| TC0X000019 | 0.032636 | 2.86324 | RHEB_cKO up vs WT | 1.51765 +6σ | ---         | ---      | ---      | Gm26652   | predicted gene, 26652                                                           |
| TC14000022 | 0.004807 | 2.84225 | RHEB_cKO up vs WT | 1.50703 +6σ | 14 D1 14 3: | 19229    | 19229    | Ptk2b     | PTK2 protein tyrosine kinase 2 beta                                             |
| TC04000028 | 0.01973  | 2.84022 | RHEB_cKO up vs WT | 1.506 +6σ   | 4 C1 4 34:  | 21923    | 21923    | Tnc       | tenascin C                                                                      |
| TC04000004 | 0.351385 | 2.82231 | RHEB_cKO up vs WT | 1.49688 +6σ | ---         | ---      | ---      | Gm10600   | predicted gene 10600                                                            |
| TC08000001 | 0.004036 | 2.81174 | RHEB_cKO up vs WT | 1.49147 +6σ | 8 A1.3 8    | 244332   | 244332   | Defb14    | defensin beta 14                                                                |
| TC11000037 | 0.010257 | 2.80846 | RHEB_cKO up vs WT | 1.48978 +6σ | 11 D 11 6:  | 16664    | 16664    | Krt14     | keratin 14                                                                      |
| TC17000021 | 0.005917 | 2.79185 | RHEB_cKO up vs WT | 1.48122 +6σ | 17 17 C     | 71583    | 71583    | 9130008F2 | RIKEN cDNA 9130008F23 gene                                                      |
| TC08000010 | 0.003112 | 2.78162 | RHEB_cKO up vs WT | 1.47592 +6σ | 8 C5 8 46:  | 17750    | 17750    | Mt2       | metallothionein 2                                                               |
| TC05000008 | 0.004343 | 2.77443 | RHEB_cKO up vs WT | 1.47219 +6σ | 5 E1 5 44:  | 11839    | 11839    | Areg      | amphiregulin                                                                    |
| TC05000036 | 0.006398 | 2.76923 | RHEB_cKO up vs WT | 1.46949 +6σ | 5 G3 5 88:  | 11987    | 11987    | Slc7a1    | solute carrier family 7 (cationic amino acid transporter, y+ system), member 1  |
| TC10000022 | 0.00206  | 2.76193 | RHEB_cKO up vs WT | 1.46567 +6σ | 10 B4-B5.1  | 56200    | 56200    | Ddx21     | DEAD (Asp-Glu-Ala-Asp) box polypeptide 21                                       |
| TC09000033 | 0.010264 | 2.75115 | RHEB_cKO up vs WT | 1.46003 +6σ | 9 F 9 74.2: | 102680   | 102680   | Slc6a20a  | solute carrier family 6 (neurotransmitter transporter), member 20A              |
| TC11000038 | 0.001401 | 2.7354  | RHEB_cKO up vs WT | 1.45175 +6σ | 11 D 11 6:  | 18612    | 18612    | Etv4      | ets variant 4                                                                   |
| TC09000020 | 0.006021 | 2.72785 | RHEB_cKO up vs WT | 1.44776 +6σ | ---         | ---      | ---      | RP24-570C | NOP56 ribonucleoprotein (Nop56) pseudogene                                      |
| TC01000014 | 0.006913 | 2.71295 | RHEB_cKO up vs WT | 1.43986 +6σ | 1 G3-H1 1   | 11352    | 11352    | Abl2      | v-abl Abelson murine leukemia viral oncogene 2 (arg, Abelson-related gene)      |
| TC01000038 | 0.07734  | 2.70829 | RHEB_cKO up vs WT | 1.43738 +6σ | 1 E2.1 1    | 241197   | 241197   | Serpnb10  | serine (or cysteine) peptidase inhibitor, clade B (ovalbumin), member 10        |
| TC03000008 | 0.064026 | 2.68853 | RHEB_cKO up vs WT | 1.42682 +6σ | 3 F1 3      | 94060    | 94060    | Lce3c     | late cornified envelope 3C                                                      |
| TC04000004 | 0.34438  | 2.66305 | RHEB_cKO up vs WT | 1.41308 +6σ | ---         | 1.01E+08 | 1.01E+08 | Gm13301   | predicted gene 13301                                                            |
| TC03000025 | 0.001488 | 2.65905 | RHEB_cKO up vs WT | 1.41091 +6σ | 3 G3 3      | 74442    | 74442    | Sgms2     | sphingomyelin synthase 2                                                        |
| TC08000015 | 0.004259 | 2.65721 | RHEB_cKO up vs WT | 1.40991 +6σ | 8 E2 8      | 16412    | 16412    | Itgb1     | integrin beta 1 (fibronectin receptor beta)                                     |
| TC08000012 | 0.002616 | 2.65082 | RHEB_cKO up vs WT | 1.40644 +6σ | 8 D3 8      | 21771    | 21771    | Cirh1a    | cirrhosis, autosomal recessive 1A (human)                                       |
| TC17000005 | 0.009401 | 2.63512 | RHEB_cKO up vs WT | 1.39787 +6σ | 17 17       | 11307    | 11307    | Abcg1     | ATP-binding cassette, sub-family G (WHITE), member 1                            |
| TC04000003 | 0.473544 | 2.63225 | RHEB_cKO up vs WT | 1.3963 +6σ  | ---         | ---      | ---      | Gm10601   | predicted pseudogene 10601                                                      |
| TC13000012 | 0.001813 | 2.62656 | RHEB_cKO up vs WT | 1.39317 +6σ | 13 13 D2:   | 20620    | 20620    | Plk2      | polo-like kinase 2                                                              |
| TC13000002 | 0.023155 | 2.62243 | RHEB_cKO up vs WT | 1.39091 +6σ | 13 A2-A3    | 319181   | 319181   | Hist1h2bg | histone cluster 1, H2bg                                                         |
| TC07000008 | 0.007607 | 2.62087 | RHEB_cKO up vs WT | 1.39004 +6σ | 7 B4 7      | 243983   | 243983   | Zdhhc13   | zinc finger, DHHC domain containing 13                                          |
| TC15000021 | 0.002635 | 2.61618 | RHEB_cKO up vs WT | 1.38746 +6σ | 15 F1 15 5  | 19011    | 19011    | Endou     | endonuclease, polyU-specific                                                    |
| TC06000032 | 0.005444 | 2.61445 | RHEB_cKO up vs WT | 1.38651 +6σ | ---         | 1.02E+08 | 1.02E+08 | Mir7649   | microRNA 7649                                                                   |
| TC19000000 | 0.00129  | 2.60231 | RHEB_cKO up vs WT | 1.3798 +6σ  | 19 A 19 4:  | 14283    | 14283    | Fosl1     | fos-like antigen 1                                                              |
| TC11000034 | 0.124897 | 2.60171 | RHEB_cKO up vs WT | 1.37946 +6σ | 11 C 11     | 76113    | 76113    | Lpo       | lactoperoxidase                                                                 |
| TC04000037 | 0.000181 | 2.60055 | RHEB_cKO up vs WT | 1.37882 +6σ | 4 D3 4 66:  | 55948    | 55948    | Sfn       | stratifin                                                                       |
| TC05000034 | 0.006834 | 2.60023 | RHEB_cKO up vs WT | 1.37864 +6σ | 5 G2 5      | 18787    | 18787    | Serpine1  | serine (or cysteine) peptidase inhibitor, clade E, member 1                     |
| TC06000024 | 0.026496 | 2.59717 | RHEB_cKO up vs WT | 1.37694 +6σ | 6 6 D-E     | 54486    | 54486    | Hpgds     | hematopoietic prostaglandin D synthase                                          |
| TC16000019 | 0.008612 | 2.59685 | RHEB_cKO up vs WT | 1.37676 +6σ | 16 C3-C5 :  | 11504    | 11504    | Adamts1   | a disintegrin-like and metalloproteinase (reprolysin type) with thrombospondin  |
| TC14000016 | 0.006194 | 2.5938  | RHEB_cKO up vs WT | 1.37507 +6σ | 14 B 14 15: | 30877    | 30877    | Gnl3      | guanine nucleotide binding protein-like 3 (nucleolar)                           |
| TC19000000 | 0.002755 | 2.59169 | RHEB_cKO up vs WT | 1.37389 +6σ | 19 A 19     | 13340    | 13340    | Slc29a2   | solute carrier family 29 (nucleoside transporters), member 2                    |
| TC13000017 | 0.006704 | 2.58474 | RHEB_cKO up vs WT | 1.37002 +6σ | 13 13 A4    | 73710    | 73710    | Tubb2b    | tubulin, beta 2B class IIB                                                      |
| TC13000016 | 0.013611 | 2.58412 | RHEB_cKO up vs WT | 1.36967 +6σ | ---         | ---      | ---      | Gm22358   | predicted gene, 22358                                                           |
| TC10000026 | 0.009577 | 2.58177 | RHEB_cKO up vs WT | 1.36836 +6σ | 10 C1 10    | 70683    | 70683    | Utp20     | UTP20 small subunit processome component                                        |
| TC19000006 | 0.002707 | 2.58157 | RHEB_cKO up vs WT | 1.36825 +6σ | 19 C3 19    | 70769    | 70769    | Nolc1     | nucleolar and coiled-body phosphoprotein 1                                      |
| TC02000008 | 0.00444  | 2.56297 | RHEB_cKO up vs WT | 1.35781 +6σ | 2 C1.1 2 3  | 14571    | 14571    | Gpd2      | glycerol phosphate dehydrogenase 2, mitochondrial                               |
| TC04000018 | 0.000539 | 2.56111 | RHEB_cKO up vs WT | 1.35677 +6σ | 4 D2.2 4    | 230718   | 230718   | Nt5c1a    | 5'-nucleotidase, cytosolic 1A                                                   |
| TC13000000 | 0.003351 | 2.55859 | RHEB_cKO up vs WT | 1.35535 +6σ | 13 A1 13 4: | 217995   | 217995   | Heatr1    | HEAT repeat containing 1                                                        |
| TC18000010 | 0.057416 | 2.54214 | RHEB_cKO up vs WT | 1.34604 +6σ | 18 A2 18 1: | 13506    | 13506    | Dsc2      | desmocollin 2                                                                   |
| TC02000042 | 0.01366  | 2.5343  | RHEB_cKO up vs WT | 1.34159 +6σ | 2 E2 2 54:  | 12505    | 12505    | Cd44      | CD44 antigen                                                                    |
| TC12000001 | 0.019766 | 2.53355 | RHEB_cKO up vs WT | 1.34116 +6σ | 12 12 A3    | 19878    | 19878    | Rock2     | Rho-associated coiled-coil containing protein kinase 2                          |
| TC0X000018 | 0.009116 | 2.52905 | RHEB_cKO up vs WT | 1.3386 +6σ  | ---         | ---      | ---      | Gm9432    | predicted gene 9432                                                             |
| TC17000003 | 0.082411 | 2.52493 | RHEB_cKO up vs WT | 1.33625 +6σ | 17 A3.3 17  | 213171   | 213171   | Prss27    | protease, serine 27                                                             |
| TC06000014 | 0.001486 | 2.52321 | RHEB_cKO up vs WT | 1.33526 +6σ | 6 F2-F3 6:  | 110109   | 110109   | Nop2      | NOP2 nucleolar protein                                                          |
| TC13000027 | 0.023185 | 2.50571 | RHEB_cKO up vs WT | 1.32522 +6σ | 13 D2.2 1:  | 16398    | 16398    | Itga2     | integrin alpha 2                                                                |
| TC06000018 | 0.002564 | 2.50452 | RHEB_cKO up vs WT | 1.32454 +6σ | 6 A1 6      | 50799    | 50799    | Slc25a13  | solute carrier family 25 (mitochondrial carrier, adenine nucleotide translocato |
| TC06000032 | 0.016632 | 2.50259 | RHEB_cKO up vs WT | 1.32342 +6σ | 6 6 63.11:  | 1.01E+08 | 1.01E+08 | Gm15987   | predicted gene 15987                                                            |
| TC07000020 | 0.000371 | 2.50251 | RHEB_cKO up vs WT | 1.32338 +6σ | 7 F5 7      | 76974    | 76974    | Urah      | urate (5-hydroxyiso-) hydrolase                                                 |
| TC11000037 | 0.006625 | 2.48972 | RHEB_cKO up vs WT | 1.31599 +6σ | 11 D 11 6:  | 16667    | 16667    | Krt17     | keratin 17                                                                      |
| TC02000042 | 0.03051  | 2.4863  | RHEB_cKO up vs WT | 1.314 +6σ   | 2 E2 2      | 13661    | 13661    | Ehf       | ets homologous factor                                                           |
| TC07000007 | 0.022123 | 2.48243 | RHEB_cKO up vs WT | 1.31175 +6σ | 7 B4 7 28:  | 69511    | 69511    | KLK12     | kallikrein related-peptidase 12                                                 |
| TC14000022 | 0.008936 | 2.47887 | RHEB_cKO up vs WT | 1.30968 +6σ | 14 D1 14    | 68813    | 68813    | Dock5     | dedicator of cytokinesis 5                                                      |
| TC10000005 | 0.025972 | 2.47837 | RHEB_cKO up vs WT | 1.30939 +6σ | 10 B4 10    | 432466   | 432466   | Gm5424    | argininosuccinate synthase pseudogene                                           |
| TC09000033 | 0.008704 | 2.47695 | RHEB_cKO up vs WT | 1.30856 +6σ | 9 F4 9      | 109332   | 109332   | Cdcp1     | CUB domain containing protein 1                                                 |
| TC15000003 | 0.006999 | 2.47589 | RHEB_cKO up vs WT | 1.30794 +6σ | 15 D1 15:   | 97998    | 97998    | Deptor    | DEP domain containing MTOR-interacting protein                                  |
| TC04000004 | 0.360445 | 2.4742  | RHEB_cKO up vs WT | 1.30696 +6σ | 4 A5 4      | 1E+08    | 1E+08    | Gm10600   | predicted gene 10600                                                            |
| TC02000044 | 0.071603 | 2.46668 | RHEB_cKO up vs WT | 1.30257 +6σ | 2 E5 2      | 78390    | 78390    | Pla2g4d   | phospholipase A2, group IVD                                                     |
| TC13000001 | 0.010905 | 2.45669 | RHEB_cKO up vs WT | 1.29671 +6σ | 13 A3.1 1:  | 665622   | 665622   | Hist1h2br | histone cluster 1 H2br                                                          |
| TC03000014 | 0.037614 | 2.45515 | RHEB_cKO up vs WT | 1.29581 +6σ | 3 H2 3 72:  | 22262    | 22262    | Uox       | urate oxidase                                                                   |
| TC10000012 | 0.005967 | 2.45345 | RHEB_cKO up vs WT | 1.29481 +6σ | ---         | ---      | ---      | Gm15664   | predicted gene 15664                                                            |
| TC14000007 | 0.010926 | 2.44895 | RHEB_cKO up vs WT | 1.29216 +6σ | 14 14 C1    | 57260    | 57260    | Ltb4r2    | leukotriene B4 receptor 2                                                       |

|            |          |         |                   |         |     |             |          |          |           |                                                                                    |
|------------|----------|---------|-------------------|---------|-----|-------------|----------|----------|-----------|------------------------------------------------------------------------------------|
| TC0700002C | 0.108219 | 2.44806 | RHEB_cKO up vs WT | 1.29164 | +6σ | ---         | ---      | ---      | Gm26143   | predicted gene, 26143                                                              |
| TC01000034 | 0.086204 | 2.44491 | RHEB_cKO up vs WT | 1.28978 | +6σ | 1 H2.2 1 7  | 11931    | 11931    | Atp1b1    | ATPase, Na <sup>+</sup> /K <sup>+</sup> transporting, beta 1 polypeptide           |
| TC1500001E | 0.039124 | 2.43971 | RHEB_cKO up vs WT | 1.28671 | +6σ | 15 15 20.6  | 1.01E+08 | 1.01E+08 | Gm19551   | predicted gene, 19551                                                              |
| TC02000041 | 0.046132 | 2.43665 | RHEB_cKO up vs WT | 1.2849  | +6σ | ---         | ---      | ---      | Gm13805   | predicted gene 13805                                                               |
| TC07000007 | 0.273927 | 2.4361  | RHEB_cKO up vs WT | 1.28457 | +6σ | 7 B4 7 28.  | 13646    | 13646    | Klk1b22   | kallikrein 1-related peptidase b22                                                 |
| TC18000014 | 0.001773 | 2.42948 | RHEB_cKO up vs WT | 1.28065 | +6σ | 18 E1 18    | 54670    | 54670    | Atp8b1    | ATPase, class I, type 8B, member 1                                                 |
| TC14000003 | 0.034239 | 2.42672 | RHEB_cKO up vs WT | 1.27901 | +6σ | 14 B 14 20  | 11752    | 11752    | Anxa8     | annexin A8                                                                         |
| TC11000004 | 0.008333 | 2.42292 | RHEB_cKO up vs WT | 1.27675 | +6σ | ---         | ---      | ---      | Gm12141   | predicted gene 12141                                                               |
| TC01000032 | 0.041196 | 2.41742 | RHEB_cKO up vs WT | 1.27347 | +6σ | 1 H1 1 65.  | 16782    | 16782    | Lamc2     | laminin, gamma 2                                                                   |
| TC0700002E | 6.03E-05 | 2.41237 | RHEB_cKO up vs WT | 1.27045 | +6σ | 7 A3 7 9.9  | 12051    | 12051    | Bcl3      | B cell leukemia/lymphoma 3                                                         |
| TC1000000C | 0.006142 | 2.39678 | RHEB_cKO up vs WT | 1.2611  | +6σ | X E3 X 56.  | 30058    | 30058    | Timm8a1   | translocase of inner mitochondrial membrane 8A1                                    |
| TC1500001C | 0.005366 | 2.39656 | RHEB_cKO up vs WT | 1.26096 | +6σ | 15 F1 15    | 239667   | 239667   | Dip2b     | disco interacting protein 2 homolog B                                              |
| TC05000017 | 0.008142 | 2.39453 | RHEB_cKO up vs WT | 1.25974 | +6σ | 5 G2 5 81.  | 14086    | 14086    | Fscn1     | fascin actin-bundling protein 1                                                    |
| TC09000004 | 0.009998 | 2.38879 | RHEB_cKO up vs WT | 1.25628 | +6σ | 9 9 B       | 58235    | 58235    | Pvrl1     | poliovirus receptor-related 1                                                      |
| TC0800001E | 0.003855 | 2.38599 | RHEB_cKO up vs WT | 1.25459 | +6σ | 8 A3 8      | 67920    | 67920    | Mak16     | MAK16 homolog                                                                      |
| TC0X00001E | 0.006736 | 2.38293 | RHEB_cKO up vs WT | 1.25274 | +6σ | X F3 X      | 56360    | 56360    | Acot9     | acyl-CoA thioesterase 9                                                            |
| TC0X000032 | 0.000221 | 2.38043 | RHEB_cKO up vs WT | 1.25122 | +6σ | ---         | ---      | ---      | Gm15242   | predicted gene 15242                                                               |
| TC09000002 | 0.000883 | 2.37946 | RHEB_cKO up vs WT | 1.25064 | +6σ | 9 A3 9 7.8  | 16835    | 16835    | Ldlr      | low density lipoprotein receptor                                                   |
| TC0X000034 | 0.011013 | 2.3746  | RHEB_cKO up vs WT | 1.24768 | +6σ | X D X 43.9  | 16186    | 16186    | Il2rg     | interleukin 2 receptor, gamma chain                                                |
| TC0500000E | 0.006214 | 2.37218 | RHEB_cKO up vs WT | 1.24621 | +6σ | 5 C3.2 5    | 231287   | 231287   | Atp10d    | ATPase, class V, type 10D                                                          |
| TC0300000E | 0.006331 | 2.36885 | RHEB_cKO up vs WT | 1.24419 | +6σ | 3 F1-F2 3   | 20194    | 20194    | S100a10   | S100 calcium binding protein A10 (calpactin)                                       |
| TC14000001 | 0.004403 | 2.36291 | RHEB_cKO up vs WT | 1.24056 | +6σ | 14 A2 14    | 218756   | 218756   | Slc4a7    | solute carrier family 4, sodium bicarbonate cotransporter, member 7                |
| TC06000024 | 0.008184 | 2.35803 | RHEB_cKO up vs WT | 1.23758 | +6σ | 6 C1 6      | 232087   | 232087   | Mat2a     | methionine adenosyltransferase II, alpha                                           |
| TC02000051 | 0.012744 | 2.357   | RHEB_cKO up vs WT | 1.23695 | +6σ | 2 H 2       | 20568    | 20568    | Slpi      | secretory leukocyte peptidase inhibitor                                            |
| TC0X000003 | 0.009719 | 2.35554 | RHEB_cKO up vs WT | 1.23606 | +6σ | X A3.3 X 2  | 16164    | 16164    | Il13ra1   | interleukin 13 receptor, alpha 1                                                   |
| TC1100001E | 0.020165 | 2.35227 | RHEB_cKO up vs WT | 1.23406 | +6σ | 11 E2 11 8  | 192897   | 192897   | Itgb4     | integrin beta 4                                                                    |
| TC08000002 | 0.002577 | 2.35209 | RHEB_cKO up vs WT | 1.23394 | +6σ | 8 A1.3 8    | 654455   | 654455   | Gm21944   | defensin beta 48 pseudogene                                                        |
| TC1400000C | 0.002156 | 2.35045 | RHEB_cKO up vs WT | 1.23294 | +6σ | 14 A1 14    | 286940   | 286940   | Flnb      | filamin, beta                                                                      |
| TC1200000E | 0.08041  | 2.33112 | RHEB_cKO up vs WT | 1.22103 | +6σ | 12 D2 12    | 14281    | 14281    | Fos       | FBJ osteosarcoma oncogene                                                          |
| TC09000007 | 0.006    | 2.32941 | RHEB_cKO up vs WT | 1.21996 | +6σ | 9 B 9 32.0  | 18746    | 18746    | Pkm       | pyruvate kinase, muscle                                                            |
| TC0900000E | 0.016451 | 2.32839 | RHEB_cKO up vs WT | 1.21934 | +6σ | ---         | ---      | ---      | Gm22571   | predicted gene, 22571                                                              |
| TC12000012 | 0.012503 | 2.3278  | RHEB_cKO up vs WT | 1.21897 | +6σ | 12 F1 12 6  | 68337    | 68337    | Crip2     | cysteine rich protein 2                                                            |
| TC15000011 | 0.020176 | 2.32714 | RHEB_cKO up vs WT | 1.21856 | +6σ | 15 A1 15    | 18414    | 18414    | Osmr      | oncostatin M receptor                                                              |
| TC0400003E | 0.010512 | 2.32374 | RHEB_cKO up vs WT | 1.21645 | +6σ | 4 E1 4 74.  | 27984    | 27984    | Efh2      | EF hand domain containing 2                                                        |
| TC0300001E | 0.009815 | 2.32354 | RHEB_cKO up vs WT | 1.21632 | +6σ | 3 B 3 17.4  | 11747    | 11747    | Anxa5     | annexin A5                                                                         |
| TC16000017 | 0.001758 | 2.31904 | RHEB_cKO up vs WT | 1.21353 | +6σ | 16 16 C1.2  | 80859    | 80859    | Nfkbiz    | nuclear factor of kappa light polypeptide gene enhancer in B cells inhibitor, zeta |
| TC0700003E | 0.038471 | 2.31636 | RHEB_cKO up vs WT | 1.21186 | +6σ | 7 D3 7      | 12173    | 12173    | Bnc1      | basonuclin 1                                                                       |
| TC06000001 | 0.002841 | 2.31191 | RHEB_cKO up vs WT | 1.20908 | +6σ | 6 A3.1 6    | 19283    | 19283    | Ptprz1    | protein tyrosine phosphatase, receptor type Z, polypeptide 1                       |
| TC1200001E | 0.009546 | 2.31085 | RHEB_cKO up vs WT | 1.20843 | +6σ | 12 F2 12 6  | 52635    | 52635    | Esyt2     | extended synaptotagmin-like protein 2                                              |
| TC09000022 | 0.002557 | 2.31073 | RHEB_cKO up vs WT | 1.20835 | +6σ | 9 A5.3 9    | 244871   | 244871   | Zc3h12c   | zinc finger CCCH type containing 12C                                               |
| TC1900001E | 0.024585 | 2.31065 | RHEB_cKO up vs WT | 1.2083  | +6σ | 19 D1 19    | 12821    | 12821    | Col17a1   | collagen, type XVII, alpha 1                                                       |
| TC04000034 | 0.000176 | 2.30911 | RHEB_cKO up vs WT | 1.20734 | +6σ | 4 D2.2 4    | 442834   | 442834   | D830031N  | RIKEN cDNA D830031N03 gene                                                         |
| TC0200004E | 0.00019  | 2.30822 | RHEB_cKO up vs WT | 1.20678 | +6σ | 2 F1 2      | 269356   | 269356   | Slc4a11   | solute carrier family 4, sodium bicarbonate transporter-like, member 11            |
| TC17000002 | 0.01256  | 2.30802 | RHEB_cKO up vs WT | 1.20666 | +6σ | 17 A3.2 17  | 75202    | 75202    | Spaca6    | sperm acrosome associated 6                                                        |
| TC1300001E | 0.008763 | 2.29914 | RHEB_cKO up vs WT | 1.2011  | +6σ | 13 A3.1 13  | 665596   | 665596   | Hist1h2bq | histone cluster 1, H2bq                                                            |
| TC0300003C | 0.000417 | 2.29094 | RHEB_cKO up vs WT | 1.19594 | +6σ | 3 G3 3      | 75624    | 75624    | Metap1    | methionyl aminopeptidase 1                                                         |
| TC01000034 | 0.010828 | 2.28852 | RHEB_cKO up vs WT | 1.19442 | +6σ | 1 H2.3 1    | 80914    | 80914    | Uck2      | uridine-cytidine kinase 2                                                          |
| TC0600000E | 0.003826 | 2.28682 | RHEB_cKO up vs WT | 1.19334 | +6σ | 6 B3 6 25.  | 1.03E+08 | 1.03E+08 | Halr1     | Hoxa adjacent long noncoding RNA 1                                                 |
| TC17000014 | 0.166592 | 2.28502 | RHEB_cKO up vs WT | 1.19221 | +6σ | 17 A3-B 17  | 21826    | 21826    | Thbs2     | thrombospondin 2                                                                   |
| TC15000004 | 0.004028 | 2.28498 | RHEB_cKO up vs WT | 1.19218 | +6σ | 15 D2-D3    | 17869    | 17869    | Myc       | myelocytomatosis oncogene                                                          |
| TC1900001C | 0.00038  | 2.28278 | RHEB_cKO up vs WT | 1.19079 | +6σ | 19 A 19     | 56613    | 56613    | Rps6ka4   | ribosomal protein S6 kinase, polypeptide 4                                         |
| TC06000001 | 0.018203 | 2.28167 | RHEB_cKO up vs WT | 1.19009 | +6σ | 6 6 A2      | 12390    | 12390    | Cav2      | caveolin 2                                                                         |
| TC0400002E | 0.002033 | 2.27048 | RHEB_cKO up vs WT | 1.183   | +6σ | 4 B1 4      | 22004    | 22004    | Tpm2      | tropomyosin 2, beta                                                                |
| TC01000027 | 0.013046 | 2.26745 | RHEB_cKO up vs WT | 1.18107 | +6σ | 1 D 1 43.9  | 17975    | 17975    | Ncl       | nucleolin                                                                          |
| TC19000004 | 0.152721 | 2.26732 | RHEB_cKO up vs WT | 1.18099 | +6σ | 19 C1 19 2  | 23972    | 23972    | Paps2     | 3'-phosphoadenosine 5'-phosphosulfate synthase 2                                   |
| TC07000041 | 0.008662 | 2.26426 | RHEB_cKO up vs WT | 1.17904 | +6σ | 7 F2 7      | 66922    | 66922    | Rras2     | related RAS viral (r-ras) oncogene 2                                               |
| TC0500001E | 0.004909 | 2.25272 | RHEB_cKO up vs WT | 1.17167 | +6σ | 5 G2 5 76.  | 26433    | 26433    | Plod3     | procollagen-lysine, 2-oxoglutarate 5-dioxygenase 3                                 |
| TC0600001E | 0.032433 | 2.24876 | RHEB_cKO up vs WT | 1.16913 | +6σ | 6 6 8.16 cl | 1.01E+08 | 1.01E+08 | Gm20186   | predicted gene, 20186                                                              |
| TC08000011 | 0.004625 | 2.24718 | RHEB_cKO up vs WT | 1.16812 | +6σ | 8 D1 8 47.  | 14766    | 14766    | Adgrg1    | adhesion G protein-coupled receptor G1                                             |
| TC0X000032 | 0.000395 | 2.24578 | RHEB_cKO up vs WT | 1.16722 | +6σ | X F3-F4 X   | 20229    | 20229    | Sat1      | spermidine/spermine N1-acetyl transferase 1                                        |
| TC07000017 | 0.119358 | 2.23776 | RHEB_cKO up vs WT | 1.16205 | +6σ | 7 F2 7 65.1 | 20278    | 20278    | Scnn1g    | sodium channel, nonvoltage-gated 1 gamma                                           |
| TC02000032 | 0.001076 | 2.23522 | RHEB_cKO up vs WT | 1.16042 | +6σ | 2 B 2 21.7  | 64292    | 64292    | Ptges     | prostaglandin E synthase                                                           |
| TC09000021 | 0.008606 | 2.22946 | RHEB_cKO up vs WT | 1.1567  | +6σ | 9 A5.1 9 2  | 102644   | 102644   | Oaf       | out at first homolog                                                               |
| TC0400001E | 0.000614 | 2.22912 | RHEB_cKO up vs WT | 1.15648 | +6σ | 4 E2 4      | 20810    | 20810    | Srm       | spermidine synthase                                                                |
| TC1900001E | 0.001374 | 2.22664 | RHEB_cKO up vs WT | 1.15487 | +6σ | 19 C3 19    | 107094   | 107094   | Rrp12     | ribosomal RNA processing 12 homolog (S. cerevisiae)                                |
| TC0X00000E | 0.010931 | 2.22379 | RHEB_cKO up vs WT | 1.15302 | +6σ | ---         | ---      | ---      | Gm14788   | predicted gene 14788                                                               |
| TC0900000E | 0.012828 | 2.22365 | RHEB_cKO up vs WT | 1.15293 | +6σ | 9 A5.3 9    | 67834    | 67834    | Idh3a     | isocitrate dehydrogenase 3 (NAD <sup>+</sup> ) alpha                               |
| TC03000001 | 0.013558 | 2.22192 | RHEB_cKO up vs WT | 1.15181 | +6σ | ---         | ---      | ---      | Gm5844    | predicted gene 5844                                                                |
| TC1500001C | 0.000643 | 2.22023 | RHEB_cKO up vs WT | 1.15071 | +6σ | 15 F2 15    | 432986   | 432986   | Gm5477    | type II keratin Kb16P                                                              |
| TC02000011 | 0.034249 | 2.21384 | RHEB_cKO up vs WT | 1.14655 | +6σ | ---         | ---      | ---      | Gm13669   | predicted gene 13669                                                               |
| TC1300000E | 0.009522 | 2.20953 | RHEB_cKO up vs WT | 1.14374 | +6σ | 13 B1 13 2  | 70930    | 70930    | Nol8      | nucleolar protein 8                                                                |
| TC0700000C | 0.017956 | 2.20551 | RHEB_cKO up vs WT | 1.14111 | +6σ | 7 A1 7 1.9  | 50918    | 50918    | Myadm     | myeloid-associated differentiation marker                                          |
| TC0200000E | 0.018738 | 2.20338 | RHEB_cKO up vs WT | 1.13972 | +6σ | 2 2 C3      | 227937   | 227937   | Pkp4      | plakophilin 4                                                                      |
| TC09000014 | 0.005045 | 2.20335 | RHEB_cKO up vs WT | 1.1397  | +6σ | 9 F2 9      | 23918    | 23918    | Impdh2    | inosine 5'-phosphate dehydrogenase 2                                               |
| TC1700002E | 0.011561 | 2.20033 | RHEB_cKO up vs WT | 1.13772 | +6σ | 17 E4 17    | 12193    | 12193    | Zfp3612   | zinc finger protein 36, C3H type-like 2                                            |
| TC0900000E | 0.048908 | 2.20029 | RHEB_cKO up vs WT | 1.13769 | +6σ | 9 C 9       | 76459    | 76459    | Car12     | carbonic anhydrase 12                                                              |
| TC09000027 | 0.005036 | 2.19655 | RHEB_cKO up vs WT | 1.13524 | +6σ | 9 E1 9 44.1 | 15551    | 15551    | Htr1b     | 5-hydroxytryptamine (serotonin) receptor 1B                                        |
| TC18000014 | 0.186351 | 2.19445 | RHEB_cKO up vs WT | 1.13386 | +6σ | 18 E1 18    | 408198   | 408198   | Spink7    | serine peptidase inhibitor, Kazal type 7 (putative)                                |
| TC0200002C | 0.00059  | 2.19416 | RHEB_cKO up vs WT | 1.13367 | +6σ | 2 F1 2      | 228608   | 228608   | Smox      | spermine oxidase                                                                   |
| TC05000021 | 0.003034 | 2.19378 | RHEB_cKO up vs WT | 1.13342 | +6σ | 5 B1 5 17.  | 14208    | 14208    | Ppm1g     | protein phosphatase 1G (formerly 2C), magnesium-dependent, gamma isoform           |
| TC07000027 | 0.006303 | 2.19359 | RHEB_cKO up vs WT | 1.13329 | +6σ | 7 B1 7 17.  | 12336    | 12336    | Capns1    | calpain, small subunit 1                                                           |
| TC0X000007 | 0.022173 | 2.18835 | RHEB_cKO up vs WT | 1.12985 | +6σ | X A7.3 X    | 245474   | 245474   | Dkc1      | dyskeratosis congenita 1, dyskerin                                                 |
| TC0Y000002 | 0.36544  | 2.18605 | RHEB_cKO up vs WT | 1.12832 | +6σ | ---         | ---      | ---      | Gm21742   | predicted gene, 21742                                                              |
| TC17000027 | 0.000382 | 2.1846  | RHEB_cKO up vs WT | 1.12737 | +6σ | 11 E1 11    | 16647    | 16647    | Kpna2     | karyopherin (importin) alpha 2                                                     |
| TC18000011 | 0.021829 | 2.18235 | RHEB_cKO up vs WT | 1.12588 | +6σ | 18 B3 18    | 72512    | 72512    | Tmem173   | transmembrane protein 173                                                          |
| TC0700001C | 0.015451 | 2.18181 | RHEB_cKO up vs WT | 1.12553 | +6σ | ---         | ---      | ---      | Kansl2-ps | KAT8 regulatory NSL complex subunit 2, pseudogene                                  |
| TC0X00000E | 0.010352 | 2.18179 | RHEB_cKO up vs WT | 1.12551 | +6σ | X C3 X      | 17698    | 17698    | Msn       | moesin                                                                             |
| TC01000004 | 0.010265 | 2.18136 | RHEB_cKO up vs WT | 1.12523 | +6σ | 1 C1.3 1    | 55989    | 55989    | Nop58     | NOP58 ribonucleoprotein                                                            |
| TC03000022 | 0.003023 | 2.18113 | RHEB_cKO up vs WT | 1.12508 | +6σ | ---         | ---      | ---      | Gm3788    | predicted gene 3788                                                                |

|            |          |         |                   |             |            |        |        |          |                                                                     |
|------------|----------|---------|-------------------|-------------|------------|--------|--------|----------|---------------------------------------------------------------------|
| TC17000025 | 0.00502  | 2.17687 | RHEB_cKO up vs WT | 1.12226 +6σ | 17 E3 17   | 260409 | 260409 | Cdc42ep3 | CDC42 effector protein (Rho GTPase binding) 3                       |
| TC09000026 | 7.27E-06 | 2.17452 | RHEB_cKO up vs WT | 1.1207 +6σ  | 9 D 9 42.3 | 50772  | 50772  | Mapk6    | mitogen-activated protein kinase 6                                  |
| TC08000006 | 0.019563 | 2.17224 | RHEB_cKO up vs WT | 1.11919 +6σ | 8 B3.2 8   | 15446  | 15446  | Hpgd     | hydroxyprostaglandin dehydrogenase 15 (NAD)                         |
| TC11000011 | 0.014234 | 2.17019 | RHEB_cKO up vs WT | 1.11782 +6σ | ---        | ---    | ---    | Gm12346  | predicted gene 12346                                                |
| TC04000023 | 0.008556 | 2.16965 | RHEB_cKO up vs WT | 1.11746 +6σ | ---        | ---    | ---    | Gm11902  | predicted gene 11902                                                |
| TC19000009 | 0.009041 | 2.16955 | RHEB_cKO up vs WT | 1.1174 +6σ  | ---        | ---    | ---    | Gm8034   | predicted gene 8034                                                 |
| TC08000001 | 0.210172 | 2.16738 | RHEB_cKO up vs WT | 1.11595 +6σ | 8 A1.3 8   | 116746 | 116746 | Defb6    | defensin beta 6                                                     |
| TC06000022 | 0.004977 | 2.16498 | RHEB_cKO up vs WT | 1.11435 +6σ | 6 6 B3     | 71720  | 71720  | Osbp13   | oxysterol binding protein-like 3                                    |
| TC03000027 | 0.002386 | 2.16494 | RHEB_cKO up vs WT | 1.11433 +6σ | 3 F2.3 3 4 | 99738  | 99738  | Kcnc4    | potassium voltage gated channel, Shaw-related subfamily, member 4   |
| TC0X000017 | 0.004594 | 2.15963 | RHEB_cKO up vs WT | 1.11078 +6σ | ---        | ---    | ---    | Gm14373  | predicted gene 14373                                                |
| TC06000028 | 0.002428 | 2.15571 | RHEB_cKO up vs WT | 1.10816 +6σ | ---        | ---    | ---    | Gm16433  | predicted gene 16433                                                |
| TC08000009 | 0.001099 | 2.15474 | RHEB_cKO up vs WT | 1.10752 +6σ | 8 8        | 723960 | 723960 | Mir24-2  | microRNA 24-2                                                       |
| TC02000035 | 0.023976 | 2.15374 | RHEB_cKO up vs WT | 1.10685 +6σ | ---        | ---    | ---    | Gm13487  | predicted gene 13487                                                |
| TC08000010 | 0.014473 | 2.15308 | RHEB_cKO up vs WT | 1.1064 +6σ  | 8 C5 8 46. | 17748  | 17748  | Mt1      | metallothionein 1                                                   |
| TC01000024 | 0.007174 | 2.15305 | RHEB_cKO up vs WT | 1.10638 +6σ | 1 1 C1-C3  | 93691  | 93691  | Klf7     | Kruppel-like factor 7 (ubiquitous)                                  |
| TC07000025 | 0.002915 | 2.15068 | RHEB_cKO up vs WT | 1.10479 +6σ | 7 A3 7 9.9 | 52118  | 52118  | Pvr      | poliovirus receptor                                                 |
| TC05000000 | 0.00137  | 2.14988 | RHEB_cKO up vs WT | 1.10425 +6σ | ---        | ---    | ---    | Gm26825  | predicted gene, 26825                                               |
| TC10000012 | 0.011318 | 2.14347 | RHEB_cKO up vs WT | 1.09995 +6σ | 10 D1 10   | 237542 | 237542 | Osbp18   | oxysterol binding protein-like 8                                    |
| TC16000004 | 0.005072 | 2.14145 | RHEB_cKO up vs WT | 1.09859 +6σ | 16 B3 16 2 | 22042  | 22042  | Tfrc     | transferrin receptor                                                |
| TC09000016 | 0.031583 | 2.1399  | RHEB_cKO up vs WT | 1.09755 +6σ | 9 F4 9     | 319626 | 319626 | 95300590 | RIKEN cDNA 9530059014 gene                                          |
| TC01000002 | 0.000911 | 2.13783 | RHEB_cKO up vs WT | 1.09614 +6σ | 1 B 1      | 226971 | 226971 | Plekhh2  | pleckstrin homology domain containing, family B (evectins) member 2 |
| TC10000017 | 0.007113 | 2.1368  | RHEB_cKO up vs WT | 1.09545 +6σ | ---        | ---    | ---    | Gm8355   | predicted pseudogene 8355                                           |
| TC14000012 | 0.003423 | 2.13597 | RHEB_cKO up vs WT | 1.09489 +6σ | ---        | ---    | ---    | Tpm3-rs7 | tropomyosin 3, related sequence 7                                   |
| TC03000006 | 0.042616 | 2.13398 | RHEB_cKO up vs WT | 1.09355 +6σ | ---        | ---    | ---    | Gm25188  | predicted gene, 25188                                               |
| TC03000010 | 0.002299 | 2.13389 | RHEB_cKO up vs WT | 1.09349 +6σ | 3 F2.2 3 4 | 18049  | 18049  | Ngf      | nerve growth factor                                                 |
| TC15000010 | 0.011517 | 2.13315 | RHEB_cKO up vs WT | 1.09299 +6σ | 15 F1 15   | 207214 | 207214 | Larp4    | La ribonucleoprotein domain family, member 4                        |
| TC08000004 | 0.003808 | 2.12944 | RHEB_cKO up vs WT | 1.09048 +6σ | ---        | ---    | ---    | Gm6180   | predicted pseudogene 6180                                           |
| TC04000026 | 0.001297 | 2.12861 | RHEB_cKO up vs WT | 1.08991 +6σ | 4 B1 4     | 381605 | 381605 | Tbc1d2   | TBC1 domain family, member 2                                        |
| TC04000036 | 0.001526 | 2.12789 | RHEB_cKO up vs WT | 1.08943 +6σ | 4 D2.2 4   | 230779 | 230779 | Serinc2  | serine incorporator 2                                               |
| TC02000015 | 0.007555 | 2.12606 | RHEB_cKO up vs WT | 1.08818 +6σ | 2 F3 2     | 20017  | 20017  | Polr1b   | polymerase (RNA) I polypeptide B                                    |
| TC0X000004 | 0.006711 | 2.12255 | RHEB_cKO up vs WT | 1.0858 +6σ  | ---        | ---    | ---    | Gm14584  | predicted gene 14584                                                |
| TC03000017 | 0.000314 | 2.1215  | RHEB_cKO up vs WT | 1.08509 +6σ | 11 E1 11   | 16647  | 16647  | Kpna2    | karyopherin (importin) alpha 2                                      |
| TC15000023 | 0.012999 | 2.12106 | RHEB_cKO up vs WT | 1.08479 +6σ | 15 D3 15 3 | 18810  | 18810  | Plec     | plectin                                                             |
| TC06000016 | 0.022411 | 2.12069 | RHEB_cKO up vs WT | 1.08454 +6σ | 6 G1 6 66. | 13730  | 13730  | Emp1     | epithelial membrane protein 1                                       |
| TC10000004 | 0.00077  | 2.12044 | RHEB_cKO up vs WT | 1.08436 +6σ | 10 B2-B3   | 19072  | 19072  | Prep     | prolyl endopeptidase                                                |
| TC06000030 | 0.000378 | 2.11745 | RHEB_cKO up vs WT | 1.08233 +6σ | 6 F1 6     | 111173 | 111173 | Erc1     | ELKS/RAB6-interacting/CAST family member 1                          |
| TC09000028 | 0.02476  | 2.11655 | RHEB_cKO up vs WT | 1.08171 +6σ | 9 E3.3 9 5 | 11933  | 11933  | Atp1b3   | ATPase, Na+/K+ transporting, beta 3 polypeptide                     |
| TC13000000 | 0.002088 | 2.11484 | RHEB_cKO up vs WT | 1.08055 +6σ | 13 A1 13   | 23849  | 23849  | Klf6     | Kruppel-like factor 6                                               |
| TC17000024 | 0.017475 | 2.11197 | RHEB_cKO up vs WT | 1.07859 +6σ | 17 E1.1 17 | 106572 | 106572 | Rab31    | RAB31, member RAS oncogene family                                   |
| TC08000025 | 0.002022 | 2.11168 | RHEB_cKO up vs WT | 1.07839 +6σ | 8 C 8      | 24015  | 24015  | Abce1    | ATP-binding cassette, sub-family E (OABP), member 1                 |
| TC14000021 | 0.005201 | 2.10994 | RHEB_cKO up vs WT | 1.0772 +6σ  | 14 14 C1   | 56532  | 56532  | Ripk3    | receptor-interacting serine-threonine kinase 3                      |
| TC07000026 | 0.081052 | 2.10818 | RHEB_cKO up vs WT | 1.076 +6σ   | 7 A3 7     | 72383  | 72383  | Cnfn     | cornifelin                                                          |
| TC07000003 | 0.003999 | 2.10728 | RHEB_cKO up vs WT | 1.07538 +6σ | 7 A3 7     | 18793  | 18793  | Plaur    | plasminogen activator, urokinase receptor                           |
| TC02000007 | 0.006273 | 2.10114 | RHEB_cKO up vs WT | 1.07117 +6σ | ---        | ---    | ---    | Gm13588  | predicted gene 13588                                                |
| TC02000041 | 0.072358 | 2.1     | RHEB_cKO up vs WT | 1.07039 +6σ | ---        | ---    | ---    | Gm13797  | predicted gene 13797                                                |
| TC02000041 | 0.006381 | 2.09929 | RHEB_cKO up vs WT | 1.0699 +6σ  | ---        | ---    | ---    | Gm10800  | predicted gene 10800                                                |
| TC19000000 | 0.000312 | 2.09896 | RHEB_cKO up vs WT | 1.06968 +6σ | 19 B1-3 19 | 19697  | 19697  | Rela     | v-rel reticuloendotheliosis viral oncogene homolog A (avian)        |
| TC02000025 | 0.023779 | 2.09853 | RHEB_cKO up vs WT | 1.06938 +6σ | 2 A1 2     | 170768 | 170768 | Pfkfb3   | 6-phosphofructo-2-kinase/fructose-2,6-biphosphatase 3               |
| TC15000017 | 0.000651 | 2.0954  | RHEB_cKO up vs WT | 1.06723 +6σ | 15 D3 15 3 | 12181  | 12181  | Bop1     | block of proliferation 1                                            |
| TC05000000 | 0.012228 | 2.09439 | RHEB_cKO up vs WT | 1.06653 +6σ | 5 A2-A3 5  | 12571  | 12571  | Cdk6     | cyclin-dependent kinase 6                                           |
| TC0X000024 | 0.038167 | 2.09346 | RHEB_cKO up vs WT | 1.06589 +6σ | X A7.3 X 3 | 192176 | 192176 | Flna     | filamin, alpha                                                      |
| TC04000032 | 0.006253 | 2.09288 | RHEB_cKO up vs WT | 1.06549 +6σ | ---        | ---    | ---    | Gm20731  | predicted gene, 20731                                               |
| TC05000021 | 0.014558 | 2.09075 | RHEB_cKO up vs WT | 1.06402 +6σ | 5 B1 5     | 68567  | 68567  | Cgref1   | cell growth regulator with EF hand domain 1                         |
| TC05000004 | 0.007984 | 2.09062 | RHEB_cKO up vs WT | 1.06393 +6σ | ---        | ---    | ---    | Gm7816   | predicted pseudogene 7816                                           |
| TC11000036 | 0.004928 | 2.08952 | RHEB_cKO up vs WT | 1.06317 +6σ | 11 D 11 5  | 140486 | 140486 | Igf2bp1  | insulin-like growth factor 2 mRNA binding protein 1                 |
| TC05000015 | 0.010485 | 2.08839 | RHEB_cKO up vs WT | 1.06239 +6σ | ---        | ---    | ---    | Gm15459  | predicted gene 15459                                                |
| TC19000014 | 0.008358 | 2.08829 | RHEB_cKO up vs WT | 1.06232 +6σ | 19 C3 19   | 57753  | 57753  | Noc3l    | NOC3 like DNA replication regulator                                 |
| TC14000014 | 0.058044 | 2.08734 | RHEB_cKO up vs WT | 1.06167 +6σ | 14 A1 14   | 13421  | 13421  | Dnase1l3 | deoxyribonuclease 1-like 3                                          |
| TC01000036 | 0.022822 | 2.08623 | RHEB_cKO up vs WT | 1.0609 +6σ  | 1 H4 1     | 11566  | 11566  | Adss     | adenylosuccinate synthetase, non muscle                             |
| TC16000007 | 6.24E-05 | 2.08416 | RHEB_cKO up vs WT | 1.05947 +6σ | 16 C1.2 16 | 224250 | 224250 | Cldnd1   | claudin domain containing 1                                         |
| TC12000017 | 0.000526 | 2.0807  | RHEB_cKO up vs WT | 1.05707 +6σ | 12 12 C    | 217578 | 217578 | Baz1a    | bromodomain adjacent to zinc finger domain 1A                       |
| TC02000036 | 0.003607 | 2.07733 | RHEB_cKO up vs WT | 1.05473 +6σ | 2 C3 2 34. | 16420  | 16420  | Itgb6    | integrin beta 6                                                     |
| TC19000013 | 0.008574 | 2.07549 | RHEB_cKO up vs WT | 1.05345 +6σ | 19 C1 19 2 | 52874  | 52874  | Pum3     | pumilio RNA-binding family member 3                                 |
| TC11000034 | 0.011285 | 2.07498 | RHEB_cKO up vs WT | 1.0531 +6σ  | 11 11 B5   | 56321  | 56321  | Aatf     | apoptosis antagonizing transcription factor                         |
| TC04000033 | 0.002314 | 2.07382 | RHEB_cKO up vs WT | 1.05229 +6σ | 4 D2.1 4   | 107995 | 107995 | Cdc20    | cell division cycle 20                                              |
| TC06000013 | 0.022103 | 2.0738  | RHEB_cKO up vs WT | 1.05228 +6σ | 6 F1 6 56. | 330409 | 330409 | Cecr2    | cat eye syndrome chromosome region, candidate 2                     |
| TC02000031 | 0.02012  | 2.07187 | RHEB_cKO up vs WT | 1.05093 +6σ | 2 A3 2 18. | 18128  | 18128  | Notch1   | notch 1                                                             |
| TC04000025 | 0.000776 | 2.07171 | RHEB_cKO up vs WT | 1.05082 +6σ | 4 C3 4 39. | 68268  | 68268  | Zdhhc21  | zinc finger, DHHC domain containing 21                              |
| TC05000015 | 0.003854 | 2.06626 | RHEB_cKO up vs WT | 1.04702 +6σ | ---        | ---    | ---    | Gm10108  | predicted pseudogene 10108                                          |
| TC08000025 | 0.012221 | 2.06593 | RHEB_cKO up vs WT | 1.04679 +6σ | 8 E1 8 57. | 101943 | 101943 | Sf3b3    | splicing factor 3b, subunit 3                                       |
| TC17000013 | 0.015053 | 2.06585 | RHEB_cKO up vs WT | 1.04674 +6σ | ---        | ---    | ---    | Gm5812   | predicted gene 5812                                                 |
| TC02000005 | 0.010166 | 2.06537 | RHEB_cKO up vs WT | 1.0464 +6σ  | 2 B 2      | 14299  | 14299  | Ncs1     | neuronal calcium sensor 1                                           |
| TC04000037 | 0.034485 | 2.06123 | RHEB_cKO up vs WT | 1.0435 +6σ  | 4 D3 4 67. | 230824 | 230824 | Grhl3    | grainyhead-like 3 (Drosophila)                                      |
| TC10000026 | 0.006193 | 2.05928 | RHEB_cKO up vs WT | 1.04214 +6σ | 10 C 10 41 | 12952  | 12952  | Cry1     | cryptochrome 1 (photolyase-like)                                    |
| TC01000004 | 0.004273 | 2.05901 | RHEB_cKO up vs WT | 1.04195 +6σ | 1 1 C2     | 66882  | 66882  | Bzw1     | basic leucine zipper and W2 domains 1                               |
| TC01000015 | 0.020418 | 2.05848 | RHEB_cKO up vs WT | 1.04158 +6σ | ---        | ---    | ---    | Gm15452  | predicted gene 15452                                                |
| TC03000009 | 0.039454 | 2.05819 | RHEB_cKO up vs WT | 1.04137 +6σ | ---        | ---    | ---    | Gm12428  | predicted gene 12428                                                |
| TC05000022 | 0.008231 | 2.05685 | RHEB_cKO up vs WT | 1.04043 +6σ | 5 B2 5     | 75416  | 75416  | Nop14    | NOP14 nucleolar protein                                             |
| TC19000004 | 0.006765 | 2.05557 | RHEB_cKO up vs WT | 1.03954 +6σ | 19 C1 19 2 | 16452  | 16452  | Jak2     | Janus kinase 2                                                      |
| TC09000025 | 0.022362 | 2.05467 | RHEB_cKO up vs WT | 1.03891 +6σ | 9 D 9      | 76886  | 76886  | Fam81a   | family with sequence similarity 81, member A                        |
| TC18000003 | 0.002458 | 2.05333 | RHEB_cKO up vs WT | 1.03796 +6σ | 18 C/D 18  | 13653  | 13653  | Egr1     | early growth response 1                                             |
| TC05000003 | 0.045454 | 2.05284 | RHEB_cKO up vs WT | 1.03762 +6σ | 5 B1 5     | 20537  | 20537  | Slc5a1   | solute carrier family 5 (sodium/glucose cotransporter), member 1    |
| TC12000013 | 0.001982 | 2.05214 | RHEB_cKO up vs WT | 1.03713 +6σ | 12 A1.1 1  | 11852  | 11852  | Rhob     | ras homolog family member B                                         |
| TC12000002 | 0.000822 | 2.0517  | RHEB_cKO up vs WT | 1.03682 +6σ | 12 A2 12   | 104943 | 104943 | Fam110c  | family with sequence similarity 110, member C                       |
| TC02000041 | 0.006701 | 2.05171 | RHEB_cKO up vs WT | 1.03682 +6σ | ---        | ---    | ---    | Gm13772  | predicted gene 13772                                                |
| TC18000010 | 0.076462 | 2.04962 | RHEB_cKO up vs WT | 1.03536 +6σ | 18 A2 18 1 | 13507  | 13507  | Dsc3     | desmocollin 3                                                       |
| TC16000001 | 0.039752 | 2.04925 | RHEB_cKO up vs WT | 1.0351 +6σ  | 16 A1 16 1 | 20583  | 20583  | Snai2    | snail family zinc finger 2                                          |
| TC19000007 | 0.002735 | 2.04903 | RHEB_cKO up vs WT | 1.03494 +6σ | 19 D2 19   | 67788  | 67788  | Sfr1     | SWI5 dependent recombination repair 1                               |
| TC01000016 | 0.003645 | 2.04877 | RHEB_cKO up vs WT | 1.03476 +6σ | 1 H3 1     | 236312 | 236312 | Pyhin1   | pyrin and HIN domain family, member 1                               |

|             |          |         |                   |              |            |        |        |          |                                                                             |
|-------------|----------|---------|-------------------|--------------|------------|--------|--------|----------|-----------------------------------------------------------------------------|
| TC01000013  | 0.04023  | 2.04818 | RHEB_cKO up vs WT | 1.03434 +6σ  | 1 F 1      | 1E+08  | 1E+08  | Gm15583  | predicted gene 15583                                                        |
| TC15000015  | 0.015386 | 2.04787 | RHEB_cKO up vs WT | 1.03412 +6σ  | 15 C 15 20 | 14042  | 14042  | Ext1     | exostoses (multiple) 1                                                      |
| TC01000006  | 0.027594 | 2.04611 | RHEB_cKO up vs WT | 1.03289 +6σ  | 1 C3 1     | 67534  | 67534  | Ttl4     | tubulin tyrosine ligase-like family, member 4                               |
| TC13000024  | 0.040958 | 2.04529 | RHEB_cKO up vs WT | 1.03231 +6σ  | X A2-A3.1  | 18824  | 18824  | Plp2     | proteolipid protein 2                                                       |
| TC11000005  | 0.003366 | 2.04496 | RHEB_cKO up vs WT | 1.03207 +6σ  | 11 B4 11 4 | 18432  | 18432  | Mybbp1a  | MYB binding protein (P160) 1a                                               |
| TC06000018  | 0.003665 | 2.04302 | RHEB_cKO up vs WT | 1.0307 +6σ   | 6 A1 6     | 27053  | 27053  | Asns     | asparagine synthetase                                                       |
| TC08000015  | 0.000955 | 2.04256 | RHEB_cKO up vs WT | 1.03038 +6σ  | 8 E1 8     | 22152  | 22152  | Tubb3    | tubulin, beta 3 class III                                                   |
| TC05000025  | 0.002114 | 2.04216 | RHEB_cKO up vs WT | 1.03009 +6σ  | 5 F 5      | 100608 | 100608 | Noc4l    | NOC4 like                                                                   |
| TC19000003  | 0.001038 | 2.04134 | RHEB_cKO up vs WT | 1.02952 +6σ  | 6 B2.3 6 2 | 13063  | 13063  | Cyca     | cytochrome c, somatic                                                       |
| TC06000008  | 0.007807 | 2.0403  | RHEB_cKO up vs WT | 1.02878 +6σ  | 6 C1 6 32. | 20019  | 20019  | Polr1a   | polymerase (RNA) I polypeptide A                                            |
| TC04000026  | 0.005491 | 2.03986 | RHEB_cKO up vs WT | 1.02847 +6σ  | ---        | ---    | ---    | Amd-ps4  | S-adenosylmethionine decarboxylase, pseudogene 4                            |
| TC03000002  | 0.002035 | 2.03958 | RHEB_cKO up vs WT | 1.02827 +6σ  | 3 3 B      | 76295  | 76295  | Atp11b   | ATPase, class VI, type 11B                                                  |
| TC02000018  | 0.000502 | 2.0387  | RHEB_cKO up vs WT | 1.02765 +6σ  | 2 F1 2     | 214968 | 214968 | Sema6d   | sema domain, transmembrane domain (TM), and cytoplasmic domain, (sema)      |
| TC10000000  | 0.093213 | 2.03868 | RHEB_cKO up vs WT | 1.02764 +6σ  | 10 A1 10   | 76142  | 76142  | Ppp1r14c | protein phosphatase 1, regulatory (inhibitor) subunit 14c                   |
| TC02000015  | 0.013934 | 2.03794 | RHEB_cKO up vs WT | 1.02711 +6σ  | 2 2 F3     | 67134  | 67134  | Nop56    | NOP56 ribonucleoprotein                                                     |
| TC10000030  | 0.025235 | 2.03461 | RHEB_cKO up vs WT | 1.02475 +6σ  | 10 D2 10   | 73914  | 73914  | Irak3    | interleukin-1 receptor-associated kinase 3                                  |
| TC05000027  | 0.010304 | 2.02945 | RHEB_cKO up vs WT | 1.02109 +3σ  | 5 E2 5     | 231452 | 231452 | Sdad1    | SDA1 domain containing 1                                                    |
| TC01000016  | 0.012304 | 2.02855 | RHEB_cKO up vs WT | 1.02045 +3σ  | 1 H3 1 79. | 21346  | 21346  | Tagln2   | transgelin 2                                                                |
| TC17000011  | 0.010006 | 2.02673 | RHEB_cKO up vs WT | 1.01915 +3σ  | 17 E1.3 17 | 72515  | 72515  | Wdr43    | WD repeat domain 43                                                         |
| TC17000004  | 0.004533 | 2.02507 | RHEB_cKO up vs WT | 1.01797 +3σ  | 17 A3.3 17 | 15361  | 15361  | Hmga1    | high mobility group AT-hook 1                                               |
| TC10000020  | 0.007253 | 2.02019 | RHEB_cKO up vs WT | 1.01449 +3σ  | 10 B1 10   | 1E+08  | 1E+08  | Amd2     | S-adenosylmethionine decarboxylase 2                                        |
| TC14000026  | 0.005114 | 2.02005 | RHEB_cKO up vs WT | 1.01439 +3σ  | 14 E2.2 14 | 72662  | 72662  | Dis3     | DIS3 homolog, exosome endoribonuclease and 3'-5' exoribonuclease            |
| TC0X000030  | 0.021409 | 2.01973 | RHEB_cKO up vs WT | 1.01416 +3σ  | ---        | ---    | ---    | Gm5762   | predicted gene 5762                                                         |
| TC09000024  | 0.006252 | 2.01958 | RHEB_cKO up vs WT | 1.01405 +3σ  | 9 D 9      | 17127  | 17127  | Smad3    | SMAD family member 3                                                        |
| TC08000025  | 0.014696 | 2.01785 | RHEB_cKO up vs WT | 1.01282 +3σ  | 8 E1 8 62. | 17132  | 17132  | Maf      | avian musculoaponeurotic fibrosarcoma oncogene homolog                      |
| TC07000020  | 0.00911  | 2.01654 | RHEB_cKO up vs WT | 1.01188 +3σ  | ---        | ---    | ---    | Gm15542  | predicted gene 15542                                                        |
| TC13000005  | 0.00117  | 2.01202 | RHEB_cKO up vs WT | 1.00865 +3σ  | 13 C3 13   | 80289  | 80289  | Lysmd3   | LysM, putative peptidoglycan-binding, domain containing 3                   |
| TC13000003  | 0.001698 | 2.01104 | RHEB_cKO up vs WT | 1.00794 +3σ  | ---        | ---    | ---    | Gm11366  | predicted gene 11366                                                        |
| TC0Y000002  | 0.373038 | 2.00844 | RHEB_cKO up vs WT | 1.00608 +3σ  | ---        | ---    | ---    | Gm21857  | predicted gene, 21857                                                       |
| TC10000007  | 0.003707 | 2.00564 | RHEB_cKO up vs WT | 1.00406 +3σ  | 10 B5.3-C1 | 110279 | 110279 | Bcr      | breakpoint cluster region                                                   |
| TC12000006  | 0.00091  | 2.00429 | RHEB_cKO up vs WT | 1.00309 +3σ  | 12 C3 12 3 | 15251  | 15251  | Hif1a    | hypoxia inducible factor 1, alpha subunit                                   |
| TC02000000  | 0.115277 | 2.00404 | RHEB_cKO up vs WT | 1.00291 +3σ  | 2 A1 2     | 74186  | 74186  | Ccdc3    | coiled-coil domain containing 3                                             |
| TC05000017  | 0.028417 | 2.00355 | RHEB_cKO up vs WT | 1.00256 +3σ  | 5 G2 5 81. | 17425  | 17425  | Foxk1    | forkhead box K1                                                             |
| TC02000024  | 0.00078  | 2.00231 | RHEB_cKO up vs WT | 1.00167 +3σ  | 2 H2-3 2 8 | 21969  | 21969  | Top1     | topoisomerase (DNA) I                                                       |
| TC07000002  | 0.000168 | 1.99666 | RHEB_cKO up vs WT | 0.997588 +3σ | 7 A3 7 9.6 | 13870  | 13870  | Erc1     | excision repair cross-complementing rodent repair deficiency, complementati |
| TC17000013  | 6.03E-05 | 1.99623 | RHEB_cKO up vs WT | 0.997281 +3σ | 17 E5 17   | 14236  | 14236  | Foxn2    | forkhead box N2                                                             |
| TC04000024  | 0.002517 | 1.99601 | RHEB_cKO up vs WT | 0.997118 +3σ | 4 A5 4     | 230082 | 230082 | Nol6     | nucleolar protein family 6 (RNA-associated)                                 |
| TC14000021  | 0.029665 | 1.99558 | RHEB_cKO up vs WT | 0.996806 +3σ | 14 D1-E1   | 14619  | 14619  | Gjb2     | gap junction protein, beta 2                                                |
| TC04000002  | 0.000735 | 1.99367 | RHEB_cKO up vs WT | 0.995425 +3σ | 4 A3 4     | 68493  | 68493  | Ndufaf4  | NADH dehydrogenase (ubiquinone) 1 alpha subcomplex, assembly factor 4       |
| TC16000016  | 0.017179 | 1.9936  | RHEB_cKO up vs WT | 0.995375 +3σ | 2 H1 2 76. | 269378 | 269378 | Ahcy     | S-adenosylhomocysteine hydrolase                                            |
| TC05000022  | 0.002576 | 1.99304 | RHEB_cKO up vs WT | 0.994971 +3σ | 5 B3 5 20. | 22388  | 22388  | Wdr1     | WD repeat domain 1                                                          |
| TC0M00000   | 0.00726  | 1.99284 | RHEB_cKO up vs WT | 0.994827 +3σ | ---        | ---    | ---    | mt-Ts2   | mitochondrially encoded tRNA serine 2                                       |
| TC15000017  | 0.000748 | 1.99085 | RHEB_cKO up vs WT | 0.993382 +3σ | ---        | ---    | ---    | Gm7935   | predicted pseudogene 7935                                                   |
| TC0X000015  | 0.095379 | 1.99066 | RHEB_cKO up vs WT | 0.993249 +3σ | ---        | ---    | ---    | Gm26652  | predicted gene, 26652                                                       |
| TC10000031  | 0.037007 | 1.99066 | RHEB_cKO up vs WT | 0.993245 +3σ | 10 D3 10   | 108037 | 108037 | Shmt2    | serine hydroxymethyltransferase 2 (mitochondrial)                           |
| TC10000011  | 0.019743 | 1.98946 | RHEB_cKO up vs WT | 0.992377 +3σ | 10 10 C3   | 67972  | 67972  | Atp2b1   | ATPase, Ca++ transporting, plasma membrane 1                                |
| TC16000014  | 0.015678 | 1.98943 | RHEB_cKO up vs WT | 0.992352 +3σ | 16 B1 16   | 210530 | 210530 | P3h2     | prolyl 3-hydroxylase 2                                                      |
| TC06000005  | 0.031064 | 1.98779 | RHEB_cKO up vs WT | 0.991168 +3σ | 6 D1 6 37. | 21802  | 21802  | Tgfa     | transforming growth factor alpha                                            |
| TC01000038  | 0.014654 | 1.98666 | RHEB_cKO up vs WT | 0.990347 +3σ | 1 H4 1 83. | 226747 | 226747 | Ahctf1   | AT hook containing transcription factor 1                                   |
| TC070000030 | 0.004794 | 1.98093 | RHEB_cKO up vs WT | 0.986181 +3σ | 7 B4 7     | 108961 | 108961 | E2f8     | E2F transcription factor 8                                                  |
| TC05000003  | 0.007578 | 1.97844 | RHEB_cKO up vs WT | 0.984361 +3σ | 5 B2 5 17. | 71729  | 71729  | Rgs12    | regulator of G-protein signaling 12                                         |
| TC11000022  | 0.011492 | 1.97769 | RHEB_cKO up vs WT | 0.983815 +3σ | 11 A2 11   | 66249  | 66249  | Pno1     | partner of NOB1 homolog                                                     |
| TC13000017  | 0.013558 | 1.97702 | RHEB_cKO up vs WT | 0.983325 +3σ | ---        | ---    | ---    | Gm11394  | predicted gene 11394                                                        |
| TC03000025  | 0.017202 | 1.97657 | RHEB_cKO up vs WT | 0.982998 +3σ | 3 G3 3     | 214133 | 214133 | Tet2     | tet methylcytosine dioxygenase 2                                            |
| TC09000022  | 0.012221 | 1.97651 | RHEB_cKO up vs WT | 0.982954 +3σ | 9 A5.3 9 2 | 235320 | 235320 | Zbtb16   | zinc finger and BTB domain containing 16                                    |
| TC11000036  | 0.010398 | 1.97468 | RHEB_cKO up vs WT | 0.981621 +3σ | 11 11 D    | 16211  | 16211  | Kpnb1    | karyopherin (importin) beta 1                                               |
| TC09000010  | 0.012676 | 1.97445 | RHEB_cKO up vs WT | 0.981452 +3σ | ---        | ---    | ---    | Gm9531   | predicted gene 9531                                                         |
| TC09000000  | 0.002286 | 1.97319 | RHEB_cKO up vs WT | 0.98053 +3σ  | ---        | ---    | ---    | Gm10718  | predicted gene 10718                                                        |
| TC07000007  | 0.003636 | 1.97305 | RHEB_cKO up vs WT | 0.980427 +3σ | ---        | ---    | ---    | Gm15470  | predicted gene 15470                                                        |
| TC15000023  | 0.010937 | 1.97144 | RHEB_cKO up vs WT | 0.979249 +3σ | 15 F3 15 5 | 16402  | 16402  | Itga5    | integrin alpha 5 (fibronectin receptor alpha)                               |
| TC0Y000002  | 0.425048 | 1.97142 | RHEB_cKO up vs WT | 0.979234 +3σ | X and Y X  | 17318  | 17318  | Mid1     | midline 1                                                                   |
| TC05000035  | 0.000504 | 1.97133 | RHEB_cKO up vs WT | 0.979168 +3σ | 5 G2 5     | 75788  | 75788  | Smurf1   | SMAD specific E3 ubiquitin protein ligase 1                                 |
| TC03000022  | 0.095164 | 1.96718 | RHEB_cKO up vs WT | 0.976127 +3σ | ---        | 19870  | 19870  | Snord73a | small nucleolar RNA, C/D box U73A                                           |
| TC07000004  | 0.04845  | 1.96688 | RHEB_cKO up vs WT | 0.975907 +3σ | 7 F5 7     | 66141  | 66141  | Ifitm3   | interferon induced transmembrane protein 3                                  |
| TC09000005  | 0.002074 | 1.96481 | RHEB_cKO up vs WT | 0.974387 +3σ | 9 A5.2 9 2 | 14012  | 14012  | Mpzl2    | myelin protein zero-like 2                                                  |
| TC18000005  | 0.00974  | 1.96267 | RHEB_cKO up vs WT | 0.972819 +3σ | 18 D1-D2   | 70425  | 70425  | Csnk1g3  | casein kinase 1, gamma 3                                                    |
| TC16000005  | 0.018017 | 1.96252 | RHEB_cKO up vs WT | 0.972706 +3σ | ---        | ---    | ---    | Gm23406  | predicted gene, 23406                                                       |
| TC02000026  | 0.010278 | 1.96108 | RHEB_cKO up vs WT | 0.97165 +3σ  | 2 2 H3-H4  | 21420  | 21420  | Tfap2c   | transcription factor AP-2, gamma                                            |
| TC10000018  | 0.01265  | 1.96057 | RHEB_cKO up vs WT | 0.971274 +3σ | 10 A3 10 8 | 21929  | 21929  | Tnfai3   | tumor necrosis factor, alpha-induced protein 3                              |
| TC07000034  | 0.037153 | 1.96042 | RHEB_cKO up vs WT | 0.971161 +3σ | 7 C 7      | 50794  | 50794  | Klf13    | Kruppel-like factor 13                                                      |
| TC10000013  | 0.002756 | 1.96006 | RHEB_cKO up vs WT | 0.970898 +3σ | 10 D1 10   | 21664  | 21664  | Phlda1   | pleckstrin homology like domain, family A, member 1                         |
| TC01000032  | 0.026861 | 1.95997 | RHEB_cKO up vs WT | 0.970835 +3σ | ---        | ---    | ---    | Gm7278   | predicted gene 7278                                                         |
| TC10000030  | 0.009574 | 1.9596  | RHEB_cKO up vs WT | 0.970562 +3σ | 10 10      | 791076 | 791076 | Mir763   | microRNA 763                                                                |
| TSUnmappe   | 0.009574 | 1.9596  | RHEB_cKO up vs WT | 0.970562 +3σ | 10 10      | 791076 | 791076 | Mir763   | microRNA 763                                                                |
| TC07000004  | 0.011468 | 1.95937 | RHEB_cKO up vs WT | 0.970392 +3σ | 7 F5 7 88. | 79202  | 79202  | Tnfrsf22 | tumor necrosis factor receptor superfamily, member 22                       |
| TC11000014  | 0.001682 | 1.95895 | RHEB_cKO up vs WT | 0.970082 +3σ | 11 D 11    | 98238  | 98238  | Lrrc59   | leucine rich repeat containing 59                                           |
| TC06000020  | 0.042003 | 1.95819 | RHEB_cKO up vs WT | 0.96952 +3σ  | 6 B1 6 17. | 78781  | 78781  | Zc3hav1  | zinc finger CCCH type, antiviral 1                                          |
| TC13000015  | 0.015841 | 1.95759 | RHEB_cKO up vs WT | 0.969076 +3σ | 13 A3.1 13 | 319161 | 319161 | Hist1h4n | histone cluster 1, H4n                                                      |
| TC04000013  | 0.011233 | 1.95608 | RHEB_cKO up vs WT | 0.967962 +3σ | 4 D2.1 4 5 | 20525  | 20525  | Slc2a1   | solute carrier family 2 (facilitated glucose transporter), member 1         |
| TC01000025  | 0.002341 | 1.95554 | RHEB_cKO up vs WT | 0.967568 +3σ | 1 1 E2     | 66942  | 66942  | Ddx18    | DEAD (Asp-Glu-Ala-Asp) box polypeptide 18                                   |
| TC17000010  | 0.002687 | 1.95386 | RHEB_cKO up vs WT | 0.966326 +3σ | 17 E1.2 17 | 70351  | 70351  | Ppp4r1   | protein phosphatase 4, regulatory subunit 1                                 |
| TC04000017  | 0.000206 | 1.95373 | RHEB_cKO up vs WT | 0.966235 +3σ | 4 D-E 4 73 | 13836  | 13836  | Epha2    | Eph receptor A2                                                             |
| TC09000013  | 0.009811 | 1.95312 | RHEB_cKO up vs WT | 0.965779 +3σ | 9 F1 9 58. | 15983  | 15983  | Ifrd2    | interferon-related developmental regulator 2                                |
| TC18000006  | 0.006122 | 1.95285 | RHEB_cKO up vs WT | 0.965579 +3σ | 18 E1 18   | 58801  | 58801  | Pmaip1   | phorbol-12-myristate-13-acetate-induced protein 1                           |
| TC07000025  | 0.049961 | 1.95252 | RHEB_cKO up vs WT | 0.965334 +3σ | ---        | ---    | ---    | Cd9-ps   | Cd9 antigen, pseudogene                                                     |
| TC0X000016  | 0.012652 | 1.95169 | RHEB_cKO up vs WT | 0.964724 +3σ | X F3-F4 X  | 18700  | 18700  | Piga     | phosphatidylinositol glycan anchor biosynthesis, class A                    |
| TC12000015  | 0.240535 | 1.94996 | RHEB_cKO up vs WT | 0.963447 +3σ | 12 A3 12   | 20666  | 20666  | Sox11    | SRY (sex determining region Y)-box 11                                       |
| TC0M00000   | 0.06087  | 1.94924 | RHEB_cKO up vs WT | 0.962911 +3σ | ---        | ---    | ---    | mt-Tk    | mitochondrially encoded tRNA lysine                                         |
| TC07000003  | 0.003228 | 1.94807 | RHEB_cKO up vs WT | 0.962044 +3σ | 7 A3 7     | 16534  | 16534  | Kcnn4    | potassium intermediate/small conductance calcium-activated channel, subfan  |

|            |          |         |                   |              |             |          |          |           |                                                                                     |
|------------|----------|---------|-------------------|--------------|-------------|----------|----------|-----------|-------------------------------------------------------------------------------------|
| TC1300001E | 0.009147 | 1.94761 | RHEB_cKO up vs WT | 0.961702 +3σ | 13 13 A5    | 66143    | 66143    | Eef1e1    | eukaryotic translation elongation factor 1 epsilon 1                                |
| TC02000034 | 0.010255 | 1.94694 | RHEB_cKO up vs WT | 0.961211 +3σ | ---         | ---      | ---      | Gm13461   | predicted gene 13461                                                                |
| TC02000017 | 0.044633 | 1.94492 | RHEB_cKO up vs WT | 0.959709 +3σ | 2 2         | 732489   | 732489   | Mir674    | microRNA 674                                                                        |
| TC1000001E | 0.00549  | 1.9439  | RHEB_cKO up vs WT | 0.958957 +3σ | 10 D3 10    | 14421    | 14421    | B4galnt1  | beta-1,4-N-acetyl-galactosaminyl transferase 1                                      |
| TC0500002E | 0.056567 | 1.94238 | RHEB_cKO up vs WT | 0.957826 +3σ | ---         | 1.02E+08 | 1.02E+08 | Mir7026   | microRNA 7026                                                                       |
| TC0300002E | 0.026104 | 1.94103 | RHEB_cKO up vs WT | 0.956822 +3σ | 3 F3 3 44.  | 11928    | 11928    | Atp1a1    | ATPase, Na+/K+ transporting, alpha 1 polypeptide                                    |
| TC0900001E | 0.054458 | 1.94084 | RHEB_cKO up vs WT | 0.956682 +3σ | 9 9 A4      | 68743    | 68743    | Anln      | anillin, actin binding protein                                                      |
| TC18000004 | 0.003466 | 1.93949 | RHEB_cKO up vs WT | 0.955676 +3σ | 18 C 18     | 13664    | 13664    | Eif1a     | eukaryotic translation initiation factor 1A                                         |
| TC0800000E | 0.000963 | 1.93755 | RHEB_cKO up vs WT | 0.954231 +3σ | 8 C2 8      | 68278    | 68278    | Ddx39     | DEAD (Asp-Glu-Ala-Asp) box polypeptide 39                                           |
| TC12000017 | 0.000345 | 1.93707 | RHEB_cKO up vs WT | 0.953879 +3σ | 12 12 C1-   | 18035    | 18035    | Nfkbia    | nuclear factor of kappa light polypeptide gene enhancer in B cells inhibitor, alpha |
| TC1600001E | 0.01839  | 1.93584 | RHEB_cKO up vs WT | 0.95296 +3σ  | ---         | ---      | ---      | Gm6493    | predicted gene 6493                                                                 |
| TC1000001C | 0.008136 | 1.93555 | RHEB_cKO up vs WT | 0.952743 +3σ | 10 C1 10    | 103136   | 103136   | Pwp1      | PWP1 homolog, endonuclease                                                          |
| TC1500001E | 0.017743 | 1.93493 | RHEB_cKO up vs WT | 0.952282 +3σ | 15 D1 15    | 15117    | 15117    | Has2      | hyaluronan synthase 2                                                               |
| TC1600001E | 0.062407 | 1.93448 | RHEB_cKO up vs WT | 0.951949 +3σ | 16 C.1.3 16 | 72020    | 72020    | Zfp654    | zinc finger protein 654                                                             |
| TC0500003E | 0.015368 | 1.93447 | RHEB_cKO up vs WT | 0.95194 +3σ  | 5 G2 5      | 66898    | 66898    | Baiap2l1  | BAI1-associated protein 2-like 1                                                    |
| TC0400000E | 0.42491  | 1.9317  | RHEB_cKO up vs WT | 0.949868 +3σ | 4 A5 4      | 1E+08    | 1E+08    | Gm3893    | predicted gene 3893                                                                 |
| TC0500002E | 0.002053 | 1.9315  | RHEB_cKO up vs WT | 0.94972 +3σ  | 5 B3 5      | 14181    | 14181    | Fgfbp1    | fibroblast growth factor binding protein 1                                          |
| TC1100003E | 0.007748 | 1.93092 | RHEB_cKO up vs WT | 0.94929 +3σ  | 11 E1 11    | 71795    | 71795    | Pitpnc1   | phosphatidylinositol transfer protein, cytoplasmic 1                                |
| TC0X00001E | 0.01471  | 1.93    | RHEB_cKO up vs WT | 0.948599 +3σ | ---         | 1.01E+08 | 1.01E+08 | LOC10050  | uncharacterized LOC100503338                                                        |
| TC13000017 | 0.097632 | 1.92811 | RHEB_cKO up vs WT | 0.947189 +3σ | 13 A4 13    | 13       | 66222    | Serp1b1a  | serine (or cysteine) peptidase inhibitor, clade B, member 1a                        |
| TC10000012 | 0.012804 | 1.9281  | RHEB_cKO up vs WT | 0.947177 +3σ | 10 D1 10    | 52679    | 52679    | E2f7      | E2F transcription factor 7                                                          |
| TC0400000E | 0.021108 | 1.92778 | RHEB_cKO up vs WT | 0.94694 +3σ  | 4 C4 4      | 66902    | 66902    | Mtap      | methylthioadenosine phosphorylase                                                   |
| TC1800000E | 0.015782 | 1.92775 | RHEB_cKO up vs WT | 0.946918 +3σ | 18B2 18     | 436583   | 436583   | Snora74a  | small nucleolar RNA, H/ACA box 74A                                                  |
| TC0200004E | 0.010282 | 1.92649 | RHEB_cKO up vs WT | 0.945978 +3σ | 2 E5 2      | 213696   | 213696   | Duoxa1    | dual oxidase maturation factor 1                                                    |
| TC1000002E | 0.02398  | 1.92592 | RHEB_cKO up vs WT | 0.94555 +3σ  | 10 C-D-1 10 | 13713    | 13713    | Elk3      | ELK3, member of ETS oncogene family                                                 |
| TC0X00002C | 0.025648 | 1.92582 | RHEB_cKO up vs WT | 0.945469 +3σ | X A3.3 X    | 104369   | 104369   | Snora69   | small nucleolar RNA, H/ACA box 69                                                   |
| TC1500002C | 0.037716 | 1.92573 | RHEB_cKO up vs WT | 0.945409 +3σ | 15 15 F1    | 66871    | 66871    | Cpne8     | copine VIII                                                                         |
| TC0300000E | 0.015779 | 1.92421 | RHEB_cKO up vs WT | 0.944267 +3σ | 3 3 F1      | 67738    | 67738    | Ppid      | peptidylprolyl isomerase D (cyclophilin D)                                          |
| TC19000014 | 0.033242 | 1.92384 | RHEB_cKO up vs WT | 0.943986 +3σ | 19 C2 19    | 226101   | 226101   | Myof      | myoferlin                                                                           |
| TC0700002C | 0.005169 | 1.92203 | RHEB_cKO up vs WT | 0.942634 +3σ | 7 F5 7 86.  | 12476    | 12476    | Cd151     | CD151 antigen                                                                       |
| TC17000022 | 0.001719 | 1.92126 | RHEB_cKO up vs WT | 0.942054 +3σ | 17 C 17 2E  | 53414    | 53414    | Bysl      | bystin-like                                                                         |
| TC1300002E | 0.012511 | 1.92125 | RHEB_cKO up vs WT | 0.942047 +3σ | 13 D1 13    | 238799   | 238799   | Tnpo1     | transportin 1                                                                       |
| TSUnmappe  | 0.071798 | 1.92072 | RHEB_cKO up vs WT | 0.941646 +3σ | 9 9         | 1E+08    | 1E+08    | Snord14e  | small nucleolar RNA, C/D box 14E                                                    |
| TC0X000002 | 0.026255 | 1.91813 | RHEB_cKO up vs WT | 0.939704 +3σ | ---         | ---      | ---      | Gm1848    | predicted gene 1848                                                                 |
| TC18000014 | 0.011004 | 1.91616 | RHEB_cKO up vs WT | 0.938222 +3σ | ---         | ---      | ---      | Amd-ps3   | S-adenosylmethionine decarboxylase, pseudogene 3                                    |
| TC0500001E | 0.009097 | 1.91403 | RHEB_cKO up vs WT | 0.93661 +3σ  | 5 F 5       | 76199    | 76199    | Med13l    | mediator complex subunit 13-like                                                    |
| TC1300002E | 0.004536 | 1.91393 | RHEB_cKO up vs WT | 0.936541 +3σ | 13 D1 13    | 544971   | 544971   | Bdp1      | B double prime 1, subunit of RNA polymerase III transcription initiation factor     |
| TC0200003E | 2.71E-05 | 1.91389 | RHEB_cKO up vs WT | 0.936508 +3σ | 2 2 C3      | 319876   | 319876   | Cobl1     | Cobl-like 1                                                                         |
| TC0X00002E | 0.014328 | 1.91389 | RHEB_cKO up vs WT | 0.936505 +3σ | X A6 X      | 434782   | 434782   | Gm5637    | predicted pseudogene 5637                                                           |
| TC0800001E | 0.000668 | 1.91368 | RHEB_cKO up vs WT | 0.936347 +3σ | 8 D3 8      | 104394   | 104394   | E2f4      | E2F transcription factor 4                                                          |
| TC1900001E | 0.005224 | 1.91348 | RHEB_cKO up vs WT | 0.936196 +3σ | 19 A 19     | 20908    | 20908    | Stx3      | syntaxin 3                                                                          |
| TC0400002E | 0.044079 | 1.91332 | RHEB_cKO up vs WT | 0.93608 +3σ  | 4 B1 4      | 50798    | 50798    | Gne       | glucosamine (UDP-N-acetyl)-2-epimerase/N-acetylmannosamine kinase                   |
| TC0700000E | 0.007896 | 1.91119 | RHEB_cKO up vs WT | 0.935006 +3σ | 6 C1 6      | 19240    | 19240    | Tmsb10    | thymosin, beta 10                                                                   |
| TC05000034 | 0.010686 | 1.91131 | RHEB_cKO up vs WT | 0.934565 +3σ | ---         | ---      | ---      | Got2-ps1  | glutamate oxaloacetate transaminase 2, mitochondrial, pseudogene 1                  |
| TC1400001E | 0.012773 | 1.91087 | RHEB_cKO up vs WT | 0.93423 +3σ  | 14 A3 14    | 11750    | 11750    | Anxa7     | annexin A7                                                                          |
| TC1900000C | 0.001105 | 1.90774 | RHEB_cKO up vs WT | 0.931863 +3σ | 19 A 19     | 56708    | 56708    | Clcf1     | cardiotrophin-like cytokine factor 1                                                |
| TC09000017 | 0.021033 | 1.90739 | RHEB_cKO up vs WT | 0.931602 +3σ | 9 A1 9      | 83996    | 83996    | Mmp1b     | matrix metalloproteinase 1b (interstitial collagenase)                              |
| TC0X00000E | 0.037146 | 1.90699 | RHEB_cKO up vs WT | 0.931294 +3σ | X X A5      | 14266    | 14266    | Aff2      | AF4/FMR2 family, member 2                                                           |
| TC0900000E | 0.03144  | 1.9068  | RHEB_cKO up vs WT | 0.931155 +3σ | 9 C 9 38.5  | 12306    | 12306    | Anxa2     | annexin A2                                                                          |
| TC1900001E | 0.030736 | 1.90644 | RHEB_cKO up vs WT | 0.930878 +3σ | 19 B 19     | 16952    | 16952    | Anxa1     | annexin A1                                                                          |
| TC1400002E | 0.009354 | 1.9043  | RHEB_cKO up vs WT | 0.929258 +3σ | 9 A5.1 9 2  | 15481    | 15481    | Hspa8     | heat shock protein 8                                                                |
| TC0100000E | 0.010418 | 1.90225 | RHEB_cKO up vs WT | 0.927704 +3σ | 9 A5.1 9 2  | 15481    | 15481    | Hspa8     | heat shock protein 8                                                                |
| TC1300000E | 0.017518 | 1.90192 | RHEB_cKO up vs WT | 0.927457 +3σ | ---         | ---      | ---      | Gm11395   | predicted gene 11395                                                                |
| TC11000021 | 0.007049 | 1.9014  | RHEB_cKO up vs WT | 0.927061 +3σ | 11 A1 11    | 67815    | 67815    | Sec14l2   | SEC14-like lipid binding 2                                                          |
| TC01000037 | 0.015369 | 1.899   | RHEB_cKO up vs WT | 0.925239 +3σ | 1 H5 1 84.  | 13800    | 13800    | Enah      | enabled homolog (Drosophila)                                                        |
| TC1200000E | 0.017856 | 1.89868 | RHEB_cKO up vs WT | 0.924999 +3σ | 12 C1 12    | 328110   | 328110   | Prpf39    | pre-mRNA processing factor 39                                                       |
| TC13000001 | 0.02079  | 1.8985  | RHEB_cKO up vs WT | 0.924862 +3σ | 13 A2-A3    | 319183   | 319183   | Hist1h2bj | histone cluster 1, H2bj                                                             |
| TC1400001E | 0.002876 | 1.8985  | RHEB_cKO up vs WT | 0.924861 +3σ | 14 E5 14    | 70572    | 70572    | Ipo5      | importin 5                                                                          |
| TC1800000E | 0.015466 | 1.89691 | RHEB_cKO up vs WT | 0.92365 +3σ  | 18 B2 18    | 67936    | 67936    | Wdr55     | WD repeat domain 55                                                                 |
| TC1600001E | 0.003431 | 1.89509 | RHEB_cKO up vs WT | 0.922264 +3σ | 16 16 B1    | 66409    | 66409    | Rsl1d1    | ribosomal L1 domain containing 1                                                    |
| TC11000017 | 0.002911 | 1.89379 | RHEB_cKO up vs WT | 0.921273 +3σ | ---         | ---      | ---      | Gm11653   | predicted gene 11653                                                                |
| TC1800000E | 0.035158 | 1.89314 | RHEB_cKO up vs WT | 0.920785 +3σ | 18 D3 18    | 20496    | 20496    | Slc12a2   | solute carrier family 12, member 2                                                  |
| TC1400002E | 0.027413 | 1.89299 | RHEB_cKO up vs WT | 0.920668 +3σ | 14 E.2.3 14 | 24064    | 24064    | Spry2     | sprouty homolog 2 (Drosophila)                                                      |
| TC07000024 | 0.001221 | 1.89297 | RHEB_cKO up vs WT | 0.920654 +3σ | 7 A3 7      | 67369    | 67369    | Qpctl     | glutamyl-peptide cyclotransferase-like                                              |
| TC0600002E | 0.009087 | 1.89216 | RHEB_cKO up vs WT | 0.920034 +3σ | 9 A5.1 9 2  | 15481    | 15481    | Hspa8     | heat shock protein 8                                                                |
| TC0900002E | 0.05602  | 1.89093 | RHEB_cKO up vs WT | 0.919099 +3σ | 9 D 9       | 208994   | 208994   | Fam83b    | family with sequence similarity 83, member B                                        |
| TC11000027 | 0.058156 | 1.89048 | RHEB_cKO up vs WT | 0.918752 +3σ | 11 B1.3 11  | 245827   | 245827   | Fat2      | FAT atypical cadherin 2                                                             |
| TC0600000C | 0.019867 | 1.8884  | RHEB_cKO up vs WT | 0.917161 +3σ | 6 A1 6      | 94192    | 94192    | C1galnt1  | core 1 synthase, glycoprotein-N-acetylgalactosamine 3-beta-galactosyltransferase    |
| TC0100000E | 0.008069 | 1.88762 | RHEB_cKO up vs WT | 0.916569 +3σ | 9 A5.1 9 2  | 15481    | 15481    | Hspa8     | heat shock protein 8                                                                |
| TC1600001E | 0.00542  | 1.88734 | RHEB_cKO up vs WT | 0.916357 +3σ | 16 B1 16    | 104156   | 104156   | Etv5      | ets variant 5                                                                       |
| TC0900000C | 0.00992  | 1.8871  | RHEB_cKO up vs WT | 0.916172 +3σ | 9 A1 9      | 76863    | 76863    | Dcn1d5    | DCN1, defective in cullin neddylation 1, domain containing 5 (S. cerevisiae)        |
| TC10000001 | 0.022624 | 1.88694 | RHEB_cKO up vs WT | 0.916045 +3σ | 10 A3 10    | 26408    | 26408    | Map3k5    | mitogen-activated protein kinase kinase kinase 5                                    |
| TC0900000C | 0.001535 | 1.88641 | RHEB_cKO up vs WT | 0.915644 +3σ | ---         | ---      | ---      | Gm11168   | predicted gene 11168                                                                |
| TC0400000E | 0.008672 | 1.8863  | RHEB_cKO up vs WT | 0.915561 +3σ | 4 A5 4 14.  | 100019   | 100019   | Mdn1      | midasin AAA ATPase 1                                                                |
| TC1300000E | 0.002376 | 1.88587 | RHEB_cKO up vs WT | 0.915233 +3σ | 13 A3.1 13  | 68024    | 68024    | Hist1h2bc | histone cluster 1, H2bc                                                             |
| TC0100001C | 0.001989 | 1.88529 | RHEB_cKO up vs WT | 0.914789 +3σ | 1 E2.3 1    | 67949    | 67949    | Nifk      | nucleolar protein interacting with the FHA domain of MKI67                          |
| TC1400000E | 0.003894 | 1.88454 | RHEB_cKO up vs WT | 0.914211 +3σ | ---         | ---      | ---      | Gm3534    | predicted pseudogene 3534                                                           |
| TC0500002E | 0.007831 | 1.88409 | RHEB_cKO up vs WT | 0.913871 +3σ | 5 5 D       | 433904   | 433904   | Ociad2    | O CIA domain containing 2                                                           |
| TC1000001E | 0.04043  | 1.88355 | RHEB_cKO up vs WT | 0.913455 +3σ | 10 D2 10    | 216345   | 216345   | Zfc3h1    | zinc finger, C3H1-type containing                                                   |
| TC12000004 | 0.015567 | 1.88313 | RHEB_cKO up vs WT | 0.91313 +3σ  | 12 C1 12    | 1E+08    | 1E+08    | 170004711 | RIKEN cDNA 170004711 gene 2                                                         |
| TC0100000E | 0.009943 | 1.87972 | RHEB_cKO up vs WT | 0.91052 +3σ  | 1 1 C1      | 73674    | 73674    | Wdr75     | WD repeat domain 75                                                                 |
| TC0200004E | 0.006874 | 1.87964 | RHEB_cKO up vs WT | 0.910458 +3σ | 2 E2 2      | 98956    | 98956    | Nat10     | N-acetyltransferase 10                                                              |
| TC0400002E | 0.040791 | 1.87863 | RHEB_cKO up vs WT | 0.909681 +3σ | 4 C4 4 40.  | 230376   | 230376   | Haus6     | HAUS augmin-like complex, subunit 6                                                 |
| TC0X00002C | 0.00473  | 1.87788 | RHEB_cKO up vs WT | 0.909103 +3σ | ---         | ---      | ---      | Gm15432   | predicted gene 15432                                                                |
| TC0X00001E | 0.005672 | 1.87775 | RHEB_cKO up vs WT | 0.909007 +3σ | X E3 X      | 54004    | 54004    | Diaph2    | diaphanous related formin 2                                                         |
| TC0400002E | 0.00712  | 1.87727 | RHEB_cKO up vs WT | 0.908638 +3σ | 4 B1 4 26.  | 28028    | 28028    | Mrpl50    | mitochondrial ribosomal protein L50                                                 |
| TC1400001E | 0.021514 | 1.87665 | RHEB_cKO up vs WT | 0.908158 +3σ | 14 14       | 75957    | 75957    | Mir17hg   | Mir17 host gene (non-protein coding)                                                |
| TC0200001E | 0.011627 | 1.87518 | RHEB_cKO up vs WT | 0.90703 +3σ  | 2 E1 2      | 59015    | 59015    | Nup160    | nucleoporin 160                                                                     |
| TC04000024 | 0.004434 | 1.87295 | RHEB_cKO up vs WT | 0.905315 +3σ | 4 A5 4 21.  | 12804    | 12804    | Cntfr     | ciliary neurotrophic factor receptor                                                |



|            |          |         |                   |              |            |        |        |           |                                                                                |
|------------|----------|---------|-------------------|--------------|------------|--------|--------|-----------|--------------------------------------------------------------------------------|
| TC1000001C | 0.002878 | 1.87185 | RHEB_cKO up vs WT | 0.904463 +3σ | 10 C2 10   | 75089  | 75089  | Uhrf1bp1  | UHRF1 (ICBP90) binding protein 1-like                                          |
| TC13000017 | 0.046612 | 1.87165 | RHEB_cKO up vs WT | 0.904314 +3σ | 13 A3.3 11 | 22151  | 22151  | Tubb2a    | tubulin, beta 2A class IIA                                                     |
| TC16000007 | 0.007802 | 1.87035 | RHEB_cKO up vs WT | 0.90331 +3σ  | 16 C1.1 16 | 28185  | 28185  | Tomm70a   | translocase of outer mitochondrial membrane 70 homolog A (yeast)               |
| TC16000012 | 0.04604  | 1.86977 | RHEB_cKO up vs WT | 0.902859 +3σ | 16 B1 16   | 17217  | 17217  | Mcm4      | minichromosome maintenance complex component 4                                 |
| TC07000001 | 0.026181 | 1.86921 | RHEB_cKO up vs WT | 0.902426 +3σ | ---        | ---    | ---    | Gm4879    | predicted pseudogene 4879                                                      |
| TC03000023 | 0.011748 | 1.8676  | RHEB_cKO up vs WT | 0.901185 +3σ | ---        | ---    | ---    | Gm9774    | predicted pseudogene 9774                                                      |
| TC02000003 | 0.006226 | 1.86707 | RHEB_cKO up vs WT | 0.900776 +3σ | ---        | ---    | ---    | Gm13422   | predicted gene 13422                                                           |
| TC0X00002E | 0.008206 | 1.86626 | RHEB_cKO up vs WT | 0.900148 +3σ | ---        | ---    | ---    | Gm14933   | predicted gene 14933                                                           |
| TC0700003E | 0.00812  | 1.86601 | RHEB_cKO up vs WT | 0.899953 +3σ | 7 D1 7     | 83962  | 83962  | Btbd1     | BTB (POZ) domain containing 1                                                  |
| TC08000022 | 0.011043 | 1.86415 | RHEB_cKO up vs WT | 0.898522 +3σ | 8 8 B3.2   | 108150 | 108150 | Galnt7    | UDP-N-acetyl-alpha-D-galactosamine: polypeptide N-acetylgalactosaminyltran     |
| TC04000013 | 0.01251  | 1.86396 | RHEB_cKO up vs WT | 0.898373 +3σ | ---        | ---    | ---    | Gm12891   | predicted gene 12891                                                           |
| TC1000002E | 0.023022 | 1.86349 | RHEB_cKO up vs WT | 0.898009 +3σ | ---        | ---    | ---    | Gm24119   | predicted gene, 24119                                                          |
| TC04000024 | 0.054363 | 1.86334 | RHEB_cKO up vs WT | 0.897888 +3σ | ---        | ---    | ---    | Gm22888   | predicted gene, 22888                                                          |
| TC09000021 | 0.052045 | 1.86297 | RHEB_cKO up vs WT | 0.897607 +3σ | 9 A5.2 9   | 2402   | 2402   | Cbl       | Casitas B-lineage lymphoma                                                     |
| TC0300003C | 0.117515 | 1.8628  | RHEB_cKO up vs WT | 0.897469 +3σ | 3 H2 3     | 229933 | 229933 | Clca2     | chloride channel accessory 2                                                   |
| TC02000005 | 0.04023  | 1.86275 | RHEB_cKO up vs WT | 0.897433 +3σ | 2 B 2      | 21.8   | 11898  | Ass1      | argininosuccinate synthetase 1                                                 |
| TC10000023 | 0.003722 | 1.86211 | RHEB_cKO up vs WT | 0.896935 +3σ | 10 C1 10   | 17319  | 17319  | Mif       | macrophage migration inhibitory factor                                         |
| TC05000008 | 0.339829 | 1.8621  | RHEB_cKO up vs WT | 0.896933 +3σ | 5 E1 5     | 13874  | 13874  | Ereg      | epiregulin                                                                     |
| TC1000002C | 0.016737 | 1.86102 | RHEB_cKO up vs WT | 0.896093 +3σ | 10 B1 10   | 1E+08  | 1E+08  | Amd2      | S-adenosylmethionine decarboxylase 2                                           |
| TC19000005 | 0.074916 | 1.86074 | RHEB_cKO up vs WT | 0.895874 +3σ | 19 C2 19   | 16551  | 16551  | Kif11     | kinesin family member 11                                                       |
| TC03000008 | 0.026223 | 1.8604  | RHEB_cKO up vs WT | 0.89561 +3σ  | 3 3 E-F    | 20195  | 20195  | S100a11   | S100 calcium binding protein A11                                               |
| TC1100001E | 0.01293  | 1.85871 | RHEB_cKO up vs WT | 0.894302 +3σ | ---        | ---    | ---    | Gm11625   | predicted gene 11625                                                           |
| TC18000004 | 0.026411 | 1.85837 | RHEB_cKO up vs WT | 0.89404 +3σ  | 18 B3 18   | 56070  | 56070  | Tcerg1    | transcription elongation regulator 1 (CA150)                                   |
| TC05000033 | 0.018425 | 1.85707 | RHEB_cKO up vs WT | 0.893032 +3σ | 5 G2 5     | 107939 | 107939 | Pom121    | nuclear pore membrane protein 121                                              |
| TC1200001E | 0.013851 | 1.8565  | RHEB_cKO up vs WT | 0.892582 +3σ | 12 12 C3   | 66244  | 66244  | Nemf      | nuclear export mediator factor                                                 |
| TC15000005 | 0.367121 | 1.85627 | RHEB_cKO up vs WT | 0.892406 +3σ | 15 D3 15   | 72373  | 72373  | Psc       | prostate stem cell antigen                                                     |
| TC1100002E | 0.031087 | 1.85437 | RHEB_cKO up vs WT | 0.890927 +3σ | 11 B2 11   | 20425  | 20425  | Shmt1     | serine hydroxymethyltransferase 1 (soluble)                                    |
| TC1200000E | 0.067519 | 1.8541  | RHEB_cKO up vs WT | 0.89072 +3σ  | 12 C3 12   | 319565 | 319565 | Syne2     | spectrin repeat containing, nuclear envelope 2                                 |
| TC17000005 | 0.023516 | 1.85235 | RHEB_cKO up vs WT | 0.889354 +3σ | ---        | ---    | ---    | Gm25447   | predicted gene, 25447                                                          |
| TC0900000C | 0.004409 | 1.84978 | RHEB_cKO up vs WT | 0.887351 +3σ | ---        | ---    | ---    | Gm10721   | predicted gene 10721                                                           |
| TC0200003E | 0.010198 | 1.84975 | RHEB_cKO up vs WT | 0.887332 +3σ | ---        | ---    | ---    | Gm13552   | predicted gene 13552                                                           |
| TC1600002C | 0.168799 | 1.84825 | RHEB_cKO up vs WT | 0.886158 +3σ | 16 C3.3 16 | 16699  | 16699  | Krtap13   | keratin associated protein 13                                                  |
| TC1000003C | 0.007051 | 1.84793 | RHEB_cKO up vs WT | 0.885908 +3σ | 10 10 D3   | 73192  | 73192  | Xpot      | exportin, tRNA (nuclear export receptor for tRNAs)                             |
| TC13000023 | 0.015429 | 1.84788 | RHEB_cKO up vs WT | 0.88587 +3σ  | 13 C1 13   | 69716  | 69716  | Trip13    | thyroid hormone receptor interactor 13                                         |
| TC0900000E | 0.065716 | 1.84691 | RHEB_cKO up vs WT | 0.885116 +3σ | ---        | ---    | ---    | Gm22455   | predicted gene, 22455                                                          |
| TC11000017 | 0.054184 | 1.84482 | RHEB_cKO up vs WT | 0.883483 +3σ | 11 E1 11   | 77097  | 77097  | Tanc2     | tetratricopeptide repeat, ankyrin repeat and coiled-coil containing 2          |
| TC1700001E | 0.013513 | 1.8447  | RHEB_cKO up vs WT | 0.883389 +3σ | 17 A3.3 17 | 52009  | 52009  | Hn1l      | hematological and neurological expressed 1-like                                |
| TC09000001 | 0.038221 | 1.84468 | RHEB_cKO up vs WT | 0.883374 +3σ | 9 A3 9     | 7.6    | 15894  | Icam1     | intercellular adhesion molecule 1                                              |
| TC1300000E | 0.052016 | 1.84382 | RHEB_cKO up vs WT | 0.882695 +3σ | 13 B1 13   | 328258 | 328258 | Slc25a48  | solute carrier family 25, member 48                                            |
| TC1400001E | 0.004637 | 1.84377 | RHEB_cKO up vs WT | 0.882662 +3σ | ---        | ---    | ---    | Gm21738   | predicted gene, 21738                                                          |
| TC04000022 | 0.06363  | 1.84366 | RHEB_cKO up vs WT | 0.882574 +3σ | 4 A3 4     | 70568  | 70568  | Cpne3     | copine III                                                                     |
| TC13000027 | 0.065194 | 1.84261 | RHEB_cKO up vs WT | 0.881748 +3σ | 13 D2.3 13 | 52552  | 52552  | Parp8     | poly (ADP-ribose) polymerase family, member 8                                  |
| TC1300002E | 4.49E-05 | 1.84255 | RHEB_cKO up vs WT | 0.881701 +3σ | 13 D1 13   | 328329 | 328329 | Mast4     | microtubule associated serine/threonine kinase family member 4                 |
| TC11000032 | 0.044536 | 1.84248 | RHEB_cKO up vs WT | 0.881651 +3σ | 11 11      | 1E+08  | 1E+08  | Snord4a   | small nucleolar RNA, C/D box 4A                                                |
| TC09000001 | 0.030508 | 1.84223 | RHEB_cKO up vs WT | 0.881455 +3σ | 9 9 A3     | 75316  | 75316  | Taf1d     | TATA-box binding protein associated factor, RNA polymerase I, D                |
| TC1100002C | 0.002231 | 1.8408  | RHEB_cKO up vs WT | 0.880334 +3σ | 11 11 A2   | 29856  | 29856  | Smtn      | smoothelin                                                                     |
| TC0500002E | 0.013598 | 1.84015 | RHEB_cKO up vs WT | 0.879825 +3σ | 5 C3.3 5   | 231327 | 231327 | Ppat      | phosphoribosyl pyrophosphate amidotransferase                                  |
| TC09000017 | 0.004584 | 1.83896 | RHEB_cKO up vs WT | 0.878889 +3σ | ---        | ---    | ---    | Gm16379   | predicted pseudogene 16379                                                     |
| TC1700001E | 0.00459  | 1.83875 | RHEB_cKO up vs WT | 0.878722 +3σ | 17 17 B3   | 66973  | 66973  | Mrps18b   | mitochondrial ribosomal protein S18B                                           |
| TC02000031 | 0.00936  | 1.83864 | RHEB_cKO up vs WT | 0.878637 +3σ | 2 A3 2     | 67512  | 67512  | Agpat2    | 1-acylglycerol-3-phosphate O-acyltransferase 2 (lysophosphatidic acid acyltran |
| TC11000032 | 0.022031 | 1.83731 | RHEB_cKO up vs WT | 0.877599 +3σ | 11 B5 11   | 15218  | 15218  | Foxn1     | forkhead box N1                                                                |
| TC08000007 | 0.016195 | 1.83673 | RHEB_cKO up vs WT | 0.877143 +3σ | 8 B3.3 8   | 3      | 17925  | Myo9b     | myosin IXb                                                                     |
| TC1300000E | 0.005905 | 1.8364  | RHEB_cKO up vs WT | 0.876881 +3σ | 13 13 B2   | 212880 | 212880 | Ddx46     | DEAD (Asp-Glu-Ala-Asp) box polypeptide 46                                      |
| TC0500003E | 0.003101 | 1.83617 | RHEB_cKO up vs WT | 0.876699 +3σ | 5 G2 5     | 82.    | 19353  | Rac1      | RAS-related C3 botulinum substrate 1                                           |
| TC01000023 | 0.010051 | 1.83513 | RHEB_cKO up vs WT | 0.875884 +3σ | 1 C1.2 1   | 15510  | 15510  | Hspd1     | heat shock protein 1 (chaperonin)                                              |
| TC0500000C | 0.127741 | 1.83491 | RHEB_cKO up vs WT | 0.875707 +3σ | 5 A1 5     | 20349  | 20349  | Sema3e    | sema domain, immunoglobulin domain (Ig), short basic domain, secreted, (ser    |
| TC11000031 | 0.005575 | 1.83435 | RHEB_cKO up vs WT | 0.875266 +3σ | 11 B4 11   | 276829 | 276829 | Smtnl2    | smoothelin-like 2                                                              |
| TC0200001E | 0.055183 | 1.83367 | RHEB_cKO up vs WT | 0.874736 +3σ | ---        | ---    | ---    | Gm18953   | predicted gene, 18953                                                          |
| TC0800001C | 0.010133 | 1.83234 | RHEB_cKO up vs WT | 0.873687 +3σ | 8 C5 8     | 44.    | 54352  | Irx5      | Iroquois related homeobox 5 (Drosophila)                                       |
| TC18000003 | 0.006708 | 1.83102 | RHEB_cKO up vs WT | 0.872648 +3σ | 18 B1 18   | 1      | 12385  | Ctnna1    | catenin (cadherin associated protein), alpha 1                                 |
| TC01000012 | 0.006621 | 1.83052 | RHEB_cKO up vs WT | 0.872253 +3σ | ---        | ---    | ---    | Gm4204    | predicted gene 4204                                                            |
| TC07000004 | 0.008135 | 1.83031 | RHEB_cKO up vs WT | 0.872091 +3σ | 7 A1 7     | 14113  | 14113  | Fbl       | fibrillarlin                                                                   |
| TC08000003 | 0.002405 | 1.8303  | RHEB_cKO up vs WT | 0.872077 +3σ | 8 A4-B1 8  | 13685  | 13685  | Eif4ebp1  | eukaryotic translation initiation factor 4E binding protein 1                  |
| TC0400001E | 0.039873 | 1.83001 | RHEB_cKO up vs WT | 0.871853 +3σ | ---        | ---    | ---    | Anp32b-ps | Bacidic (leucine-rich) nuclear phosphoprotein 32 family, member B, pseudoge    |
| TC09000001 | 0.007109 | 1.82898 | RHEB_cKO up vs WT | 0.871037 +3σ | 9 9 A4     | 60507  | 60507  | Qtrt1     | queuine tRNA-ribosyltransferase 1                                              |
| TC11000033 | 0.016391 | 1.82833 | RHEB_cKO up vs WT | 0.87053 +3σ  | 11 C 11    | 237887 | 237887 | Slfn10-ps | schlafen 10, pseudogene                                                        |
| TC0700001E | 0.010187 | 1.82743 | RHEB_cKO up vs WT | 0.869814 +3σ | 7 F1 7     | 233726 | 233726 | Ipo7      | importin 7                                                                     |
| TC18000002 | 0.010069 | 1.82732 | RHEB_cKO up vs WT | 0.869729 +3σ | 18 B1 18   | 225348 | 225348 | Wdr36     | WD repeat domain 36                                                            |
| TC1000001C | 0.006137 | 1.82709 | RHEB_cKO up vs WT | 0.869548 +3σ | ---        | ---    | ---    | Gm8394    | predicted gene 8394                                                            |
| TC05000005 | 0.004009 | 1.82651 | RHEB_cKO up vs WT | 0.869088 +3σ | ---        | ---    | ---    | Gm5560    | predicted pseudogene 5560                                                      |
| TC0500002E | 0.019569 | 1.82582 | RHEB_cKO up vs WT | 0.868548 +3σ | ---        | ---    | ---    | Gm15484   | predicted gene 15484                                                           |
| TC11000031 | 0.00603  | 1.82566 | RHEB_cKO up vs WT | 0.868414 +3σ | 11 B4 11   | 12261  | 12261  | C1qbp     | complement component 1, q subcomponent binding protein                         |
| TC05000027 | 0.175226 | 1.82478 | RHEB_cKO up vs WT | 0.867723 +3σ | 5 E1 5     | 13874  | 13874  | Ereg      | epiregulin                                                                     |
| TC0100000E | 0.022416 | 1.82448 | RHEB_cKO up vs WT | 0.867484 +3σ | 1 D 1      | 227333 | 227333 | Dgkd      | diacylglycerol kinase, delta                                                   |
| TC14000021 | 0.062202 | 1.82413 | RHEB_cKO up vs WT | 0.867208 +3σ | 14 C3 14   | 14623  | 14623  | Gjb6      | gap junction protein, beta 6                                                   |
| TC1200000C | 0.005153 | 1.82363 | RHEB_cKO up vs WT | 0.866812 +3σ | 12 A1.1 12 | 20969  | 20969  | Sdc1      | syndecan 1                                                                     |
| TC02000005 | 0.035733 | 1.82309 | RHEB_cKO up vs WT | 0.866388 +3σ | ---        | ---    | ---    | Gm25966   | predicted gene, 25966                                                          |
| TC07000042 | 0.004528 | 1.82298 | RHEB_cKO up vs WT | 0.866299 +3σ | 7 F4 7     | 69.    | 56347  | Eif3c     | eukaryotic translation initiation factor 3, subunit C                          |
| TC0900000C | 0.004148 | 1.82254 | RHEB_cKO up vs WT | 0.865951 +3σ | ---        | ---    | ---    | Gm10717   | predicted gene 10717                                                           |
| TC1200000E | 0.006163 | 1.82215 | RHEB_cKO up vs WT | 0.865639 +3σ | ---        | ---    | ---    | Gm17138   | predicted gene 17138                                                           |
| TC0900001C | 0.108098 | 1.82197 | RHEB_cKO up vs WT | 0.865502 +3σ | 9 E1 9     | 235505 | 235505 | Cd109     | CD109 antigen                                                                  |
| TC03000004 | 0.022221 | 1.82162 | RHEB_cKO up vs WT | 0.865226 +3σ | 2 A7.2 2   | 229279 | 229279 | Hnrnpa3   | heterogeneous nuclear ribonucleoprotein A3                                     |
| TC1700000E | 0.008511 | 1.82133 | RHEB_cKO up vs WT | 0.864992 +3σ | 17 17 C    | 27226  | 27226  | Pla2g7    | phospholipase A2, group VII (platelet-activating factor acetylhydrolase, plasm |
| TC09000001 | 0.024711 | 1.82122 | RHEB_cKO up vs WT | 0.864907 +3σ | ---        | ---    | ---    | Gm5611    | predicted gene 5611                                                            |
| TC15000005 | 0.086023 | 1.82053 | RHEB_cKO up vs WT | 0.864362 +3σ | ---        | ---    | ---    | Gm22519   | predicted gene, 22519                                                          |
| TC06000005 | 0.002241 | 1.81969 | RHEB_cKO up vs WT | 0.863689 +3σ | 6 B2.3 6   | 2      | 56524  | Mpp6      | membrane protein, palmitoylated 6 (MAGUK p55 subfamily member 6)               |
| TC10000031 | 0.062951 | 1.81956 | RHEB_cKO up vs WT | 0.863588 +3σ | 10 D3 10   | 13139  | 13139  | Dgka      | diacylglycerol kinase, alpha                                                   |
| TC0500003E | 0.019079 | 1.81802 | RHEB_cKO up vs WT | 0.862365 +3σ | 5 G3 5     | 89.    | 15505  | Hsph1     | heat shock 105kDa/110kDa protein 1                                             |
| TC13000005 | 0.014043 | 1.81795 | RHEB_cKO up vs WT | 0.862309 +3σ | 13 A5 13   | 75678  | 75678  | Ippk      | inositol 1,3,4,5,6-pentakisphosphate 2-kinase                                  |

|           |          |         |                   |              |             |        |        |          |                                                                         |
|-----------|----------|---------|-------------------|--------------|-------------|--------|--------|----------|-------------------------------------------------------------------------|
| TC1000001 | 0.005069 | 1.81719 | RHEB_cKO up vs WT | 0.861708 +3σ | 10 C3 10    | 216238 | 216238 | Eea1     | early endosome antigen 1                                                |
| TC0300002 | 0.025526 | 1.81623 | RHEB_cKO up vs WT | 0.860946 +3σ | 3 3 F3      | 19221  | 19221  | Ptgfrn   | prostaglandin F2 receptor negative regulator                            |
| TC1100000 | 0.015138 | 1.81582 | RHEB_cKO up vs WT | 0.860623 +3σ | 11 11 B2    | 73158  | 73158  | Larp1    | La ribonucleoprotein domain family, member 1                            |
| TC1800000 | 0.014244 | 1.81569 | RHEB_cKO up vs WT | 0.860515 +3σ | ---         | ---    | ---    | Gm6457   | predicted pseudogene 6457                                               |
| TC0900000 | 0.000518 | 1.81455 | RHEB_cKO up vs WT | 0.859609 +3σ | 9 A5.3 9    | 73699  | 73699  | Ppp2r1b  | protein phosphatase 2, regulatory subunit A, beta                       |
| TC0200004 | 0.002452 | 1.81327 | RHEB_cKO up vs WT | 0.858597 +3σ | ---         | ---    | ---    | Gm14121  | predicted gene 14121                                                    |
| TC0500002 | 0.003813 | 1.81212 | RHEB_cKO up vs WT | 0.857681 +3σ | 5 5 A3-B    | 19248  | 19248  | Ptpn12   | protein tyrosine phosphatase, non-receptor type 12                      |
| TC1800001 | 0.007809 | 1.81165 | RHEB_cKO up vs WT | 0.857308 +3σ | 18 E1 18    | 70223  | 70223  | Nars     | asparaginyl-tRNA synthetase                                             |
| TC0900001 | 0.004994 | 1.81142 | RHEB_cKO up vs WT | 0.857123 +3σ | 9 9 A1      | 67618  | 67618  | Aasdhppt | aminoadipate-semialdehyde dehydrogenase-phosphopantetheinyl transferase |
| TC1100003 | 0.022131 | 1.81015 | RHEB_cKO up vs WT | 0.856105 +3σ | ---         | ---    | ---    | Gm10039  | predicted pseudogene 10039                                              |
| TC0X00002 | 0.065608 | 1.80898 | RHEB_cKO up vs WT | 0.855175 +3σ | ---         | ---    | ---    | Gm14681  | predicted gene 14681                                                    |
| TC0500001 | 0.001952 | 1.80778 | RHEB_cKO up vs WT | 0.854218 +3σ | 5 F 5       | 231713 | 231713 | Naa25    | N(alpha)-acetyltransferase 25, NatB auxiliary subunit                   |
| TC1000000 | 0.006449 | 1.80744 | RHEB_cKO up vs WT | 0.85395 +3σ  | 10 B5.3 10  | 52696  | 52696  | Zwint    | ZW10 interactor                                                         |
| TC1500001 | 0.025851 | 1.80629 | RHEB_cKO up vs WT | 0.85303 +3σ  | 15 E1 15    | 1E+08  | 1E+08  | Snord43  | small nucleolar RNA, C/D box 43                                         |
| TC0100002 | 0.051294 | 1.80544 | RHEB_cKO up vs WT | 0.852348 +3σ | 1 C2 1      | 77300  | 77300  | Raph1    | Ras association (RalGDS/AF-6) and pleckstrin homology domains 1         |
| TC0700002 | 0.017794 | 1.805   | RHEB_cKO up vs WT | 0.851998 +3σ | 7 B3 7      | 434175 | 434175 | Gm5593   | predicted gene 5593                                                     |
| TC1400002 | 0.00446  | 1.80458 | RHEB_cKO up vs WT | 0.851665 +3σ | 14 C1 14    | 27374  | 27374  | Prmt5    | protein arginine N-methyltransferase 5                                  |
| TC0800000 | 0.064997 | 1.80279 | RHEB_cKO up vs WT | 0.850231 +3σ | 8 A2 8 11.  | 20377  | 20377  | Sfrp1    | secreted frizzled-related protein 1                                     |
| TC1600001 | 0.029124 | 1.80141 | RHEB_cKO up vs WT | 0.84913 +3σ  | 16 B3 16    | 1E+08  | 1E+08  | BC117090 | cDNA sequence BC117090                                                  |
| TC1600002 | 0.011111 | 1.8003  | RHEB_cKO up vs WT | 0.848236 +3σ | 16 C3.3 16  | 207932 | 207932 | Urb1     | URB1 ribosome biogenesis 1 homolog (S. cerevisiae)                      |
| TC1300000 | 0.064739 | 1.80017 | RHEB_cKO up vs WT | 0.848137 +3σ | ---         | ---    | ---    | Gm24539  | predicted gene, 24539                                                   |
| TC1700000 | 0.002169 | 1.80004 | RHEB_cKO up vs WT | 0.848033 +3σ | 17 B1 17 1  | 114584 | 114584 | Clic1    | chloride intracellular channel 1                                        |
| TC1500001 | 0.007738 | 1.79911 | RHEB_cKO up vs WT | 0.84728 +3σ  | 15 B3.2 15  | 67429  | 67429  | Nudcd1   | NudC domain containing 1                                                |
| TC0600001 | 0.000388 | 1.79903 | RHEB_cKO up vs WT | 0.847222 +3σ | 6 F3 6 59.  | 21937  | 21937  | Tnfrsf1a | tumor necrosis factor receptor superfamily, member 1a                   |
| TC0700003 | 0.001923 | 1.79875 | RHEB_cKO up vs WT | 0.846996 +3σ | 7 B4 7      | 101612 | 101612 | Grwd1    | glutamate-rich WD repeat containing 1                                   |
| TC1500001 | 0.077859 | 1.79866 | RHEB_cKO up vs WT | 0.846924 +3σ | 15 D3 15 3  | 110454 | 110454 | Ly6a     | lymphocyte antigen 6 complex, locus A                                   |
| TC1100001 | 0.021378 | 1.79837 | RHEB_cKO up vs WT | 0.846691 +3σ | 11 B5 11    | 104662 | 104662 | Tsr1     | TSR1 20S rRNA accumulation                                              |
| TC1900000 | 0.000741 | 1.79765 | RHEB_cKO up vs WT | 0.846111 +3σ | 19 A 19     | 66961  | 66961  | Neat1    | nuclear paraspeckle assembly transcript 1 (non-protein coding)          |
| TC1600001 | 0.007822 | 1.7974  | RHEB_cKO up vs WT | 0.845913 +3σ | 16 A1 16 4  | 52502  | 52502  | Carhsp1  | calcium regulated heat stable protein 1                                 |
| TC1700000 | 0.004193 | 1.79732 | RHEB_cKO up vs WT | 0.845847 +3σ | ---         | ---    | ---    | Gm8741   | predicted gene 8741                                                     |
| TC1300002 | 0.019198 | 1.79672 | RHEB_cKO up vs WT | 0.845369 +3σ | 13 D2.2 13  | 72198  | 72198  | Skiv2l2  | superkiller viralicidic activity 2-like 2 (S. cerevisiae)               |
| TC1000002 | 0.006534 | 1.79591 | RHEB_cKO up vs WT | 0.844717 +3σ | 10 C1 10    | 216161 | 216161 | Sbno2    | strawberry notch homolog 2 (Drosophila)                                 |
| TC0800000 | 0.015955 | 1.79491 | RHEB_cKO up vs WT | 0.84391 +3σ  | 8 B3.3 8    | 71780  | 71780  | Isyna1   | myo-inositol 1-phosphate synthase A1                                    |
| TC0500000 | 0.021242 | 1.79469 | RHEB_cKO up vs WT | 0.843732 +3σ | 5 E3 5 47.  | 11745  | 11745  | Anxa3    | annexin A3                                                              |
| TC1000002 | 0.034615 | 1.79459 | RHEB_cKO up vs WT | 0.843657 +3σ | 10 D2 10    | 72068  | 72068  | Cnot2    | CCR4-NOT transcription complex, subunit 2                               |
| TC0200003 | 0.007396 | 1.79453 | RHEB_cKO up vs WT | 0.843605 +3σ | ---         | ---    | ---    | Gm13316  | predicted gene 13316                                                    |
| TC0900003 | 0.037464 | 1.79386 | RHEB_cKO up vs WT | 0.843065 +3σ | 9 F3 9 68.  | 21813  | 21813  | Tgfb2    | transforming growth factor, beta receptor II                            |
| TC1200002 | 0.071881 | 1.79372 | RHEB_cKO up vs WT | 0.842954 +3σ | 12 F1 12 6  | 16450  | 16450  | Jag2     | jagged 2                                                                |
| TC0300001 | 0.002318 | 1.79368 | RHEB_cKO up vs WT | 0.84292 +3σ  | ---         | ---    | ---    | Gm2574   | predicted pseudogene 2574                                               |
| TC0200004 | 0.001672 | 1.79296 | RHEB_cKO up vs WT | 0.842344 +3σ | 2 E2 2      | 228413 | 228413 | Prrg4    | proline rich Gla (G-carboxyglutamic acid) 4 (transmembrane)             |
| TC1500002 | 0.005584 | 1.7926  | RHEB_cKO up vs WT | 0.842053 +3σ | 15 F1 15    | 22337  | 22337  | Vdr      | vitamin D receptor                                                      |
| TC1600000 | 0.050368 | 1.79239 | RHEB_cKO up vs WT | 0.841881 +3σ | ---         | ---    | ---    | Gm9027   | predicted gene 9027                                                     |
| TC1800000 | 0.100379 | 1.79175 | RHEB_cKO up vs WT | 0.84137 +3σ  | 18 18 A2    | 19877  | 19877  | Rock1    | Rho-associated coiled-coil containing protein kinase 1                  |
| TC0700004 | 0.018475 | 1.79174 | RHEB_cKO up vs WT | 0.84136 +3σ  | 7 F2 7      | 76179  | 76179  | Usp31    | ubiquitin specific peptidase 31                                         |
| TC0M00000 | 0.162623 | 1.79144 | RHEB_cKO up vs WT | 0.841119 +3σ | ---         | ---    | ---    | mt-Th    | mitochondrially encoded tRNA histidine                                  |
| TC0300000 | 0.028051 | 1.79051 | RHEB_cKO up vs WT | 0.840374 +3σ | ---         | ---    | ---    | Gm6097   | predicted pseudogene 6097                                               |
| TC0900003 | 0.017477 | 1.79015 | RHEB_cKO up vs WT | 0.840078 +3σ | 9 D 9       | 225215 | 225215 | Rsl24d1  | ribosomal L24 domain containing 1                                       |
| TC1600001 | 0.033307 | 1.78861 | RHEB_cKO up vs WT | 0.838838 +3σ | 16 B2 16 2  | 224105 | 224105 | Pak2     | p21 protein (Cdc42/Rac)-activated kinase 2                              |
| TC1100002 | 0.019695 | 1.78853 | RHEB_cKO up vs WT | 0.838776 +3σ | 11 B1.3 11  | 216766 | 216766 | Gemin5   | gem (nuclear organelle) associated protein 5                            |
| TC0300001 | 0.011862 | 1.78825 | RHEB_cKO up vs WT | 0.838552 +3σ | 3 3 H3      | 69219  | 69219  | Ddah1    | dimethylarginine dimethylaminohydrolase 1                               |
| TC0100002 | 0.00051  | 1.7867  | RHEB_cKO up vs WT | 0.837296 +3σ | 1 C4 1      | 23874  | 23874  | Farsb    | phenylalanyl-tRNA synthetase, beta subunit                              |
| TC1400000 | 0.00247  | 1.78662 | RHEB_cKO up vs WT | 0.837234 +3σ | 14 B 14     | 74427  | 74427  | Eaf1     | ELL associated factor 1                                                 |
| TC0600003 | 0.052928 | 1.78575 | RHEB_cKO up vs WT | 0.836528 +3σ | 6 F3 6 59.  | 12527  | 12527  | Cd9      | CD9 antigen                                                             |
| TC0800001 | 0.049123 | 1.78568 | RHEB_cKO up vs WT | 0.836475 +3σ | 8 D3 8 53.  | 12560  | 12560  | Cdh3     | cadherin 3                                                              |
| TC0400004 | 0.005014 | 1.78539 | RHEB_cKO up vs WT | 0.836237 +3σ | 4 D3 4      | 212632 | 212632 | Iffo2    | intermediate filament family orphan 2                                   |
| TC1600001 | 0.023592 | 1.78538 | RHEB_cKO up vs WT | 0.836227 +3σ | ---         | ---    | ---    | Gm9242   | predicted pseudogene 9242                                               |
| TC0600000 | 0.01348  | 1.78476 | RHEB_cKO up vs WT | 0.835732 +3σ | 6 B3 6      | 68140  | 68140  | Tigd2    | tigger transposable element derived 2                                   |
| TC1000001 | 0.235661 | 1.78472 | RHEB_cKO up vs WT | 0.835701 +3σ | 10 C1 10    | 216225 | 216225 | Slc5a8   | solute carrier family 5 (iodide transporter), member 8                  |
| TC0100002 | 0.016493 | 1.78452 | RHEB_cKO up vs WT | 0.835535 +3σ | 1 B 1       | 72097  | 72097  | 2010300C | RIKEN cDNA 2010300C02 gene                                              |
| TC1100003 | 0.001648 | 1.78434 | RHEB_cKO up vs WT | 0.835389 +3σ | 11 B4 11 4  | 18643  | 18643  | Pfn1     | profilin 1                                                              |
| TC1500001 | 0.026674 | 1.78385 | RHEB_cKO up vs WT | 0.834997 +3σ | 15 E1 15 3  | 17886  | 17886  | Myh9     | myosin, heavy polypeptide 9, non-muscle                                 |
| TC0800000 | 0.009879 | 1.78327 | RHEB_cKO up vs WT | 0.834528 +3σ | 8 8 A1-A3   | 21781  | 21781  | Tfdp1    | transcription factor Dp 1                                               |
| TC0600001 | 0.043802 | 1.78239 | RHEB_cKO up vs WT | 0.833809 +3σ | 6 A2 6 7.8  | 17295  | 17295  | Met      | met proto-oncogene                                                      |
| TC0X00001 | 0.002641 | 1.7823  | RHEB_cKO up vs WT | 0.83374 +3σ  | ---         | ---    | ---    | Gm16459  | predicted gene 16459                                                    |
| TC0800001 | 0.014214 | 1.78199 | RHEB_cKO up vs WT | 0.833489 +3σ | 8 8 A1.2    | 20419  | 20419  | Shcbp1   | Shc SH2-domain binding protein 1                                        |
| TC1000002 | 0.003976 | 1.7797  | RHEB_cKO up vs WT | 0.831638 +3σ | 10 B5-C1 10 | 12822  | 12822  | Col18a1  | collagen, type XVIII, alpha 1                                           |
| TC0200004 | 0.000152 | 1.77843 | RHEB_cKO up vs WT | 0.830601 +3σ | 2 E5 2      | 98878  | 98878  | Ehd4     | EH-domain containing 4                                                  |
| TC0M00000 | 0.033093 | 1.77806 | RHEB_cKO up vs WT | 0.830308 +3σ | ---         | ---    | ---    | mt-Tr    | mitochondrially encoded tRNA arginine                                   |
| TC0800002 | 0.001265 | 1.77772 | RHEB_cKO up vs WT | 0.830026 +3σ | ---         | ---    | ---    | Gm3272   | predicted pseudogene 3272                                               |
| TC0500002 | 0.004781 | 1.77712 | RHEB_cKO up vs WT | 0.829542 +3σ | 5 B3 5      | 231225 | 231225 | Tapt1    | transmembrane anterior posterior transformation 1                       |
| TC0400001 | 0.091382 | 1.77636 | RHEB_cKO up vs WT | 0.828924 +3σ | ---         | ---    | ---    | Gm25099  | predicted gene, 25099                                                   |
| TC1600000 | 0.019257 | 1.77604 | RHEB_cKO up vs WT | 0.828664 +3σ | 16 B4 16    | 212547 | 212547 | Nepro    | nucleolus and neural progenitor protein                                 |
| TC0900001 | 0.058871 | 1.77596 | RHEB_cKO up vs WT | 0.828598 +3σ | 9 E3.3 9 5  | 19659  | 19659  | Rbp1     | retinol binding protein 1, cellular                                     |
| TC0400002 | 0.013113 | 1.7758  | RHEB_cKO up vs WT | 0.82847 +3σ  | 4 E2 4      | 74035  | 74035  | Nol9     | nucleolar protein 9                                                     |
| TC1000001 | 0.012603 | 1.77497 | RHEB_cKO up vs WT | 0.827794 +3σ | 10 D3 10    | 237615 | 237615 | Ankrd52  | ankyrin repeat domain 52                                                |
| TC0300002 | 0.005318 | 1.77426 | RHEB_cKO up vs WT | 0.82722 +3σ  | 3 F1 3 38.  | 16905  | 16905  | Lmna     | lamin A                                                                 |
| TC0400000 | 0.004824 | 1.77351 | RHEB_cKO up vs WT | 0.82661 +3σ  | ---         | ---    | ---    | Gm11185  | predicted gene 11185                                                    |
| TC0200003 | 0.018404 | 1.77313 | RHEB_cKO up vs WT | 0.826295 +3σ | 2 C1.1 2    | 74194  | 74194  | Rnd3     | Rho family GTPase 3                                                     |
| TC0500003 | 0.022254 | 1.77279 | RHEB_cKO up vs WT | 0.82602 +3σ  | 5 G2 5      | 83701  | 83701  | Srrt     | serrate RNA effector molecule homolog (Arabidopsis)                     |
| TC1200001 | 0.046508 | 1.77263 | RHEB_cKO up vs WT | 0.825888 +3σ | 12 F2 12    | 76044  | 76044  | Ncapg2   | non-SMC condensin II complex, subunit G2                                |
| TC1700000 | 6.45E-05 | 1.77257 | RHEB_cKO up vs WT | 0.825844 +3σ | 17 B1 17    | 57315  | 57315  | Wdr46    | WD repeat domain 46                                                     |
| TC0900000 | 0.001688 | 1.77251 | RHEB_cKO up vs WT | 0.825795 +3σ | ---         | ---    | ---    | Gm10719  | predicted gene 10719                                                    |
| TC0500000 | 0.018104 | 1.77244 | RHEB_cKO up vs WT | 0.825737 +3σ | 5 5         | 1E+08  | 1E+08  | Snord93  | small nucleolar RNA, C/D box 93                                         |
| TC0X00002 | 0.005439 | 1.77215 | RHEB_cKO up vs WT | 0.825504 +3σ | X C3 X      | 76130  | 76130  | Las1l    | LAS1-like (S. cerevisiae)                                               |
| TC0200004 | 0.046869 | 1.7715  | RHEB_cKO up vs WT | 0.824975 +3σ | ---         | ---    | ---    | Gm23969  | predicted gene, 23969                                                   |
| TC0700002 | 0.000855 | 1.77144 | RHEB_cKO up vs WT | 0.824923 +3σ | ---         | ---    | ---    | Gm10169  | predicted pseudogene 10169                                              |
| TC0X00000 | 0.016256 | 1.77133 | RHEB_cKO up vs WT | 0.824834 +3σ | ---         | ---    | ---    | Gm5940   | predicted gene 5940                                                     |
| TC0700000 | 0.008812 | 1.7712  | RHEB_cKO up vs WT | 0.824727 +3σ | 7 A3 7      | 16801  | 16801  | Arhgef1  | Rho guanine nucleotide exchange factor (GEF) 1                          |
| TC1500001 | 0.029842 | 1.77085 | RHEB_cKO up vs WT | 0.824438 +3σ | 15 D2 15    | 20442  | 20442  | St3gal1  | ST3 beta-galactoside alpha-2,3-sialyltransferase 1                      |

|            |          |         |                   |              |              |          |          |           |                                                                              |
|------------|----------|---------|-------------------|--------------|--------------|----------|----------|-----------|------------------------------------------------------------------------------|
| TC16000006 | 0.028165 | 1.77051 | RHEB_cKO up vs WT | 0.824167 +3σ | 16 B4 16     | 72117    | 72117    | Naa50     | N(alpha)-acetyltransferase 50, NatE catalytic subunit                        |
| TC05000008 | 0.010057 | 1.77051 | RHEB_cKO up vs WT | 0.824166 +3σ | 5 E2 5 47.   | 52398    | 52398    | Sept11    | septin 11                                                                    |
| TC01000018 | 0.030587 | 1.77039 | RHEB_cKO up vs WT | 0.824066 +3σ | 1 H6 1       | 77065    | 77065    | Ints7     | integrator complex subunit 7                                                 |
| TC07000046 | 0.033852 | 1.77013 | RHEB_cKO up vs WT | 0.823859 +3σ | 7 F5 7       | 101772   | 101772   | Ano1      | anoctamin 1, calcium activated chloride channel                              |
| TC13000001 | 0.044612 | 1.76963 | RHEB_cKO up vs WT | 0.823448 +3σ | 13 A3.1 1:   | 1E+08    | 1E+08    | Hist1h4m  | histone cluster 1, H4m                                                       |
| TC08000030 | 0.011459 | 1.76941 | RHEB_cKO up vs WT | 0.823272 +3σ | ---          | ---      | ---      | Gm15899   | predicted gene 15899                                                         |
| TC02000017 | 0.019618 | 1.76857 | RHEB_cKO up vs WT | 0.822586 +3σ | 2 E5 2       | 114715   | 114715   | Spred1    | sprouty protein with EVH-1 domain 1, related sequence                        |
| TC01000008 | 0.015251 | 1.76826 | RHEB_cKO up vs WT | 0.822329 +3σ | ---          | ---      | ---      | Gm5832    | predicted gene 5832                                                          |
| TC08000024 | 0.02519  | 1.76811 | RHEB_cKO up vs WT | 0.822209 +3σ | 8 B3.3 8     | 104370   | 104370   | Snora68   | small nucleolar RNA, H/ACA box 68                                            |
| TC06000031 | 0.00396  | 1.76808 | RHEB_cKO up vs WT | 0.822187 +3σ | ---          | ---      | ---      | Gm4691    | predicted gene 4691                                                          |
| TC17000011 | 0.071089 | 1.76753 | RHEB_cKO up vs WT | 0.821736 +3σ | 17 17 E3     | 268977   | 268977   | Ltpb1     | latent transforming growth factor beta binding protein 1                     |
| TC16000020 | 0.014665 | 1.76682 | RHEB_cKO up vs WT | 0.821158 +3σ | 16 C3-C4 :   | 14450    | 14450    | Gart      | phosphoribosylglycinamide formyltransferase                                  |
| TC15000000 | 0.149515 | 1.76663 | RHEB_cKO up vs WT | 0.821001 +3σ | 15 A1 15 :   | 16880    | 16880    | Lifr      | leukemia inhibitory factor receptor                                          |
| TC17000011 | 0.008853 | 1.76661 | RHEB_cKO up vs WT | 0.820985 +3σ | 17 E2 17     | 74196    | 74196    | Ttc27     | tetrapeptide repeat domain 27                                                |
| TC03000025 | 0.015699 | 1.76594 | RHEB_cKO up vs WT | 0.820439 +3σ | 3 F2.2 3     | 269470   | 269470   | Wdr3      | WD repeat domain 3                                                           |
| TC04000021 | 0.008288 | 1.76548 | RHEB_cKO up vs WT | 0.820061 +3σ | 4 4 E        | 21936    | 21936    | Tnfrsf18  | tumor necrosis factor receptor superfamily, member 18                        |
| TC11000003 | 0.015103 | 1.76542 | RHEB_cKO up vs WT | 0.820011 +3σ | 11 A4 11     | 211347   | 211347   | Pank3     | pantothenate kinase 3                                                        |
| TC18000011 | 0.025555 | 1.76499 | RHEB_cKO up vs WT | 0.819656 +3σ | 18 C 18 18   | 15526    | 15526    | Hspa9     | heat shock protein 9                                                         |
| TC12000018 | 0.03292  | 1.76434 | RHEB_cKO up vs WT | 0.819128 +3σ | 12 C3-D 1:   | 20663    | 20663    | Sos2      | son of sevenless homolog 2 (Drosophila)                                      |
| TC09000000 | 0.001799 | 1.76389 | RHEB_cKO up vs WT | 0.818757 +3σ | ---          | ---      | ---      | Gm10715   | predicted gene 10715                                                         |
| TC14000001 | 0.099169 | 1.76388 | RHEB_cKO up vs WT | 0.818756 +3σ | 14 A3 14 :   | 18792    | 18792    | Plau      | plasminogen activator, urokinase                                             |
| TC11000023 | 0.001695 | 1.76328 | RHEB_cKO up vs WT | 0.818259 +3σ | ---          | ---      | ---      | Gm12033   | predicted gene 12033                                                         |
| TC08000011 | 0.005062 | 1.76276 | RHEB_cKO up vs WT | 0.817838 +3σ | 8 D1 8       | 1E+08    | 1E+08    | Gm15210   | inosine 5-phosphate dehydrogenase 2                                          |
| TC07000030 | 0.090161 | 1.76235 | RHEB_cKO up vs WT | 0.8175 +3σ   | 7 B4 7 30.   | 20208    | 20208    | Saa1      | serum amyloid A 1                                                            |
| TC11000024 | 0.030465 | 1.76213 | RHEB_cKO up vs WT | 0.817322 +3σ | 11 A4 11     | 18148    | 18148    | Npm1      | nucleophosmin 1                                                              |
| TC02000015 | 0.004541 | 1.76213 | RHEB_cKO up vs WT | 0.817317 +3σ | ---          | ---      | ---      | Gm13882   | predicted gene 13882                                                         |
| TC12000008 | 0.002352 | 1.76197 | RHEB_cKO up vs WT | 0.817188 +3σ | 12 12 D3     | 78920    | 78920    | Dlst      | dihydroliipoamide S-succinyltransferase (E2 component of 2-oxo-glutarate con |
| TC01000032 | 0.023247 | 1.76182 | RHEB_cKO up vs WT | 0.817065 +3σ | 1 G3 1 65.   | 13211    | 13211    | Dhx9      | DEAH (Asp-Glu-Ala-His) box polypeptide 9                                     |
| TC15000012 | 0.001879 | 1.76048 | RHEB_cKO up vs WT | 0.815966 +3σ | 15 A1 15 :   | 110960   | 110960   | Tars      | threonyl-tRNA synthetase                                                     |
| TC12000020 | 0.00857  | 1.76001 | RHEB_cKO up vs WT | 0.81558 +3σ  | ---          | ---      | ---      | Gm3695    | predicted gene 3695                                                          |
| TC19000017 | 0.012286 | 1.75984 | RHEB_cKO up vs WT | 0.81544 +3σ  | 19 D3 19     | 107368   | 107368   | Pdzd8     | PDZ domain containing 8                                                      |
| TC03000007 | 0.019964 | 1.7596  | RHEB_cKO up vs WT | 0.815247 +3σ | 3 F1 3       | 229504   | 229504   | Isg20l2   | interferon stimulated exonuclease gene 20-like 2                             |
| TC14000021 | 0.007121 | 1.75944 | RHEB_cKO up vs WT | 0.815113 +3σ | 14 D1 14     | 71844    | 71844    | Nupl1     | nucleoporin like 1                                                           |
| TC16000007 | 0.044727 | 1.75859 | RHEB_cKO up vs WT | 0.814422 +3σ | 16 B5 16     | 224171   | 224171   | C330027C  | RIKEN cDNA C330027C09 gene                                                   |
| TC14000005 | 0.034457 | 1.75681 | RHEB_cKO up vs WT | 0.812962 +3σ | 14 D1 14     | 14714    | 14714    | Gnrh1     | gonadotropin releasing hormone 1                                             |
| TC10000025 | 0.014673 | 1.75639 | RHEB_cKO up vs WT | 0.812611 +3σ | 10 D2 10     | 12461    | 12461    | Cct2      | chaperonin containing Tcp1, subunit 2 (beta)                                 |
| TC04000016 | 0.029479 | 1.75385 | RHEB_cKO up vs WT | 0.810524 +3σ | 4 D3-E 4 6   | 20544    | 20544    | Slc9a1    | solute carrier family 9 (sodium/hydrogen exchanger), member 1                |
| TC13000021 | 0.098284 | 1.75313 | RHEB_cKO up vs WT | 0.809932 +3σ | ---          | ---      | ---      | Gm24095   | predicted gene, 24095                                                        |
| TC04000037 | 0.018657 | 1.75255 | RHEB_cKO up vs WT | 0.809452 +3σ | 4 D3 4       | 100017   | 100017   | Ldlrap1   | low density lipoprotein receptor adaptor protein 1                           |
| TC11000017 | 0.010809 | 1.75109 | RHEB_cKO up vs WT | 0.80825 +3σ  | ---          | ---      | ---      | Gm11652   | predicted gene 11652                                                         |
| TC01000000 | 0.023269 | 1.75084 | RHEB_cKO up vs WT | 0.808051 +3σ | ---          | ---      | ---      | Gm6161    | predicted gene 6161                                                          |
| TC07000035 | 0.020823 | 1.7508  | RHEB_cKO up vs WT | 0.808016 +3σ | 7 D3 7 45.   | 29875    | 29875    | Iqgap1    | IQ motif containing GTPase activating protein 1                              |
| TC10000005 | 0.031643 | 1.75059 | RHEB_cKO up vs WT | 0.807838 +3σ | ---          | ---      | ---      | Gm7399    | predicted gene 7399                                                          |
| TC0X000021 | 0.031111 | 1.75031 | RHEB_cKO up vs WT | 0.807612 +3σ | X A5 X       | 72065    | 72065    | Rap2c     | RAP2C, member of RAS oncogene family                                         |
| TC01000038 | 0.005442 | 1.75031 | RHEB_cKO up vs WT | 0.807611 +3σ | 1 H6 1 97.   | 54139    | 54139    | Irf6      | interferon regulatory factor 6                                               |
| TC17000011 | 0.052532 | 1.75011 | RHEB_cKO up vs WT | 0.807446 +3σ | 17 17        | 1E+08    | 1E+08    | Snord53   | small nucleolar RNA, C/D box 53                                              |
| TC02000046 | 0.481809 | 1.7499  | RHEB_cKO up vs WT | 0.807276 +3σ | 6 6 59.32 :  | 1.01E+08 | 1.01E+08 | Mir3098   | microRNA 3098                                                                |
| TC12000006 | 0.060475 | 1.74948 | RHEB_cKO up vs WT | 0.806928 +3σ | 12 D2 12     | 108156   | 108156   | Mthfd1    | methylenetetrahydrofolate dehydrogenase (NADP+ dependent), methenyltetra     |
| TC0Y000001 | 0.000742 | 1.74915 | RHEB_cKO up vs WT | 0.806658 +3σ | Y Y          | 1E+08    | 1E+08    | Gapdh-ps1 | glyceraldehyde-3-phosphate dehydrogenase, pseudogene 15                      |
| TC16000005 | 0.000449 | 1.74907 | RHEB_cKO up vs WT | 0.806585 +3σ | 16 B3 16     | 433016   | 433016   | Gm5483    | predicted gene 5483                                                          |
| TC03000026 | 0.004244 | 1.74836 | RHEB_cKO up vs WT | 0.806 +3σ    | 3 3 F3       | 53975    | 53975    | Ddx20     | DEAD (Asp-Glu-Ala-Asp) box polypeptide 20                                    |
| TC09000013 | 0.004578 | 1.74833 | RHEB_cKO up vs WT | 0.805974 +3σ | 9 F1-F2 9 :  | 15586    | 15586    | Hyal1     | hyaluronoglucosaminidase 1                                                   |
| TC11000042 | 0.007643 | 1.74675 | RHEB_cKO up vs WT | 0.804675 +3σ | 11 E2 11     | 20973    | 20973    | Syngn2    | synaptogyrin 2                                                               |
| TC08000021 | 0.008541 | 1.7466  | RHEB_cKO up vs WT | 0.804549 +3σ | ---          | ---      | ---      | Gm10313   | predicted pseudogene 10313                                                   |
| TC05000024 | 0.006279 | 1.74658 | RHEB_cKO up vs WT | 0.804531 +3σ | 5 C1 5       | 666377   | 666377   | Gm8069    | predicted pseudogene 8069                                                    |
| TC05000000 | 9.38E-05 | 1.74652 | RHEB_cKO up vs WT | 0.804487 +3σ | ---          | ---      | ---      | Tubb4b-ps | tubulin, beta 4B class IVB, pseudogene 1                                     |
| TC09000032 | 0.006398 | 1.74643 | RHEB_cKO up vs WT | 0.804407 +3σ | 9 F3 9       | 108737   | 108737   | Oxsr1     | oxidative-stress responsive 1                                                |
| TC01000006 | 0.021279 | 1.74617 | RHEB_cKO up vs WT | 0.804195 +3σ | 1 C4 1 40.   | 195434   | 195434   | Utp14b    | UTP14B small subunit processome component                                    |
| TC05000015 | 0.019266 | 1.74565 | RHEB_cKO up vs WT | 0.803767 +3σ | ---          | ---      | ---      | Gm8991    | predicted pseudogene 8991                                                    |
| TC12000023 | 0.011631 | 1.74552 | RHEB_cKO up vs WT | 0.80366 +3σ  | 12 F1 12 :   | 15519    | 15519    | Hsp90aa1  | heat shock protein 90, alpha (cytosolic), class A member 1                   |
| TC19000004 | 0.031111 | 1.74522 | RHEB_cKO up vs WT | 0.803405 +3σ | 19 C1 19     | 59028    | 59028    | Rcl1      | RNA terminal phosphate cyclase-like 1                                        |
| TC0X000020 | 0.005547 | 1.74504 | RHEB_cKO up vs WT | 0.803257 +3σ | X A3.3 X     | 77286    | 77286    | Nkrf      | NF-kappaB repressing factor                                                  |
| TC12000023 | 0.192822 | 1.74473 | RHEB_cKO up vs WT | 0.803004 +3σ | 12 12 59.1 : | 1.01E+08 | 1.01E+08 | Gm19576   | predicted gene, 19576                                                        |
| TC07000024 | 0.064932 | 1.74432 | RHEB_cKO up vs WT | 0.802662 +3σ | 7 A2 7 8.6   | 259300   | 259300   | Ehd2      | EH-domain containing 2                                                       |
| TC14000013 | 0.018939 | 1.74379 | RHEB_cKO up vs WT | 0.802227 +3σ | ---          | ---      | ---      | Gm6254    | predicted gene 6254                                                          |
| TC19000006 | 0.00933  | 1.74373 | RHEB_cKO up vs WT | 0.802178 +3σ | 19 19 D1     | 93685    | 93685    | Entpd7    | ectonucleoside triphosphate diphosphohydrolase 7                             |
| TC05000004 | 0.002707 | 1.74359 | RHEB_cKO up vs WT | 0.802058 +3σ | 5 B3 5 20.   | 17089    | 17089    | Lyar      | Ly1 antibody reactive clone                                                  |
| TC08000003 | 0.031593 | 1.74317 | RHEB_cKO up vs WT | 0.801711 +3σ | 8 A4 8 20.   | 14782    | 14782    | Gsr       | glutathione reductase                                                        |
| TC13000005 | 0.006286 | 1.74277 | RHEB_cKO up vs WT | 0.801383 +3σ | 13 A5 13 :   | 16468    | 16468    | Jarid2    | jumonji, AT rich interactive domain 2                                        |
| TC02000032 | 0.001746 | 1.74227 | RHEB_cKO up vs WT | 0.800969 +3σ | ---          | ---      | ---      | Gm13394   | predicted gene 13394                                                         |
| TC11000036 | 0.008961 | 1.74151 | RHEB_cKO up vs WT | 0.800336 +3σ | 11 D 11 60   | 19155    | 19155    | Npepps    | aminopeptidase puromycin sensitive                                           |
| TC13000014 | 0.011777 | 1.74143 | RHEB_cKO up vs WT | 0.800276 +3σ | 13 A1 13     | 69237    | 69237    | Gtpbp4    | GTP binding protein 4                                                        |
| TC13000006 | 0.001286 | 1.74116 | RHEB_cKO up vs WT | 0.800045 +3σ | 13 B1 13 :   | 14057    | 14057    | Sfxn1     | sideroflexin 1                                                               |
| TC10000013 | 0.013175 | 1.73999 | RHEB_cKO up vs WT | 0.799078 +3σ | 10 D2 10 :   | 52705    | 52705    | Krr1      | KRR1, small subunit (SSU) processome component, homolog (yeast)              |
| TC19000007 | 0.001299 | 1.73962 | RHEB_cKO up vs WT | 0.798775 +3σ | 19 19 D2     | 20874    | 20874    | Slk       | STE20-like kinase                                                            |
| TC03000020 | 0.002508 | 1.73694 | RHEB_cKO up vs WT | 0.796548 +3σ | ---          | ---      | ---      | Gm8349    | predicted gene 8349                                                          |
| TC19000001 | 0.05434  | 1.73631 | RHEB_cKO up vs WT | 0.796022 +3σ | ---          | ---      | ---      | Pcna-ps2  | proliferating cell nuclear antigen pseudogene 2                              |
| TC07000003 | 0.002363 | 1.73609 | RHEB_cKO up vs WT | 0.795845 +3σ | 7 A3 7       | 72434    | 72434    | Lypd3     | Ly6/Plaur domain containing 3                                                |
| TC16000014 | 0.067744 | 1.73609 | RHEB_cKO up vs WT | 0.795841 +3σ | 16 B2 16     | 224088   | 224088   | Atp13a3   | ATPase type 13A3                                                             |
| TC13000023 | 0.007007 | 1.73505 | RHEB_cKO up vs WT | 0.79498 +3σ  | 13 C1 13     | 18570    | 18570    | Pdcd6     | programmed cell death 6                                                      |
| TC12000004 | 0.013803 | 1.73496 | RHEB_cKO up vs WT | 0.794901 +3σ | 12 C1 12     | 1E+08    | 1E+08    | 170004711 | RIKEN cDNA 170004711 gene 2                                                  |
| TC10000008 | 0.011553 | 1.73489 | RHEB_cKO up vs WT | 0.794841 +3σ | 10 C1 10 :   | 19205    | 19205    | Ptbp1     | polypyrimidine tract binding protein 1                                       |
| TC03000005 | 0.01123  | 1.73474 | RHEB_cKO up vs WT | 0.794719 +3σ | 3 E1 3 30.   | 28030    | 28030    | Gfm1      | G elongation factor, mitochondrial 1                                         |
| TC12000023 | 0.262738 | 1.73331 | RHEB_cKO up vs WT | 0.793526 +3σ | 12 F1 12     | 70059    | 70059    | Degs2     | delta(4)-desaturase, sphingolipid 2                                          |
| TC17000001 | 0.011695 | 1.73296 | RHEB_cKO up vs WT | 0.79324 +3σ  | 17 A2 17 :   | 12648    | 12648    | Chd1      | chromodomain helicase DNA binding protein 1                                  |
| TC05000014 | 0.004764 | 1.73289 | RHEB_cKO up vs WT | 0.79318 +3σ  | 5 G1.2 5     | 319804   | 319804   | Glt1d1    | glycosyltransferase 1 domain containing 1                                    |
| TC17000027 | 0.003054 | 1.73232 | RHEB_cKO up vs WT | 0.792709 +3σ | 17 E4 17 :   | 225055   | 225055   | Fbxo11    | F-box protein 11                                                             |
| TSUnmappe  | 0.019275 | 1.73205 | RHEB_cKO up vs WT | 0.792482 +3σ | 13 13 A3.:   | 13557    | 13557    | E2f3      | E2F transcription factor 3                                                   |
| TC05000016 | 0.005315 | 1.73183 | RHEB_cKO up vs WT | 0.792297 +3σ | 5 G2 5 78.   | 27979    | 27979    | Eif3b     | eukaryotic translation initiation factor 3, subunit B                        |

|            |          |         |                   |              |            |          |          |           |                                                                                |
|------------|----------|---------|-------------------|--------------|------------|----------|----------|-----------|--------------------------------------------------------------------------------|
| TC0900002  | 0.029087 | 1.7315  | RHEB_cKO up vs WT | 0.792021 +3σ | 9 A5.3 9   | 77591    | 77591    | Ddx10     | DEAD (Asp-Glu-Ala-Asp) box polypeptide 10                                      |
| TC03000012 | 0.007727 | 1.73126 | RHEB_cKO up vs WT | 0.791826 +3σ | 3 G1-G2 3  | 108058   | 108058   | Camk2d    | calcium/calmodulin-dependent protein kinase II, delta                          |
| TC0500002C | 0.00407  | 1.73122 | RHEB_cKO up vs WT | 0.79179 +3σ  | 5 A3 5 10. | 20817    | 20817    | Srpk2     | serine/arginine-rich protein specific kinase 2                                 |
| TC15000002 | 0.004817 | 1.73118 | RHEB_cKO up vs WT | 0.791752 +3σ | 15 15 B3.5 | 67724    | 67724    | Pop1      | processing of precursor 1, ribonuclease P/MRP family, ( <i>S. cerevisiae</i> ) |
| TC0700002C | 0.00011  | 1.73051 | RHEB_cKO up vs WT | 0.791194 +3σ | 7 F5 7     | 56460    | 56460    | Pkp3      | plakophilin 3                                                                  |
| TC1500001E | 0.060001 | 1.73015 | RHEB_cKO up vs WT | 0.7909 +3σ   | 15 D2 15   | 17988    | 17988    | Ndrp1     | N-myc downstream regulated gene 1                                              |
| TC17000004 | 0.012425 | 1.72957 | RHEB_cKO up vs WT | 0.790415 +3σ | ---        | ---      | ---      | Gm16580   | predicted gene 16580                                                           |
| TC1300001C | 0.022238 | 1.72952 | RHEB_cKO up vs WT | 0.790372 +3σ | 13 D1 13   | 68018    | 68018    | Col4a3bp  | collagen, type IV, alpha 3 (Goodpasture antigen) binding protein               |
| TC1800001C | 0.040502 | 1.72864 | RHEB_cKO up vs WT | 0.789633 +3σ | ---        | ---      | ---      | Gm7665    | predicted pseudogene 7665                                                      |
| TC17000001 | 0.016058 | 1.72677 | RHEB_cKO up vs WT | 0.788077 +3σ | 17 17      | 1E+08    | 1E+08    | Snora20   | small nucleolar RNA, H/ACA box 20                                              |
| TC1000000C | 0.004372 | 1.72656 | RHEB_cKO up vs WT | 0.7879 +3σ   | 10 A1 10   | 270685   | 270685   | Mthfd1l   | methylenetetrahydrofolate dehydrogenase (NADP+ dependent) 1-like               |
| TC11000001 | 0.01274  | 1.72515 | RHEB_cKO up vs WT | 0.786721 +3σ | 11 A1-A4   | 13649    | 13649    | Egfr      | epidermal growth factor receptor                                               |
| TC0100002E | 0.007971 | 1.72503 | RHEB_cKO up vs WT | 0.786624 +3σ | 1 B 1      | 14200    | 14200    | Fhl2      | four and a half LIM domains 2                                                  |
| TC0700003E | 0.007173 | 1.72495 | RHEB_cKO up vs WT | 0.786551 +3σ | ---        | ---      | ---      | Gm3200    | predicted pseudogene 3200                                                      |
| TC1300000C | 0.007919 | 1.72436 | RHEB_cKO up vs WT | 0.78606 +3σ  | 13 A1 13   | 69617    | 69617    | Pitrm1    | pitrilysin metallopeptidase 1                                                  |
| TC1500002E | 0.034275 | 1.72372 | RHEB_cKO up vs WT | 0.785527 +3σ | ---        | 1.02E+08 | 1.02E+08 | Mir6963   | microRNA 6963                                                                  |
| TC0800001C | 0.00341  | 1.72365 | RHEB_cKO up vs WT | 0.785463 +3σ | 8 C3 8     | 257632   | 257632   | Nod2      | nucleotide-binding oligomerization domain containing 2                         |
| TC15000014 | 0.002622 | 1.72352 | RHEB_cKO up vs WT | 0.785362 +3σ | 15 B3.1 15 | 70790    | 70790    | Ubr5      | ubiquitin protein ligase E3 component n-recogin 5                              |
| TC1100003E | 0.002687 | 1.72346 | RHEB_cKO up vs WT | 0.785304 +3σ | 11 E1 11   | 16647    | 16647    | Kpna2     | karyopherin (importin) alpha 2                                                 |
| TC19000002 | 0.039796 | 1.72204 | RHEB_cKO up vs WT | 0.784115 +3σ | 19 A 19    | 225929   | 225929   | Pat1l     | protein associated with topoisomerase II homolog 1 (yeast)                     |
| TC0300001E | 0.016905 | 1.72109 | RHEB_cKO up vs WT | 0.78332 +3σ  | ---        | ---      | ---      | Gm10254   | predicted gene 10254                                                           |
| TC0100000E | 0.008977 | 1.72088 | RHEB_cKO up vs WT | 0.783147 +3σ | ---        | ---      | ---      | Gm15659   | predicted gene 15659                                                           |
| TC0900000E | 0.003702 | 1.72082 | RHEB_cKO up vs WT | 0.783096 +3σ | ---        | 1.01E+08 | 1.01E+08 | LOC10086  | NHP2-like protein 1                                                            |
| TC04000011 | 0.002367 | 1.72027 | RHEB_cKO up vs WT | 0.782639 +3σ | 4 C7 4     | 16975    | 16975    | Lrp8      | low density lipoprotein receptor-related protein 8, apolipoprotein e receptor  |
| TC0300002E | 0.019507 | 1.72015 | RHEB_cKO up vs WT | 0.782532 +3σ | 3 G3 3     | 99683    | 99683    | Sec24b    | Sec24 related gene family, member B ( <i>S. cerevisiae</i> )                   |
| TC0900001E | 0.008785 | 1.7201  | RHEB_cKO up vs WT | 0.782491 +3σ | 9 F1 9 59. | 19882    | 19882    | Mst1r     | macrophage stimulating 1 receptor (c-met-related tyrosine kinase)              |
| TC1500001E | 0.005076 | 1.71997 | RHEB_cKO up vs WT | 0.782385 +3σ | 15 15 C    | 18458    | 18458    | Pabpc1    | poly(A) binding protein, cytoplasmic 1                                         |
| TC1100002E | 0.005028 | 1.71958 | RHEB_cKO up vs WT | 0.782056 +3σ | ---        | ---      | ---      | Gm12286   | predicted gene 12286                                                           |
| TC1900000E | 0.024303 | 1.71958 | RHEB_cKO up vs WT | 0.782053 +3σ | 19 B 19    | 83921    | 83921    | Tmem2     | transmembrane protein 2                                                        |
| TC0400001E | 0.011962 | 1.71909 | RHEB_cKO up vs WT | 0.781641 +3σ | 4 D2.2-D2. | 80912    | 80912    | Pum1      | pumilio RNA-binding family member 1                                            |
| TC17000002 | 0.015349 | 1.71889 | RHEB_cKO up vs WT | 0.781474 +3σ | 17 A3.2 17 | 22710    | 22710    | Zfp52     | zinc finger protein 52                                                         |
| TC07000011 | 0.079156 | 1.71847 | RHEB_cKO up vs WT | 0.781127 +3σ | 7 D3 7     | 18584    | 18584    | Pde8a     | phosphodiesterase 8A                                                           |
| TC0500001E | 0.00571  | 1.71795 | RHEB_cKO up vs WT | 0.780684 +3σ | 5 G1.3 5   | 12466    | 12466    | Cct6a     | chaperonin containing Tcp1, subunit 6a (zeta)                                  |
| TC1700001E | 0.045184 | 1.71764 | RHEB_cKO up vs WT | 0.780426 +3σ | 17 A3.3 17 | 1E+08    | 1E+08    | Snora78   | small nucleolar RNA, H/ACA box 7                                               |
| TC02000037 | 0.001342 | 1.71562 | RHEB_cKO up vs WT | 0.778727 +3σ | ---        | ---      | ---      | Gm13642   | predicted gene 13642                                                           |
| TC09000001 | 0.038058 | 1.71534 | RHEB_cKO up vs WT | 0.778495 +3σ | ---        | ---      | ---      | Gm23455   | predicted gene, 23455                                                          |
| TC1300002E | 0.00429  | 1.71504 | RHEB_cKO up vs WT | 0.778242 +3σ | ---        | ---      | ---      | Gm2445    | predicted gene 2445                                                            |
| TC1600001E | 0.008062 | 1.71493 | RHEB_cKO up vs WT | 0.778149 +3σ | 16 A1 16 2 | 17470    | 17470    | Cd200     | CD200 antigen                                                                  |
| TC0100003E | 0.004096 | 1.7136  | RHEB_cKO up vs WT | 0.777032 +3σ | 1 1 H1     | 12301    | 12301    | Cacybp    | calcyclin binding protein                                                      |
| TC1600000E | 0.153897 | 1.71352 | RHEB_cKO up vs WT | 0.776962 +3σ | 16 C3.3 16 | 117172   | 117172   | 2310034C  | RIKEN cDNA 2310034C09 gene                                                     |
| TC1100000C | 0.0349   | 1.71302 | RHEB_cKO up vs WT | 0.776545 +3σ | 11 A1 11   | 74522    | 74522    | Morc2a    | microrchidia 2A                                                                |
| TC0100003C | 0.01575  | 1.71292 | RHEB_cKO up vs WT | 0.776459 +3σ | 1 E4 1     | 226419   | 226419   | Dyrk3     | dual-specificity tyrosine-(Y)-phosphorylation regulated kinase 3               |
| TC0600002E | 0.002264 | 1.71268 | RHEB_cKO up vs WT | 0.776254 +3σ | ---        | ---      | ---      | Gm5138    | predicted gene 5138                                                            |
| TC0400000E | 0.003543 | 1.71186 | RHEB_cKO up vs WT | 0.775566 +3σ | ---        | ---      | ---      | Gm12416   | predicted gene 12416                                                           |
| TC02000017 | 0.023389 | 1.71151 | RHEB_cKO up vs WT | 0.775274 +3σ | 2 E5 2     | 1E+08    | 1E+08    | Inafm2    | InaF motif containing 2                                                        |
| TC10000017 | 0.010287 | 1.71149 | RHEB_cKO up vs WT | 0.775255 +3σ | ---        | ---      | ---      | Gm8330    | predicted gene 8330                                                            |
| TC10000024 | 0.000194 | 1.71123 | RHEB_cKO up vs WT | 0.775032 +3σ | 10 C1 10   | 70294    | 70294    | Rnf126    | ring finger protein 126                                                        |
| TC0700001E | 0.00997  | 1.71046 | RHEB_cKO up vs WT | 0.774387 +3σ | 7 F3 7 74. | 12237    | 12237    | Bub3      | BUB3 mitotic checkpoint protein                                                |
| TC0800001E | 0.012864 | 1.70999 | RHEB_cKO up vs WT | 0.773992 +3σ | 8 A1.3 8   | 244334   | 244334   | Defb8     | defensin beta 8                                                                |
| TC0500001E | 0.064282 | 1.70961 | RHEB_cKO up vs WT | 0.773671 +3σ | 5 A3 5 8.1 | 14677    | 14677    | Gnai1     | guanine nucleotide binding protein (G protein), alpha inhibiting 1             |
| TC1700002E | 0.001674 | 1.70782 | RHEB_cKO up vs WT | 0.772157 +3σ | 17 E3 17   | 668830   | 668830   | Gm9386    | predicted pseudogene 9386                                                      |
| TC1800000E | 0.012226 | 1.7076  | RHEB_cKO up vs WT | 0.771967 +3σ | ---        | ---      | ---      | Gm5507    | predicted gene 5507                                                            |
| TC0X00001E | 0.04753  | 1.70732 | RHEB_cKO up vs WT | 0.771734 +3σ | X A1.1 X 8 | 12361    | 12361    | Cask      | calcium/calmodulin-dependent serine protein kinase (MAGUK family)              |
| TC04000002 | 0.003407 | 1.70711 | RHEB_cKO up vs WT | 0.771557 +3σ | ---        | ---      | ---      | Gm11912   | predicted gene 11912                                                           |
| TC1400000E | 0.030595 | 1.70683 | RHEB_cKO up vs WT | 0.771318 +3σ | 14 C1 14   | 218975   | 218975   | Mapk1ip1  | mitogen-activated protein kinase 1 interacting protein 1-like                  |
| TC0300003E | 0.009849 | 1.70539 | RHEB_cKO up vs WT | 0.770099 +3σ | 3 F2.2 3   | 70465    | 70465    | Wdr77     | WD repeat domain 77                                                            |
| TC0700000E | 0.005705 | 1.70535 | RHEB_cKO up vs WT | 0.770071 +3σ | 7 B4 7 29. | 211548   | 211548   | Nomo1     | nodal modulator 1                                                              |
| TC1200002E | 0.016663 | 1.70496 | RHEB_cKO up vs WT | 0.769742 +3σ | 12 A1.2 12 | 211914   | 211914   | Asap2     | ArfGAP with SH3 domain, ankyrin repeat and PH domain 2                         |
| TC15000017 | 0.008213 | 1.70485 | RHEB_cKO up vs WT | 0.769643 +3σ | 15 D3 15 5 | 17068    | 17068    | Ly6d      | lymphocyte antigen 6 complex, locus D                                          |
| TC0500001E | 0.031196 | 1.70447 | RHEB_cKO up vs WT | 0.769327 +3σ | ---        | ---      | ---      | Gm7332    | predicted gene 7332                                                            |
| TC1700002E | 0.021238 | 1.70429 | RHEB_cKO up vs WT | 0.769167 +3σ | 17 E4 17   | 72416    | 72416    | Lrpprc    | leucine-rich PPR-motif containing                                              |
| TC18000014 | 0.003732 | 1.7042  | RHEB_cKO up vs WT | 0.769097 +3σ | 18 18 D3   | 17714    | 17714    | Grpel2    | GrpE-like 2, mitochondrial                                                     |
| TC10000027 | 0.112755 | 1.70326 | RHEB_cKO up vs WT | 0.768295 +3σ | 10 10      | 1E+08    | 1E+08    | Snord98   | small nucleolar RNA, C/D box 98                                                |
| TC10000027 | 0.058766 | 1.7023  | RHEB_cKO up vs WT | 0.767487 +3σ | 10 10      | 71207    | 71207    | Nudt4     | nudix (nucleoside diphosphate linked moiety X)-type motif 4                    |
| TC0600001E | 0.034799 | 1.7023  | RHEB_cKO up vs WT | 0.767482 +3σ | ---        | ---      | ---      | Gm20400   | predicted gene 20400                                                           |
| TC0100001E | 0.02896  | 1.70227 | RHEB_cKO up vs WT | 0.767464 +3σ | ---        | ---      | ---      | Gm6397    | predicted gene 6397                                                            |
| TC02000054 | 0.013897 | 1.70166 | RHEB_cKO up vs WT | 0.76694 +3σ  | 2 B 2      | 227699   | 227699   | Nup188    | nucleoporin 188                                                                |
| TC0300000E | 0.002944 | 1.70072 | RHEB_cKO up vs WT | 0.766148 +3σ | ---        | ---      | ---      | Gm10293   | predicted pseudogene 10293                                                     |
| TC0800001C | 0.020283 | 1.70071 | RHEB_cKO up vs WT | 0.766141 +3σ | 8 C5 8     | 270086   | 270086   | Ogfd1     | 2-oxoglutarate and iron-dependent oxygenase domain containing 1                |
| TC02000017 | 0.052011 | 1.70022 | RHEB_cKO up vs WT | 0.765726 +3σ | 2 E5 2     | 271842   | 271842   | Rpusd2    | RNA pseudouridylate synthase domain containing 2                               |
| TC1000002E | 0.003142 | 1.70021 | RHEB_cKO up vs WT | 0.765715 +3σ | 10 C1 10   | 208228   | 208228   | Mob3a     | MOB kinase activator 3A                                                        |
| TC19000007 | 0.01405  | 1.69984 | RHEB_cKO up vs WT | 0.765397 +3σ | 19 C3 19   | 226182   | 226182   | Taf5      | TATA-box binding protein associated factor 5                                   |
| TC0800003C | 0.007823 | 1.6994  | RHEB_cKO up vs WT | 0.765021 +3σ | 8 E1 8     | 142682   | 142682   | Zcchc14   | zinc finger, CCHC domain containing 14                                         |
| TC0300002E | 0.045978 | 1.69839 | RHEB_cKO up vs WT | 0.764164 +3σ | 3 G3 3 62. | 18033    | 18033    | Nfkb1     | nuclear factor of kappa light polypeptide gene enhancer in B cells 1, p105     |
| TC1900000C | 0.001283 | 1.69735 | RHEB_cKO up vs WT | 0.763288 +3σ | 19 A 19    | 12631    | 12631    | Cfl1      | cofilin 1, non-muscle                                                          |
| TC12000014 | 0.003915 | 1.69715 | RHEB_cKO up vs WT | 0.763112 +3σ | 12 A1.1 12 | 627110   | 627110   | Tubb2a-ps | tubulin, beta 2a, pseudogene 2                                                 |
| TC16000014 | 0.008523 | 1.69684 | RHEB_cKO up vs WT | 0.762848 +3σ | 16 B1 16 1 | 12053    | 12053    | Bcl6      | B cell leukemia/lymphoma 6                                                     |
| TC1700001C | 0.002924 | 1.69659 | RHEB_cKO up vs WT | 0.762642 +3σ | ---        | ---      | ---      | Gm27023   | predicted gene, 27023                                                          |
| TC1700000E | 0.005941 | 1.69646 | RHEB_cKO up vs WT | 0.762527 +3σ | 17 B1 17   | 72462    | 72462    | Rrp1b     | ribosomal RNA processing 1 homolog B ( <i>S. cerevisiae</i> )                  |
| TC13000012 | 0.015289 | 1.6963  | RHEB_cKO up vs WT | 0.76239 +3σ  | 13 D2.1 13 | 75616    | 75616    | Smim15    | small integral membrane protein 15                                             |
| TC1100000E | 0.013913 | 1.69616 | RHEB_cKO up vs WT | 0.762269 +3σ | 11 11      | 1E+08    | 1E+08    | Gm12238   | predicted gene 12238                                                           |
| TC0900001C | 0.044204 | 1.69613 | RHEB_cKO up vs WT | 0.762247 +3σ | 9 E1 9     | 14860    | 14860    | Gsta4     | glutathione S-transferase, alpha 4                                             |
| TC0700002E | 0.003004 | 1.69594 | RHEB_cKO up vs WT | 0.762083 +3σ | ---        | ---      | ---      | Gm2308    | predicted gene 2308                                                            |
| TC0500000E | 0.002875 | 1.69524 | RHEB_cKO up vs WT | 0.761491 +3σ | ---        | ---      | ---      | Gm5559    | predicted gene 5559                                                            |
| TC09000014 | 0.001368 | 1.69486 | RHEB_cKO up vs WT | 0.761168 +3σ | 9 F2 9 59. | 235623   | 235623   | Scap      | SREBF chaperone                                                                |
| TC05000022 | 0.001473 | 1.69464 | RHEB_cKO up vs WT | 0.760981 +3σ | 5 B3 5 21. | 15476    | 15476    | Hs3st1    | heparan sulfate (glucosamine) 3-O-sulfotransferase 1                           |
| TC0600001C | 0.001895 | 1.69416 | RHEB_cKO up vs WT | 0.760569 +3σ | ---        | ---      | ---      | Gm4575    | predicted gene 4575                                                            |
| TC1000000E | 0.00721  | 1.69396 | RHEB_cKO up vs WT | 0.7604 +3σ   | ---        | ---      | ---      | Gm8055    | predicted pseudogene 8055                                                      |
| TC0700002C | 0.029156 | 1.69291 | RHEB_cKO up vs WT | 0.759503 +3σ | 7 F5 7     | 11772    | 11772    | Ap2a2     | adaptor-related protein complex 2, alpha 2 subunit                             |

|            |          |         |                   |              |            |          |          |           |                                                                                 |
|------------|----------|---------|-------------------|--------------|------------|----------|----------|-----------|---------------------------------------------------------------------------------|
| TC01000005 | 0.06866  | 1.69228 | RHEB_cKO up vs WT | 0.758965 +3σ | ---        | ---      | ---      | Gm26457   | predicted gene, 26457                                                           |
| TC0X000003 | 0.003435 | 1.69189 | RHEB_cKO up vs WT | 0.758633 +3σ | X A4 X 21. | 11740    | 11740    | Slc25a5   | solute carrier family 25 (mitochondrial carrier, adenine nucleotide translocato |
| TC13000027 | 0.119202 | 1.69182 | RHEB_cKO up vs WT | 0.758576 +3σ | 13 D2.2 1: | 14313    | 14313    | Fst       | folistatin                                                                      |
| TC08000008 | 0.007143 | 1.69178 | RHEB_cKO up vs WT | 0.758545 +3σ | ---        | ---      | ---      | Gm7984    | predicted gene 7984                                                             |
| TC1800001C | 0.00393  | 1.6916  | RHEB_cKO up vs WT | 0.758387 +3σ | 18 A2 18   | 106957   | 106957   | Slc39a6   | solute carrier family 39 (metal ion transporter), member 6                      |
| TC0300002f | 0.002701 | 1.6904  | RHEB_cKO up vs WT | 0.757365 +3σ | 3 3 F3     | 15257    | 15257    | Hipk1     | homeodomain interacting protein kinase 1                                        |
| TC15000004 | 0.015014 | 1.69017 | RHEB_cKO up vs WT | 0.757172 +3σ | 15 D1 15   | 76740    | 76740    | Efr3a     | EFR3 homolog A                                                                  |
| TC03000004 | 0.027065 | 1.68986 | RHEB_cKO up vs WT | 0.756901 +3σ | 3 E1 3     | 74012    | 74012    | Rap2b     | RAP2B, member of RAS oncogene family                                            |
| TC14000004 | 0.018571 | 1.68952 | RHEB_cKO up vs WT | 0.756613 +3σ | ---        | ---      | ---      | Gm7324    | predicted gene 7324                                                             |
| TC09000008 | 0.10063  | 1.68918 | RHEB_cKO up vs WT | 0.756325 +3σ | ---        | ---      | ---      | Gm23136   | predicted gene, 23136                                                           |
| TC01000031 | 0.101195 | 1.68872 | RHEB_cKO up vs WT | 0.755932 +3σ | 1 E4 1     | 329252   | 329252   | Lgr6      | leucine-rich repeat-containing G protein-coupled receptor 6                     |
| TC02000021 | 0.064496 | 1.68864 | RHEB_cKO up vs WT | 0.755865 +3σ | 2 2 H1     | 24128    | 24128    | Xrn2      | 5'-3' exoribonuclease 2                                                         |
| TC1500002C | 0.036646 | 1.68798 | RHEB_cKO up vs WT | 0.755294 +3σ | 15 E3 15   | 105847   | 105847   | Lmf2      | lipase maturation factor 2                                                      |
| TC02000047 | 0.014327 | 1.68796 | RHEB_cKO up vs WT | 0.75528 +3σ  | 2 2 G3     | 66580    | 66580    | Esf1      | ESF1 nucleolar pre-rRNA processing protein homolog                              |
| TC1700001f | 0.033865 | 1.68773 | RHEB_cKO up vs WT | 0.755082 +3σ | 6 6 B1     | 68011    | 68011    | Snrpg     | small nuclear ribonucleoprotein polypeptide G                                   |
| TC0200003f | 0.006966 | 1.68691 | RHEB_cKO up vs WT | 0.754387 +3σ | 2 2 C3     | 56878    | 56878    | Rbms1     | RNA binding motif, single stranded interacting protein 1                        |
| TC0400003C | 0.001092 | 1.6866  | RHEB_cKO up vs WT | 0.754118 +3σ | ---        | ---      | ---      | Gm12671   | predicted gene 12671                                                            |
| TC03000012 | 0.015913 | 1.68657 | RHEB_cKO up vs WT | 0.75409 +3σ  | 3 G1 3     | 99480    | 99480    | Dnttp2    | deoxynucleotidyltransferase, terminal, interacting protein 2                    |
| TC0200004f | 0.000457 | 1.68649 | RHEB_cKO up vs WT | 0.754021 +3σ | 2 G3 2 73. | 21824    | 21824    | Thbd      | thrombomodulin                                                                  |
| TC02000047 | 0.002105 | 1.68635 | RHEB_cKO up vs WT | 0.753908 +3σ | ---        | ---      | ---      | Gm14111   | predicted gene 14111                                                            |
| TC07000004 | 0.012584 | 1.68623 | RHEB_cKO up vs WT | 0.753801 +3σ | 7 A3 7 13. | 21803    | 21803    | Tgfb1     | transforming growth factor, beta 1                                              |
| TC1100001C | 0.032688 | 1.68599 | RHEB_cKO up vs WT | 0.753595 +3σ | 11 B4 11 4 | 246788   | 246788   | Trpv3     | transient receptor potential cation channel, subfamily V, member 3              |
| TC16000012 | 0.006211 | 1.68573 | RHEB_cKO up vs WT | 0.753372 +3σ | 16 A1 16   | 106205   | 106205   | Zc3h7a    | zinc finger CCCH type containing 7 A                                            |
| TC08000002 | 0.019315 | 1.68511 | RHEB_cKO up vs WT | 0.752845 +3σ | 8 A2 8 11. | 20516    | 20516    | Slc20a2   | solute carrier family 20, member 2                                              |
| TC13000001 | 0.028986 | 1.68421 | RHEB_cKO up vs WT | 0.75207 +3σ  | 13 A2-A3   | 319191   | 319191   | Hist1h2ai | histone cluster 1, H2ai                                                         |
| TC1600001f | 0.004132 | 1.68405 | RHEB_cKO up vs WT | 0.751938 +3σ | 16 C3.3 1f | 12469    | 12469    | Cct8      | chaperonin containing Tcp1, subunit 8 (theta)                                   |
| TC0100002f | 0.003468 | 1.68309 | RHEB_cKO up vs WT | 0.751109 +3σ | ---        | ---      | ---      | Gm5529    | predicted pseudogene 5529                                                       |
| TC01000002 | 0.031118 | 1.68306 | RHEB_cKO up vs WT | 0.751091 +3σ | 1 B 1      | 50785    | 50785    | Hs6st1    | heparan sulfate 6-O-sulfotransferase 1                                          |
| TC04000017 | 0.03569  | 1.68267 | RHEB_cKO up vs WT | 0.750753 +3σ | 4 D3 4 69. | 15530    | 15530    | Hspg2     | perlecan (heparan sulfate proteoglycan 2)                                       |
| TC0900000C | 0.004625 | 1.68247 | RHEB_cKO up vs WT | 0.750578 +3σ | 9 9 A1-A2  | 17386    | 17386    | Mmp13     | matrix metalloproteinase 13                                                     |
| TC0300002C | 0.000331 | 1.68213 | RHEB_cKO up vs WT | 0.750286 +3σ | 3 D 3 28.6 | 20439    | 20439    | Siah2     | seven in absentia 2                                                             |
| TC05000034 | 0.01899  | 1.68201 | RHEB_cKO up vs WT | 0.750183 +3σ | ---        | ---      | ---      | Gm15502   | predicted gene 15502                                                            |
| TC01000037 | 0.011478 | 1.68194 | RHEB_cKO up vs WT | 0.750127 +3σ | 1 H6 1     | 226844   | 226844   | Mfsd7b    | major facilitator superfamily domain containing 7B                              |
| TC0100003f | 0.004426 | 1.68176 | RHEB_cKO up vs WT | 0.74997 +3σ  | 1 1 80.65  | 1.01E+08 | 1.01E+08 | Gm16340   | interferon-activable protein 203-like                                           |
| TC13000027 | 0.001413 | 1.68174 | RHEB_cKO up vs WT | 0.749958 +3σ | 13 13      | 72465    | 72465    | Zfp131    | zinc finger protein 131                                                         |
| TC03000007 | 0.005667 | 1.68133 | RHEB_cKO up vs WT | 0.749599 +3σ | 3 F1 3     | 66614    | 66614    | Gpatch4   | G patch domain containing 4                                                     |
| TC0500001C | 0.04368  | 1.68117 | RHEB_cKO up vs WT | 0.749465 +3σ | 5 E5 5     | 433926   | 433926   | Lrrc8b    | leucine rich repeat containing 8 family, member B                               |
| TC0800003C | 0.004253 | 1.68104 | RHEB_cKO up vs WT | 0.749357 +3σ | 8 E1 8 71. | 11821    | 11821    | Aprt      | adenine phosphoribosyl transferase                                              |
| TC03000024 | 0.010116 | 1.681   | RHEB_cKO up vs WT | 0.74932 +3σ  | 3 F1-F2 3  | 319176   | 319176   | Hist2h2ac | histone cluster 2, H2ac                                                         |
| TC1200001f | 0.322836 | 1.68037 | RHEB_cKO up vs WT | 0.748776 +3σ | 12 B1 12   | 380755   | 380755   | Lsmem1    | leucine-rich single-pass membrane protein 1                                     |
| TC0X000017 | 0.260775 | 1.68011 | RHEB_cKO up vs WT | 0.748552 +3σ | ---        | ---      | ---      | Gm21887   | predicted gene, 21887                                                           |
| TC01000023 | 0.023889 | 1.68005 | RHEB_cKO up vs WT | 0.748503 +3σ | 1 C1.1 1 2 | 14660    | 14660    | Gls       | glutaminase                                                                     |
| TC1900001f | 0.002016 | 1.67985 | RHEB_cKO up vs WT | 0.748334 +3σ | 19 19 D1   | 66583    | 66583    | Exosc1    | exosome component 1                                                             |
| TC17000021 | 0.004187 | 1.6797  | RHEB_cKO up vs WT | 0.748201 +3σ | 17 C 17    | 20807    | 20807    | Srf       | serum response factor                                                           |
| TC02000052 | 0.096307 | 1.67958 | RHEB_cKO up vs WT | 0.748097 +3σ | 2 H3 2 95. | 12162    | 12162    | Bmp7      | bone morphogenetic protein 7                                                    |
| TC1900001f | 0.010328 | 1.67922 | RHEB_cKO up vs WT | 0.747788 +3σ | 19 D2 19 4 | 1E+08    | 1E+08    | Nutf2-ps1 | nuclear transport factor 2, pseudogene 1                                        |
| TC1300001f | 0.04714  | 1.67905 | RHEB_cKO up vs WT | 0.747646 +3σ | 13 A2-A3   | 319185   | 319185   | Hist1h2bl | histone cluster 1, H2bl                                                         |
| TC04000024 | 0.029822 | 1.6789  | RHEB_cKO up vs WT | 0.747512 +3σ | 4 A5 4 20. | 14595    | 14595    | B4gal1    | UDP-Gal:betaGlcNAc beta 1,4- galactosyltransferase, polypeptide 1               |
| TC04000004 | 0.499126 | 1.67736 | RHEB_cKO up vs WT | 0.746188 +3σ | 4 A5 4     | 1E+08    | 1E+08    | Gm2163    | predicted gene 2163                                                             |
| TC0200002f | 0.016259 | 1.67713 | RHEB_cKO up vs WT | 0.745998 +3σ | 2 H3 2 87. | 110750   | 110750   | Cse1l     | chromosome segregation 1-like (S. cerevisiae)                                   |
| TC05000024 | 0.00031  | 1.67676 | RHEB_cKO up vs WT | 0.74568 +3σ  | 5 C3.1 5   | 212285   | 212285   | Arap2     | ArfGAP with RhoGAP domain, ankyrin repeat and PH domain 2                       |
| TC1400000C | 0.028517 | 1.67671 | RHEB_cKO up vs WT | 0.745629 +3σ | 14 A1 14   | 66082    | 66082    | Abhd6     | abhydrolase domain containing 6                                                 |
| TC15000004 | 0.019933 | 1.6763  | RHEB_cKO up vs WT | 0.74528 +3σ  | 15 D1 15   | 239463   | 239463   | Fam83a    | family with sequence similarity 83, member A                                    |
| TC0100001f | 0.0094   | 1.6761  | RHEB_cKO up vs WT | 0.745109 +3σ | 1 A3 1     | 433273   | 433273   | Gm5523    | glyceraldehyde-3-phosphate dehydrogenase pseudogene                             |
| TC1900000f | 0.01252  | 1.67589 | RHEB_cKO up vs WT | 0.744927 +3σ | 19 C2 19   | 74493    | 74493    | Tnks2     | tankyrase, TRF1-interacting ankyrin-related ADP-ribose polymerase 2             |
| TC1600000f | 0.0216   | 1.67587 | RHEB_cKO up vs WT | 0.744912 +3σ | 16 C3.3 1f | 12013    | 12013    | Bach1     | BTB and CNC homology 1, basic leucine zipper transcription factor 1             |
| TC0800001f | 0.008975 | 1.67578 | RHEB_cKO up vs WT | 0.744831 +3σ | 8 E2 8     | 382038   | 382038   | Urb2      | URB2 ribosome biogenesis 2 homolog (S. cerevisiae)                              |
| TC0700000C | 0.011486 | 1.67542 | RHEB_cKO up vs WT | 0.744527 +3σ | 7 A1 7 2.7 | 19943    | 19943    | Rpl28     | ribosomal protein L28                                                           |
| TC0900001f | 0.066716 | 1.675   | RHEB_cKO up vs WT | 0.744162 +3σ | 9 F1 9     | 235559   | 235559   | Topbp1    | topoisomerase (DNA) II binding protein 1                                        |
| TC0200005C | 0.002015 | 1.67423 | RHEB_cKO up vs WT | 0.743496 +3σ | ---        | ---      | ---      | Gm11451   | predicted gene 11451                                                            |
| TC16000004 | 0.019532 | 1.67413 | RHEB_cKO up vs WT | 0.743409 +3σ | 16 B3 16   | 66667    | 66667    | Hspbap1   | Hspb associated protein 1                                                       |
| TC11000012 | 0.011142 | 1.67401 | RHEB_cKO up vs WT | 0.743305 +3σ | 11 11 B5   | 78394    | 78394    | Ddx52     | DEAD (Asp-Glu-Ala-Asp) box polypeptide 52                                       |
| TC1500001f | 0.005458 | 1.67393 | RHEB_cKO up vs WT | 0.74324 +3σ  | 15 D3 15   | 239528   | 239528   | Ago2      | argonaute RISC catalytic subunit 2                                              |
| TC1700001f | 0.00086  | 1.67311 | RHEB_cKO up vs WT | 0.742532 +3σ | 17 A1 17   | 22350    | 22350    | Ezr       | ezrin                                                                           |
| TC1400000f | 0.053223 | 1.67247 | RHEB_cKO up vs WT | 0.741982 +3σ | 14 C1 14 2 | 93834    | 93834    | Peli2     | pellino 2                                                                       |
| TC0X000032 | 0.038598 | 1.67232 | RHEB_cKO up vs WT | 0.741855 +3σ | X F4 X 72. | 20603    | 20603    | Sms       | spermine synthase                                                               |
| TC07000023 | 0.066051 | 1.6717  | RHEB_cKO up vs WT | 0.741318 +3σ | ---        | ---      | ---      | Gm10179   | predicted gene 10179                                                            |
| TC1000000C | 0.004368 | 1.67163 | RHEB_cKO up vs WT | 0.741252 +3σ | 10 A1 10   | 69912    | 69912    | Nup43     | nucleoporin 43                                                                  |
| TC08000023 | 0.015308 | 1.67123 | RHEB_cKO up vs WT | 0.740908 +3σ | 8 B3.1 8   | 77113    | 77113    | Klhl2     | kelch-like 2, Mayven                                                            |
| TC0200005C | 0.001988 | 1.67122 | RHEB_cKO up vs WT | 0.740905 +3σ | ---        | ---      | ---      | Gm14287   | predicted gene 14287                                                            |
| TC1000002C | 0.013607 | 1.67035 | RHEB_cKO up vs WT | 0.74015 +3σ  | 10 B1 10   | 67239    | 67239    | Rpf2      | ribosome production factor 2 homolog                                            |
| TC1600001f | 0.016564 | 1.6703  | RHEB_cKO up vs WT | 0.740103 +3σ | 16 B3 16   | 1E+08    | 1E+08    | BC100530  | cDNA sequence BC100530                                                          |
| TC19000011 | 0.023421 | 1.67022 | RHEB_cKO up vs WT | 0.740041 +3σ | 19 A 19 9. | 21888    | 21888    | Tle4      | transducin-like enhancer of split 4                                             |
| TC03000007 | 0.005839 | 1.67001 | RHEB_cKO up vs WT | 0.739857 +3σ | 3 F 3 38.7 | 12462    | 12462    | Cct3      | chaperonin containing Tcp1, subunit 3 (gamma)                                   |
| TC0700002f | 0.030343 | 1.66933 | RHEB_cKO up vs WT | 0.739267 +3σ | 7 B4 7     | 27212    | 27212    | Snord35b  | small nucleolar RNA, C/D box 35B                                                |
| TC1300002f | 0.017952 | 1.66923 | RHEB_cKO up vs WT | 0.73918 +3σ  | 13 D1 13   | 68927    | 68927    | Ptcd2     | pentatricopeptide repeat domain 2                                               |
| TC15000022 | 0.052347 | 1.66889 | RHEB_cKO up vs WT | 0.738885 +3σ | 15 F2 15 5 | 110308   | 110308   | Krt5      | keratin 5                                                                       |
| TC1400001C | 0.094521 | 1.6688  | RHEB_cKO up vs WT | 0.738815 +3σ | 14 14      | 1E+08    | 1E+08    | Snora31   | small nucleolar RNA, H/ACA box 31                                               |
| TC0700000f | 0.001206 | 1.66884 | RHEB_cKO up vs WT | 0.738461 +3σ | ---        | ---      | ---      | Gm7336    | predicted gene 7336                                                             |
| TC0200002f | 0.02633  | 1.66836 | RHEB_cKO up vs WT | 0.73843 +3σ  | ---        | ---      | ---      | Gm14398   | predicted gene 14398                                                            |
| TC0100003f | 0.018502 | 1.66816 | RHEB_cKO up vs WT | 0.738256 +3σ | 1 H6 1     | 215193   | 215193   | Diexf     | digestive organ expansion factor homolog (zebrafish)                            |
| TC1700002f | 0.014105 | 1.6678  | RHEB_cKO up vs WT | 0.73795 +3σ  | 17 E3 17   | 12607    | 12607    | Cebpz     | CCAAT/enhancer binding protein zeta                                             |
| TC11000034 | 0.004434 | 1.6676  | RHEB_cKO up vs WT | 0.737775 +3σ | 11 C 11    | 70422    | 70422    | Ints2     | integrator complex subunit 2                                                    |
| TC02000022 | 0.006517 | 1.66697 | RHEB_cKO up vs WT | 0.737228 +3σ | 2 G3 2     | 14225    | 14225    | Fkbp1a    | FK506 binding protein 1a                                                        |
| TC03000002 | 0.018944 | 1.66653 | RHEB_cKO up vs WT | 0.736849 +3σ | 3 A3 3     | 56456    | 56456    | Actl6a    | actin-like 6A                                                                   |
| TC09000004 | 0.012993 | 1.66651 | RHEB_cKO up vs WT | 0.736826 +3σ | 9 A5.1 9 2 | 15481    | 15481    | Hspa8     | heat shock protein 8                                                            |
| TC1100001f | 0.005086 | 1.66649 | RHEB_cKO up vs WT | 0.736814 +3σ | ---        | ---      | ---      | Gm11557   | predicted gene 11557                                                            |
| TC0300001f | 0.016468 | 1.66578 | RHEB_cKO up vs WT | 0.736202 +3σ | 3 G3 3 63. | 67547    | 67547    | Slc39a8   | solute carrier family 39 (metal ion transporter), member 8                      |
| TC02000047 | 0.075024 | 1.66562 | RHEB_cKO up vs WT | 0.736059 +3σ | 2 F3 2 67. | 16449    | 16449    | Jag1      | jagged 1                                                                        |

|            |          |         |                   |              |              |        |        |           |                                                                               |
|------------|----------|---------|-------------------|--------------|--------------|--------|--------|-----------|-------------------------------------------------------------------------------|
| TC13000024 | 0.02399  | 1.66538 | RHEB_cKO up vs WT | 0.735847 +3σ | 13 D1 13     | 105372 | 105372 | Utp15     | UTP15 small subunit processome component                                      |
| TC16000012 | 0.013088 | 1.6643  | RHEB_cKO up vs WT | 0.734912 +3σ | 16 A3 16 1   | 94112  | 94112  | Med15     | mediator complex subunit 15                                                   |
| TC04000021 | 0.009556 | 1.66399 | RHEB_cKO up vs WT | 0.734645 +3σ | 4 E2 4       | 57741  | 57741  | Noc2l     | NOC2 like nucleolar associated transcriptional repressor                      |
| TC0200004C | 0.040721 | 1.66295 | RHEB_cKO up vs WT | 0.733746 +3σ | ---          | ---    | ---    | Gm13767   | predicted gene 13767                                                          |
| TC0800002C | 0.032691 | 1.66208 | RHEB_cKO up vs WT | 0.732992 +3σ | ---          | ---    | ---    | Gm10131   | predicted pseudogene 10131                                                    |
| TC09000022 | 0.005452 | 1.66175 | RHEB_cKO up vs WT | 0.7327 +3σ   | ---          | ---    | ---    | Gm7286    | predicted gene 7286                                                           |
| TC1500001E | 0.009551 | 1.66159 | RHEB_cKO up vs WT | 0.732564 +3σ | 15 D1 15     | 223601 | 223601 | Fam49b    | family with sequence similarity 49, member B                                  |
| TC1500000J | 0.001239 | 1.66102 | RHEB_cKO up vs WT | 0.732067 +3σ | ---          | ---    | ---    | Gm2606    | predicted pseudogene 2606                                                     |
| TC0800000I | 0.007246 | 1.66079 | RHEB_cKO up vs WT | 0.731866 +3σ | 8 A1.3 8     | 654452 | 654452 | Defa-ps12 | defensin, alpha, pseudogene 12                                                |
| TC0800003C | 0.003359 | 1.65997 | RHEB_cKO up vs WT | 0.731157 +3σ | 8 E1 8       | 68533  | 68533  | Mphosph6  | M phase phosphoprotein 6                                                      |
| TC01000027 | 0.030174 | 1.65986 | RHEB_cKO up vs WT | 0.73106 +3σ  | 1 1          | 1E+08  | 1E+08  | Snora75   | small nucleolar RNA, H/ACA box 75                                             |
| TC0200004E | 0.008596 | 1.65969 | RHEB_cKO up vs WT | 0.730911 +3σ | ---          | ---    | ---    | Gm14108   | predicted gene 14108                                                          |
| TC0X00002E | 0.006438 | 1.6596  | RHEB_cKO up vs WT | 0.730832 +3σ | ---          | ---    | ---    | Gm5944    | predicted gene 5944                                                           |
| TC0X000024 | 0.035284 | 1.65956 | RHEB_cKO up vs WT | 0.730804 +3σ | X C1 X 37.   | 15161  | 15161  | Hcfc1     | host cell factor C1                                                           |
| TC08000004 | 0.015034 | 1.6591  | RHEB_cKO up vs WT | 0.730402 +3σ | 8 A4 8 21.   | 52065  | 52065  | Mfhas1    | malignant fibrous histiocytoma amplified sequence 1                           |
| TC1500002I | 0.018522 | 1.65894 | RHEB_cKO up vs WT | 0.730258 +3σ | 15 F1 15 5   | 19082  | 19082  | Prkag1    | protein kinase, AMP-activated, gamma 1 non-catalytic subunit                  |
| TC13000027 | 0.014116 | 1.65877 | RHEB_cKO up vs WT | 0.73011 +3σ  | 13 C1 13 3   | 28114  | 28114  | Nsun2     | NOL1/NOP2/Sun domain family member 2                                          |
| TC0100000C | 0.002587 | 1.65876 | RHEB_cKO up vs WT | 0.730105 +3σ | ---          | ---    | ---    | Gm2383    | predicted gene 2383                                                           |
| TC01000014 | 0.051093 | 1.65867 | RHEB_cKO up vs WT | 0.730027 +3σ | 1 H2.1 1     | 14455  | 14455  | Gas5      | growth arrest specific 5                                                      |
| TC02000022 | 0.00557  | 1.65814 | RHEB_cKO up vs WT | 0.729568 +3σ | ---          | ---    | ---    | Gm14130   | predicted gene 14130                                                          |
| TC03000017 | 0.08134  | 1.65739 | RHEB_cKO up vs WT | 0.728913 +3σ | 3 3 B        | 13605  | 13605  | Ect2      | ect2 oncogene                                                                 |
| TC0X000007 | 0.068517 | 1.65734 | RHEB_cKO up vs WT | 0.728871 +3σ | ---          | ---    | ---    | Gm8503    | predicted gene 8503                                                           |
| TC17000023 | 0.002964 | 1.65726 | RHEB_cKO up vs WT | 0.728797 +3σ | ---          | ---    | ---    | Gm4518    | predicted gene 4518                                                           |
| TC1600002I | 0.019184 | 1.65671 | RHEB_cKO up vs WT | 0.728319 +3σ | 16 C4 16     | 72388  | 72388  | Ripk4     | receptor-interacting serine-threonine kinase 4                                |
| TC13000011 | 0.005206 | 1.65664 | RHEB_cKO up vs WT | 0.728261 +3σ | 13 D1 13     | 218506 | 218506 | Mrps27    | mitochondrial ribosomal protein S27                                           |
| TC07000024 | 0.004131 | 1.65663 | RHEB_cKO up vs WT | 0.728249 +3σ | 7 A3 7       | 22323  | 22323  | Vasp      | vasodilator-stimulated phosphoprotein                                         |
| TC09000014 | 0.055588 | 1.65641 | RHEB_cKO up vs WT | 0.728061 +3σ | 9 F2 9 59.1  | 12530  | 12530  | Cdc25a    | cell division cycle 25A                                                       |
| TC1300002F | 0.034417 | 1.65628 | RHEB_cKO up vs WT | 0.727943 +3σ | 13 D2.1 13 1 | 67263  | 67263  | Zswim6    | zinc finger SWIM-type containing 6                                            |
| TC09000023 | 0.005159 | 1.65553 | RHEB_cKO up vs WT | 0.727293 +3σ | 9 9 C        | 56434  | 56434  | Tspan3    | tetraspanin 3                                                                 |
| TC11000005 | 0.066022 | 1.65498 | RHEB_cKO up vs WT | 0.726814 +3σ | 11 B1.2 11   | 14584  | 14584  | Gfpt2     | glutamine fructose-6-phosphate transaminase 2                                 |
| TC10000015 | 0.001715 | 1.65435 | RHEB_cKO up vs WT | 0.726261 +3σ | ---          | ---    | ---    | Gm10327   | predicted pseudogene 10327                                                    |
| TC1100001C | 0.007219 | 1.65434 | RHEB_cKO up vs WT | 0.726254 +3σ | 11 B4 11     | 74148  | 74148  | Cluh      | clustered mitochondria (cluA/CLU1) homolog                                    |
| TC0200004E | 0.026384 | 1.65384 | RHEB_cKO up vs WT | 0.72582 +3σ  | 2 F1 2       | 215387 | 215387 | NcapH     | non-SMC condensin I complex, subunit H                                        |
| TC0900003I | 0.002165 | 1.6538  | RHEB_cKO up vs WT | 0.725788 +3σ | 9 F2 9       | 104831 | 104831 | Ptpn23    | protein tyrosine phosphatase, non-receptor type 23                            |
| TC15000005 | 0.008293 | 1.65272 | RHEB_cKO up vs WT | 0.724842 +3σ | ---          | ---    | ---    | Gm4335    | predicted gene 4335                                                           |
| TC1200001C | 0.021708 | 1.6522  | RHEB_cKO up vs WT | 0.724386 +3σ | 12 12 F1     | 18789  | 18789  | Papola    | poly (A) polymerase alpha                                                     |
| TC0700004E | 0.002807 | 1.65132 | RHEB_cKO up vs WT | 0.723618 +3σ | 7 A3 7       | 233033 | 233033 | Samd4b    | sterile alpha motif domain containing 4B                                      |
| TC09000002 | 0.058601 | 1.65128 | RHEB_cKO up vs WT | 0.723588 +3σ | 9 A4 9       | 78658  | 78658  | Ncapd3    | non-SMC condensin II complex, subunit D3                                      |
| TC0200002F | 0.026465 | 1.65087 | RHEB_cKO up vs WT | 0.72323 +3σ  | ---          | ---    | ---    | Gm13294   | predicted gene 13294                                                          |
| TC07000005 | 0.041889 | 1.65004 | RHEB_cKO up vs WT | 0.722498 +3σ | ---          | ---    | ---    | Gm7551    | predicted gene 7551                                                           |
| TC0300000E | 0.000177 | 1.64999 | RHEB_cKO up vs WT | 0.722456 +3σ | ---          | ---    | ---    | Gm4202    | predicted gene 4202                                                           |
| TC0700004E | 0.028814 | 1.64984 | RHEB_cKO up vs WT | 0.722233 +3σ | 7 F3 7 65.1  | 18817  | 18817  | Plk1      | polo-like kinase 1                                                            |
| TC11000022 | 0.005784 | 1.6496  | RHEB_cKO up vs WT | 0.722113 +3σ | ---          | ---    | ---    | Gm12017   | predicted gene 12017                                                          |
| TC1700000E | 0.016755 | 1.64933 | RHEB_cKO up vs WT | 0.72188 +3σ  | 17 B1 17     | 57390  | 57390  | Psors1c2  | psoriasis susceptibility 1 candidate 2 (human)                                |
| TC01000017 | 0.031875 | 1.64871 | RHEB_cKO up vs WT | 0.721339 +3σ | 1 1          | 108909 | 108909 | Aida      | axin interactor, dorsalization associated                                     |
| TC0900002E | 0.003598 | 1.64817 | RHEB_cKO up vs WT | 0.720866 +3σ | ---          | ---    | ---    | Gm3671    | predicted gene 3671                                                           |
| TC0100001E | 0.005502 | 1.64817 | RHEB_cKO up vs WT | 0.720865 +3σ | 1 1 H3       | 78825  | 78825  | Desi2     | desumoylating isopeptidase 2                                                  |
| TC1200002C | 0.003572 | 1.64765 | RHEB_cKO up vs WT | 0.720412 +3σ | 12 D1 12     | 67963  | 67963  | Npc2      | Niemann-Pick type C2                                                          |
| TC14000011 | 0.028049 | 1.64747 | RHEB_cKO up vs WT | 0.720251 +3σ | 14 D3 14     | 13709  | 13709  | Elf1      | E74-like factor 1                                                             |
| TC0X000017 | 0.035403 | 1.64737 | RHEB_cKO up vs WT | 0.720164 +3σ | X A2-A3.1    | 18824  | 18824  | Plp2      | proteolipid protein 2                                                         |
| TC02000003 | 0.081827 | 1.64678 | RHEB_cKO up vs WT | 0.719649 +3σ | ---          | ---    | ---    | Gm13378   | predicted gene 13378                                                          |
| TC0X000015 | 0.020281 | 1.64678 | RHEB_cKO up vs WT | 0.719644 +3σ | ---          | ---    | ---    | Amd-ps1   | S-adenosylmethionine decarboxylase, pseudogene 1                              |
| TC0400000E | 0.033073 | 1.64653 | RHEB_cKO up vs WT | 0.719425 +3σ | ---          | ---    | ---    | Gm12418   | predicted gene 12418                                                          |
| TC0300000E | 0.006415 | 1.64633 | RHEB_cKO up vs WT | 0.719253 +3σ | ---          | ---    | ---    | Gm10291   | predicted pseudogene 10291                                                    |
| TC06000017 | 0.013957 | 1.64611 | RHEB_cKO up vs WT | 0.719056 +3σ | 6 G3 6       | 71323  | 71323  | Rassf8    | Ras association (RalGDS/AF-6) domain family (N-terminal) member 8             |
| TC19000013 | 0.010915 | 1.64584 | RHEB_cKO up vs WT | 0.718823 +3σ | 19 19 C3     | 67979  | 67979  | Atad1     | ATPase family, AAA domain containing 1                                        |
| TC03000007 | 0.015006 | 1.64552 | RHEB_cKO up vs WT | 0.718544 +3σ | 3 F1 3       | 94232  | 94232  | Ubiquin4  | ubiquilin 4                                                                   |
| TC0200003E | 0.002356 | 1.64519 | RHEB_cKO up vs WT | 0.718254 +3σ | 2 2 C3       | 14425  | 14425  | Galnt3    | UDP-N-acetyl-alpha-D-galactosamine:polypeptide N-acetylgalactosaminyltran:    |
| TC0100003E | 0.003261 | 1.64393 | RHEB_cKO up vs WT | 0.717149 +3σ | 1 H6 1       | 226849 | 226849 | Ppp2r5a   | protein phosphatase 2, regulatory subunit B', alpha                           |
| TC17000013 | 0.002979 | 1.64367 | RHEB_cKO up vs WT | 0.716924 +3σ | 17 E4 17     | 56468  | 56468  | Socs5     | suppressor of cytokine signaling 5                                            |
| TC0300003I | 0.016152 | 1.64319 | RHEB_cKO up vs WT | 0.7165 +3σ   | 3 H3 3 78.   | 19352  | 19352  | Rabggtb   | Rab geranylgeranyl transferase, b subunit                                     |
| TC10000032 | 0.003443 | 1.64295 | RHEB_cKO up vs WT | 0.716291 +3σ | 10 C1 10     | 103466 | 103466 | Nt5dc3    | 5'-nucleotidase domain containing 3                                           |
| TC13000015 | 0.012354 | 1.64287 | RHEB_cKO up vs WT | 0.716221 +3σ | 13 A2-A3     | 319158 | 319158 | Hist1h4i  | histone cluster 1, H4i                                                        |
| TC0X00001E | 0.061436 | 1.6425  | RHEB_cKO up vs WT | 0.715892 +3σ | X A1.1 X     | 26896  | 26896  | Med14     | mediator complex subunit 14                                                   |
| TC02000052 | 0.023826 | 1.64249 | RHEB_cKO up vs WT | 0.715888 +3σ | 2 H3 2 89.   | 228913 | 228913 | Zfp217    | zinc finger protein 217                                                       |
| TC1100001C | 0.065739 | 1.64249 | RHEB_cKO up vs WT | 0.715886 +3σ | 11 B5 11 4   | 192159 | 192159 | Prpf8     | pre-mRNA processing factor 8                                                  |
| TC01000015 | 0.00297  | 1.64246 | RHEB_cKO up vs WT | 0.715856 +3σ | ---          | ---    | ---    | Gm10566   | predicted gene 10566                                                          |
| TC0800000C | 0.048888 | 1.64161 | RHEB_cKO up vs WT | 0.715112 +3σ | ---          | ---    | ---    | Gm16589   | predicted gene 16589                                                          |
| TC16000012 | 0.001085 | 1.64103 | RHEB_cKO up vs WT | 0.714598 +3σ | 16 A1 16 6   | 14852  | 14852  | Gspt1     | G1 to S phase transition 1                                                    |
| TC1100003E | 0.018528 | 1.6408  | RHEB_cKO up vs WT | 0.714396 +3σ | 11 D 11      | 217109 | 217109 | Utp18     | UTP18 small subunit processome component                                      |
| TC0900003I | 0.043411 | 1.64043 | RHEB_cKO up vs WT | 0.714072 +3σ | 9 F3 9       | 68292  | 68292  | Stt3b     | STT3, subunit of the oligosaccharyltransferase complex, homolog B (S. cerevis |
| TC06000013 | 0.013362 | 1.6401  | RHEB_cKO up vs WT | 0.713788 +3σ | 6 F1 6 57.1  | 17113  | 17113  | M6pr      | mannose-6-phosphate receptor, cation dependent                                |
| TC08000024 | 0.002299 | 1.6399  | RHEB_cKO up vs WT | 0.713609 +3σ | ---          | ---    | ---    | Gm10358   | predicted gene 10358                                                          |
| TC06000034 | 0.014579 | 1.63986 | RHEB_cKO up vs WT | 0.713576 +3σ | 6 G3 6       | 71177  | 71177  | Asun      | asunder, spermatogenesis regulator                                            |
| TC0400001E | 0.010416 | 1.63986 | RHEB_cKO up vs WT | 0.713574 +3σ | ---          | ---    | ---    | Gm13169   | predicted gene 13169                                                          |
| TC17000005 | 0.041795 | 1.63922 | RHEB_cKO up vs WT | 0.713013 +3σ | ---          | ---    | ---    | Trp53-ps  | transformation related protein 53, pseudogene                                 |
| TC0200005E | 0.012834 | 1.63875 | RHEB_cKO up vs WT | 0.712595 +3σ | 2 2 H2       | 75710  | 75710  | Rbm12     | RNA binding motif protein 12                                                  |
| TC19000003 | 0.009866 | 1.63856 | RHEB_cKO up vs WT | 0.712428 +3σ | 10 10 C1     | 66118  | 66118  | Sarnp     | SAP domain containing ribonucleoprotein                                       |
| TC01000024 | 0.018891 | 1.63847 | RHEB_cKO up vs WT | 0.712348 +3σ | 1 1 C1-C2    | 57750  | 57750  | Wdr12     | WD repeat domain 12                                                           |
| TC0700003E | 0.088167 | 1.63834 | RHEB_cKO up vs WT | 0.712234 +3σ | 7 D3 7 48.   | 80982  | 80982  | Cemp      | cell migration inducing protein, hyaluronan binding                           |
| TC1100000E | 0.125545 | 1.63822 | RHEB_cKO up vs WT | 0.712129 +3σ | 11 11        | 1E+08  | 1E+08  | Snord118  | small nucleolar RNA, C/D box 118                                              |
| TC0900000C | 0.010975 | 1.63811 | RHEB_cKO up vs WT | 0.712035 +3σ | ---          | ---    | ---    | Gm10720   | predicted gene 10720                                                          |
| TC0M000000 | 0.015957 | 1.63766 | RHEB_cKO up vs WT | 0.711636 +3σ | ---          | ---    | ---    | mt-Tq     | mitochondrially encoded tRNA glutamine                                        |
| TC0300001C | 0.000808 | 1.63762 | RHEB_cKO up vs WT | 0.711602 +3σ | 3 F2.2 3     | 229672 | 229672 | Bcl2l15   | BCL2-like 15                                                                  |
| TC18000007 | 0.012042 | 1.63719 | RHEB_cKO up vs WT | 0.711222 +3σ | 18 E2 18 4   | 17191  | 17191  | Mbd2      | methyl-CpG binding domain protein 2                                           |
| TC13000005 | 0.019717 | 1.63713 | RHEB_cKO up vs WT | 0.711117 +3σ | 13 A5 13     | 105148 | 105148 | Iars      | isoleucine-tRNA synthetase                                                    |
| TC1100002E | 0.002466 | 1.63686 | RHEB_cKO up vs WT | 0.710933 +3σ | 11 B 11 37   | 14248  | 14248  | Flii      | flightless I actin binding protein                                            |
| TC12000013 | 0.021107 | 1.63675 | RHEB_cKO up vs WT | 0.710833 +3σ | 12 A1.1 12   | 1E+08  | 1E+08  | Gm3625    | predicted gene 3625                                                           |
| TC08000024 | 0.007199 | 1.63601 | RHEB_cKO up vs WT | 0.710177 +3σ | 8 C1 8 35.   | 16795  | 16795  | Large     | like-glycosyltransferase                                                      |

|            |          |         |                   |              |             |          |          |           |                                                                            |
|------------|----------|---------|-------------------|--------------|-------------|----------|----------|-----------|----------------------------------------------------------------------------|
| TC06000034 | 0.008008 | 1.63594 | RHEB_cKO up vs WT | 0.710124 +3σ | 6 G2 6 77.  | 16653    | 16653    | Kras      | Kirsten rat sarcoma viral oncogene homolog                                 |
| TC02000046 | 0.062938 | 1.63558 | RHEB_cKO up vs WT | 0.709801 +3σ | 2 F 2 62.9' | 16176    | 16176    | Il1b      | interleukin 1 beta                                                         |
| TC07000012 | 0.072712 | 1.6353  | RHEB_cKO up vs WT | 0.709552 +3σ | 7 7 D3-E1.  | 13032    | 13032    | Ctsc      | cathepsin C                                                                |
| TC08000032 | 0.005921 | 1.6349  | RHEB_cKO up vs WT | 0.709201 +3σ | 8 E1 8      | 22224    | 22224    | Usp10     | ubiquitin specific peptidase 10                                            |
| TC19000011 | 0.015116 | 1.63482 | RHEB_cKO up vs WT | 0.709134 +3σ | 19 B 19 7.  | 108673   | 108673   | Ccdc86    | coiled-coil domain containing 86                                           |
| TC02000026 | 0.009434 | 1.6348  | RHEB_cKO up vs WT | 0.709111 +3σ | 2 H4 2 97.  | 19334    | 19334    | Rab22a    | RAB22A, member RAS oncogene family                                         |
| TC11000004 | 0.02247  | 1.63478 | RHEB_cKO up vs WT | 0.709092 +3σ | 11 B1.2 11  | 14694    | 14694    | Rack1     | receptor for activated C kinase 1                                          |
| TC12000014 | 0.003797 | 1.63451 | RHEB_cKO up vs WT | 0.708862 +3σ | 12 A1.3 12  | 434693   | 434693   | Mrto4-ps2 | mRNA turnover 4, pseudogene 2                                              |
| TC03000000 | 0.008462 | 1.63436 | RHEB_cKO up vs WT | 0.708722 +3σ | 3 A1-A3 3   | 16592    | 16592    | Fabp5     | fatty acid binding protein 5, epidermal                                    |
| TC09000021 | 0.045406 | 1.63413 | RHEB_cKO up vs WT | 0.70852 +3σ  | 9 A5.2 9 2  | 12402    | 12402    | Cbl       | Casitas B-lineage lymphoma                                                 |
| TC16000003 | 0.08468  | 1.63397 | RHEB_cKO up vs WT | 0.708384 +3σ | 16 B1 16 1  | 22061    | 22061    | Trp63     | transformation related protein 63                                          |
| TC08000027 | 0.00306  | 1.63378 | RHEB_cKO up vs WT | 0.708213 +3σ | 8 D1 8 47.  | 14719    | 14719    | Got2      | glutamic-oxaloacetic transaminase 2, mitochondrial                         |
| TC02000045 | 0.018019 | 1.63369 | RHEB_cKO up vs WT | 0.708133 +3σ | 2 F1 2 61.  | 73338    | 73338    | Itpril1   | inositol 1,4,5-triphosphate receptor interacting protein-like 1            |
| TC12000008 | 0.023045 | 1.63309 | RHEB_cKO up vs WT | 0.707608 +3σ | ---         | ---      | ---      | Gm2075    | predicted gene 2075                                                        |
| TC03000015 | 0.079325 | 1.63265 | RHEB_cKO up vs WT | 0.707211 +3σ | 3 H3 3 77.  | 51886    | 51886    | Fubp1     | far upstream element (FUSE) binding protein 1                              |
| TC02000022 | 0.003978 | 1.63247 | RHEB_cKO up vs WT | 0.707056 +3σ | ---         | ---      | ---      | Gm14148   | predicted gene 14148                                                       |
| TC13000015 | 0.016656 | 1.6323  | RHEB_cKO up vs WT | 0.706905 +3σ | 13 A5 13    | 218210   | 218210   | Nup153    | nucleoporin 153                                                            |
| TC15000021 | 0.019561 | 1.63209 | RHEB_cKO up vs WT | 0.706719 +3σ | 15 15 F2    | 69612    | 69612    | Kansl2    | KAT8 regulatory NSL complex subunit 2                                      |
| TC05000015 | 0.00173  | 1.63169 | RHEB_cKO up vs WT | 0.706366 +3σ | ---         | ---      | ---      | Gm10481   | predicted gene 10481                                                       |
| TC12000014 | 0.002651 | 1.63147 | RHEB_cKO up vs WT | 0.706177 +3σ | ---         | ---      | ---      | Gm4929    | predicted gene 4929                                                        |
| TC13000015 | 0.009334 | 1.63126 | RHEB_cKO up vs WT | 0.705989 +3σ | 13 A2-A3 3  | 319167   | 319167   | Hist1h2ag | histone cluster 1, H2ag                                                    |
| TC0X000023 | 0.058643 | 1.6308  | RHEB_cKO up vs WT | 0.705583 +3σ | X A6 X      | 671878   | 671878   | Gm14680   | predicted gene 14680                                                       |
| TC06000025 | 0.003147 | 1.63058 | RHEB_cKO up vs WT | 0.705386 +3σ | 6 6 F       | 58186    | 58186    | Rad18     | RAD18 E3 ubiquitin protein ligase                                          |
| TC12000010 | 0.061734 | 1.63052 | RHEB_cKO up vs WT | 0.705336 +3σ | ---         | ---      | ---      | Gm17052   | predicted gene 17052                                                       |
| TC12000000 | 0.002248 | 1.63046 | RHEB_cKO up vs WT | 0.70528 +3σ  | 12 A1.1 12  | 626534   | 626534   | Gm6682    | tubulin, alpha 1C pseudogene                                               |
| TC17000011 | 0.026136 | 1.6304  | RHEB_cKO up vs WT | 0.705225 +3σ | 17 E3 17    | 12211    | 12211    | Birc6     | baculoviral IAP repeat-containing 6                                        |
| TC0X000025 | 0.008164 | 1.63014 | RHEB_cKO up vs WT | 0.704995 +3σ | ---         | ---      | ---      | Gm8822    | predicted gene 8822                                                        |
| TC04000016 | 0.076149 | 1.63006 | RHEB_cKO up vs WT | 0.704923 +3σ | 4 D2.3 4    | 100342   | 100342   | Fam46b    | family with sequence similarity 46, member B                               |
| TC10000007 | 0.001937 | 1.62998 | RHEB_cKO up vs WT | 0.704855 +3σ | 10 C1 10 3  | 20509    | 20509    | Slc19a1   | solute carrier family 19 (folate transporter), member 1                    |
| TC01000018 | 0.001037 | 1.62904 | RHEB_cKO up vs WT | 0.704021 +3σ | 1 H6 1      | 226856   | 226856   | Lpgat1    | lysophosphatidylglycerol acyltransferase 1                                 |
| TC0X000008 | 0.002142 | 1.62852 | RHEB_cKO up vs WT | 0.703564 +3σ | ---         | ---      | ---      | Gm14777   | predicted gene 14777                                                       |
| TC02000041 | 0.003349 | 1.62837 | RHEB_cKO up vs WT | 0.703429 +3σ | ---         | ---      | ---      | Gm13810   | predicted gene 13810                                                       |
| TC17000002 | 0.010883 | 1.62835 | RHEB_cKO up vs WT | 0.703409 +3σ | 17 17       | 387248   | 387248   | Mirlet7e  | microRNA let7e                                                             |
| TC13000015 | 0.010193 | 1.62827 | RHEB_cKO up vs WT | 0.703338 +3σ | ---         | ---      | ---      | Gm7251    | predicted pseudogene 7251                                                  |
| TC03000027 | 0.136671 | 1.62825 | RHEB_cKO up vs WT | 0.703324 +3σ | 3 F2.3 3    | 229700   | 229700   | Rbm15     | RNA binding motif protein 15                                               |
| TC08000031 | 0.000903 | 1.62806 | RHEB_cKO up vs WT | 0.703156 +3σ | 8 E2 8      | 244668   | 244668   | Sipa1l2   | signal-induced proliferation-associated 1 like 2                           |
| TC11000041 | 0.063128 | 1.62789 | RHEB_cKO up vs WT | 0.703007 +3σ | 11 E2 11 8  | 20382    | 20382    | Srsf2     | serine/arginine-rich splicing factor 2                                     |
| TC03000005 | 0.005966 | 1.62783 | RHEB_cKO up vs WT | 0.702953 +3σ | ---         | ---      | ---      | Gm5139    | predicted gene 5139                                                        |
| TC0X000021 | 0.048868 | 1.62781 | RHEB_cKO up vs WT | 0.702931 +3σ | ---         | ---      | ---      | Gm7803    | predicted gene 7803                                                        |
| TC0X000018 | 0.00223  | 1.62772 | RHEB_cKO up vs WT | 0.702856 +3σ | ---         | ---      | ---      | Gm7129    | predicted gene 7129                                                        |
| TC15000014 | 0.000109 | 1.62746 | RHEB_cKO up vs WT | 0.702623 +3σ | 15 B3.1 15  | 21847    | 21847    | Klf10     | Kruppel-like factor 10                                                     |
| TC07000035 | 0.016198 | 1.62735 | RHEB_cKO up vs WT | 0.702526 +3σ | ---         | ---      | ---      | Gm16464   | predicted gene 16464                                                       |
| TC17000001 | 0.003946 | 1.62624 | RHEB_cKO up vs WT | 0.70154 +3σ  | ---         | ---      | ---      | Gm3222    | predicted pseudogene 3222                                                  |
| TC01000011 | 0.049415 | 1.62545 | RHEB_cKO up vs WT | 0.700843 +3σ | 1 E4 1      | 226412   | 226412   | R3hdm1    | R3H domain containing 1                                                    |
| TC19000012 | 0.00416  | 1.62498 | RHEB_cKO up vs WT | 0.700418 +3σ | ---         | ---      | ---      | Gm8825    | predicted gene 8825                                                        |
| TC14000020 | 0.030022 | 1.62468 | RHEB_cKO up vs WT | 0.700158 +3σ | 14 C2 14 2  | 114741   | 114741   | Supt16    | suppressor of Ty 16                                                        |
| TC08000005 | 0.065868 | 1.62449 | RHEB_cKO up vs WT | 0.699985 +3σ | 8 C3 8      | 330814   | 330814   | Adgrl1    | adhesion G protein-coupled receptor L1                                     |
| TC03000005 | 0.020137 | 1.6243  | RHEB_cKO up vs WT | 0.699816 +3σ | ---         | ---      | ---      | Gm20657   | predicted gene 20657                                                       |
| TC04000025 | 0.013464 | 1.62315 | RHEB_cKO up vs WT | 0.6988 +3σ   | ---         | ---      | ---      | Gm12444   | predicted gene 12444                                                       |
| TC08000012 | 0.03292  | 1.62297 | RHEB_cKO up vs WT | 0.698638 +3σ | 8 8 D2      | 66164    | 66164    | Nip7      | NIP7, nucleolar pre-rRNA processing protein                                |
| TC02000045 | 0.00019  | 1.62286 | RHEB_cKO up vs WT | 0.698538 +3σ | 2 H1 2      | 16418    | 16418    | Eif6      | eukaryotic translation initiation factor 6                                 |
| TC04000034 | 0.002235 | 1.62217 | RHEB_cKO up vs WT | 0.697928 +3σ | 4 4 D1      | 12331    | 12331    | Cap1      | CAP, adenylate cyclase-associated protein 1 (yeast)                        |
| TC12000001 | 0.024147 | 1.62212 | RHEB_cKO up vs WT | 0.697788 +3σ | ---         | ---      | ---      | Gm22748   | predicted gene, 22748                                                      |
| TC01000002 | 0.008007 | 1.62194 | RHEB_cKO up vs WT | 0.697718 +3σ | 1 B 1       | 26921    | 26921    | Map4k4    | mitogen-activated protein kinase kinase kinase kinase 4                    |
| TC11000005 | 0.003295 | 1.62113 | RHEB_cKO up vs WT | 0.696999 +3σ | 11 B1.3 11  | 19052    | 19052    | Ppp2ca    | protein phosphatase 2 (formerly 2A), catalytic subunit, alpha isoform      |
| TC18000014 | 0.002324 | 1.62059 | RHEB_cKO up vs WT | 0.696516 +3σ | 18 E1 18 3  | 11555    | 11555    | Adrb2     | adrenergic receptor, beta 2                                                |
| TC04000025 | 0.035545 | 1.62047 | RHEB_cKO up vs WT | 0.696417 +3σ | 4 C3 4      | 101739   | 101739   | Psip1     | PC4 and SFRS1 interacting protein 1                                        |
| TC05000016 | 0.00458  | 1.62045 | RHEB_cKO up vs WT | 0.696396 +3σ | 5 G2 5      | 433956   | 433956   | Dnaaf5    | dynein, axonemal assembly factor 5                                         |
| TC01000025 | 0.005842 | 1.62042 | RHEB_cKO up vs WT | 0.696365 +3σ | 1 1 E2      | 64143    | 64143    | Ralb      | v-ral simian leukemia viral oncogene B                                     |
| TC12000012 | 0.163429 | 1.61902 | RHEB_cKO up vs WT | 0.695117 +3σ | 12 12       | 387199   | 387199   | Mir203    | microRNA 203                                                               |
| TC03000020 | 0.005778 | 1.61898 | RHEB_cKO up vs WT | 0.695085 +3σ | ---         | ---      | ---      | Gm8177    | predicted gene 8177                                                        |
| TC01000022 | 0.046562 | 1.61887 | RHEB_cKO up vs WT | 0.694989 +3σ | 1 C1.1 1    | 227059   | 227059   | Slc39a10  | solute carrier family 39 (zinc transporter), member 10                     |
| TC14000005 | 0.071357 | 1.61843 | RHEB_cKO up vs WT | 0.694599 +3σ | 14 D1 14 4  | 210925   | 210925   | Ints9     | integrator complex subunit 9                                               |
| TC10000016 | 0.015494 | 1.6183  | RHEB_cKO up vs WT | 0.694476 +3σ | 10 10 C1    | 66118    | 66118    | Sarnp     | SAP domain containing ribonucleoprotein                                    |
| TC01000038 | 0.004502 | 1.61822 | RHEB_cKO up vs WT | 0.694403 +3σ | 1 C1 1      | 75623    | 75623    | Tex30     | testis expressed 30                                                        |
| TC04000027 | 0.001555 | 1.61817 | RHEB_cKO up vs WT | 0.694363 +3σ | ---         | ---      | ---      | Gm12537   | predicted gene 12537                                                       |
| TC07000003 | 0.015054 | 1.61808 | RHEB_cKO up vs WT | 0.694281 +3σ | 7 7 9.95 cl | 1.01E+08 | 1.01E+08 | Gm19345   | predicted gene, 19345                                                      |
| TC17000016 | 0.019198 | 1.61785 | RHEB_cKO up vs WT | 0.69408 +3σ  | ---         | ---      | ---      | Gm5430    | predicted gene 5430                                                        |
| TC10000004 | 0.01779  | 1.61692 | RHEB_cKO up vs WT | 0.693246 +3σ | 10 B3 10 2  | 52014    | 52014    | Nus1      | NUS1 dehydrodolichyl diphosphate synthase subunit                          |
| TC09000005 | 0.073393 | 1.61685 | RHEB_cKO up vs WT | 0.693189 +3σ | 9 A5.2 9 2  | 15270    | 15270    | H2afx     | H2A histone family, member X                                               |
| TC0X000015 | 0.01576  | 1.61677 | RHEB_cKO up vs WT | 0.693113 +3σ | ---         | ---      | ---      | Gm15191   | predicted gene 15191                                                       |
| TC19000006 | 0.009972 | 1.61658 | RHEB_cKO up vs WT | 0.692942 +3σ | 19 C3 19    | 226169   | 226169   | Ppcc1     | peroxisome proliferative activated receptor, gamma, coactivator-related 1  |
| TC08000006 | 0.001724 | 1.61623 | RHEB_cKO up vs WT | 0.692629 +3σ | ---         | ---      | ---      | Gm10284   | predicted pseudogene 10284                                                 |
| TC10000012 | 0.029776 | 1.61552 | RHEB_cKO up vs WT | 0.691996 +3σ | 10 D1 10 5  | 53605    | 53605    | Nap1l1    | nucleosome assembly protein 1-like 1                                       |
| TC07000001 | 0.025871 | 1.6147  | RHEB_cKO up vs WT | 0.691267 +3σ | 7 7 A2      | 21849    | 21849    | Trim28    | tripartite motif-containing 28                                             |
| TC0X000004 | 0.00204  | 1.61432 | RHEB_cKO up vs WT | 0.690923 +3σ | X A6 X 29.  | 15452    | 15452    | Hprt      | hypoxanthine guanine phosphoribosyl transferase                            |
| TC02000012 | 0.027501 | 1.61417 | RHEB_cKO up vs WT | 0.690793 +3σ | ---         | ---      | ---      | Gm13691   | predicted gene 13691                                                       |
| TC02000032 | 0.019894 | 1.61405 | RHEB_cKO up vs WT | 0.690687 +3σ | 2 B 2       | 72500    | 72500    | Ier5l     | immediate early response 5-like                                            |
| TC06000008 | 0.00589  | 1.61393 | RHEB_cKO up vs WT | 0.690575 +3σ | 6 6 C3      | 12332    | 12332    | Capg      | capping protein (actin filament), gelsolin-like                            |
| TC11000035 | 0.003278 | 1.61379 | RHEB_cKO up vs WT | 0.690451 +3σ | 11 E1 11 6  | 56095    | 56095    | Ftsj3     | FtsJ RNA methyltransferase homolog 3 (E. coli)                             |
| TC03000005 | 0.005687 | 1.61374 | RHEB_cKO up vs WT | 0.69041 +3σ  | 3 E1 3      | 97112    | 97112    | Nmd3      | NMD3 ribosome export adaptor                                               |
| TC13000001 | 0.036374 | 1.61373 | RHEB_cKO up vs WT | 0.690395 +3σ | 13 A2-A3 3  | 319187   | 319187   | Hist1h2bn | histone cluster 1, H2bn                                                    |
| TC14000022 | 0.006494 | 1.61351 | RHEB_cKO up vs WT | 0.690204 +3σ | 14 14 C3    | 18130    | 18130    | Ints6     | integrator complex subunit 6                                               |
| TC02000044 | 0.025167 | 1.61292 | RHEB_cKO up vs WT | 0.689679 +3σ | 2 F1 2 60.  | 20402    | 20402    | Zfp106    | zinc finger protein 106                                                    |
| TC0X000025 | 0.001583 | 1.61241 | RHEB_cKO up vs WT | 0.689214 +3σ | ---         | ---      | ---      | Gm14760   | predicted gene 14760                                                       |
| TC04000003 | 0.417074 | 1.61234 | RHEB_cKO up vs WT | 0.689155 +3σ | ---         | ---      | ---      | Gm13302   | predicted gene 13302                                                       |
| TC09000001 | 0.018448 | 1.61234 | RHEB_cKO up vs WT | 0.689153 +3σ | ---         | ---      | ---      | Gm24357   | predicted gene, 24357                                                      |
| TC05000003 | 0.018092 | 1.61186 | RHEB_cKO up vs WT | 0.688728 +3σ | 5 B1 5      | 69719    | 69719    | Cad       | carbamoyl-phosphate synthetase 2, aspartate transcarbamylase, and dihydroc |
| TC15000010 | 0.000814 | 1.61119 | RHEB_cKO up vs WT | 0.688124 +3σ | 15 F1 15    | 22146    | 22146    | Tuba1c    | tubulin, alpha 1C                                                          |

|            |          |          |                     |              |             |        |        |           |                                                                                    |
|------------|----------|----------|---------------------|--------------|-------------|--------|--------|-----------|------------------------------------------------------------------------------------|
| TC05000002 | 0.037592 | 1.61116  | RHEB_cKO up vs WT   | 0.688101 +3σ | 5 B1 5 15.  | 433864 | 433864 | Nom1      | nucleolar protein with MIF4G domain 1                                              |
| TC0X000027 | 0.07448  | 1.61099  | RHEB_cKO up vs WT   | 0.687951 +3σ | ---         | ---    | ---    | Gm9103    | predicted gene 9103                                                                |
| TC15000014 | 0.009041 | 1.61044  | RHEB_cKO up vs WT   | 0.687453 +3σ | 15 15 C     | 54375  | 54375  | Azin1     | antizyme inhibitor 1                                                               |
| TC04000027 | 0.063884 | 1.61031  | RHEB_cKO up vs WT   | 0.687336 +3σ | 4 4 C1      | 54366  | 54366  | Ctnnal1   | catenin (cadherin associated protein), alpha-like 1                                |
| TC05000025 | 0.014148 | 1.61015  | RHEB_cKO up vs WT   | 0.687193 +3σ | ---         | ---    | ---    | Rps19-ps8 | ribosomal protein S19, pseudogene 8                                                |
| TC02000040 | 0.065388 | 1.60988  | RHEB_cKO up vs WT   | 0.686954 +3σ | 2 E1-2 2 5  | 19271  | 19271  | Ptprj     | protein tyrosine phosphatase, receptor type, J                                     |
| TC03000012 | 0.041557 | 1.60973  | RHEB_cKO up vs WT   | 0.686822 +3σ | 3 3 G3      | 29815  | 29815  | Bcar3     | breast cancer anti-estrogen resistance 3                                           |
| TC04000020 | 0.017961 | 1.60963  | RHEB_cKO up vs WT   | 0.686725 +3σ | 4 B1 4      | 269536 | 269536 | Tex10     | testis expressed gene 10                                                           |
| TC13000018 | 0.001334 | 1.60946  | RHEB_cKO up vs WT   | 0.686577 +3σ | 13 A3.3 1:  | 105245 | 105245 | Txndc5    | thioredoxin domain containing 5                                                    |
| TC07000020 | 0.001187 | 1.60938  | RHEB_cKO up vs WT   | 0.686504 +3σ | 7 A3 7      | 233011 | 233011 | Itpkc     | inositol 1,4,5-trisphosphate 3-kinase C                                            |
| TC16000001 | 0.012364 | 1.60905  | RHEB_cKO up vs WT   | 0.686206 +3σ | 16 A1 16    | 67203  | 67203  | Nde1      | nudE neurodevelopment protein 1                                                    |
| TC14000011 | 0.123518 | 1.60888  | RHEB_cKO up vs WT   | 0.686058 +3σ | 14 E2.2 14  | 12224  | 12224  | Klf5      | Kruppel-like factor 5                                                              |
| TC17000010 | 0.002306 | 1.60869  | RHEB_cKO up vs WT   | 0.685884 +3σ | 17 A3.3 1:  | 213773 | 213773 | Tbl3      | transducin (beta)-like 3                                                           |
| TC16000010 | 0.002224 | 1.60838  | RHEB_cKO up vs WT   | 0.685609 +3σ | 16 C4 16    | 338467 | 338467 | Morc3     | microorchidia 3                                                                    |
| TC02000045 | 0.010902 | 1.60794  | RHEB_cKO up vs WT   | 0.685209 +3σ | 2 H1 2 76.  | 269378 | 269378 | Ahcy      | S-adenosylhomocysteine hydrolase                                                   |
| TC05000025 | 0.000981 | 1.60757  | RHEB_cKO up vs WT   | 0.684877 +3σ | ---         | ---    | ---    | Gm10359   | predicted gene 10359                                                               |
| TC08000020 | 0.003533 | 1.60745  | RHEB_cKO up vs WT   | 0.684772 +3σ | ---         | ---    | ---    | Gm5787    | predicted gene 5787                                                                |
| TC13000017 | 0.007995 | 1.60737  | RHEB_cKO up vs WT   | 0.684704 +3σ | 13 13 A3.:  | 13557  | 13557  | E2f3      | E2F transcription factor 3                                                         |
| TC13000025 | 0.00022  | 1.60732  | RHEB_cKO up vs WT   | 0.68466 +3σ  | 13 D1 13    | 621312 | 621312 | Gm6211    | predicted gene 6211                                                                |
| TC01000018 | 0.013234 | 1.60716  | RHEB_cKO up vs WT   | 0.684513 +3σ | ---         | ---    | ---    | Gm3809    | predicted gene 3809                                                                |
| TC07000001 | 0.063114 | 1.60692  | RHEB_cKO up vs WT   | 0.684296 +3σ | ---         | ---    | ---    | Gm24412   | predicted gene, 24412                                                              |
| TC05000022 | 0.012244 | 1.60677  | RHEB_cKO up vs WT   | 0.684166 +3σ | 5 B2 5      | 24116  | 24116  | Nelfa     | negative elongation factor complex member A, Whsc2                                 |
| TC11000013 | 0.075717 | 1.60668  | RHEB_cKO up vs WT   | 0.684078 +3σ | 11 C 11 5:  | 110809 | 110809 | Srsf1     | serine/arginine-rich splicing factor 1                                             |
| TC11000010 | 0.094468 | 1.60634  | RHEB_cKO up vs WT   | 0.683779 +3σ | ---         | ---    | ---    | Gm11585   | predicted gene 11585                                                               |
| TC08000021 | 0.000757 | 1.60622  | RHEB_cKO up vs WT   | 0.683666 +3σ | ---         | ---    | ---    | Gm2193    | predicted gene 2193                                                                |
| TC0M000000 | 0.230049 | 1.60593  | RHEB_cKO up vs WT   | 0.683407 +3σ | ---         | ---    | ---    | mt-Tn     | mitochondrially encoded tRNA asparagine                                            |
| TC07000010 | 0.012979 | 1.60573  | RHEB_cKO up vs WT   | 0.683233 +3σ | 7 F1 7      | 53322  | 53322  | Nucb2     | nucleobindin 2                                                                     |
| TC16000003 | 0.003244 | 1.60562  | RHEB_cKO up vs WT   | 0.68313 +3σ  | ---         | ---    | ---    | Gm5809    | predicted pseudogene 5809                                                          |
| TC06000024 | 0.04466  | 1.60537  | RHEB_cKO up vs WT   | 0.682906 +3σ | 6 C1 6      | 69956  | 69956  | Ptcd3     | pentatricopeptide repeat domain 3                                                  |
| TC11000020 | 0.00952  | 1.60525  | RHEB_cKO up vs WT   | 0.682799 +3σ | ---         | ---    | ---    | Gm12182   | predicted gene 12182                                                               |
| TC19000012 | 0.034409 | 1.60488  | RHEB_cKO up vs WT   | 0.682461 +3σ | 19 A 19 10  | 107272 | 107272 | Psat1     | phosphoserine aminotransferase 1                                                   |
| TC03000010 | 0.004344 | 1.60465  | RHEB_cKO up vs WT   | 0.682258 +3σ | 3 F2.2 3    | 329727 | 329727 | Dennd2c   | DENN/MADD domain containing 2C                                                     |
| TC15000017 | 0.01167  | 1.60425  | RHEB_cKO up vs WT   | 0.681903 +3σ | 15 D3 15    | 105732 | 105732 | Fam83h    | family with sequence similarity 83, member H                                       |
| TC09000008 | 0.094725 | 1.60419  | RHEB_cKO up vs WT   | 0.681846 +3σ | ---         | ---    | ---    | Gm23344   | predicted gene, 23344                                                              |
| TC16000001 | 0.009689 | 1.60408  | RHEB_cKO up vs WT   | 0.681746 +3σ | 16 A2 16    | 70120  | 70120  | Yars2     | tyrosyl-tRNA synthetase 2 (mitochondrial)                                          |
| TC02000022 | 0.004327 | 1.60404  | RHEB_cKO up vs WT   | 0.681707 +3σ | ---         | ---    | ---    | Gm14240   | predicted gene 14240                                                               |
| TC04000032 | 0.009872 | 1.60399  | RHEB_cKO up vs WT   | 0.681667 +3σ | ---         | ---    | ---    | Gm12749   | predicted gene 12749                                                               |
| TC10000024 | 0.011823 | 1.60328  | RHEB_cKO up vs WT   | 0.68103 +3σ  | 10 C1 10 :  | 110816 | 110816 | Pwp2      | PWP2 periodic tryptophan protein homolog (yeast)                                   |
| TSUnmappe  | 0.239832 | 1.60327  | RHEB_cKO up vs WT   | 0.681022 +3σ | 10 B1 10    | 19850  | 19850  | Rnu3a     | U3A small nuclear RNA                                                              |
| TC12000024 | 0.000414 | 1.60312  | RHEB_cKO up vs WT   | 0.680887 +3σ | 12 F1 12 :  | 217866 | 217866 | Cdc42bbp  | CDC42 binding protein kinase beta                                                  |
| TC01000020 | 0.050759 | 1.60286  | RHEB_cKO up vs WT   | 0.680651 +3σ | 1 1 A3-A5   | 17215  | 17215  | Mcm3      | minichromosome maintenance complex component 3                                     |
| TC11000003 | 0.013818 | 1.60268  | RHEB_cKO up vs WT   | 0.68049 +3σ  | 11 D 11 6:  | 20848  | 20848  | Stat3     | signal transducer and activator of transcription 3                                 |
| TC16000010 | 0.021047 | 1.60248  | RHEB_cKO up vs WT   | 0.680306 +3σ | 16 B4 16    | 106248 | 106248 | Qtrtd1    | queuine tRNA-ribosyltransferase domain containing 1                                |
| TC03000011 | 0.00312  | 1.60219  | RHEB_cKO up vs WT   | 0.680048 +3σ | 3 F3 3      | 26442  | 26442  | PsmA5     | proteasome (prosome, macropain) subunit, alpha type 5                              |
| TC03000027 | 0.117268 | 1.60202  | RHEB_cKO up vs WT   | 0.679891 +3σ | 3 F3 3      | 76123  | 76123  | Gpsm2     | G-protein signalling modulator 2 (AGS3-like, C. elegans)                           |
| TC19000007 | 0.04836  | 1.60138  | RHEB_cKO up vs WT   | 0.679316 +3σ | 19 D2 19    | 13006  | 13006  | Smc3      | structural maintenance of chromosomes 3                                            |
| TC14000024 | 0.073549 | -1.61384 | RHEB_cKO down vs WT | -0.6905 -3σ  | 14 D3 14    | 380916 | 380916 | Lrch1     | leucine-rich repeats and calponin homology (CH) domain containing 1                |
| TC08000030 | 0.029497 | -1.61399 | RHEB_cKO down vs WT | -0.69063 -3σ | 8 E1 8      | 192156 | 192156 | Mvd       | mevalonate (diphospho) decarboxylase                                               |
| TC11000028 | 0.035105 | -1.6152  | RHEB_cKO down vs WT | -0.69171 -3σ | 11 B1.3 11  | 14923  | 14923  | Guk1      | guanylate kinase 1                                                                 |
| TC12000011 | 0.370411 | -1.61524 | RHEB_cKO down vs WT | -0.69175 -3σ | 12 E-F1 12  | 13386  | 13386  | Dlk1      | delta-like 1 homolog (Drosophila)                                                  |
| TC01000013 | 0.055432 | -1.61557 | RHEB_cKO down vs WT | -0.69204 -3σ | 1 G3 1      | 226518 | 226518 | Nmnat2    | nicotinamide nucleotide adenyltransferase 2                                        |
| TC10000003 | 0.002015 | -1.61588 | RHEB_cKO down vs WT | -0.69232 -3σ | 10 B2 10 :  | 140742 | 140742 | Sesn1     | sestrin 1                                                                          |
| TC07000045 | 0.051006 | -1.61631 | RHEB_cKO down vs WT | -0.69271 -3σ | ---         | ---    | ---    | Gm10153   | predicted gene 10153                                                               |
| TC01000038 | 0.063514 | -1.61775 | RHEB_cKO down vs WT | -0.69399 -3σ | 1 H3 1 80.  | 15951  | 15951  | Iff1204   | interferon activated gene 204                                                      |
| TC14000010 | 0.00507  | -1.6184  | RHEB_cKO down vs WT | -0.69457 -3σ | ---         | ---    | ---    | Gm6055    | predicted gene 6055                                                                |
| TC14000020 | 0.225342 | -1.61851 | RHEB_cKO down vs WT | -0.69467 -3σ | 14 C1 14    | 11731  | 11731  | Ang2      | angiogenin, ribonuclease A family, member 2                                        |
| TC13000017 | 0.142573 | -1.61859 | RHEB_cKO down vs WT | -0.69473 -3σ | 13 A3.3 1:  | 73102  | 73102  | Slc22a23  | solute carrier family 22, member 23                                                |
| TC10000022 | 0.011594 | -1.61869 | RHEB_cKO down vs WT | -0.69483 -3σ | 10 B4 10    | 70423  | 70423  | Tspan15   | tetraspanin 15                                                                     |
| TC16000017 | 0.064455 | -1.62017 | RHEB_cKO down vs WT | -0.69614 -3σ | 16 C1.1 16  | 56277  | 56277  | Tmem45a   | transmembrane protein 45a                                                          |
| TC11000025 | 0.007431 | -1.62046 | RHEB_cKO down vs WT | -0.69641 -3σ | 11 B2 11 :  | 11671  | 11671  | Aldh3a2   | aldehyde dehydrogenase family 3, subfamily A2                                      |
| TC06000033 | 0.002597 | -1.62071 | RHEB_cKO down vs WT | -0.69663 -3σ | 6 G2 6 74.  | 16832  | 16832  | Ldhb      | lactate dehydrogenase B                                                            |
| TC11000031 | 0.281554 | -1.621   | RHEB_cKO down vs WT | -0.69689 -3σ | 11 B4 11    | 216892 | 216892 | Spns2     | spinster homolog 2                                                                 |
| TC10000000 | 0.028249 | -1.62111 | RHEB_cKO down vs WT | -0.69698 -3σ | 10 A2 10 :  | 22634  | 22634  | Plagl1    | pleiomorphic adenoma gene-like 1                                                   |
| TC17000028 | 0.006803 | -1.62113 | RHEB_cKO down vs WT | -0.697 -3σ   | 17 B1 17 1  | 15024  | 15024  | H2-T10    | histocompatibility 2, T region locus 10                                            |
| TC11000012 | 0.000996 | -1.62141 | RHEB_cKO down vs WT | -0.69725 -3σ | 11 B5 11 :  | 16882  | 16882  | Lig3      | ligase III, DNA, ATP-dependent                                                     |
| TC19000004 | 0.242978 | -1.62149 | RHEB_cKO down vs WT | -0.69732 -3σ | 19 C1 19    | 78753  | 78753  | Lipm      | lipase, family member M                                                            |
| TC05000033 | 0.012018 | -1.6218  | RHEB_cKO down vs WT | -0.6976 -3σ  | 5 G2 5 74.  | 17969  | 17969  | Ncf1      | neutrophil cytosolic factor 1                                                      |
| TC12000008 | 0.004433 | -1.6219  | RHEB_cKO down vs WT | -0.69769 -3σ | 12 12 E     | 14874  | 14874  | Gstz1     | glutathione transferase zeta 1 (maleylacetoacetate isomerase)                      |
| TC12000013 | 0.022711 | -1.62212 | RHEB_cKO down vs WT | -0.69788 -3σ | ---         | ---    | ---    | Gm3625    | predicted gene 3625                                                                |
| TC04000011 | 0.084667 | -1.62212 | RHEB_cKO down vs WT | -0.69788 -3σ | 4 C7 4      | 74754  | 74754  | Dhcr24    | 24-dehydrocholesterol reductase                                                    |
| TC01000002 | 0.369945 | -1.62236 | RHEB_cKO down vs WT | -0.69809 -3σ | 1 B 1 18.6  | 16178  | 16178  | Il1r2     | interleukin 1 receptor, type II                                                    |
| TC04000004 | 0.29067  | -1.62244 | RHEB_cKO down vs WT | -0.69817 -3σ | 4 B1 4      | 53614  | 53614  | Reck      | reversion-inducing-cysteine-rich protein with kazal motifs                         |
| TC01000000 | 0.013535 | -1.62317 | RHEB_cKO down vs WT | -0.69881 -3σ | 1 1 A2      | 12421  | 12421  | Rb1cc1    | RB1-inducible coiled-coil 1                                                        |
| TC13000004 | 0.053265 | -1.62335 | RHEB_cKO down vs WT | -0.69898 -3σ | 13 A5 13 :  | 14538  | 14538  | Gcnt2     | glucosaminyl (N-acetyl) transferase 2, I-branching enzyme                          |
| TC03000012 | 0.260082 | -1.62369 | RHEB_cKO down vs WT | -0.69928 -3σ | 3 G1 3      | 71994  | 71994  | Cnn3      | calponin 3, acidic                                                                 |
| TC13000027 | 0.376178 | -1.62505 | RHEB_cKO down vs WT | -0.70048 -3σ | 13 D2.3 1:  | 16392  | 16392  | Isl1      | ISL1 transcription factor, LIM/homeodomain                                         |
| TC07000010 | 0.142044 | -1.62535 | RHEB_cKO down vs WT | -0.70075 -3σ | 7 F3 7 76.: | 360216 | 360216 | Zranb1    | zinc finger, RAN-binding domain containing 1                                       |
| TC18000000 | 0.1924   | -1.62595 | RHEB_cKO down vs WT | -0.70128 -3σ | 18 E1 18 :  | 16149  | 16149  | Cd74      | CD74 antigen (invariant polypeptide of major histocompatibility complex, class II) |
| TC11000035 | 0.000483 | -1.62638 | RHEB_cKO down vs WT | -0.70167 -3σ | 11 D 11     | 76408  | 76408  | Abcc3     | ATP-binding cassette, sub-family C (CFTR/MRP), member 3                            |
| TC16000002 | 0.005108 | -1.62734 | RHEB_cKO down vs WT | -0.70252 -3σ | 16 A3 16 1  | 11877  | 11877  | Arvcf     | armadillo repeat gene deleted in velo-cardio-facial syndrome                       |
| TC10000024 | 0.265462 | -1.62755 | RHEB_cKO down vs WT | -0.7027 -3σ  | 10 B5-C1 :  | 12833  | 12833  | Col6a1    | collagen, type VI, alpha 1                                                         |
| TC03000005 | 0.207005 | -1.62776 | RHEB_cKO down vs WT | -0.70289 -3σ | 3 F2.1 3 4: | 13040  | 13040  | Ctss      | cathepsin S                                                                        |
| TC14000022 | 0.038429 | -1.62885 | RHEB_cKO down vs WT | -0.70385 -3σ | 14 D1 14    | 219151 | 219151 | Scara3    | scavenger receptor class A, member 3                                               |
| TC03000012 | 0.050812 | -1.62957 | RHEB_cKO down vs WT | -0.70449 -3σ | 3 G1 3 52.  | 14066  | 14066  | F3        | coagulation factor III                                                             |
| TC08000015 | 0.025964 | -1.63168 | RHEB_cKO down vs WT | -0.70636 -3σ | 8 E2 8      | 73647  | 73647  | Capn9     | calpain 9                                                                          |
| TC04000010 | 0.023481 | -1.63325 | RHEB_cKO down vs WT | -0.70774 -3σ | 4 D3 4      | 100163 | 100163 | Pafah2    | platelet-activating factor acetylhydrolase 2                                       |
| TC15000010 | 0.081785 | -1.63356 | RHEB_cKO down vs WT | -0.70802 -3σ | 15 E1 15    | 23970  | 23970  | Pacsin2   | protein kinase C and casein kinase substrate in neurons 2                          |
| TC19000014 | 0.153015 | -1.63426 | RHEB_cKO down vs WT | -0.70864 -3σ | 19 C3 19 :  | 20411  | 20411  | Sorbs1    | sorbin and SH3 domain containing 1                                                 |
| TC06000004 | 0.068618 | -1.63459 | RHEB_cKO down vs WT | -0.70893 -3σ | 6 B2.1 6    | 109218 | 109218 | Tmem139   | transmembrane protein 139                                                          |



|            |          |          |                     |          |     |             |          |          |            |                                                                     |
|------------|----------|----------|---------------------|----------|-----|-------------|----------|----------|------------|---------------------------------------------------------------------|
| TC16000004 | 0.00122  | -1.63462 | RHEB_cKO down vs WT | -0.70896 | -3σ | 16 B3 16    | 13026    | 13026    | Pcylt1a    | phosphate cytidyltransferase 1, choline, alpha isoform              |
| TC02000002 | 0.004004 | -1.63496 | RHEB_cKO down vs WT | -0.70926 | -3σ | 2 2 11.87   | 1.01E+08 | 1.01E+08 | Gm20038    | predicted gene, 20038                                               |
| TC10000008 | 0.089908 | -1.63595 | RHEB_cKO down vs WT | -0.71013 | -3σ | 10 C1 10    | 50492    | 50492    | Thop1      | thimet oligopeptidase 1                                             |
| TC17000027 | 0.057688 | -1.63657 | RHEB_cKO down vs WT | -0.71068 | -3σ | 17 B1 17    | 14961    | 14961    | H2-Ab1     | histocompatibility 2, class II antigen A, beta 1                    |
| TC12000007 | 0.058247 | -1.63674 | RHEB_cKO down vs WT | -0.71082 | -3σ | 12 C3 12    | 69522    | 69522    | 2310002D06 | RIKEN cDNA 2310002D06 gene                                          |
| TC01000035 | 0.156048 | -1.63675 | RHEB_cKO down vs WT | -0.71084 | -3σ | 1 H3 1 79.  | 14127    | 14127    | Fcer1g     | Fc receptor, IgE, high affinity I, gamma polypeptide                |
| TC1100004C | 0.028163 | -1.637   | RHEB_cKO down vs WT | -0.71106 | -3σ | 11 E2 11    | 328035   | 328035   | Fads6      | fatty acid desaturase domain family, member 6                       |
| TC08000002 | 0.102759 | -1.63711 | RHEB_cKO down vs WT | -0.71115 | -3σ | 8 8 A3      | 56229    | 56229    | Thsd1      | thrombospondin, type I, domain 1                                    |
| TC0400001E | 0.01538  | -1.63789 | RHEB_cKO down vs WT | -0.71184 | -3σ | 4 D3 4 68.  | 15356    | 15356    | Hmgcl      | 3-hydroxy-3-methylglutaryl-Coenzyme A lyase                         |
| TC07000004 | 0.016614 | -1.63877 | RHEB_cKO down vs WT | -0.71261 | -3σ | 7 A3 7 14.  | 13094    | 13094    | Cyp2b9     | cytochrome P450, family 2, subfamily b, polypeptide 9               |
| TC19000005 | 0.03167  | -1.63935 | RHEB_cKO down vs WT | -0.71312 | -3σ | 19 A 19     | 75221    | 75221    | Dpp3       | dipeptidylpeptidase 3                                               |
| TC18000004 | 0.301399 | -1.63986 | RHEB_cKO down vs WT | -0.71357 | -3σ | 18 B3 18    | 433178   | 433178   | Spink14    | serine peptidase inhibitor, Kazal type 14                           |
| TC1500001E | 0.007718 | -1.64056 | RHEB_cKO down vs WT | -0.71419 | -3σ | 15 E1 15    | 52609    | 52609    | Cbx7       | chromobox 7                                                         |
| TC13000012 | 0.041417 | -1.64246 | RHEB_cKO down vs WT | -0.71586 | -3σ | 13 D2.2 13  | 77318    | 77318    | Ankrd55    | ankyrin repeat domain 55                                            |
| TC06000013 | 0.33486  | -1.64265 | RHEB_cKO down vs WT | -0.71603 | -3σ | 6 F1 6      | 50530    | 50530    | Mfap5      | microfibrillar associated protein 5                                 |
| TC12000024 | 0.032987 | -1.64299 | RHEB_cKO down vs WT | -0.71633 | -3σ | 12 12 F2    | 21981    | 21981    | Ppp1r13b   | protein phosphatase 1, regulatory (inhibitor) subunit 13B           |
| TC07000003 | 0.043396 | -1.64373 | RHEB_cKO down vs WT | -0.71697 | -3σ | 7 A3 7      | 1E+08    | 1E+08    | Gm4598     | predicted gene 4598                                                 |
| TC05000022 | 0.013485 | -1.64522 | RHEB_cKO down vs WT | -0.71828 | -3σ | 5 5 B2      | 17160    | 17160    | Man2b2     | mannosidase 2, alpha B2                                             |
| TC13000014 | 0.000327 | -1.64581 | RHEB_cKO down vs WT | -0.7188  | -3σ | 13 A1 13    | 83924    | 83924    | Gpr137b    | G protein-coupled receptor 137B                                     |
| TC09000017 | 0.103869 | -1.64617 | RHEB_cKO down vs WT | -0.71911 | -3σ | 9 9 A3      | 71946    | 71946    | Endod1     | endonuclease domain containing 1                                    |
| TC14000007 | 0.041287 | -1.64725 | RHEB_cKO down vs WT | -0.72006 | -3σ | ---         | ---      | ---      | Traj14     | T cell receptor alpha joining 14                                    |
| TC01000012 | 0.139041 | -1.64782 | RHEB_cKO down vs WT | -0.72056 | -3σ | 1 F 1       | 329260   | 329260   | Dennd1b    | DENN/MADD domain containing 1B                                      |
| TC0200000E | 0.000215 | -1.64932 | RHEB_cKO down vs WT | -0.72187 | -3σ | 2 B 2 23.5  | 227753   | 227753   | Gsn        | gelsolin                                                            |
| TC19000003 | 0.114229 | -1.64976 | RHEB_cKO down vs WT | -0.72226 | -3σ | 19 A-B 19   | 14675    | 14675    | Gna14      | guanine nucleotide binding protein, alpha 14                        |
| TC1900001E | 0.12169  | -1.65014 | RHEB_cKO down vs WT | -0.72259 | -3σ | ---         | ---      | ---      | Gm10197    | predicted gene 10197                                                |
| TC11000011 | 0.0252   | -1.65315 | RHEB_cKO down vs WT | -0.72521 | -3σ | 11 B5 11    | 216961   | 216961   | Coro6      | coronin 6                                                           |
| TC13000012 | 0.081033 | -1.65374 | RHEB_cKO down vs WT | -0.72573 | -3σ | 13 D2.1 13  | 74559    | 74559    | Elov7      | ELOVL family member 7, elongation of long chain fatty acids (yeast) |
| TC06000015 | 0.002179 | -1.65377 | RHEB_cKO down vs WT | -0.72576 | -3σ | 6 F3 6      | 408064   | 408064   | BC064078   | cDNA sequence BC064078                                              |
| TC09000023 | 0.349165 | -1.65417 | RHEB_cKO down vs WT | -0.7261  | -3σ | 9 B 9 31.6  | 16949    | 16949    | Lox1       | lysyl oxidase-like 1                                                |
| TC02000015 | 0.005845 | -1.65438 | RHEB_cKO down vs WT | -0.72629 | -3σ | 2 F1 2 61.1 | 99138    | 99138    | Stard7     | START domain containing 7                                           |
| TC19000013 | 0.009121 | -1.65541 | RHEB_cKO down vs WT | -0.72719 | -3σ | 19 C1 19    | 240614   | 240614   | Ranbp6     | RAN binding protein 6                                               |
| TC19000012 | 0.008888 | -1.65567 | RHEB_cKO down vs WT | -0.72742 | -3σ | 19 B 19     | 1E+08    | 1E+08    | Gm3775     | predicted gene 3775                                                 |
| TC02000034 | 0.035602 | -1.65585 | RHEB_cKO down vs WT | -0.72757 | -3σ | 2 B 2       | 76899    | 76899    | Golga1     | golgi autoantigen, golgin subfamily a, 1                            |
| TC08000025 | 0.405637 | -1.65664 | RHEB_cKO down vs WT | -0.72826 | -3σ | 8 C2 8      | 13617    | 13617    | Ednra      | endothelin receptor type A                                          |
| TC12000012 | 0.012413 | -1.65677 | RHEB_cKO down vs WT | -0.72837 | -3σ | 12 F1 12    | 104759   | 104759   | Pld4       | phospholipase D family, member 4                                    |
| TC09000025 | 0.078253 | -1.6572  | RHEB_cKO down vs WT | -0.72875 | -3σ | 9 C 9       | 235442   | 235442   | Rab8b      | RAB8B, member RAS oncogene family                                   |
| TC08000024 | 0.082465 | -1.6573  | RHEB_cKO down vs WT | -0.72884 | -3σ | ---         | ---      | ---      | Gm11034    | predicted gene 11034                                                |
| TC02000051 | 0.323349 | -1.65841 | RHEB_cKO down vs WT | -0.7298  | -3σ | 2 H3 2      | 209232   | 209232   | Wfdc5      | WAP four-disulfide core domain 5                                    |
| TC14000001 | 0.02892  | -1.65876 | RHEB_cKO down vs WT | -0.7301  | -3σ | ---         | ---      | ---      | Gm15935    | predicted gene 15935                                                |
| TC03000002 | 0.027976 | -1.65895 | RHEB_cKO down vs WT | -0.73027 | -3σ | 3 A3 3      | 67576    | 67576    | 4930429B   | RIKEN cDNA 4930429B21 gene                                          |
| TC0X00000C | 0.025669 | -1.65971 | RHEB_cKO down vs WT | -0.73093 | -3σ | X A1.1 X 3  | 54636    | 54636    | Wdr45      | WD repeat domain 45                                                 |
| TC03000003 | 0.014902 | -1.66047 | RHEB_cKO down vs WT | -0.7316  | -3σ | 3 C 3       | 211666   | 211666   | Mgst2      | microsomal glutathione S-transferase 2                              |
| TC07000005 | 0.002005 | -1.66272 | RHEB_cKO down vs WT | -0.73354 | -3σ | 7 A3 7      | 51798    | 51798    | Ech1       | enoyl coenzyme A hydratase 1, peroxisomal                           |
| TC01000008 | 0.04647  | -1.66322 | RHEB_cKO down vs WT | -0.73398 | -3σ | ---         | ---      | ---      | Gm15369    | predicted gene 15369                                                |
| TC08000015 | 0.117521 | -1.66389 | RHEB_cKO down vs WT | -0.73456 | -3σ | 8 E2 8      | 69581    | 69581    | Rhou       | ras homolog family member U                                         |
| TC10000005 | 0.00322  | -1.66444 | RHEB_cKO down vs WT | -0.73503 | -3σ | 10 C1 10    | 70615    | 70615    | Ankrd24    | ankyrin repeat domain 24                                            |
| TC02000015 | 0.008899 | -1.66459 | RHEB_cKO down vs WT | -0.73516 | -3σ | ---         | ---      | ---      | Gm14013    | predicted gene 14013                                                |
| TC11000034 | 0.197345 | -1.66519 | RHEB_cKO down vs WT | -0.73569 | -3σ | 11 C 11     | 66569    | 66569    | Gdpd1      | glycerophosphodiester phosphodiesterase domain containing 1         |
| TC01000003 | 0.080613 | -1.66758 | RHEB_cKO down vs WT | -0.73776 | -3σ | 1 C1.1 1    | 227102   | 227102   | Ormdl1     | ORM1-like 1 (S. cerevisiae)                                         |
| TC19000015 | 0.354945 | -1.66826 | RHEB_cKO down vs WT | -0.73834 | -3σ | 19 C3 19    | 545291   | 545291   | Hpse2      | heparanase 2                                                        |
| TC03000004 | 0.10744  | -1.66864 | RHEB_cKO down vs WT | -0.73868 | -3σ | 3 D 3       | 229333   | 229333   | C130079G   | RIKEN cDNA C130079G13 gene                                          |
| TC1200000E | 0.000137 | -1.67021 | RHEB_cKO down vs WT | -0.74003 | -3σ | 12 C3 12    | 210762   | 210762   | Ppp1r36    | protein phosphatase 1, regulatory subunit 36                        |
| TC1200001C | 0.153298 | -1.67056 | RHEB_cKO down vs WT | -0.74033 | -3σ | 12 E 12     | 68149    | 68149    | Otub2      | OTU domain, ubiquitin aldehyde binding 2                            |
| TC04000032 | 0.127185 | -1.67061 | RHEB_cKO down vs WT | -0.74037 | -3σ | 4 C7 4      | 29864    | 29864    | Rnf11      | ring finger protein 11                                              |
| TC02000023 | 0.169985 | -1.6712  | RHEB_cKO down vs WT | -0.74088 | -3σ | 2 H1 2      | 98932    | 98932    | Myl9       | myosin, light polypeptide 9, regulatory                             |
| TC12000008 | 0.306501 | -1.67165 | RHEB_cKO down vs WT | -0.74128 | -3σ | 12 D2 12    | 217721   | 217721   | Mfsd7c     | major facilitator superfamily domain containing 7C                  |
| TC19000014 | 0.178186 | -1.67337 | RHEB_cKO down vs WT | -0.74276 | -3σ | 19 C2 19    | 15925    | 15925    | Ide        | insulin degrading enzyme                                            |
| TC0900002C | 0.331172 | -1.67482 | RHEB_cKO down vs WT | -0.74401 | -3σ | 9 A5.1 9    | 244810   | 244810   | AW55198    | expressed sequence AW551984                                         |
| TC09000011 | 0.032674 | -1.67571 | RHEB_cKO down vs WT | -0.74477 | -3σ | 9 E3.3 9    | 22038    | 22038    | Plscr1     | phospholipid scramblase 1                                           |
| TC14000021 | 0.500465 | -1.67652 | RHEB_cKO down vs WT | -0.74547 | -3σ | 14 C3 14    | 17228    | 17228    | Cma1       | chymase 1, mast cell                                                |
| TC01000014 | 0.37071  | -1.67746 | RHEB_cKO down vs WT | -0.74628 | -3σ | 1 H2.1 1    | 474332   | 474332   | Dnm3os     | dynamins 3, opposite strand                                         |
| TC0400004C | 0.010476 | -1.67868 | RHEB_cKO down vs WT | -0.74733 | -3σ | 4 E2 4 80.1 | 100198   | 100198   | H6pd       | hexose-6-phosphate dehydrogenase (glucose 1-dehydrogenase)          |
| TC1500000C | 0.104153 | -1.67869 | RHEB_cKO down vs WT | -0.74734 | -3σ | 15 A 15 2.  | 13132    | 13132    | Dab2       | disabled 2, mitogen-responsive phosphoprotein                       |
| TC05000007 | 0.376096 | -1.67897 | RHEB_cKO down vs WT | -0.74757 | -3σ | 5 C3.3 5 3  | 18595    | 18595    | Pdgfra     | platelet derived growth factor receptor, alpha polypeptide          |
| TC03000005 | 0.016911 | -1.68022 | RHEB_cKO down vs WT | -0.74865 | -3σ | 3 E1 3      | 242083   | 242083   | Ppm1l      | protein phosphatase 1 (formerly 2C)-like                            |
| TC07000014 | 0.084007 | -1.68064 | RHEB_cKO down vs WT | -0.74901 | -3σ | 7 E3 7      | 207728   | 207728   | Pde2a      | phosphodiesterase 2A, cGMP-stimulated                               |
| TC15000023 | 0.111285 | -1.68107 | RHEB_cKO down vs WT | -0.74938 | -3σ | 15 D1 15    | 83492    | 83492    | Gsdmc      | gasdermin C                                                         |
| TC07000011 | 0.000102 | -1.68145 | RHEB_cKO down vs WT | -0.7497  | -3σ | 7 D3 7      | 233424   | 233424   | Tmc3       | transmembrane channel-like gene family 3                            |
| TC05000025 | 0.014675 | -1.68251 | RHEB_cKO down vs WT | -0.75061 | -3σ | 5 E5 5      | 67266    | 67266    | Fam69a     | family with sequence similarity 69, member A                        |
| TC08000017 | 0.081707 | -1.68314 | RHEB_cKO down vs WT | -0.75115 | -3σ | 8 A1.1 8 6  | 14456    | 14456    | Gas6       | growth arrest specific 6                                            |
| TC1100000E | 0.013731 | -1.68451 | RHEB_cKO down vs WT | -0.75233 | -3σ | 11 B1.3 11  | 20362    | 20362    | Sept8      | septin 8                                                            |
| TC15000001 | 0.01874  | -1.68464 | RHEB_cKO down vs WT | -0.75244 | -3σ | ---         | 1.02E+08 | 1.02E+08 | Mir7212    | microRNA 7212                                                       |
| TC02000055 | 0.021542 | -1.68643 | RHEB_cKO down vs WT | -0.75397 | -3σ | 2 H3 2      | 407243   | 407243   | Tmem189    | transmembrane protein 189                                           |
| TC08000011 | 0.028416 | -1.68694 | RHEB_cKO down vs WT | -0.75441 | -3σ | 8 C5 8      | 434341   | 434341   | Nlrc5      | NLR family, CARD domain containing 5                                |
| TC01000002 | 0.002025 | -1.68757 | RHEB_cKO down vs WT | -0.75495 | -3σ | 1 B 1 17.9  | 18143    | 18143    | Npas2      | neuronal PAS domain protein 2                                       |
| TC04000033 | 0.030785 | -1.68778 | RHEB_cKO down vs WT | -0.75513 | -3σ | 4 D1 4 53.  | 14073    | 14073    | Faah       | fatty acid amide hydrolase                                          |
| TC03000022 | 0.019241 | -1.68794 | RHEB_cKO down vs WT | -0.75526 | -3σ | 3 F1 3      | 80890    | 80890    | Trim2      | tripartite motif-containing 2                                       |
| TC09000001 | 0.005622 | -1.68884 | RHEB_cKO down vs WT | -0.75603 | -3σ | 9 9 A3      | 75747    | 75747    | Sesn3      | sestrin 3                                                           |
| TC12000005 | 0.097828 | -1.68895 | RHEB_cKO down vs WT | -0.75613 | -3σ | 12 C2 12    | 1.01E+08 | 1.01E+08 | Abhd12b    | abhydrolase domain containing 12B                                   |
| TC0500002E | 0.093035 | -1.69033 | RHEB_cKO down vs WT | -0.75731 | -3σ | 5 C3.3 5    | 56183    | 56183    | Nmu        | neuromedin U                                                        |
| TC07000004 | 0.019323 | -1.69109 | RHEB_cKO down vs WT | -0.75795 | -3σ | 7 A3 7 14.  | 13089    | 13089    | Cyp2b13    | cytochrome P450, family 2, subfamily b, polypeptide 13              |
| TC0800001C | 0.054472 | -1.69303 | RHEB_cKO down vs WT | -0.75961 | -3σ | 8 C5 8      | 69543    | 69543    | Capns2     | calpain, small subunit 2                                            |
| TC02000015 | 0.056209 | -1.69361 | RHEB_cKO down vs WT | -0.76011 | -3σ | 2 E2 2      | 22034    | 22034    | Traf6      | TNF receptor-associated factor 6                                    |
| TC07000003 | 0.144987 | -1.69367 | RHEB_cKO down vs WT | -0.76015 | -3σ | 7 A3 7      | 69547    | 69547    | Nkpd1      | NTPase, KAP family P-loop domain containing 1                       |
| TC01000033 | 0.004498 | -1.69381 | RHEB_cKO down vs WT | -0.76027 | -3σ | 1 1 H1      | 15064    | 15064    | Mr1        | major histocompatibility complex, class I-related                   |
| TC15000003 | 0.34821  | -1.69538 | RHEB_cKO down vs WT | -0.76161 | -3σ | 15 D1 15    | 18133    | 18133    | Nov        | nephroblastoma overexpressed gene                                   |
| TC04000004 | 0.035461 | -1.69625 | RHEB_cKO down vs WT | -0.76235 | -3σ | 4 4 B1      | 56323    | 56323    | Dnajb5     | Dnaj heat shock protein family (Hsp40) member B5</                  |

|            |          |          |                     |              |             |          |          |          |                                                                              |
|------------|----------|----------|---------------------|--------------|-------------|----------|----------|----------|------------------------------------------------------------------------------|
| TC1000000E | 0.00135  | -1.6975  | RHEB_cKO down vs WT | -0.76341 -3σ | 10 C1 10 E  | 18483    | 18483    | Palm     | paralemmin                                                                   |
| TC0700000E | 0.037386 | -1.69892 | RHEB_cKO down vs WT | -0.76462 -3σ | 7 A3 7      | 60594    | 60594    | Capn12   | calpain 12                                                                   |
| TC11000027 | 0.087079 | -1.70088 | RHEB_cKO down vs WT | -0.76628 -3σ | 11 B1.3 11  | 52570    | 52570    | Ccdc69   | coiled-coil domain containing 69                                             |
| TC0900000E | 0.027026 | -1.70096 | RHEB_cKO down vs WT | -0.76635 -3σ | 9 A5.3 9    | 58233    | 58233    | Dnaj4    | DnaJ heat shock protein family (Hsp40) member A4                             |
| TC1500001E | 0.115068 | -1.70188 | RHEB_cKO down vs WT | -0.76713 -3σ | 15 E1 15    | 319953   | 319953   | Ttl1     | tubulin tyrosine ligase-like 1                                               |
| TC02000024 | 0.130357 | -1.70253 | RHEB_cKO down vs WT | -0.76768 -3σ | 2 H3 2      | 76080    | 76080    | Ttpal    | tocopherol (alpha) transfer protein-like                                     |
| TC0800002E | 0.005892 | -1.7041  | RHEB_cKO down vs WT | -0.76901 -3σ | 8 E1 8      | 76527    | 76527    | Il34     | interleukin 34                                                               |
| TC08000001 | 0.149244 | -1.70505 | RHEB_cKO down vs WT | -0.76982 -3σ | 8 A1.1 8 7  | 26889    | 26889    | Cln8     | ceroid-lipofuscinosis, neuronal 8                                            |
| TC04000032 | 2.43E-05 | -1.7052  | RHEB_cKO down vs WT | -0.76994 -3σ | 4 C7 4 51.  | 12580    | 12580    | Cdkn2c   | cyclin-dependent kinase inhibitor 2C (p18, inhibits CDK4)                    |
| TC06000012 | 0.024207 | -1.70592 | RHEB_cKO down vs WT | -0.77055 -3σ | 6 F1 6 53.  | 28006    | 28006    | Fam21    | family with sequence similarity 21                                           |
| TC0600001E | 0.053794 | -1.7063  | RHEB_cKO down vs WT | -0.77087 -3σ | 6 A3.1 6    | 319832   | 319832   | Tmem229  | transmembrane protein 229A                                                   |
| TC0500000E | 0.205716 | -1.70834 | RHEB_cKO down vs WT | -0.77259 -3σ | 5 C3.2 5    | 70701    | 70701    | Nipal1   | NIPA-like domain containing 1                                                |
| TC1200000E | 0.340038 | -1.70881 | RHEB_cKO down vs WT | -0.77299 -3σ | 12 A1.1 11  | 23967    | 23967    | Osr1     | odd-skipped related 1 (Drosophila)                                           |
| TC0200001E | 0.206029 | -1.71225 | RHEB_cKO down vs WT | -0.7759 -3σ  | 2 2 E3      | 13711    | 13711    | Elf5     | E74-like factor 5                                                            |
| TC0400003E | 0.009824 | -1.71233 | RHEB_cKO down vs WT | -0.77596 -3σ | ---         | ---      | ---      | Gm13080  | predicted gene 13080                                                         |
| TC09000017 | 0.392497 | -1.71476 | RHEB_cKO down vs WT | -0.77801 -3σ | 9 A2 9      | 244698   | 244698   | Heph1    | hephaestin-like 1                                                            |
| TC09000014 | 0.031488 | -1.715   | RHEB_cKO down vs WT | -0.77821 -3σ | 9 F2 9      | 16578    | 16578    | Kif9     | kinesin family member 9                                                      |
| TC01000017 | 0.071607 | -1.71522 | RHEB_cKO down vs WT | -0.7784 -3σ  | 1 H5 1 84.  | 320404   | 320404   | Itpkb    | inositol 1,4,5-trisphosphate 3-kinase B                                      |
| TC13000022 | 0.002468 | -1.71698 | RHEB_cKO down vs WT | -0.77987 -3σ | 13 B3 13    | 66129    | 66129    | Aaed1    | AhpC/TSA antioxidant enzyme domain containing 1                              |
| TC08000024 | 0.011971 | -1.71781 | RHEB_cKO down vs WT | -0.78057 -3σ | 8 8 C1      | 70807    | 70807    | Arrec2   | arrestin domain containing 2                                                 |
| TC08000024 | 0.007066 | -1.7194  | RHEB_cKO down vs WT | -0.7819 -3σ  | 8 B3.3 8    | 546071   | 546071   | Mast3    | microtubule associated serine/threonine kinase 3                             |
| TC1400000E | 0.371977 | -1.71998 | RHEB_cKO down vs WT | -0.78239 -3σ | 14 B 14 2C  | 14560    | 14560    | Gdf10    | growth differentiation factor 10                                             |
| TC0100003C | 0.043818 | -1.72056 | RHEB_cKO down vs WT | -0.78288 -3σ | 1 E4 1 56.  | 54354    | 54354    | Rassf5   | Ras association (RalGDS/AF-6) domain family member 5                         |
| TC05000011 | 0.005811 | -1.72127 | RHEB_cKO down vs WT | -0.78347 -3σ | 5 F 5       | 72392    | 72392    | Tmem175  | transmembrane protein 175                                                    |
| TC0700001E | 0.021792 | -1.72365 | RHEB_cKO down vs WT | -0.78547 -3σ | 7 7 F2      | 19024    | 19024    | Ppfibp2  | PTPRF interacting protein, binding protein 2 (liprin beta 2)                 |
| TC0700001E | 0.014174 | -1.72392 | RHEB_cKO down vs WT | -0.78569 -3σ | 7 7 E2      | 72461    | 72461    | Prcp     | prolylcarboxypeptidase (angiotensinase C)                                    |
| TC08000017 | 0.001452 | -1.72504 | RHEB_cKO down vs WT | -0.78663 -3σ | 8 A1.3 8 1  | 11601    | 11601    | Angpt2   | angiopoietin 2                                                               |
| TC1100001E | 0.001174 | -1.72505 | RHEB_cKO down vs WT | -0.78664 -3σ | 11 11 E1    | 26399    | 26399    | Map2k6   | mitogen-activated protein kinase kinase 6                                    |
| TC1000002C | 0.033698 | -1.7254  | RHEB_cKO down vs WT | -0.78693 -3σ | ---         | ---      | ---      | Gm15199  | predicted gene 15199                                                         |
| TC1900000E | 0.032729 | -1.72728 | RHEB_cKO down vs WT | -0.7885 -3σ  | 19 C3 19 E  | 20250    | 20250    | Scd2     | stearoyl-Coenzyme A desaturase 2                                             |
| TC1900000E | 0.058753 | -1.72768 | RHEB_cKO down vs WT | -0.78884 -3σ | 19 C3 19    | 226122   | 226122   | Ubtd1    | ubiquitin domain containing 1                                                |
| TC03000014 | 0.039617 | -1.72863 | RHEB_cKO down vs WT | -0.78963 -3σ | 3 G3 3      | 69117    | 69117    | Adh6a    | alcohol dehydrogenase 6A (class V)                                           |
| TC04000041 | 0.179753 | -1.72867 | RHEB_cKO down vs WT | -0.78967 -3σ | 4 E2 4 87.  | 79554    | 79554    | Cptp     | ceramide-1-phosphate transfer protein                                        |
| TC07000012 | 0.003096 | -1.73101 | RHEB_cKO down vs WT | -0.79162 -3σ | 7 E1 7 51.  | 23859    | 23859    | Dlg2     | discs, large homolog 2 (Drosophila)                                          |
| TC0500002E | 0.011846 | -1.73128 | RHEB_cKO down vs WT | -0.79184 -3σ | 5 F 5 52.2. | 14020    | 14020    | Evi5     | ecotropic viral integration site 5                                           |
| TC08000024 | 0.016142 | -1.73509 | RHEB_cKO down vs WT | -0.79501 -3σ | 8 8 C2      | 78514    | 78514    | Arhgap10 | Rho GTPase activating protein 10                                             |
| TC1700000E | 0.02478  | -1.73557 | RHEB_cKO down vs WT | -0.79541 -3σ | 17 B2 17    | 70274    | 70274    | Ly6g6e   | lymphocyte antigen 6 complex, locus G6E                                      |
| TC09000004 | 0.187011 | -1.73599 | RHEB_cKO down vs WT | -0.79576 -3σ | 9 9 B       | 53376    | 53376    | Usp2     | ubiquitin specific peptidase 2                                               |
| TC09000011 | 0.002808 | -1.73618 | RHEB_cKO down vs WT | -0.79592 -3σ | 9 E2 9      | 12040    | 12040    | Bckdhb   | branched chain ketoacid dehydrogenase E1, beta polypeptide                   |
| TC18000014 | 0.120752 | -1.737   | RHEB_cKO down vs WT | -0.7966 -3σ  | 18 E1 18    | 328967   | 328967   | Arhgef37 | Rho guanine nucleotide exchange factor (GEF) 37                              |
| TC0200000E | 0.059278 | -1.73855 | RHEB_cKO down vs WT | -0.79788 -3σ | ---         | ---      | ---      | Gm13608  | predicted gene 13608                                                         |
| TC1700001E | 0.011704 | -1.74061 | RHEB_cKO down vs WT | -0.7996 -3σ  | 17 A3.3 17  | 106581   | 106581   | Fam234a  | family with sequence similarity 234, member A                                |
| TC05000027 | 0.031106 | -1.74178 | RHEB_cKO down vs WT | -0.80056 -3σ | 5 E3 5      | 231474   | 231474   | Paqr3    | progesterin and adipoQ receptor family member III                            |
| TC1100000E | 0.005499 | -1.74385 | RHEB_cKO down vs WT | -0.80228 -3σ | 11 A4 11    | 78372    | 78372    | Snrnp25  | small nuclear ribonucleoprotein 25 (U11/U12)                                 |
| TC03000007 | 0.011693 | -1.74415 | RHEB_cKO down vs WT | -0.80253 -3σ | 3 E3-F1 3   | 21827    | 21827    | Thbs3    | thrombospondin 3                                                             |
| TC0500002E | 0.0254   | -1.74468 | RHEB_cKO down vs WT | -0.80296 -3σ | 5 C3.2 5 3  | 21682    | 21682    | Tec      | tec protein tyrosine kinase                                                  |
| TC11000032 | 0.022524 | -1.74635 | RHEB_cKO down vs WT | -0.80434 -3σ | 11 B5 11    | 216965   | 216965   | Taok1    | TAO kinase 1                                                                 |
| TC1100000E | 0.132777 | -1.74711 | RHEB_cKO down vs WT | -0.80497 -3σ | 11 B3 11    | 14457    | 14457    | Gas7     | growth arrest specific 7                                                     |
| TC07000001 | 0.226603 | -1.74794 | RHEB_cKO down vs WT | -0.80566 -3σ | 7 A1 7      | 381845   | 381845   | Rnf225   | ring finger protein 225                                                      |
| TC0400001E | 0.01259  | -1.74844 | RHEB_cKO down vs WT | -0.80607 -3σ | 4 E2 4      | 269604   | 269604   | Gpr157   | G protein-coupled receptor 157                                               |
| TC1000001E | 0.188829 | -1.74875 | RHEB_cKO down vs WT | -0.80632 -3σ | 10 D3 10    | 70061    | 70061    | Sdr9c7   | 4short chain dehydrogenase/reductase family 9C, member 7                     |
| TC0200003E | 0.094536 | -1.74885 | RHEB_cKO down vs WT | -0.8064 -3σ  | 2 C3 2 45.  | 14231    | 14231    | Fkbp7    | FK506 binding protein 7                                                      |
| TC1200001C | 0.033478 | -1.75092 | RHEB_cKO down vs WT | -0.80811 -3σ | 12 12 F1    | 74521    | 74521    | Ppp4r4   | protein phosphatase 4, regulatory subunit 4                                  |
| TC07000022 | 0.100258 | -1.75125 | RHEB_cKO down vs WT | -0.80839 -3σ | 7 A1 7 3.8  | 22776    | 22776    | Zim1     | zinc finger, imprinted 1                                                     |
| TC10000001 | 0.258562 | -1.75235 | RHEB_cKO down vs WT | -0.80929 -3σ | 10 A2 10    | 17684    | 17684    | Cited2   | Cbp/p300-interacting transactivator, with Glu/Asp-rich carboxy-terminal dom. |
| TC0700002E | 0.058222 | -1.75279 | RHEB_cKO down vs WT | -0.80966 -3σ | 7 A3 7      | 243881   | 243881   | Cyp2b23  | cytochrome P450, family 2, subfamily b, polypeptide 23                       |
| TC14000001 | 0.008295 | -1.75358 | RHEB_cKO down vs WT | -0.81031 -3σ | 14 14 A3    | 21834    | 21834    | Thrb     | thyroid hormone receptor beta                                                |
| TC1700001E | 0.030134 | -1.75368 | RHEB_cKO down vs WT | -0.81038 -3σ | 17 17 A3    | 50817    | 50817    | Capn15   | calpain 15                                                                   |
| TC0600001E | 0.083777 | -1.75428 | RHEB_cKO down vs WT | -0.81088 -3σ | 8 C1 8      | 21968    | 21968    | Tom1     | target of myb1 trafficking protein                                           |
| TC0400001E | 0.126627 | -1.75441 | RHEB_cKO down vs WT | -0.81098 -3σ | 4 D2.2 4    | 66260    | 66260    | Tmem54   | transmembrane protein 54                                                     |
| TC1100000E | 0.080404 | -1.75521 | RHEB_cKO down vs WT | -0.81164 -3σ | ---         | ---      | ---      | Gm12226  | predicted pseudogene 12226                                                   |
| TC1200001E | 0.037037 | -1.75563 | RHEB_cKO down vs WT | -0.81199 -3σ | 12 B1 12 1  | 11861    | 11861    | Arl4a    | ADP-ribosylation factor-like 4A                                              |
| TC0300001E | 0.017246 | -1.75718 | RHEB_cKO down vs WT | -0.81327 -3σ | 3 3 C       | 70804    | 70804    | Pgrmc2   | progesterone receptor membrane component 2                                   |
| TC18000002 | 0.035053 | -1.75727 | RHEB_cKO down vs WT | -0.81334 -3σ | 18 A2 18    | 68591    | 68591    | Mocos    | molybdenum cofactor sulfuryase                                               |
| TC1100001E | 0.040876 | -1.7586  | RHEB_cKO down vs WT | -0.81443 -3σ | 11 E2 11    | 26941    | 26941    | Slc9a3r1 | solute carrier family 9 (sodium/hydrogen exchanger), member 3 regulator 1    |
| TC0700004E | 0.02151  | -1.76331 | RHEB_cKO down vs WT | -0.81829 -3σ | 7 F3 7      | 114660   | 114660   | Etos1    | ectopic ossification 1                                                       |
| TC1600001E | 0.002338 | -1.76432 | RHEB_cKO down vs WT | -0.81912 -3σ | 16 C1.3 1E  | 224273   | 224273   | Crybg3   | beta-gamma crystallin domain containing 3                                    |
| TC0700000E | 0.004609 | -1.76643 | RHEB_cKO down vs WT | -0.82083 -3σ | 7 7 C       | 73724    | 73724    | Mcee     | methylmalonyl CoA epimerase                                                  |
| TC0400003E | 0.00048  | -1.76665 | RHEB_cKO down vs WT | -0.82102 -3σ | 4 D3 4 70.  | 17965    | 17965    | Nbl1     | neuroblastoma, suppression of tumorigenicity 1                               |
| TC04000007 | 0.360863 | -1.76825 | RHEB_cKO down vs WT | -0.82232 -3σ | 4 B3 4 33.  | 18405    | 18405    | Orm1     | orosomucoid 1                                                                |
| TC06000001 | 0.007611 | -1.77097 | RHEB_cKO down vs WT | -0.82454 -3σ | 6 A1 6      | 16543    | 16543    | Mdfic    | MyoD family inhibitor domain containing                                      |
| TC1000000C | 0.368211 | -1.77132 | RHEB_cKO down vs WT | -0.82483 -3σ | 10 A1 10    | 83397    | 83397    | Akap12   | A kinase (PRKA) anchor protein (gravin) 12                                   |
| TC1900000C | 0.076782 | -1.77135 | RHEB_cKO down vs WT | -0.82485 -3σ | 19 A 19     | 621603   | 621603   | Aldh3b2  | aldehyde dehydrogenase 3 family, member B2                                   |
| TC1000000E | 0.108588 | -1.77217 | RHEB_cKO down vs WT | -0.82552 -3σ | 10 B4 10    | 57319    | 57319    | Smpd13a  | sphingomyelin phosphodiesterase, acid-like 3A                                |
| TC1000000C | 0.007744 | -1.77347 | RHEB_cKO down vs WT | -0.82657 -3σ | 10 A2 10    | 66848    | 66848    | Fuca2    | fucosidase, alpha-L- 2, plasma                                               |
| TC04000032 | 0.021872 | -1.77501 | RHEB_cKO down vs WT | -0.82783 -3σ | 4 C7 4      | 140475   | 140475   | Bsnd     | Bartter syndrome, infantile, with sensorineural deafness (Barttin)           |
| TC03000024 | 0.306309 | -1.77608 | RHEB_cKO down vs WT | -0.82869 -3σ | 3 F1 3      | 74175    | 74175    | Crct1    | cysteine-rich C-terminal 1                                                   |
| TC1800001C | 0.018774 | -1.7808  | RHEB_cKO down vs WT | -0.83253 -3σ | 18 18 A2    | 64291    | 64291    | Osbpl1a  | oxysterol binding protein-like 1A                                            |
| TC0200001C | 0.187681 | -1.784   | RHEB_cKO down vs WT | -0.83512 -3σ | 2 C3 2      | 56508    | 56508    | Rapgef4  | Rap guanine nucleotide exchange factor (GEF) 4                               |
| TC1600000E | 0.364763 | -1.7866  | RHEB_cKO down vs WT | -0.83721 -3σ | 16 B3 16 2  | 14314    | 14314    | Fstl1    | follicle-stimulating-like 1                                                  |
| TC1600002C | 0.097165 | -1.7866  | RHEB_cKO down vs WT | -0.83722 -3σ | 16 C3.3 1E  | 16703    | 16703    | Krtap8-1 | keratin associated protein 8-1                                               |
| TC0400003E | 0.088219 | -1.78735 | RHEB_cKO down vs WT | -0.83783 -3σ | 4 D1-D3 4   | 14621    | 14621    | Gjb4     | gap junction protein, beta 4                                                 |
| TC03000002 | 0.023552 | -1.78743 | RHEB_cKO down vs WT | -0.83789 -3σ | 3 A3 3      | 69276    | 69276    | Sec62    | SEC62 homolog (S. cerevisiae)                                                |
| TC1800000C | 0.317196 | -1.788   | RHEB_cKO down vs WT | -0.83834 -3σ | 18 A1 18    | 140792   | 140792   | Colec12  | collectin sub-family member 12                                               |
| TC1500001E | 0.08431  | -1.78837 | RHEB_cKO down vs WT | -0.83864 -3σ | 15 D1 15 2  | 1.01E+08 | 1.01E+08 | Gm19510  | predicted gene, 19510                                                        |
| TC0X00002E | 0.004472 | -1.78876 | RHEB_cKO down vs WT | -0.83896 -3σ | X E3 X      | 215201   | 215201   | Trmt2b   | TRM2 tRNA methyltransferase 2B                                               |
| TC1800001E | 0.363345 | -1.78886 | RHEB_cKO down vs WT | -0.83904 -3σ | 18 C 18 24  | 12583    | 12583    | Cdo1     | cysteine dioxygenase 1, cytosolic                                            |
| TC02000004 | 0.055949 | -1.78965 | RHEB_cKO down vs WT | -0.83968 -3σ | 2 A3 2      | 67839    | 67839    | Gpsm1    | G-protein signalling modulator 1 (AGS3-like, C. elegans)                     |
| TC01000004 | 0.057391 | -1.78999 | RHEB_cKO down vs WT | -0.83995 -3σ | ---         | ---      | ---      | Gm11581  | predicted gene 11581                                                         |

|            |          |          |                     |              |             |        |        |           |                                                                              |
|------------|----------|----------|---------------------|--------------|-------------|--------|--------|-----------|------------------------------------------------------------------------------|
| TC11000011 | 0.011208 | -1.79003 | RHEB_cKO down vs WT | -0.83999 -3σ | 11 B5 11    | 68385  | 68385  | Tlcd1     | TLC domain containing 1                                                      |
| TC07000044 | 0.094629 | -1.79144 | RHEB_cKO down vs WT | -0.84112 -3σ | 7 7 F4      | 55987  | 55987  | Cpxm2     | carboxypeptidase X 2 (M14 family)                                            |
| TC16000021 | 0.051976 | -1.79405 | RHEB_cKO down vs WT | -0.84322 -3σ | 16 C3 3 16  | 16155  | 16155  | Il10rb    | interleukin 10 receptor, beta                                                |
| TC0X000005 | 0.265509 | -1.79584 | RHEB_cKO down vs WT | -0.84466 -3σ | X C3 X 42.  | 11835  | 11835  | Ar        | androgen receptor                                                            |
| TC08000005 | 0.002425 | -1.79826 | RHEB_cKO down vs WT | -0.84666 -3σ | 8 C3 8 41.  | 102093 | 102093 | Phkb      | phosphorylase kinase beta                                                    |
| TC12000002 | 0.082889 | -1.79881 | RHEB_cKO down vs WT | -0.84705 -3σ | 12 B-C 1 1. | 22160  | 22160  | Twist1    | twist basic helix-loop-helix transcription factor 1                          |
| TC11000007 | 0.28535  | -1.80157 | RHEB_cKO down vs WT | -0.84926 -3σ | 11 B2 11 3  | 76293  | 76293  | Mfap4     | microfibrillar-associated protein 4                                          |
| TC19000006 | 4.26E-05 | -1.80185 | RHEB_cKO down vs WT | -0.84948 -3σ | 19 C3 19    | 26456  | 26456  | Sema4g    | sema domain, immunoglobulin domain (Ig), transmembrane domain (TM) and       |
| TC07000024 | 0.013902 | -1.80336 | RHEB_cKO down vs WT | -0.85069 -3σ | 7 A3 7 9.9  | 11812  | 11812  | Apoc1     | apolipoprotein C-I                                                           |
| TC01000000 | 0.003295 | -1.80414 | RHEB_cKO down vs WT | -0.85132 -3σ | 1 A1 1      | 319263 | 319263 | Pcmtd1    | protein-L-isoaspartate (D-aspartate) O-methyltransferase domain containing 1 |
| TC03000005 | 0.054714 | -1.80635 | RHEB_cKO down vs WT | -0.85308 -3σ | 3 E1 3 29.  | 17380  | 17380  | Mme       | membrane metallo endopeptidase                                               |
| TC03000027 | 0.000984 | -1.80681 | RHEB_cKO down vs WT | -0.85345 -3σ | 3 F2.3 3    | 329735 | 329735 | 4933431E2 | RIKEN cDNA 4933431E20 gene                                                   |
| TC05000018 | 0.011118 | -1.80882 | RHEB_cKO down vs WT | -0.85505 -3σ | ---         | ---    | ---    | Gm6054    | predicted gene 6054                                                          |
| TC08000024 | 0.078425 | -1.80922 | RHEB_cKO down vs WT | -0.85537 -3σ | 8 B3.3 8    | 65972  | 65972  | Irf30     | interferon gamma inducible protein 30                                        |
| TC02000025 | 0.084758 | -1.80966 | RHEB_cKO down vs WT | -0.85572 -3σ | 2 H3 2 85.  | 19025  | 19025  | Ctsa      | cathepsin A                                                                  |
| TC02000028 | 0.00056  | -1.81048 | RHEB_cKO down vs WT | -0.85637 -3σ | 2 H4 2      | 245867 | 245867 | Pcmtd2    | protein-L-isoaspartate (D-aspartate) O-methyltransferase domain containing 2 |
| TC10000018 | 0.120935 | -1.81137 | RHEB_cKO down vs WT | -0.85708 -3σ | 10 A4 10    | 11846  | 11846  | Arg1      | arginase, liver                                                              |
| TC09000025 | 0.004798 | -1.81264 | RHEB_cKO down vs WT | -0.8581 -3σ  | 9 E3.3 9    | 213208 | 213208 | Il20rb    | interleukin 20 receptor beta                                                 |
| TC12000005 | 0.02492  | -1.81415 | RHEB_cKO down vs WT | -0.8593 -3σ  | 12 D3 12    | 71349  | 71349  | 5430427M  | RIKEN cDNA 5430427M07 gene                                                   |
| TC14000017 | 0.075585 | -1.81473 | RHEB_cKO down vs WT | -0.85976 -3σ | 14 B 14     | 432839 | 432839 | Gprin2    | G protein regulated inducer of neurite outgrowth 2                           |
| TC01000025 | 0.033823 | -1.81679 | RHEB_cKO down vs WT | -0.86139 -3σ | 1 C3 1      | 381269 | 381269 | Mreg      | melanoregulin                                                                |
| TC12000003 | 0.012815 | -1.81758 | RHEB_cKO down vs WT | -0.86202 -3σ | 12 A3 12    | 217463 | 217463 | Snx13     | sorting nexin 13                                                             |
| TC12000003 | 0.004683 | -1.81772 | RHEB_cKO down vs WT | -0.86213 -3σ | 12 B1 12 1  | 238130 | 238130 | Dock4     | dedicator of cytokinesis 4                                                   |
| TC15000017 | 0.001497 | -1.81893 | RHEB_cKO down vs WT | -0.86309 -3σ | 15 D3 15    | 78725  | 78725  | D730001G  | RIKEN cDNA D730001G18 gene                                                   |
| TC19000010 | 0.00803  | -1.81926 | RHEB_cKO down vs WT | -0.86335 -3σ | 19 A 19     | 56072  | 56072  | Lgals12   | lectin, galactose binding, soluble 12                                        |
| TC14000017 | 0.03209  | -1.82108 | RHEB_cKO down vs WT | -0.86479 -3σ | 14 B 14     | 26419  | 26419  | Mapk8     | mitogen-activated protein kinase 8                                           |
| TC01000001 | 0.125533 | -1.82364 | RHEB_cKO down vs WT | -0.86682 -3σ | 1 1 A5      | 74229  | 74229  | Paqr8     | progesterin and adipoQ receptor family member VIII                           |
| TC02000016 | 0.050212 | -1.82407 | RHEB_cKO down vs WT | -0.86717 -3σ | ---         | ---    | ---    | Gm13929   | predicted gene 13929                                                         |
| TC08000011 | 0.0664   | -1.82655 | RHEB_cKO down vs WT | -0.86912 -3σ | 8 D3 8      | 72361  | 72361  | Ces2g     | carboxylesterase 2G                                                          |
| TC06000015 | 0.024528 | -1.82718 | RHEB_cKO down vs WT | -0.86962 -3σ | 6 A3.3 6 1  | 22214  | 22214  | Ube2h     | ubiquitin-conjugating enzyme E2H                                             |
| TC10000005 | 0.001011 | -1.82789 | RHEB_cKO down vs WT | -0.87018 -3σ | 10 B4 10    | 216001 | 216001 | Micu1     | mitochondrial calcium uptake 1                                               |
| TC18000013 | 0.155183 | -1.82978 | RHEB_cKO down vs WT | -0.87167 -3σ | 18 D2 18    | 320253 | 320253 | March3    | membrane-associated ring finger (C3HC4) 3                                    |
| TC14000015 | 0.125357 | -1.83018 | RHEB_cKO down vs WT | -0.87199 -3σ | 14 C1 14    | 114874 | 114874 | Ddhd1     | DDHD domain containing 1                                                     |
| TC09000026 | 0.00414  | -1.83087 | RHEB_cKO down vs WT | -0.87253 -3σ | 9 D 9       | 546143 | 546143 | Ccp10s    | cell cycle progression 1, opposite strand                                    |
| TC07000016 | 0.180234 | -1.83134 | RHEB_cKO down vs WT | -0.8729 -3σ  | 7 F1 7 57.  | 11535  | 11535  | Adm       | adrenomedullin                                                               |
| TC03000026 | 0.001522 | -1.83169 | RHEB_cKO down vs WT | -0.87317 -3σ | 3 F2.2 3    | 242125 | 242125 | Mab21l3   | mab-21-like 3 (C. elegans)                                                   |
| TC04000011 | 0.006167 | -1.83276 | RHEB_cKO down vs WT | -0.87402 -3σ | ---         | ---    | ---    | Gm12727   | predicted gene 12727                                                         |
| TC18000001 | 0.04451  | -1.83286 | RHEB_cKO down vs WT | -0.8741 -3σ  | 18 A2 18    | 67664  | 67664  | Rnf125    | ring finger protein 125                                                      |
| TC0X000015 | 0.007521 | -1.83553 | RHEB_cKO down vs WT | -0.8762 -3σ  | X F3 X      | 54609  | 54609  | Ubqln2    | ubiquilin 2                                                                  |
| TC01000008 | 0.004679 | -1.83653 | RHEB_cKO down vs WT | -0.87698 -3σ | 1 D 1       | 22236  | 22236  | Ugt1a2    | UDP glucuronosyltransferase 1 family, polypeptide A2                         |
| TC09000012 | 0.0202   | -1.8374  | RHEB_cKO down vs WT | -0.87766 -3σ | 9 9         | 319707 | 319707 | C430002N  | RIKEN cDNA C430002N11 gene                                                   |
| TC02000017 | 0.013852 | -1.83842 | RHEB_cKO down vs WT | -0.87846 -3σ | 2 E4-E5 2   | 56357  | 56357  | Ivd       | isovaleryl coenzyme A dehydrogenase                                          |
| TC0X000025 | 0.048956 | -1.83906 | RHEB_cKO down vs WT | -0.87897 -3σ | ---         | ---    | ---    | Gm8876    | predicted gene 8876                                                          |
| TC01000033 | 0.028419 | -1.83977 | RHEB_cKO down vs WT | -0.87953 -3σ | 1 G3 1 67.  | 20652  | 20652  | Soat1     | sterol O-acyltransferase 1                                                   |
| TC13000022 | 0.058674 | -1.84013 | RHEB_cKO down vs WT | -0.87981 -3σ | 13 B3 13    | 66631  | 66631  | Mfsd14b   | major facilitator superfamily domain containing 14B                          |
| TC04000038 | 0.081645 | -1.84055 | RHEB_cKO down vs WT | -0.88014 -3σ | 4 D3 4      | 26971  | 26971  | Pla2g2f   | phospholipase A2, group IIF                                                  |
| TC11000037 | 0.032317 | -1.84119 | RHEB_cKO down vs WT | -0.88064 -3σ | ---         | ---    | ---    | Gm14180   | predicted gene 14180                                                         |
| TC13000006 | 0.014701 | -1.84121 | RHEB_cKO down vs WT | -0.88065 -3σ | ---         | 1E+08  | 1E+08  | Gm10782   | predicted gene 10782                                                         |
| TC10000017 | 0.00299  | -1.84193 | RHEB_cKO down vs WT | -0.88122 -3σ | 10 10 A     | 56535  | 56535  | Pex3      | peroxisomal biogenesis factor 3                                              |
| TC18000011 | 0.049579 | -1.84216 | RHEB_cKO down vs WT | -0.88124 -3σ | 18 B1 18 1  | 170459 | 170459 | Stard4    | StAR-related lipid transfer (START) domain containing 4                      |
| TC04000033 | 0.01986  | -1.84221 | RHEB_cKO down vs WT | -0.88143 -3σ | 4 D2.1 4    | 68625  | 68625  | Cfap57    | cilia and flagella associated protein 57                                     |
| TC07000042 | 0.045822 | -1.8426  | RHEB_cKO down vs WT | -0.88174 -3σ | 7 F2 7 65.  | 12585  | 12585  | Cdr2      | cerebellar degeneration-related 2                                            |
| TC15000017 | 0.049797 | -1.84478 | RHEB_cKO down vs WT | -0.88345 -3σ | 15 D3 15    | 223645 | 223645 | Mroh6     | maestro heat-like repeat family member 6                                     |
| TC02000017 | 0.046522 | -1.84489 | RHEB_cKO down vs WT | -0.88354 -3σ | 2 E5 2      | 69065  | 69065  | Chac1     | ChaC, cation transport regulator 1                                           |
| TC12000007 | 0.003375 | -1.84514 | RHEB_cKO down vs WT | -0.88373 -3σ | 12 D1 12 3  | 26897  | 26897  | Acot1     | acyl-CoA thioesterase 1                                                      |
| TC03000024 | 0.129188 | -1.84627 | RHEB_cKO down vs WT | -0.88462 -3σ | 3 F1 3      | 631101 | 631101 | Lce1k     | late cornified envelope 1K                                                   |
| TC01000003 | 0.381647 | -1.84677 | RHEB_cKO down vs WT | -0.885 -3σ   | 1 C1.1 1 2  | 12825  | 12825  | Col3a1    | collagen, type III, alpha 1                                                  |
| TC15000015 | 0.003338 | -1.84936 | RHEB_cKO down vs WT | -0.88703 -3σ | 15 E2 15    | 223739 | 223739 | 5031439G  | RIKEN cDNA 5031439G07 gene                                                   |
| TC12000015 | 0.042773 | -1.85135 | RHEB_cKO down vs WT | -0.88858 -3σ | 12 C3 12    | 81535  | 81535  | Sgpp1     | sphingosine-1-phosphate phosphatase 1                                        |
| TC05000005 | 0.112635 | -1.85153 | RHEB_cKO down vs WT | -0.88872 -3σ | 5 C1 5 27.  | 20657  | 20657  | Sod3      | superoxide dismutase 3, extracellular                                        |
| TC08000013 | 0.04642  | -1.85252 | RHEB_cKO down vs WT | -0.88949 -3σ | 8 E1 8      | 93739  | 93739  | Gabarapl2 | gamma-aminobutyric acid (GABA) A receptor-associated protein-like 2          |
| TC03000005 | 0.006614 | -1.85252 | RHEB_cKO down vs WT | -0.88949 -3σ | 3 F2.1 3    | 213121 | 213121 | Ankrd35   | ankyrin repeat domain 35                                                     |
| TSUnmappe  | 0.013063 | -1.85311 | RHEB_cKO down vs WT | -0.88995 -3σ | 5 G2 5 76.  | 11423  | 11423  | Ache      | acetylcholinesterase                                                         |
| TC03000024 | 0.191658 | -1.85436 | RHEB_cKO down vs WT | -0.89092 -3σ | 3 F1 3      | 67828  | 67828  | Lce1f     | late cornified envelope 1F                                                   |
| TC0X000028 | 0.250034 | -1.85598 | RHEB_cKO down vs WT | -0.89218 -3σ | X X A2-A3   | 16431  | 16431  | Itm2a     | integral membrane protein 2A                                                 |
| TC03000013 | 0.050635 | -1.85686 | RHEB_cKO down vs WT | -0.89287 -3σ | 3 G3 3      | 170439 | 170439 | Elov6     | ELOVL family member 6, elongation of long chain fatty acids (yeast)          |
| TC08000025 | 0.088113 | -1.85696 | RHEB_cKO down vs WT | -0.89294 -3σ | 8 C3 8 38.  | 74841  | 74841  | Usp38     | ubiquitin specific peptidase 38                                              |
| TC06000012 | 0.05326  | -1.85878 | RHEB_cKO down vs WT | -0.89435 -3σ | ---         | ---    | ---    | Gm17482   | predicted gene, 17482                                                        |
| TC04000000 | 0.040076 | -1.86072 | RHEB_cKO down vs WT | -0.89586 -3σ | 4 4 A1-A2   | 60599  | 60599  | Trp53inp1 | transformation related protein 53 inducible nuclear protein 1                |
| TC14000021 | 0.000206 | -1.86088 | RHEB_cKO down vs WT | -0.89598 -3σ | 14 C2 14    | 68514  | 68514  | Micu2     | mitochondrial calcium uptake 2                                               |
| TC08000015 | 0.024812 | -1.86171 | RHEB_cKO down vs WT | -0.89663 -3σ | 8 A2 8      | 83436  | 83436  | Plekha2   | pleckstrin homology domain-containing, family A (phosphoinositide binding s  |
| TC08000027 | 0.378863 | -1.86278 | RHEB_cKO down vs WT | -0.89746 -3σ | 8 D2 8 50.  | 12552  | 12552  | Cdh11     | cadherin 11                                                                  |
| TC11000015 | 0.005985 | -1.86325 | RHEB_cKO down vs WT | -0.89783 -3σ | 11 E2 11    | 20698  | 20698  | Sphk1     | sphingosine kinase 1                                                         |
| TC02000037 | 0.006474 | -1.86336 | RHEB_cKO down vs WT | -0.8979 -3σ  | ---         | ---    | ---    | Gm13652   | predicted gene 13652                                                         |
| TC07000014 | 0.000767 | -1.86338 | RHEB_cKO down vs WT | -0.89792 -3σ | 7 7 F1      | 69710  | 69710  | Arap1     | ArfGAP with RhoGAP domain, ankyrin repeat and PH domain 1                    |
| TC15000022 | 0.188083 | -1.8642  | RHEB_cKO down vs WT | -0.89855 -3σ | 15 F3 15    | 332131 | 332131 | Krt78     | keratin 78                                                                   |
| TC11000021 | 0.002088 | -1.86491 | RHEB_cKO down vs WT | -0.89911 -3σ | 11 A1 11 2  | 21452  | 21452  | Tcn2      | transcobalamin 2                                                             |
| TC07000005 | 0.001474 | -1.8662  | RHEB_cKO down vs WT | -0.9001 -3σ  | 7 B1 7      | 68458  | 68458  | Ppp1r14a  | protein phosphatase 1, regulatory (inhibitor) subunit 14A                    |
| TC01000018 | 0.234517 | -1.8664  | RHEB_cKO down vs WT | -0.90026 -3σ | 1 H6 1 98.  | 12490  | 12490  | Cd34      | CD34 antigen                                                                 |
| TC14000007 | 0.005849 | -1.86755 | RHEB_cKO down vs WT | -0.90115 -3σ | 14 C3 14    | 277154 | 277154 | Nynrin    | NYN domain and retroviral integrase containing                               |
| TC11000004 | 0.00282  | -1.87038 | RHEB_cKO down vs WT | -0.90333 -3σ | 11 A5-B1.1  | 11492  | 11492  | Adam19    | a disintegrin and metalloproteinase domain 19 (meltrin beta)                 |
| TC04000013 | 0.090559 | -1.87406 | RHEB_cKO down vs WT | -0.90617 -3σ | ---         | ---    | ---    | Gm12892   | predicted gene 12892                                                         |
| TC07000018 | 0.13851  | -1.87549 | RHEB_cKO down vs WT | -0.90727 -3σ | 7 7 F4      | 68616  | 68616  | Gdpd3     | glycerophosphodiester phosphodiesterase domain containing 3                  |
| TC07000028 | 0.061757 | -1.87596 | RHEB_cKO down vs WT | -0.90763 -3σ | 7 B2 7      | 243923 | 243923 | Rgs9bp    | regulator of G-protein signalling 9 binding protein                          |
| TC10000008 | 0.06995  | -1.8769  | RHEB_cKO down vs WT | -0.90835 -3σ | 10 C1 10    | 67112  | 67112  | Fgf22     | fibroblast growth factor 22                                                  |
| TC12000007 | 0.012321 | -1.87748 | RHEB_cKO down vs WT | -0.90888 -3σ | 12 C3 12    | 11847  | 11847  | Arg2      | arginase type II                                                             |
| TC07000030 | 0.013832 | -1.87847 | RHEB_cKO down vs WT | -0.90956 -3σ | 7 B4 7 29.  | 14344  | 14344  | Fut2      | fucosyltransferase 2                                                         |
| TC01000004 | 0.025196 | -1.87988 | RHEB_cKO down vs WT | -0.91064 -3σ | 1 C 1 30.5  | 12477  | 12477  | Ctla4     | cytotoxic T-lymphocyte-associated protein 4                                  |
| TC08000025 | 0.041851 | -1.88097 | RHEB_cKO down vs WT | -0.91147 -3σ | 8 C2 8 39.  | 16168  | 16168  | Il15      | interleukin 15                                                               |

|            |          |          |                     |              |             |          |          |          |                                                                                |
|------------|----------|----------|---------------------|--------------|-------------|----------|----------|----------|--------------------------------------------------------------------------------|
| TC14000005 | 0.002216 | -1.88363 | RHEB_cKO down vs WT | -0.91352 -3σ | 14 D2 14    | 105653   | 105653   | Phyhip   | phytanoyl-CoA hydroxylase interacting protein                                  |
| TC14000015 | 0.077797 | -1.88434 | RHEB_cKO down vs WT | -0.91406 -3σ | 14 A3 14    | 78787    | 78787    | Usp54    | ubiquitin specific peptidase 54                                                |
| TC03000022 | 0.046811 | -1.88445 | RHEB_cKO down vs WT | -0.91415 -3σ | 3 E3 3      | 24088    | 24088    | Tlr2     | toll-like receptor 2                                                           |
| TC05000015 | 0.068192 | -1.88701 | RHEB_cKO down vs WT | -0.9161 -3σ  | 5 G2 5 75.  | 15507    | 15507    | Hspb1    | heat shock protein 1                                                           |
| TC09000001 | 0.018986 | -1.88715 | RHEB_cKO down vs WT | -0.91621 -3σ | 9 9 A3      | 69137    | 69137    | Vstm5    | V-set and transmembrane domain containing 5                                    |
| TC07000016 | 0.077815 | -1.88756 | RHEB_cKO down vs WT | -0.91652 -3σ | 7 E2-E3 7   | 11717    | 11717    | Ampd3    | adenosine monophosphate deaminase 3                                            |
| TC19000007 | 0.000381 | -1.88787 | RHEB_cKO down vs WT | -0.91676 -3σ | 19 D2 19 4  | 27360    | 27360    | Add3     | adducin 3 (gamma)                                                              |
| TC18000004 | 0.003685 | -1.88976 | RHEB_cKO down vs WT | -0.9182 -3σ  | 18 B3 18    | 269016   | 269016   | Sh3rf2   | SH3 domain containing ring finger 2                                            |
| TC11000011 | 0.025197 | -1.89409 | RHEB_cKO down vs WT | -0.92151 -3σ | 11 B5 11 4  | 11676    | 11676    | Aldoc    | aldolase C, fructose-bisphosphate                                              |
| TC07000043 | 0.226137 | -1.89556 | RHEB_cKO down vs WT | -0.92262 -3σ | 7 F3 7 69.1 | 76560    | 76560    | Prss8    | protease, serine 8 (prostasin)                                                 |
| TC11000031 | 0.038917 | -1.89572 | RHEB_cKO down vs WT | -0.92275 -3σ | 11 B4 11    | 83429    | 83429    | Ctns     | cystinosis, nephropathic                                                       |
| TC04000037 | 0.036173 | -1.89806 | RHEB_cKO down vs WT | -0.92453 -3σ | 4 D3 4 69.  | 12260    | 12260    | C1qb     | complement component 1, q subcomponent, beta polypeptide                       |
| TC17000028 | 0.003578 | -1.89909 | RHEB_cKO down vs WT | -0.92531 -3σ | 17 B1 17 1  | 15039    | 15039    | H2-T22   | histocompatibility 2, T region locus 22                                        |
| TC16000011 | 0.058934 | -1.90059 | RHEB_cKO down vs WT | -0.92645 -3σ | 16 A1 16    | 239691   | 239691   | AU021092 | expressed sequence AU021092                                                    |
| TC03000021 | 0.092271 | -1.90093 | RHEB_cKO down vs WT | -0.92671 -3σ | ---         | ---      | ---      | Gm20689  | predicted gene 20689                                                           |
| TC10000022 | 0.005395 | -1.9034  | RHEB_cKO down vs WT | -0.92858 -3σ | 10 B4 10    | 237360   | 237360   | Adamts14 | a disintegrin-like and metalloproteinase (reprolysin type) with thrombospondin |
| TC04000010 | 0.030741 | -1.90423 | RHEB_cKO down vs WT | -0.92921 -3σ | 4 C6 4 45.  | 26563    | 26563    | Ror1     | receptor tyrosine kinase-like orphan receptor 1                                |
| TC0X000016 | 0.061967 | -1.90442 | RHEB_cKO down vs WT | -0.92935 -3σ | X F5 X 76.  | 70008    | 70008    | Ace2     | angiotensin I converting enzyme (peptidyl-dipeptidase A) 2                     |
| TC03000011 | 0.018725 | -1.90485 | RHEB_cKO down vs WT | -0.92967 -3σ | 3 F3 3      | 20661    | 20661    | Sort1    | sortilin 1                                                                     |
| TC19000000 | 0.111528 | -1.90669 | RHEB_cKO down vs WT | -0.93107 -3σ | 19 A 19     | 73458    | 73458    | Aldh3b3  | aldehyde dehydrogenase 3 family, member B3                                     |
| TC12000020 | 0.004464 | -1.90704 | RHEB_cKO down vs WT | -0.93134 -3σ | 12 D1 12 2  | 104776   | 104776   | Alhd6a1  | aldehyde dehydrogenase family 6, subfamily A1                                  |
| TC19000006 | 0.036429 | -1.9072  | RHEB_cKO down vs WT | -0.93146 -3σ | 19 C3 19 3  | 20249    | 20249    | Scd1     | stearoyl-Coenzyme A desaturase 1                                               |
| TC13000001 | 0.109686 | -1.90984 | RHEB_cKO down vs WT | -0.93345 -3σ | ---         | ---      | ---      | Tcrg-C3  | T cell receptor gamma, constant 3                                              |
| TC03000023 | 0.000532 | -1.91063 | RHEB_cKO down vs WT | -0.93405 -3σ | 3 F1 3      | 20615    | 20615    | Snapin   | SNAP-associated protein                                                        |
| TC11000037 | 0.34516  | -1.91338 | RHEB_cKO down vs WT | -0.93612 -3σ | 11 D 11     | 107656   | 107656   | Krt9     | keratin 9                                                                      |
| TC03000022 | 0.108717 | -1.9139  | RHEB_cKO down vs WT | -0.93652 -3σ | 3 F1 3      | 229474   | 229474   | Fhdc1    | FH2 domain containing 1                                                        |
| TC04000035 | 0.010925 | -1.91583 | RHEB_cKO down vs WT | -0.93797 -3σ | 4 D2.2 4    | 76850    | 76850    | Ago4     | argonaute RISC catalytic subunit 4                                             |
| TC16000003 | 0.094261 | -1.91657 | RHEB_cKO down vs WT | -0.93853 -3σ | 16 B1 16    | 71338    | 71338    | Tprg     | transformation related protein 63 regulated                                    |
| TC07000015 | 0.156152 | -1.91674 | RHEB_cKO down vs WT | -0.93865 -3σ | 7 E3 7 55.1 | 20597    | 20597    | Smpd1    | sphingomyelin phosphodiesterase 1, acid lysosomal                              |
| TC16000021 | 0.079922 | -1.91683 | RHEB_cKO down vs WT | -0.93872 -3σ | 16 A1 16 5  | 58239    | 58239    | Dexi     | dexamethasone-induced transcript                                               |
| TC01000022 | 0.047599 | -1.91691 | RHEB_cKO down vs WT | -0.93878 -3σ | 1 B 1       | 1E+08    | 1E+08    | Gm16894  | predicted gene, 16894                                                          |
| TC03000002 | 0.255087 | -1.91949 | RHEB_cKO down vs WT | -0.94073 -3σ | 3 B 3       | 329628   | 329628   | Fat4     | FAT atypical cadherin 4                                                        |
| TC14000005 | 0.009349 | -1.92018 | RHEB_cKO down vs WT | -0.94124 -3σ | 14 14 C3    | 20680    | 20680    | Sox7     | SRY (sex determining region Y)-box 7                                           |
| TC04000038 | 0.010976 | -1.92263 | RHEB_cKO down vs WT | -0.94308 -3σ | 4 D3 4 70.  | 18784    | 18784    | Pla2g5   | phospholipase A2, group V                                                      |
| TC15000011 | 0.01957  | -1.9235  | RHEB_cKO down vs WT | -0.94373 -3σ | 15 A2 15 3  | 20512    | 20512    | Slc1a3   | solute carrier family 1 (glial high affinity glutamate transporter), member 3  |
| TC04000021 | 0.002642 | -1.92533 | RHEB_cKO down vs WT | -0.9451 -3σ  | 4 A1 4 2.3  | 18619    | 18619    | Penk     | preproenkephalin                                                               |
| TC19000000 | 0.242554 | -1.92838 | RHEB_cKO down vs WT | -0.94739 -3σ | 19 A 19     | 70445    | 70445    | Cd248    | CD248 antigen, endosialin                                                      |
| TC09000027 | 0.057963 | -1.92908 | RHEB_cKO down vs WT | -0.94791 -3σ | 9 E3.1 9 4  | 17436    | 17436    | Me1      | malic enzyme 1, NADP(+)-dependent, cytosolic                                   |
| TC05000020 | 0.159663 | -1.93075 | RHEB_cKO down vs WT | -0.94916 -3σ | 5 A3 5 11.  | 213948   | 213948   | Atg9b    | autophagy related 9B                                                           |
| TC11000016 | 0.065157 | -1.93129 | RHEB_cKO down vs WT | -0.94957 -3σ | 11 D 11 6:  | 14459    | 14459    | Gast     | gastrin                                                                        |
| TC11000011 | 0.044913 | -1.93204 | RHEB_cKO down vs WT | -0.95013 -3σ | 11 B5 11 4  | 52466    | 52466    | Slc46a1  | solute carrier family 46, member 1                                             |
| TC17000016 | 0.009608 | -1.93271 | RHEB_cKO down vs WT | -0.95063 -3σ | 17 B1 17 1  | 26378    | 26378    | Decr2    | 2-4-dienoyl-Coenzyme A reductase 2, peroxisomal                                |
| TC04000015 | 0.124284 | -1.93324 | RHEB_cKO down vs WT | -0.95102 -3σ | ---         | ---      | ---      | Gm12968  | predicted gene 12968                                                           |
| TC07000035 | 0.003023 | -1.93362 | RHEB_cKO down vs WT | -0.9513 -3σ  | 7 D3 7      | 16790    | 16790    | Anpep    | alanyl (membrane) aminopeptidase                                               |
| TC02000003 | 0.044125 | -1.93461 | RHEB_cKO down vs WT | -0.95205 -3σ | 2 A3 2 16.  | 215274   | 215274   | Il1f10   | interleukin 1 family, member 10                                                |
| TC17000017 | 0.081796 | -1.93536 | RHEB_cKO down vs WT | -0.9526 -3σ  | 17 A3.3 17  | 20815    | 20815    | Srpk1    | serine/arginine-rich protein specific kinase 1                                 |
| TC18000013 | 0.368043 | -1.93696 | RHEB_cKO down vs WT | -0.95379 -3σ | 18 D1 18 2  | 16948    | 16948    | Lox      | lysyl oxidase                                                                  |
| TC01000012 | 0.208739 | -1.93969 | RHEB_cKO down vs WT | -0.95583 -3σ | 1 E4 1      | 71884    | 71884    | Chit1    | chitinase 1 (chitotriosidase)                                                  |
| TC09000024 | 0.040241 | -1.93996 | RHEB_cKO down vs WT | -0.95603 -3σ | 9 9 C       | 74090    | 74090    | Pqr5     | progesterone and adipoQ receptor family member V                               |
| TC01000005 | 0.116856 | -1.94424 | RHEB_cKO down vs WT | -0.9592 -3σ  | 1 C3 1 33.  | 17756    | 17756    | Map2     | microtubule-associated protein 2                                               |
| TC09000023 | 0.031197 | -1.94496 | RHEB_cKO down vs WT | -0.95974 -3σ | 9 B 9       | 244895   | 244895   | Peak1    | pseudopodium-enriched atypical kinase 1                                        |
| TC08000011 | 0.017444 | -1.94622 | RHEB_cKO down vs WT | -0.96067 -3σ | 8 D1 8      | 244608   | 244608   | Ccdc113  | coiled-coil domain containing 113                                              |
| TC01000023 | 0.070676 | -1.94704 | RHEB_cKO down vs WT | -0.96128 -3σ | 1 C1.1 1 2  | 17912    | 17912    | Myo1b    | myosin IB                                                                      |
| TC16000013 | 0.133393 | -1.94828 | RHEB_cKO down vs WT | -0.9622 -3σ  | 16 B1 16 1  | 239759   | 239759   | Liph     | lipase, member H                                                               |
| TC09000011 | 0.0354   | -1.94929 | RHEB_cKO down vs WT | -0.96295 -3σ | ---         | ---      | ---      | Gm11114  | predicted gene 11114                                                           |
| TC15000015 | 0.388398 | -1.95058 | RHEB_cKO down vs WT | -0.9639 -3σ  | 15 15 D2    | 18606    | 18606    | Enpp2    | ectonucleotide pyrophosphatase/phosphodiesterase 2                             |
| TC10000026 | 0.173615 | -1.95256 | RHEB_cKO down vs WT | -0.96537 -3σ | 10 C1 10    | 270757   | 270757   | Bpifc    | BPI fold containing family C                                                   |
| TC03000004 | 0.008842 | -1.95362 | RHEB_cKO down vs WT | -0.96615 -3σ | 3 D 3       | 676914   | 676914   | Gm9696   | arylacetamide deacetylase-like 2 pseudogene                                    |
| TC16000007 | 0.015546 | -1.95839 | RHEB_cKO down vs WT | -0.96967 -3σ | 16 C1.1 16  | 320712   | 320712   | Abi3bp   | ABI gene family, member 3 (NESH) binding protein                               |
| TC03000015 | 0.062599 | -1.95875 | RHEB_cKO down vs WT | -0.96993 -3σ | 3 C 3 26.6  | 26422    | 26422    | Nbea     | neurobeachin                                                                   |
| TC09000023 | 0.027281 | -1.96205 | RHEB_cKO down vs WT | -0.97236 -3σ | 9 A5.3 9    | 94180    | 94180    | Acsbg1   | acyl-CoA synthetase bubblegum family member 1                                  |
| TC0X000028 | 0.074399 | -1.96621 | RHEB_cKO down vs WT | -0.97542 -3σ | X E1 X      | 67071    | 67071    | Rps6ka6  | ribosomal protein S6 kinase polypeptide 6                                      |
| TC19000014 | 0.155037 | -1.96839 | RHEB_cKO down vs WT | -0.97702 -3σ | 19 C3 19 3  | 17060    | 17060    | Blnk     | B cell linker                                                                  |
| TC01000006 | 0.005426 | -1.96857 | RHEB_cKO down vs WT | -0.97715 -3σ | 1 1 C2      | 56695    | 56695    | Pnkd     | paroxysmal nonkinesinogenic dyskinesia                                         |
| TC06000015 | 0.000496 | -1.9723  | RHEB_cKO down vs WT | -0.97988 -3σ | 6 A3 6      | 30785    | 30785    | Ctnnbp2  | cortactin binding protein 2                                                    |
| TC04000026 | 0.126771 | -1.9733  | RHEB_cKO down vs WT | -0.98061 -3σ | ---         | ---      | ---      | 2310081O | RIKEN cDNA 2310081O03 gene                                                     |
| TC15000005 | 0.033935 | -1.97412 | RHEB_cKO down vs WT | -0.98121 -3σ | ---         | ---      | ---      | Gm26760  | predicted gene, 26760                                                          |
| TC13000018 | 0.004548 | -1.97544 | RHEB_cKO down vs WT | -0.98217 -3σ | 13 A4 13    | 109254   | 109254   | Adtrp    | androgen dependent TFPI regulating protein                                     |
| TC03000012 | 0.071713 | -1.97661 | RHEB_cKO down vs WT | -0.98303 -3σ | 3 G1 3      | 214137   | 214137   | Arhgap29 | Rho GTPase activating protein 29                                               |
| TC14000005 | 0.008584 | -1.97754 | RHEB_cKO down vs WT | -0.98371 -3σ | 14 D1 14 3  | 12759    | 12759    | Clu      | clusterin                                                                      |
| TC0X000026 | 0.011101 | -1.97838 | RHEB_cKO down vs WT | -0.98432 -3σ | X X C2      | 94190    | 94190    | Ophn1    | oligophrenin 1                                                                 |
| TSUnmappe  | 0.119818 | -1.97839 | RHEB_cKO down vs WT | -0.98433 -3σ | 9 C 9 37.4  | 19883    | 19883    | Rora     | RAR-related orphan receptor alpha                                              |
| TC01000015 | 0.070154 | -1.97892 | RHEB_cKO down vs WT | -0.98471 -3σ | 1 1 H1      | 74895    | 74895    | Ccdc181  | coiled-coil domain containing 181                                              |
| TC03000015 | 0.086551 | -1.97898 | RHEB_cKO down vs WT | -0.98476 -3σ | ---         | ---      | ---      | Gm21954  | predicted gene, 21954                                                          |
| TC17000016 | 0.013766 | -1.97961 | RHEB_cKO down vs WT | -0.98522 -3σ | 17 A3.3 17  | 224617   | 224617   | Tbc1d24  | TBC1 domain family, member 24                                                  |
| TC11000036 | 0.007547 | -1.97964 | RHEB_cKO down vs WT | -0.98524 -3σ | 11 D 11     | 56013    | 56013    | Srcin1   | SRC kinase signaling inhibitor 1                                               |
| TC04000018 | 0.01095  | -1.9797  | RHEB_cKO down vs WT | -0.98528 -3σ | 4 E1 4      | 20148    | 20148    | Dhrs3    | dehydrogenase/reductase (SDR family) member 3                                  |
| TC03000000 | 0.064547 | -1.9837  | RHEB_cKO down vs WT | -0.9882 -3σ  | 3 A1 3      | 66371    | 66371    | Chmp4c   | charged multivesicular body protein 4C                                         |
| TC0X000006 | 0.20142  | -1.98458 | RHEB_cKO down vs WT | -0.98883 -3σ | X B X 37.3  | 12111    | 12111    | Bgn      | biglycan                                                                       |
| TC13000021 | 0.001797 | -1.98542 | RHEB_cKO down vs WT | -0.98944 -3σ | 13 B3 13    | 218294   | 218294   | Cdc14b   | CDC14 cell division cycle 14B                                                  |
| TC14000017 | 0.044778 | -1.98753 | RHEB_cKO down vs WT | -0.99098 -3σ | 14 B 14     | 69134    | 69134    | Fam25c   | family with sequence similarity 25, member C                                   |
| TC04000001 | 0.030975 | -1.98921 | RHEB_cKO down vs WT | -0.9922 -3σ  | 4 A3 4 7.7  | 50500    | 50500    | Ttpa     | tocopherol (alpha) transfer protein                                            |
| TC06000000 | 0.324454 | -1.99445 | RHEB_cKO down vs WT | -0.99599 -3σ | 6 A1 6 1.8  | 12843    | 12843    | Col1a2   | collagen, type I, alpha 2                                                      |
| TC08000005 | 0.312152 | -1.99567 | RHEB_cKO down vs WT | -0.99687 -3σ | 8 B1.1 8    | 53318    | 53318    | Pdlim3   | PDZ and LIM domain 3                                                           |
| TC04000034 | 0.017497 | -1.99602 | RHEB_cKO down vs WT | -0.99713 -3σ | ---         | 1.02E+08 | 1.02E+08 | Mir7015  | microRNA 7015                                                                  |
| TC08000025 | 0.004355 | -1.9963  | RHEB_cKO down vs WT | -0.99733 -3σ | 8 E1 8      | 234740   | 234740   | Tmem231  | transmembrane protein 231                                                      |
| TC15000021 | 0.003125 | -1.99753 | RHEB_cKO down vs WT | -0.99822 -3σ | 15 F1 15 5  | 74775    | 74775    | Lmbr1l   | limb region 1 like                                                             |
| TC01000015 | 0.122419 | -1.99805 | RHEB_cKO down vs WT | -0.99859 -3σ | 1 H2.2 1 7  | 116914   | 116914   | Slc19a2  | solute carrier family 19 (thiamine transporter), member 2                      |
| TC08000027 | 0.105779 | -1.99861 | RHEB_cKO down vs WT | -0.999 -3σ   | 8 D1 8 47.  | 13000    | 13000    | Csnk2a2  | casein kinase 2, alpha prime polypeptide                                       |

|            |          |          |                     |              |             |          |          |           |                                                                        |
|------------|----------|----------|---------------------|--------------|-------------|----------|----------|-----------|------------------------------------------------------------------------|
| TC02000003 | 0.164754 | -1.99934 | RHEB_cKO down vs WT | -0.99952 -3σ | 2 A3 2 16.  | 54450    | 54450    | Il1f5     | interleukin 1 family, member 5 (delta)                                 |
| TC13000003 | 0.027977 | -2.00352 | RHEB_cKO down vs WT | -1.00254 -3σ | 13 A3.3 1:  | 20706    | 20706    | Serpib9b  | serine (or cysteine) peptidase inhibitor, clade B, member 9b           |
| TC12000021 | 0.000848 | -2.00369 | RHEB_cKO down vs WT | -1.00266 -3σ | 12 12 F1    | 24000    | 24000    | Ptpn21    | protein tyrosine phosphatase, non-receptor type 21                     |
| TC06000004 | 0.01843  | -2.0068  | RHEB_cKO down vs WT | -1.0049 -3σ  | 6 B2.1 6    | 54324    | 54324    | Arhgef5   | Rho guanine nucleotide exchange factor (GEF) 5                         |
| TC02000043 | 0.010018 | -2.00693 | RHEB_cKO down vs WT | -1.00499 -3σ | 2 E5 2 59.  | 19419    | 19419    | Rasgrp1   | RAS guanyl releasing protein 1                                         |
| TC07000038 | 0.00906  | -2.01047 | RHEB_cKO down vs WT | -1.00753 -3σ | 7 F1 7      | 50877    | 50877    | Neu3      | neuraminidase 3                                                        |
| TC08000005 | 0.00479  | -2.01568 | RHEB_cKO down vs WT | -1.01127 -3σ | 8 8 B2      | 14081    | 14081    | Acsl1     | acyl-CoA synthetase long-chain family member 1                         |
| TC05000036 | 0.004421 | -2.01782 | RHEB_cKO down vs WT | -1.0128 -3σ  | 5 G3 5      | 71706    | 71706    | Slc46a3   | solute carrier family 46, member 3                                     |
| TC01000005 | 0.01915  | -2.02008 | RHEB_cKO down vs WT | -1.01441 -3σ | 1 D 1       | 208777   | 208777   | Sned1     | sushi, nidogen and EGF-like domains 1                                  |
| TC07000017 | 0.009609 | -2.02097 | RHEB_cKO down vs WT | -1.01505 -3σ | 7 F3 7      | 30949    | 30949    | Lcmt1     | leucine carboxyl methyltransferase 1                                   |
| TC01000010 | 0.132848 | -2.02317 | RHEB_cKO down vs WT | -1.01662 -3σ | 1 1 D       | 20725    | 20725    | Serpib8   | serine (or cysteine) peptidase inhibitor, clade B, member 8            |
| TC04000036 | 0.00472  | -2.02366 | RHEB_cKO down vs WT | -1.01696 -3σ | 4 D2.3 4    | 269589   | 269589   | Sytl1     | synaptotagmin-like 1                                                   |
| TC08000024 | 0.106495 | -2.025   | RHEB_cKO down vs WT | -1.01792 -3σ | 8 B3.3 8    | 74015    | 74015    | Fcho1     | FCH domain only 1                                                      |
| TC01000012 | 0.033778 | -2.02988 | RHEB_cKO down vs WT | -1.0214 -3σ  | 1 E4 1 59.  | 21956    | 21956    | Tnnt2     | troponin T2, cardiac                                                   |
| TC01000008 | 0.117409 | -2.0311  | RHEB_cKO down vs WT | -1.02226 -3σ | ---         | ---      | ---      | Gm15374   | predicted gene 15374                                                   |
| TC15000003 | 0.171427 | -2.0313  | RHEB_cKO down vs WT | -1.0224 -3σ  | 15 15 D     | 12818    | 12818    | Col14a1   | collagen, type XIV, alpha 1                                            |
| TC11000038 | 0.011934 | -2.03228 | RHEB_cKO down vs WT | -1.0231 -3σ  | 11 D 11 6:  | 21763    | 21763    | Tex2      | testis expressed gene 2                                                |
| TC0X000003 | 0.006494 | -2.03533 | RHEB_cKO down vs WT | -1.02526 -3σ | X A3.2 X    | 75974    | 75974    | Dock11    | dedicator of cytokinesis 11                                            |
| TC07000007 | 0.028353 | -2.03597 | RHEB_cKO down vs WT | -1.02572 -3σ | ---         | ---      | ---      | Gm2058    | predicted gene 2058                                                    |
| TC04000000 | 0.066135 | -2.03637 | RHEB_cKO down vs WT | -1.026 -3σ   | ---         | ---      | ---      | A830012C  | RIKEN cDNA A830012C17 gene                                             |
| TC01000016 | 0.028538 | -2.0374  | RHEB_cKO down vs WT | -1.02673 -3σ | 1 H4 1      | 226744   | 226744   | Cnst      | consortin, connexin sorting protein                                    |
| TC06000021 | 0.052957 | -2.04135 | RHEB_cKO down vs WT | -1.02952 -3σ | 6 B1 6      | 434008   | 434008   | Tmem178l  | transmembrane protein 178B                                             |
| TC03000024 | 0.046954 | -2.04178 | RHEB_cKO down vs WT | -1.02983 -3σ | 3 3 F2      | 22156    | 22156    | Tuft1     | tuftelin 1                                                             |
| TC11000041 | 0.047099 | -2.04296 | RHEB_cKO down vs WT | -1.03066 -3σ | 11 E2 11 8  | 21858    | 21858    | Timp2     | tissue inhibitor of metalloproteinase 2                                |
| TC04000022 | 0.365014 | -2.04309 | RHEB_cKO down vs WT | -1.03075 -3σ | 4 A1 4      | 208890   | 208890   | Slc26a7   | solute carrier family 26, member 7                                     |
| TC11000005 | 0.08305  | -2.0438  | RHEB_cKO down vs WT | -1.03125 -6σ | 11 B3 11    | 80515    | 80515    | Chd3os    | chromodomain helicase DNA binding protein 3, opposite strand           |
| TC16000008 | 0.01229  | -2.04391 | RHEB_cKO down vs WT | -1.03133 -6σ | 16 16       | 387229   | 387229   | Mir99a    | microRNA 99a                                                           |
| TC10000031 | 0.010635 | -2.04488 | RHEB_cKO down vs WT | -1.03202 -6σ | ---         | ---      | ---      | Gm15900   | predicted gene 15900                                                   |
| TC09000033 | 0.010197 | -2.04896 | RHEB_cKO down vs WT | -1.03489 -6σ | 9 F 9 74.5: | 17281    | 17281    | Fyco1     | FYVE and coiled-coil domain containing 1                               |
| TC15000020 | 0.010743 | -2.05031 | RHEB_cKO down vs WT | -1.03584 -6σ | 15 15 E     | 11883    | 11883    | Arsa      | arylsulfatase A                                                        |
| TC18000013 | 0.000356 | -2.05137 | RHEB_cKO down vs WT | -1.03659 -6σ | 18 C 18     | 20358    | 20358    | Sema6a    | sema domain, transmembrane domain (TM), and cytoplasmic domain, (sema) |
| TC01000025 | 0.235587 | -2.05253 | RHEB_cKO down vs WT | -1.0374 -6σ  | 1 C3 1 36.  | 16011    | 16011    | Igfbp5    | insulin-like growth factor binding protein 5                           |
| TC03000011 | 0.046746 | -2.05631 | RHEB_cKO down vs WT | -1.04005 -6σ | ---         | ---      | ---      | Gm10961   | predicted gene 10961                                                   |
| TC14000023 | 0.041196 | -2.05747 | RHEB_cKO down vs WT | -1.04087 -6σ | 14 D2 14    | 213019   | 213019   | Pdlim2    | PDZ and LIM domain 2                                                   |
| TC19000013 | 0.002651 | -2.05801 | RHEB_cKO down vs WT | -1.04125 -6σ | 19 C1 19 2  | 226090   | 226090   | Ermp1     | endoplasmic reticulum metalloproteinase 1                              |
| TC01000002 | 0.020142 | -2.05872 | RHEB_cKO down vs WT | -1.04174 -6σ | 1 B 1 15.2  | 94220    | 94220    | Cnnm4     | cyclin M4                                                              |
| TC07000007 | 0.129367 | -2.05928 | RHEB_cKO down vs WT | -1.04214 -6σ | 7 B4 7 28.  | 68668    | 68668    | Klk5      | kallikrein related-peptidase 5                                         |
| TC18000008 | 0.000924 | -2.05951 | RHEB_cKO down vs WT | -1.0423 -6σ  | 18 E3 18    | 207259   | 207259   | Zbtb7c    | zinc finger and BTB domain containing 7C                               |
| TC14000010 | 0.006712 | -2.06079 | RHEB_cKO down vs WT | -1.0432 -6σ  | 14 D3 14 :  | 16432    | 16432    | Itn2b     | integral membrane protein 2B                                           |
| TC17000003 | 0.039704 | -2.06187 | RHEB_cKO down vs WT | -1.04395 -6σ | 17 A3.3 1:  | 212733   | 212733   | Ccdc64b   | coiled-coil domain containing 64B                                      |
| TC19000007 | 0.004285 | -2.06248 | RHEB_cKO down vs WT | -1.04438 -6σ | 19 D2 19 4  | 18569    | 18569    | Pdcd4     | programmed cell death 4                                                |
| TC03000000 | 0.067968 | -2.06473 | RHEB_cKO down vs WT | -1.04596 -6σ | 3 F2 13     | 229574   | 229574   | Flg2      | filaggrin family member 2                                              |
| TC05000023 | 0.000279 | -2.06935 | RHEB_cKO down vs WT | -1.04918 -6σ | 5 B3 5      | 70693    | 70693    | Adgra3    | adhesion G protein-coupled receptor A3                                 |
| TC01000035 | 0.068238 | -2.0704  | RHEB_cKO down vs WT | -1.04991 -6σ | 1 H3 1      | 15490    | 15490    | Hsd17b7   | hydroxysteroid (17-beta) dehydrogenase 7                               |
| TC08000008 | 0.122033 | -2.0706  | RHEB_cKO down vs WT | -1.05005 -6σ | 8 C1 8 35.  | 15368    | 15368    | Hmox1     | heme oxygenase 1                                                       |
| TC17000024 | 0.05036  | -2.07362 | RHEB_cKO down vs WT | -1.05215 -6σ | 17 E1.1 17  | 19274    | 19274    | Ptpm      | protein tyrosine phosphatase, receptor type, M                         |
| TC19000016 | 0.053144 | -2.07699 | RHEB_cKO down vs WT | -1.05449 -6σ | 19 C3 19 :  | 13074    | 13074    | Cyp17a1   | cytochrome P450, family 17, subfamily a, polypeptide 1                 |
| TC05000008 | 0.000315 | -2.08701 | RHEB_cKO down vs WT | -1.06144 -6σ | 5 E2 5      | 231440   | 231440   | Parm1     | prostate androgen-regulated mucin-like protein 1                       |
| TC13000000 | 0.093413 | -2.09356 | RHEB_cKO down vs WT | -1.06596 -6σ | 13 A1 13 :  | 14706    | 14706    | Gng4      | guanine nucleotide binding protein (G protein), gamma 4                |
| TC09000031 | 0.066736 | -2.0984  | RHEB_cKO down vs WT | -1.06929 -6σ | 9 F3 9      | 70031    | 70031    | Cmtm8     | CKLF-like MARVEL transmembrane domain containing 8                     |
| TC11000027 | 0.034198 | -2.09948 | RHEB_cKO down vs WT | -1.07003 -6σ | 11 B1.3 11  | 246049   | 246049   | Slc36a2   | solute carrier family 36 (proton/amino acid symporter), member 2       |
| TC13000005 | 0.371694 | -2.10091 | RHEB_cKO down vs WT | -1.07101 -6σ | 13 13 B1    | 66695    | 66695    | Aspn      | asporin                                                                |
| TC13000013 | 0.15148  | -2.10191 | RHEB_cKO down vs WT | -1.0717 -6σ  | 13 A1 13    | 70405    | 70405    | Calml3    | calmodulin-like 3                                                      |
| TC11000006 | 0.006155 | -2.10281 | RHEB_cKO down vs WT | -1.07232 -6σ | 11 B1.3 11  | 215335   | 215335   | Slc36a1   | solute carrier family 36 (proton/amino acid symporter), member 1       |
| TC07000027 | 0.004073 | -2.10291 | RHEB_cKO down vs WT | -1.07239 -6σ | 7 B1 7      | 76718    | 76718    | Catsperg2 | catsper channel auxiliary subunit gamma 2                              |
| TC03000008 | 0.050686 | -2.10303 | RHEB_cKO down vs WT | -1.07247 -6σ | 3 F2.1 3    | 99681    | 99681    | Tchh      | trichohyalin                                                           |
| TC0X000002 | 0.037458 | -2.10326 | RHEB_cKO down vs WT | -1.07263 -6σ | X A1.3 X    | 19733    | 19733    | Rgn       | regucalcin                                                             |
| TC11000037 | 0.031723 | -2.10772 | RHEB_cKO down vs WT | -1.07568 -6σ | 11 D 11 6:  | 268482   | 268482   | Krt12     | keratin 12                                                             |
| TC16000020 | 0.140028 | -2.10846 | RHEB_cKO down vs WT | -1.07619 -6σ | 16 C3.3 16  | 71363    | 71363    | Krtap7-1  | keratin associated protein 7-1                                         |
| TC03000024 | 0.139238 | -2.10971 | RHEB_cKO down vs WT | -1.07705 -6σ | 3 F1 3      | 66195    | 66195    | Lce1g     | late cornified envelope 1G                                             |
| TC05000028 | 0.331805 | -2.11566 | RHEB_cKO down vs WT | -1.08111 -6σ | 5 E4 5 50.  | 13602    | 13602    | Sparcl1   | SPARC-like 1                                                           |
| TC05000010 | 0.001051 | -2.11664 | RHEB_cKO down vs WT | -1.08178 -6σ | 5 F 5       | 433931   | 433931   | Pigg      | phosphatidylinositol glycan anchor biosynthesis, class G               |
| TC14000023 | 0.000564 | -2.1179  | RHEB_cKO down vs WT | -1.08263 -6σ | 14 D3 14 :  | 1.01E+08 | 1.01E+08 | Gm20290   | predicted gene, 20290                                                  |
| TC10000011 | 0.332483 | -2.11833 | RHEB_cKO down vs WT | -1.08293 -6σ | 10 C3 10 :  | 17022    | 17022    | Lum       | lumican                                                                |
| TC15000022 | 0.228862 | -2.1186  | RHEB_cKO down vs WT | -1.08311 -6σ | 15 F3 15    | 406220   | 406220   | Krt77     | keratin 77                                                             |
| TC04000016 | 0.001621 | -2.12145 | RHEB_cKO down vs WT | -1.08505 -6σ | 4 D3 4      | 230837   | 230837   | Asap3     | ArfGAP with SH3 domain, ankyrin repeat and PH domain 3                 |
| TC07000006 | 0.005923 | -2.12274 | RHEB_cKO down vs WT | -1.08593 -6σ | 7 B1 7 20.  | 18624    | 18624    | Pepd      | peptidase D                                                            |
| TC01000018 | 0.068687 | -2.12415 | RHEB_cKO down vs WT | -1.08689 -6σ | 1 H6 1 97.  | 22782    | 22782    | Slc30a1   | solute carrier family 30 (zinc transporter), member 1                  |
| TC15000023 | 0.003845 | -2.12854 | RHEB_cKO down vs WT | -1.08986 -6σ | 15 F3 15    | 67488    | 67488    | Calcoco1  | calcium binding and coiled coil domain 1                               |
| TC10000015 | 0.053478 | -2.1305  | RHEB_cKO down vs WT | -1.09119 -6σ | 10 D3 10 :  | 107605   | 107605   | Rdh1      | retinol dehydrogenase 1 (all trans)                                    |
| TC03000008 | 0.100278 | -2.13113 | RHEB_cKO down vs WT | -1.09162 -6σ | 3 F1 3      | 73719    | 73719    | Lce1c     | late cornified envelope 1C                                             |
| TC09000025 | 0.190572 | -2.13211 | RHEB_cKO down vs WT | -1.09228 -6σ | 9 F1 9      | 56318    | 56318    | Acpp      | acid phosphatase, prostate                                             |
| TC04000016 | 0.022262 | -2.13303 | RHEB_cKO down vs WT | -1.0929 -6σ  | 4 D3 4      | 71904    | 71904    | Paqr7     | progesterin and adipoQ receptor family member VII                      |
| TC11000037 | 0.051619 | -2.13362 | RHEB_cKO down vs WT | -1.0933 -6σ  | 11 D 11 6:  | 16665    | 16665    | Krt15     | keratin 15                                                             |
| TC19000015 | 0.039597 | -2.13803 | RHEB_cKO down vs WT | -1.09628 -6σ | 19 C3 19 :  | 20249    | 20249    | Scd1      | stearoyl-Coenzyme A desaturase 1                                       |
| TC15000000 | 0.007315 | -2.13946 | RHEB_cKO down vs WT | -1.09725 -6σ | 15 A1 15 1  | 20363    | 20363    | Sepp1     | selenoprotein P, plasma, 1                                             |
| TC07000037 | 0.094002 | -2.14052 | RHEB_cKO down vs WT | -1.09796 -6σ | 7 7 F1      | 67800    | 67800    | Dgat2     | diacylglycerol O-acyltransferase 2                                     |
| TC04000041 | 0.01574  | -2.14242 | RHEB_cKO down vs WT | -1.09924 -6σ | 4 E2 4      | 66469    | 66469    | Fam213b   | family with sequence similarity 213, member B                          |
| TC03000024 | 0.191886 | -2.1436  | RHEB_cKO down vs WT | -1.10003 -6σ | 3 F1 3      | 66533    | 66533    | 2310050C  | RIKEN cDNA 2310050C09 gene                                             |
| TC06000015 | 0.010268 | -2.14849 | RHEB_cKO down vs WT | -1.10332 -6σ | 6 F3 6      | 57436    | 57436    | Gabarap1  | gamma-aminobutyric acid (GABA) A receptor-associated protein-like 1    |
| TC03000024 | 0.16839  | -2.14967 | RHEB_cKO down vs WT | -1.10412 -6σ | 3 F1 3      | 73730    | 73730    | Lce1l     | late cornified envelope 1L                                             |
| TC09000001 | 0.013923 | -2.15058 | RHEB_cKO down vs WT | -1.10473 -6σ | 9 9 A3      | 75747    | 75747    | Sesn3     | sestrin 3                                                              |
| TC01000024 | 0.003731 | -2.15461 | RHEB_cKO down vs WT | -1.10743 -6σ | 1 C2 1      | 241075   | 241075   | Plekhh3   | pleckstrin homology domain containing, family M, member 3              |
| TC13000005 | 0.017488 | -2.1635  | RHEB_cKO down vs WT | -1.11337 -6σ | 13 C3 13    | 105171   | 105171   | Arrec3    | arrestin domain containing 3                                           |
| TC17000010 | 0.008377 | -2.16514 | RHEB_cKO down vs WT | -1.11446 -6σ | 17 E1.1 17  | 14158    | 14158    | Fer       | fer (fms/fps related) protein kinase                                   |
| TC15000012 | 0.009577 | -2.16564 | RHEB_cKO down vs WT | -1.11479 -6σ | 15 15 A2    | 68070    | 68070    | Pdzd2     | PDZ domain containing 2                                                |
| TC15000020 | 0.010718 | -2.16781 | RHEB_cKO down vs WT | -1.11624 -6σ | 15 E3 15 4  | 16564    | 16564    | Kif21a    | kinesin family member 21A                                              |
| TC13000005 | 0.135976 | -2.17174 | RHEB_cKO down vs WT | -1.11885 -6σ | 13 B 13 24  | 15904    | 15904    | Id4       | inhibitor of DNA binding 4                                             |
| TC16000021 | 0.095697 | -2.17449 | RHEB_cKO down vs WT | -1.12068 -6σ | 16 C4 16    | 207781   | 207781   | C2cd2     | C2 calcium-dependent domain containing 2                               |

|            |          |          |                     |              |            |        |                  |                                                                            |
|------------|----------|----------|---------------------|--------------|------------|--------|------------------|----------------------------------------------------------------------------|
| TC0300000E | 0.001301 | -2.1772  | RHEB_cKO down vs WT | -1.12247 -6σ | 3 3 F2     | 19885  | 19885 Rorc       | RAR-related orphan receptor gamma                                          |
| TC01000011 | 0.102276 | -2.17891 | RHEB_cKO down vs WT | -1.12361 -6σ | 1 E4 1     | 226418 | 226418 Yod1      | YOD1 OTU deubiquitinating enzyme 1 homologue (S. cerevisiae)               |
| TC0700000E | 0.004106 | -2.18033 | RHEB_cKO down vs WT | -1.12455 -6σ | 7 B4 7     | 66065  | 66065 Hsd17b14   | hydroxysteroid (17-beta) dehydrogenase 14                                  |
| TC1500001E | 0.000293 | -2.18398 | RHEB_cKO down vs WT | -1.12696 -6σ | 15 D1 15   | 20649  | 20649 Sntb1      | syntrophin, basic 1                                                        |
| TC0100000E | 0.306842 | -2.18502 | RHEB_cKO down vs WT | -1.12765 -6σ | 1 D 1      | 13345  | 13345 Twist2     | twist basic helix-loop-helix transcription factor 2                        |
| TC1000001E | 0.016005 | -2.18728 | RHEB_cKO down vs WT | -1.12914 -6σ | 10 A1 10   | 670558 | 670558 H60c      | histocompatibility 60c                                                     |
| TC13000021 | 0.076425 | -2.18751 | RHEB_cKO down vs WT | -1.12929 -6σ | 13 B1 13   | 114304 | 114304 Slc28a3   | solute carrier family 28 (sodium-coupled nucleoside transporter), member 3 |
| TC10000022 | 0.02305  | -2.18813 | RHEB_cKO down vs WT | -1.1297 -6σ  | 10 B4 10   | 20397  | 20397 Sgpl1      | sphingosine phosphate lyase 1                                              |
| TC03000024 | 0.117148 | -2.18837 | RHEB_cKO down vs WT | -1.12986 -6σ | 3 F1 3     | 68720  | 68720 Lce1b      | late cornified envelope 1B                                                 |
| TC02000002 | 0.025301 | -2.18984 | RHEB_cKO down vs WT | -1.13083 -6σ | 2 A2-A3 2  | 67448  | 67448 Plxdc2     | plexin domain containing 2                                                 |
| TC06000012 | 0.020492 | -2.1912  | RHEB_cKO down vs WT | -1.13172 -6σ | 6 6        | 71779  | 71779 March8     | membrane-associated ring finger (C3HC4) 8                                  |
| TC1200001E | 0.002122 | -2.19863 | RHEB_cKO down vs WT | -1.13661 -6σ | 12 C3 12   | 66375  | 66375 Dhrr5      | dehydrogenase/reductase (SDR family) member 7                              |
| TC0800001C | 0.000563 | -2.20453 | RHEB_cKO down vs WT | -1.14047 -6σ | 8 C3 8     | 66887  | 66887 Lonp2      | lon peptidase 2, peroxisomal                                               |
| TC19000001 | 0.001804 | -2.20736 | RHEB_cKO down vs WT | -1.14232 -6σ | 19 A 19    | 225898 | 225898 Eml3      | echinoderm microtubule associated protein like 3                           |
| TC15000001 | 0.000709 | -2.20815 | RHEB_cKO down vs WT | -1.14284 -6σ | 15 B1 15   | 223431 | 223431 Tiaf2     | TGF-beta1-induced anti-apoptotic factor 2                                  |
| TC0300002E | 0.001316 | -2.2092  | RHEB_cKO down vs WT | -1.14353 -6σ | 3 G-H1 3   | 19299  | 19299 Abcd3      | ATP-binding cassette, sub-family D (ALD), member 3                         |
| TC0500002E | 0.011368 | -2.21074 | RHEB_cKO down vs WT | -1.14453 -6σ | 5 F 5      | 243197 | 243197 Mfsd7a    | major facilitator superfamily domain containing 7A                         |
| TC0100000E | 0.066969 | -2.21583 | RHEB_cKO down vs WT | -1.14785 -6σ | 1 D 1      | 404545 | 404545 Ano7      | anoctamin 7                                                                |
| TC19000004 | 0.225603 | -2.22127 | RHEB_cKO down vs WT | -1.15138 -6σ | 19 C1 19   | 70166  | 70166 Lipn       | lipase, family member N                                                    |
| TC0800002E | 0.054128 | -2.22272 | RHEB_cKO down vs WT | -1.15233 -6σ | 8 B3.1 8   | 12876  | 12876 Cpe        | carboxypeptidase E                                                         |
| TC0100002E | 0.029058 | -2.22333 | RHEB_cKO down vs WT | -1.15272 -6σ | 1 D 1      | 71874  | 71874 2310007B   | RIKEN cDNA 2310007B03 gene                                                 |
| TC1500000C | 0.025011 | -2.22808 | RHEB_cKO down vs WT | -1.1558 -6σ  | 15 A1 15   | 223337 | 223337 Ugt3a2    | UDP glycosyltransferases 3 family, polypeptide A2                          |
| TC1300000E | 0.038675 | -2.23245 | RHEB_cKO down vs WT | -1.15863 -6σ | 13 B-C1 13 | 21810  | 21810 Tgfb1      | transforming growth factor, beta induced                                   |
| TC0X00003E | 0.011686 | -2.23865 | RHEB_cKO down vs WT | -1.16263 -6σ | X F5 X     | 76763  | 76763 Mospd2     | motile sperm domain containing 2                                           |
| TC1100003C | 0.000967 | -2.24113 | RHEB_cKO down vs WT | -1.16423 -6σ | 11 B3 11   | 11684  | 11684 Alox12     | arachidonate 12-lipoxygenase                                               |
| TC0500002E | 0.258736 | -2.24675 | RHEB_cKO down vs WT | -1.16784 -6σ | 5 E1 5     | 243083 | 243083 Tmprss11f | transmembrane protease, serine 11f                                         |
| TC03000024 | 0.117025 | -2.2468  | RHEB_cKO down vs WT | -1.16787 -6σ | 3 F1 3     | 73722  | 73722 Lce1a2     | late cornified envelope 1A2                                                |
| TC0400003E | 0.000459 | -2.25018 | RHEB_cKO down vs WT | -1.17004 -6σ | 4 D3 4     | 68943  | 68943 Pink1      | PTEN induced putative kinase 1                                             |
| TC01000031 | 0.006054 | -2.25543 | RHEB_cKO down vs WT | -1.1734 -6σ  | 1 E4 1     | 12227  | 12227 Btg2       | B cell translocation gene 2, anti-proliferative                            |
| TC0400003E | 0.012275 | -2.2603  | RHEB_cKO down vs WT | -1.17652 -6σ | ---        | ---    | Gm12818          | predicted gene 12818                                                       |
| TC19000012 | 0.00886  | -2.26083 | RHEB_cKO down vs WT | -1.17685 -6σ | 19 B 19    | 26358  | 26358 Aldh1a7    | aldehyde dehydrogenase family 1, subfamily A7                              |
| TC09000007 | 0.223887 | -2.26252 | RHEB_cKO down vs WT | -1.17793 -6σ | 9 B 9      | 13070  | 13070 Cyp11a1    | cytochrome P450, family 11, subfamily a, polypeptide 1                     |
| TC1400001E | 0.007693 | -2.26509 | RHEB_cKO down vs WT | -1.17957 -6σ | 14 E5 14   | 69634  | 69634 Clybl      | citrate lyase beta like                                                    |
| TC0300000E | 0.190048 | -2.26678 | RHEB_cKO down vs WT | -1.18064 -6σ | 3 F2.1 3   | 381457 | 381457 Crnn      | cornulin                                                                   |
| TC0900002E | 0.014428 | -2.26811 | RHEB_cKO down vs WT | -1.18149 -6σ | 9 D 9      | 64008  | 64008 Aqp9       | aquaporin 9                                                                |
| TC0400001E | 0.014481 | -2.26888 | RHEB_cKO down vs WT | -1.18198 -6σ | 4 E2 4     | 67087  | 67087 Ctnnbip1   | catenin beta interacting protein 1                                         |
| TC08000004 | 0.0011   | -2.26926 | RHEB_cKO down vs WT | -1.18222 -6σ | 8 A4 8     | 244416 | 244416 Ppp1r3b   | protein phosphatase 1, regulatory (inhibitor) subunit 3B                   |
| TC1900001C | 0.070469 | -2.27195 | RHEB_cKO down vs WT | -1.18393 -6σ | 19 A 19    | 22287  | 22287 Scgb1a1    | secretoglobin, family 1A, member 1 (uteroglobin)                           |
| TC1400002C | 0.017752 | -2.27209 | RHEB_cKO down vs WT | -1.18402 -6σ | 14 C2 14   | 29811  | 29811 Ndrp2      | N-myc downstream regulated gene 2                                          |
| TC03000011 | 0.019457 | -2.273   | RHEB_cKO down vs WT | -1.1846 -6σ  | 3 F2.3 3   | 72121  | 72121 Dennd2d    | DENN/MADD domain containing 2D                                             |
| TC03000024 | 0.024508 | -2.27622 | RHEB_cKO down vs WT | -1.18664 -6σ | 3 F2.1 3   | 545551 | 545551 BC021767  | cingulin pseudogene                                                        |
| TC03000024 | 0.15926  | -2.27815 | RHEB_cKO down vs WT | -1.18787 -6σ | 3 F1 3     | 76585  | 76585 Lce1i      | late cornified envelope 1I                                                 |
| TC03000021 | 0.201969 | -2.28325 | RHEB_cKO down vs WT | -1.19109 -6σ | 3 E1 3     | 109222 | 109222 Rarres1   | retinoic acid receptor responder (tazarotene induced) 1                    |
| TC1600001E | 0.054399 | -2.2896  | RHEB_cKO down vs WT | -1.1951 -6σ  | 16 B5 16   | 433022 | 433022 Plcx2     | phosphatidylinositol-specific phospholipase C, X domain containing 2       |
| TC03000024 | 0.041812 | -2.29304 | RHEB_cKO down vs WT | -1.19726 -6σ | ---        | ---    | Gm15264          | predicted gene 15264                                                       |
| TC0300001E | 0.009426 | -2.29666 | RHEB_cKO down vs WT | -1.19954 -6σ | 3 H4 3     | 433667 | 433667 Ankrd13c  | ankyrin repeat domain 13c                                                  |
| TC03000004 | 0.019484 | -2.29747 | RHEB_cKO down vs WT | -1.20005 -6σ | 3 D 3      | 67758  | 67758 Aadac      | arylacetamide deacetylase (esterase)                                       |
| TC04000014 | 0.000287 | -2.29762 | RHEB_cKO down vs WT | -1.20014 -6σ | 4 D2.2 4   | 230726 | 230726 Rhbdl2    | rhomboid, veinlet-like 2 (Drosophila)                                      |
| TC11000027 | 0.038189 | -2.29779 | RHEB_cKO down vs WT | -1.20025 -6σ | ---        | ---    | Gm12220          | predicted gene 12220                                                       |
| TC0300002E | 0.111396 | -2.30765 | RHEB_cKO down vs WT | -1.20643 -6σ | 3 3        | 78382  | 78382 Lce6a      | late cornified envelope 6A                                                 |
| TC0300002E | 0.124619 | -2.30782 | RHEB_cKO down vs WT | -1.20653 -6σ | 3 F1 3     | 16447  | 16447 Ivl        | involucrin                                                                 |
| TC07000004 | 0.019862 | -2.31655 | RHEB_cKO down vs WT | -1.21198 -6σ | 7 A3 7     | 13088  | 13088 Cyp2b10    | cytochrome P450, family 2, subfamily b, polypeptide 10                     |
| TC09000011 | 0.074425 | -2.31664 | RHEB_cKO down vs WT | -1.21204 -6σ | 9 9        | 23959  | 23959 Nt5e       | 5' nucleotidase, ecto                                                      |
| TC1600002C | 0.012356 | -2.3182  | RHEB_cKO down vs WT | -1.21301 -6σ | 16 C3.3 16 | 69699  | 69699 2310079G   | RIKEN cDNA 2310079G19 gene                                                 |
| TC11000012 | 0.006744 | -2.32196 | RHEB_cKO down vs WT | -1.21534 -6σ | 11 11      | 217026 | 217026 Heatr6    | HEAT repeat containing 6                                                   |
| TC0100002E | 0.005462 | -2.3316  | RHEB_cKO down vs WT | -1.22132 -6σ | 1 1        | 72999  | 72999 Insig2     | insulin induced gene 2                                                     |
| TC0300000E | 0.007072 | -2.33574 | RHEB_cKO down vs WT | -1.22388 -6σ | 3 F2.1 3   | 20342  | 20342 Selenbp2   | selenium binding protein 2                                                 |
| TC1300001E | 0.076949 | -2.33606 | RHEB_cKO down vs WT | -1.22408 -6σ | ---        | ---    | Hsp25-ps1        | heat shock protein 25, pseudogene 1                                        |
| TC01000022 | 8.72E-05 | -2.3406  | RHEB_cKO down vs WT | -1.22688 -6σ | 1 1        | 53945  | 53945 Slc40a1    | solute carrier family 40 (iron-regulated transporter), member 1            |
| TC03000004 | 0.002509 | -2.34142 | RHEB_cKO down vs WT | -1.22738 -6σ | 3 E1 3     | 622434 | 622434 Arhgef26  | Rho guanine nucleotide exchange factor (GEF) 26                            |
| TC0500000E | 0.010058 | -2.34319 | RHEB_cKO down vs WT | -1.22848 -6σ | 5 E4 5     | 74596  | 74596 Cds1       | CDP-diacylglycerol synthase 1                                              |
| TC02000011 | 0.042796 | -2.34338 | RHEB_cKO down vs WT | -1.22859 -6σ | 2 2        | 70599  | 70599 Sfsa2      | sperm specific antigen 2                                                   |
| TC0600003E | 0.002066 | -2.34361 | RHEB_cKO down vs WT | -1.22873 -6σ | 6 F3 6     | 677440 | 677440 Clec2j    | C-type lectin domain family 2, member J                                    |
| TC19000001 | 0.010439 | -2.34841 | RHEB_cKO down vs WT | -1.23169 -6σ | 19 A 19    | 225845 | 225845 Pla2g16   | phospholipase A2, group XVI                                                |
| TC01000027 | 0.007468 | -2.35304 | RHEB_cKO down vs WT | -1.23452 -6σ | 1 C5 1     | 71781  | 71781 Slc16a14   | solute carrier family 16 (monocarboxylic acid transporters), member 14     |
| TC0X00002E | 0.028648 | -2.35438 | RHEB_cKO down vs WT | -1.23535 -6σ | X C3 X     | 236900 | 236900 Pdk3      | pyruvate dehydrogenase kinase, isoenzyme 3                                 |
| TC10000007 | 0.005943 | -2.35702 | RHEB_cKO down vs WT | -1.23697 -6σ | 10 C1 10   | 216136 | 216136 Ilvbl     | ilvB (bacterial acetolactate synthase)-like                                |
| TC06000004 | 0.002253 | -2.35801 | RHEB_cKO down vs WT | -1.23757 -6σ | 6 B2.1 6   | 76263  | 76263 Gstk1      | glutathione S-transferase kappa 1                                          |
| TC04000011 | 0.000481 | -2.36699 | RHEB_cKO down vs WT | -1.24305 -6σ | 4 D1 4     | 639774 | 639774 Skint8    | selection and upkeep of intraepithelial T cells 8                          |
| TC0600001E | 0.009913 | -2.36726 | RHEB_cKO down vs WT | -1.24322 -6σ | 6 A1 6     | 269823 | 269823 Pon3      | paraoxonase 3                                                              |
| TC0800002C | 0.093352 | -2.37017 | RHEB_cKO down vs WT | -1.24499 -6σ | 8 8        | 71908  | 71908 Cldn23     | claudin 23                                                                 |
| TC0900001E | 0.057442 | -2.37257 | RHEB_cKO down vs WT | -1.24645 -6σ | 9 A4 9     | 244757 | 244757 Glb1l2    | galactosidase, beta 1-like 2                                               |
| TC02000004 | 0.056944 | -2.37495 | RHEB_cKO down vs WT | -1.2479 -6σ  | 2 A3 2     | 69454  | 69454 Clic3      | chloride intracellular channel 3                                           |
| TC15000012 | 0.007333 | -2.37716 | RHEB_cKO down vs WT | -1.24924 -6σ | 15 15      | 75646  | 75646 Rai14      | retinoic acid induced 14                                                   |
| TC04000041 | 0.022645 | -2.38227 | RHEB_cKO down vs WT | -1.25234 -6σ | 4 E2 4     | 83771  | 83771 Tas1r3     | taste receptor, type 1, member 3                                           |
| TC09000012 | 0.020447 | -2.385   | RHEB_cKO down vs WT | -1.25399 -6σ | 9 E3.3 9   | 19660  | 19660 Rbp2       | retinol binding protein 2, cellular                                        |
| TC11000034 | 0.01665  | -2.38562 | RHEB_cKO down vs WT | -1.25437 -6σ | 11 C 11    | 77864  | 77864 Ypel2      | yippee-like 2 (Drosophila)                                                 |
| TC19000004 | 0.016502 | -2.3865  | RHEB_cKO down vs WT | -1.25489 -6σ | 19 C1 19   | 17330  | 17330 Minpp1     | multiple inositol polyphosphate histidine phosphatase 1                    |
| TC06000012 | 0.006847 | -2.38663 | RHEB_cKO down vs WT | -1.25498 -6σ | 6 E3 6     | 108960 | 108960 Irak2     | interleukin-1 receptor-associated kinase 2                                 |
| TC1300000E | 0.013251 | -2.38826 | RHEB_cKO down vs WT | -1.25596 -6σ | ---        | ---    | Gm11379          | predicted gene 11379                                                       |
| TC0400001C | 0.078529 | -2.38975 | RHEB_cKO down vs WT | -1.25686 -6σ | 4 C6 4     | 67916  | 67916 Plpp3      | phospholipid phosphatase 3                                                 |
| TC0900001E | 0.017397 | -2.40396 | RHEB_cKO down vs WT | -1.26541 -6σ | 9 9        | 94226  | 94226 S1pr5      | sphingosine-1-phosphate receptor 5                                         |
| TC03000011 | 0.007855 | -2.40592 | RHEB_cKO down vs WT | -1.26659 -6σ | 3 F2.3 3   | 14866  | 14866 Gstm5      | glutathione S-transferase, mu 5                                            |
| TC1700001E | 0.041283 | -2.40605 | RHEB_cKO down vs WT | -1.26667 -6σ | 17 A3.3 17 | 69259  | 69259 Kctd5      | potassium channel tetramerisation domain containing 5                      |
| TC08000024 | 0.018991 | -2.4081  | RHEB_cKO down vs WT | -1.2679 -6σ  | 8 B3.3 8   | 382014 | 382014 Ano8      | anoctamin 8                                                                |
| TC1900001E | 0.006414 | -2.41128 | RHEB_cKO down vs WT | -1.2698 -6σ  | 19 D2 19   | 14732  | 14732 Gpam       | glycerol-3-phosphate acyltransferase, mitochondrial                        |
| TC0400001E | 0.028882 | -2.41338 | RHEB_cKO down vs WT | -1.27106 -6σ | 4 D3 4     | 230828 | 230828 Il22ra1   | interleukin 22 receptor, alpha 1                                           |
| TC04000011 | 0.003855 | -2.41943 | RHEB_cKO down vs WT | -1.27467 -6σ | 4 C7 4     | 69908  | 69908 Rab3b      | RAB3B, member RAS oncogene family                                          |
| TC03000024 | 0.139369 | -2.42574 | RHEB_cKO down vs WT | -1.27842 -6σ | 3 F1 3     | 545547 | 545547 Lce1j     | late cornified envelope 1J                                                 |

|            |          |          |                     |              |             |          |          |                                     |                                                                                    |
|------------|----------|----------|---------------------|--------------|-------------|----------|----------|-------------------------------------|------------------------------------------------------------------------------------|
| TC07000021 | 0.012098 | -2.42853 | RHEB_cKO down vs WT | -1.28008 -6σ | 7 F5 7      | 1.01E+08 | 1.01E+08 | Bc1                                 | brain cytoplasmic RNA 1                                                            |
| TC1000001E | 0.045753 | -2.43004 | RHEB_cKO down vs WT | -1.28098 -6σ | 10 10 A2    | 56016    | 56016    | Hebp2                               | heme binding protein 2                                                             |
| TC1400002E | 0.013856 | -2.43305 | RHEB_cKO down vs WT | -1.28276 -6σ | 14 D2 14    | 268759   | 268759   | 9930012K:RIKEN cDNA 9930012K11 gene |                                                                                    |
| TC0400001E | 0.005782 | -2.43659 | RHEB_cKO down vs WT | -1.28486 -6σ | 4 4 E1      | 71890    | 71890    | Mad2l2                              | MAD2 mitotic arrest deficient-like 2                                               |
| TC04000011 | 0.005248 | -2.44088 | RHEB_cKO down vs WT | -1.2874 -6σ  | 4 D1 4      | 320640   | 320640   | Skint4                              | selection and upkeep of intraepithelial T cells 4                                  |
| TC15000002 | 0.384561 | -2.4441  | RHEB_cKO down vs WT | -1.2893 -6σ  | 15 B3.1 1E  | 107587   | 107587   | Osr2                                | odd-skipped related 2                                                              |
| TC0500001E | 0.014474 | -2.44613 | RHEB_cKO down vs WT | -1.2905 -6σ  | 5 F 5 57.8  | 57816    | 57816    | Tesc                                | tescalcin                                                                          |
| TC0400001E | 0.008696 | -2.44879 | RHEB_cKO down vs WT | -1.29207 -6σ | 4 D3 4 68.  | 71665    | 71665    | Fuca1                               | fucosidase, alpha-L- 1, tissue                                                     |
| TC0X000005 | 0.000749 | -2.45248 | RHEB_cKO down vs WT | -1.29424 -6σ | X X C2      | 71584    | 71584    | Gdpd2                               | glycerophosphodiester phosphodiesterase domain containing 2                        |
| TC1000002C | 0.002797 | -2.46018 | RHEB_cKO down vs WT | -1.29876 -6σ | 10 B2 10 2  | 11630    | 11630    | Aim1                                | absent in melanoma 1                                                               |
| TC0500000E | 0.001805 | -2.46186 | RHEB_cKO down vs WT | -1.29975 -6σ | 5 B1 5      | 80911    | 80911    | Acox3                               | acyl-Coenzyme A oxidase 3, pristanoyl                                              |
| TC03000024 | 0.088657 | -2.46822 | RHEB_cKO down vs WT | -1.30347 -6σ | 3 F1 3      | 67127    | 67127    | Lce1a1                              | late cornified envelope 1A1                                                        |
| TC0X000021 | 0.033949 | -2.46985 | RHEB_cKO down vs WT | -1.30442 -6σ | X A4 X      | 208884   | 208884   | Zdhhc9                              | zinc finger, DHHC domain containing 9                                              |
| TC06000034 | 0.039421 | -2.47301 | RHEB_cKO down vs WT | -1.30627 -6σ | 6 A1 6      | 170772   | 170772   | Glcci1                              | glucocorticoid induced transcript 1                                                |
| TC0700000E | 0.001934 | -2.48552 | RHEB_cKO down vs WT | -1.31355 -6σ | ---         | ---      | ---      | Gm14377                             | predicted gene 14377                                                               |
| TC1000002E | 0.003413 | -2.48562 | RHEB_cKO down vs WT | -1.31361 -6σ | 10 C1 10    | 27375    | 27375    | Tjp3                                | tight junction protein 3                                                           |
| TC0500002E | 0.105186 | -2.4868  | RHEB_cKO down vs WT | -1.31429 -6σ | 5 5 D       | 16924    | 16924    | LnX1                                | ligand of numb-protein X 1                                                         |
| TC1100003E | 0.000877 | -2.48804 | RHEB_cKO down vs WT | -1.31501 -6σ | ---         | ---      | ---      | Gm11611                             | predicted gene 11611                                                               |
| TC0400003E | 0.005998 | -2.48839 | RHEB_cKO down vs WT | -1.31521 -6σ | 4 D1 4      | 230612   | 230612   | Slc5a9                              | solute carrier family 5 (sodium/glucose cotransporter), member 9                   |
| TC0900000E | 0.002441 | -2.49209 | RHEB_cKO down vs WT | -1.31735 -6σ | 9 A5.2 9    | 59095    | 59095    | Fxyd6                               | FXD domain-containing ion transport regulator 6                                    |
| TC0700000E | 0.00636  | -2.50216 | RHEB_cKO down vs WT | -1.32317 -6σ | 7 B2 7      | 245886   | 245886   | Ankrd27                             | ankyrin repeat domain 27 (VPS9 domain)                                             |
| TC11000002 | 0.009222 | -2.50944 | RHEB_cKO down vs WT | -1.32736 -6σ | 11 11 A4    | 216616   | 216616   | Efemp1                              | epidermal growth factor-containing fibulin-like extracellular matrix protein 1     |
| TC0300000E | 0.014518 | -2.51599 | RHEB_cKO down vs WT | -1.33113 -6σ | 3 3         | 1E+08    | 1E+08    | Sprr2a2                             | small proline-rich protein 2A2                                                     |
| TC03000024 | 0.025319 | -2.53783 | RHEB_cKO down vs WT | -1.34359 -6σ | 3 F2.1 3 4E | 70737    | 70737    | Cgn                                 | cingulin                                                                           |
| TC04000011 | 0.02117  | -2.54007 | RHEB_cKO down vs WT | -1.34487 -6σ | 4 D1 4      | 639781   | 639781   | Skint1                              | selection and upkeep of intraepithelial T cells 1                                  |
| TC0300000E | 0.003747 | -2.54401 | RHEB_cKO down vs WT | -1.3471 -6σ  | 3 F2.1 3 4E | 20341    | 20341    | Selenbp1                            | selenium binding protein 1                                                         |
| TC1400001C | 0.114568 | -2.54471 | RHEB_cKO down vs WT | -1.3475 -6σ  | 14 14 D2    | 67516    | 67516    | Kctd4                               | potassium channel tetramerisation domain containing 4                              |
| TSUnmappe  | 0.012715 | -2.55336 | RHEB_cKO down vs WT | -1.3524 -6σ  | X;Y XY 75.1 | 20905    | 20905    | Sts                                 | steroid sulfatase                                                                  |
| TC03000024 | 0.141383 | -2.56568 | RHEB_cKO down vs WT | -1.35934 -6σ | 3 F1 3      | 69611    | 69611    | Lce1d                               | late cornified envelope 1D                                                         |
| TC04000004 | 0.041258 | -2.56894 | RHEB_cKO down vs WT | -1.36117 -6σ | 4 B1 4      | 666060   | 666060   | Frmpp1                              | FERM and PDZ domain containing 1                                                   |
| TC14000021 | 0.352033 | -2.57326 | RHEB_cKO down vs WT | -1.3636 -6σ  | 14 C3 14 2  | 17227    | 17227    | Mcpt4                               | mast cell protease 4                                                               |
| TC13000024 | 0.018032 | -2.57371 | RHEB_cKO down vs WT | -1.36385 -6σ | 13 D1 13    | 218461   | 218461   | Pde8b                               | phosphodiesterase 8B                                                               |
| TC1700001C | 0.029278 | -2.57386 | RHEB_cKO down vs WT | -1.36393 -6σ | ---         | ---      | ---      | Gm5815                              | predicted pseudogene 5815                                                          |
| TC0900003E | 0.009067 | -2.57685 | RHEB_cKO down vs WT | -1.36561 -6σ | 9 F4 9      | 102566   | 102566   | Ano10                               | anoctamin 10                                                                       |
| TC11000027 | 0.033412 | -2.57857 | RHEB_cKO down vs WT | -1.36657 -6σ | 11 B1.3 11  | 30805    | 30805    | Slc22a4                             | solute carrier family 22 (organic cation transporter), member 4                    |
| TC07000014 | 0.024026 | -2.58324 | RHEB_cKO down vs WT | -1.36918 -6σ | 7 E3 7      | 207278   | 207278   | Fchsd2                              | FCH and double SH3 domains 2                                                       |
| TC0100002E | 0.065807 | -2.58443 | RHEB_cKO down vs WT | -1.36984 -6σ | ---         | ---      | ---      | Gm8080                              | predicted gene 8080                                                                |
| TC0900001C | 0.003637 | -2.58463 | RHEB_cKO down vs WT | -1.36996 -6σ | 9 E2 9      | 212531   | 212531   | Sh3bgrl2                            | SH3 domain binding glutamic acid-rich protein like 2                               |
| TC08000007 | 0.000956 | -2.58838 | RHEB_cKO down vs WT | -1.37205 -6σ | 8 8 C1      | 72281    | 72281    | Sh2d4a                              | SH2 domain containing 4A                                                           |
| TC0100003C | 0.021788 | -2.60262 | RHEB_cKO down vs WT | -1.37997 -6σ | 1 E4 1      | 14270    | 14270    | Srgap2                              | SLIT-ROBO Rho GTPase activating protein 2                                          |
| TC0700000E | 0.049674 | -2.61392 | RHEB_cKO down vs WT | -1.38622 -6σ | 7 B4 7      | 67893    | 67893    | Tmem86a                             | transmembrane protein 86A                                                          |
| TC14000027 | 0.143177 | -2.62074 | RHEB_cKO down vs WT | -1.38997 -6σ | 14 E5 14    | 56643    | 56643    | Slc15a1                             | solute carrier family 15 (oligopeptide transporter), member 1                      |
| TC16000001 | 0.011118 | -2.62445 | RHEB_cKO down vs WT | -1.39202 -6σ | ---         | 74478    | 74478    | Snx29                               | sorting nexin 29                                                                   |
| TC13000027 | 0.043476 | -2.6333  | RHEB_cKO down vs WT | -1.39687 -6σ | 13 A2 13    | 21638    | 21638    | Tcrg-V4                             | T cell receptor gamma, variable 4                                                  |
| TC0900000E | 0.062307 | -2.63534 | RHEB_cKO down vs WT | -1.39799 -6σ | 9 A5.3 9 2  | 16173    | 16173    | Il18                                | interleukin 18                                                                     |
| TC0200001E | 0.005407 | -2.64328 | RHEB_cKO down vs WT | -1.40233 -6σ | 2 F1-F3 2 1 | 12010    | 12010    | B2m                                 | beta-2 microglobulin                                                               |
| TC07000027 | 0.004858 | -2.6436  | RHEB_cKO down vs WT | -1.4025 -6σ  | 7 B1 7      | 320225   | 320225   | Catsperg1                           | catsper channel auxiliary subunit gamma 1                                          |
| TC0600003E | 0.025776 | -2.65362 | RHEB_cKO down vs WT | -1.40796 -6σ | 6 G1 6      | 67729    | 67729    | Mansc1                              | MANSC domain containing 1                                                          |
| TC0700004E | 0.009791 | -2.65902 | RHEB_cKO down vs WT | -1.41089 -6σ | 7 F5 7      | 71345    | 71345    | Ano9                                | anoctamin 9                                                                        |
| TC04000027 | 0.017257 | -2.6626  | RHEB_cKO down vs WT | -1.41284 -6σ | 4 4 C1      | 67103    | 67103    | Ptgr1                               | prostaglandin reductase 1                                                          |
| TC0100001E | 0.405785 | -2.66285 | RHEB_cKO down vs WT | -1.41297 -6σ | 1 1 H2      | 56429    | 56429    | Dpt                                 | dermatopontin                                                                      |
| TC0700003E | 0.002155 | -2.6741  | RHEB_cKO down vs WT | -1.41905 -6σ | 7 7 D1      | 108116   | 108116   | Slco3a1                             | solute carrier organic anion transporter family, member 3a1                        |
| TC15000002 | 0.054849 | -2.67562 | RHEB_cKO down vs WT | -1.41987 -6σ | 15 B3.1 1E  | 114128   | 114128   | Laptm4b                             | lysosomal-associated protein transmembrane 4B                                      |
| TC0800001C | 0.089825 | -2.67792 | RHEB_cKO down vs WT | -1.42111 -6σ | 8 C5 8 44.  | 17390    | 17390    | Mmp2                                | matrix metalloproteinase 2                                                         |
| TC0100002E | 0.011474 | -2.67869 | RHEB_cKO down vs WT | -1.42153 -6σ | 1E2.1 1     | 394252   | 394252   | Serpnb3d                            | serine (or cysteine) peptidase inhibitor, clade B (ovalbumin), member 3D           |
| TC0100002E | 0.08064  | -2.68286 | RHEB_cKO down vs WT | -1.42377 -6σ | 1 C1.1 1    | 329154   | 329154   | Ankrd44                             | ankyrin repeat domain 44                                                           |
| TC0300003C | 0.015277 | -2.68289 | RHEB_cKO down vs WT | -1.42379 -6σ | 3 H2 3      | 26377    | 26377    | Dapp1                               | dual adaptor for phosphotyrosine and 3-phosphoinositides 1                         |
| TC03000024 | 0.128197 | -2.68502 | RHEB_cKO down vs WT | -1.42493 -6σ | 3 F1 3      | 68694    | 68694    | Lce1e                               | late cornified envelope 1E                                                         |
| TC0400003E | 0.0098   | -2.69633 | RHEB_cKO down vs WT | -1.431 -6σ   | ---         | ---      | ---      | Gm12736                             | predicted gene 12736                                                               |
| TC0200000E | 0.048306 | -2.69736 | RHEB_cKO down vs WT | -1.43155 -6σ | 2 B 2       | 108897   | 108897   | Aif1l                               | allograft inflammatory factor 1-like                                               |
| TC0800000E | 0.024334 | -2.69822 | RHEB_cKO down vs WT | -1.43201 -6σ | 8 8 B3.2    | 71306    | 71306    | Mfap3l                              | microfibrillar-associated protein 3-like                                           |
| TC0400003E | 0.0053   | -2.70302 | RHEB_cKO down vs WT | -1.43457 -6σ | 4 E1 4 72.1 | 18599    | 18599    | Padi1                               | peptidyl arginine deiminase, type I                                                |
| TC1800000E | 0.009608 | -2.7037  | RHEB_cKO down vs WT | -1.43493 -6σ | 18 B2 18    | 240215   | 240215   | Slc4a9                              | solute carrier family 4, sodium bicarbonate cotransporter, member 9                |
| TC07000034 | 0.059775 | -2.71214 | RHEB_cKO down vs WT | -1.43943 -6σ | ---         | ---      | ---      | Gm23233                             | predicted gene, 23233                                                              |
| TC0500000E | 1.27E-05 | -2.71625 | RHEB_cKO down vs WT | -1.44162 -6σ | 5 5 E4      | 231532   | 231532   | Arhgap24                            | Rho GTPase activating protein 24                                                   |
| TC0200001E | 0.016777 | -2.72224 | RHEB_cKO down vs WT | -1.44479 -6σ | 2 E5 2      | 96957    | 96957    | Tmem62                              | transmembrane protein 62                                                           |
| TC1500001E | 0.011302 | -2.72718 | RHEB_cKO down vs WT | -1.44741 -6σ | 15 E 15 3E  | 17939    | 17939    | Naga                                | N-acetyl galactosaminidase, alpha                                                  |
| TC1500001E | 0.010494 | -2.73701 | RHEB_cKO down vs WT | -1.4526 -6σ  | 15 E1 15    | 239559   | 239559   | A4galt                              | alpha 1,4-galactosyltransferase                                                    |
| TC1100000C | 0.018628 | -2.74095 | RHEB_cKO down vs WT | -1.45468 -6σ | 11 A1 11    | 237625   | 237625   | Pla2g3                              | phospholipase A2, group III                                                        |
| TC0300002E | 0.012785 | -2.74528 | RHEB_cKO down vs WT | -1.45695 -6σ | 3 F2.3 3    | 69206    | 69206    | 201001611                           | RIKEN cDNA 2010016118 gene                                                         |
| TC1200002E | 0.052173 | -2.75666 | RHEB_cKO down vs WT | -1.46292 -6σ | 12 E 12     | 71907    | 71907    | Serpina9                            | serine (or cysteine) peptidase inhibitor, clade A (alpha-1 antiproteinase, antitir |
| TC0400003E | 0.015269 | -2.77088 | RHEB_cKO down vs WT | -1.47035 -6σ | 4 4         | 77173    | 77173    | 8030443G:RIKEN cDNA 8030443G20 gene |                                                                                    |
| TC0900001E | 0.02943  | -2.77602 | RHEB_cKO down vs WT | -1.47302 -6σ | ---         | ---      | ---      | Gm26870                             | predicted gene, 26870                                                              |
| TC1100001E | 0.003727 | -2.77753 | RHEB_cKO down vs WT | -1.4738 -6σ  | ---         | ---      | ---      | Gm26888                             | predicted gene, 26888                                                              |
| TC05000027 | 0.001749 | -2.78056 | RHEB_cKO down vs WT | -1.47538 -6σ | 5 5 E3      | 67111    | 67111    | Naaa                                | N-acyl ethanolamine acid amidase                                                   |
| TC0700004E | 0.050403 | -2.78179 | RHEB_cKO down vs WT | -1.47601 -6σ | 7 F5 7      | 54123    | 54123    | Irf7                                | interferon regulatory factor 7                                                     |
| TC12000017 | 0.039326 | -2.78365 | RHEB_cKO down vs WT | -1.47698 -6σ | 12 C1 12    | 112407   | 112407   | Egln3                               | egl-9 family hypoxia-inducible factor 3                                            |
| TC02000024 | 0.076473 | -2.7852  | RHEB_cKO down vs WT | -1.47778 -6σ | 2 H1 2      | 545481   | 545481   | Arhgap40                            | Rho GTPase activating protein 40                                                   |
| TC0X000022 | 0.018632 | -2.79746 | RHEB_cKO down vs WT | -1.48412 -6σ | X X A4      | 70380    | 70380    | Mospd1                              | motile sperm domain containing 1                                                   |
| TC07000004 | 0.009414 | -2.80455 | RHEB_cKO down vs WT | -1.48777 -6σ | 7 A3 7      | 13107    | 13107    | Cyp2f2                              | cytochrome P450, family 2, subfamily f, polypeptide 2                              |
| TC10000002 | 0.01534  | -2.81232 | RHEB_cKO down vs WT | -1.49176 -6σ | 10 A4 10 1  | 52665    | 52665    | Echdc1                              | enoyl Coenzyme A hydratase domain containing 1                                     |
| TC0200004E | 0.001965 | -2.82078 | RHEB_cKO down vs WT | -1.49609 -6σ | 2 2 H2      | 59038    | 59038    | Pxmp4                               | peroxisomal membrane protein 4                                                     |
| TC1600001E | 0.077676 | -2.82799 | RHEB_cKO down vs WT | -1.49978 -6σ | 16 B4 16    | 207798   | 207798   | Gramd1c                             | GRAM domain containing 1C                                                          |
| TC0X00000E | 0.000785 | -2.82839 | RHEB_cKO down vs WT | -1.49998 -6σ | X C3 X 42.  | 15203    | 15203    | Heph                                | hephaestin                                                                         |
| TC0500000C | 0.004114 | -2.82845 | RHEB_cKO down vs WT | -1.50001 -6σ | 5 A2 5      | 108151   | 108151   | Sema3d                              | sema domain, immunoglobulin domain (Ig), short basic domain, secreted, (ser        |
| TC1000001E | 0.002271 | -2.84893 | RHEB_cKO down vs WT | -1.51042 -6σ | 10 A1 10    | 64009    | 64009    | Syne1                               | spectrin repeat containing, nuclear envelope 1                                     |
| TC0800001E | 0.097073 | -2.85413 | RHEB_cKO down vs WT | -1.51305 -6σ | 8 8 A3      | 75767    | 75767    | Rab11fip1                           | RAB11 family interacting protein 1 (class I)                                       |
| TC1500001E | 0.006327 | -2.85678 | RHEB_cKO down vs WT | -1.51439 -6σ | 15 D3 15    | 106068   | 106068   | Slc45a4                             | solute carrier family 45, member 4                                                 |
| TC1100003E | 0.023873 | -2.85732 | RHEB_cKO down vs WT | -1.51466 -6σ | 11 C 11 5C  | 20305    | 20305    | Ccl6                                | chemokine (C-C motif) ligand 6                                                     |

|            |          |          |                     |          |     |            |          |          |           |                                                                                    |
|------------|----------|----------|---------------------|----------|-----|------------|----------|----------|-----------|------------------------------------------------------------------------------------|
| TC06000012 | 0.019652 | -2.88287 | RHEB_cKO down vs WT | -1.52751 | -6σ | 6 E3 6 53. | 212541   | 212541   | Rho       | rhodopsin                                                                          |
| TC0400001C | 0.011496 | -2.88946 | RHEB_cKO down vs WT | -1.5308  | -6σ | 4 C6 4 47. | 13131    | 13131    | Dab1      | disabled 1                                                                         |
| TC0900001C | 0.028388 | -2.89241 | RHEB_cKO down vs WT | -1.53227 | -6σ | 9 E1 9 43. | 17920    | 17920    | Myo6      | myosin VI                                                                          |
| TC16000021 | 0.066462 | -2.90791 | RHEB_cKO down vs WT | -1.53998 | -6σ | ---        | ---      | ---      | 2310043M  | RIKEN cDNA 2310043M15 gene                                                         |
| TC17000003 | 0.340647 | -2.90864 | RHEB_cKO down vs WT | -1.54034 | -6σ | 17 A3.3 1. | 17229    | 17229    | Tpsb2     | tryptase beta 2                                                                    |
| TC03000024 | 0.094665 | -2.91922 | RHEB_cKO down vs WT | -1.54558 | -6σ | 3 F1 3     | 67718    | 67718    | Lce1h     | late cornified envelope 1H                                                         |
| TC13000002 | 0.022106 | -2.93163 | RHEB_cKO down vs WT | -1.5517  | -6σ | 13 A3.1 1. | 14756    | 14756    | Gpld1     | glycosylphosphatidylinositol specific phospholipase D1                             |
| TC01000004 | 0.047144 | -2.93777 | RHEB_cKO down vs WT | -1.55472 | -6σ | 1 c1 1 28. | 71872    | 71872    | Aox4      | aldehyde oxidase 4                                                                 |
| TC01000025 | 0.095078 | -2.95484 | RHEB_cKO down vs WT | -1.56308 | -6σ | 1 E2.1 1   | 20248    | 20248    | Serpnb3a  | serine (or cysteine) peptidase inhibitor, clade B (ovalbumin), member 3A           |
| TC1800001E | 0.051673 | -2.97274 | RHEB_cKO down vs WT | -1.5718  | -6σ | 18 E3 18   | 66255    | 66255    | Hsbp111   | heat shock factor binding protein 1-like 1                                         |
| TC17000014 | 0.004772 | -2.97279 | RHEB_cKO down vs WT | -1.57182 | -6σ | ---        | ---      | ---      | Gm8597    | predicted gene 8597                                                                |
| TC10000017 | 0.02658  | -2.97343 | RHEB_cKO down vs WT | -1.57213 | -6σ | 10 10 6.6  | 1.01E+08 | 1.01E+08 | Gm20125   | predicted gene, 20125                                                              |
| TC0300002E | 0.005068 | -2.97931 | RHEB_cKO down vs WT | -1.57498 | -6σ | 3 3 G3     | 99887    | 99887    | Tmem56    | transmembrane protein 56                                                           |
| TC0X00003E | 0.099853 | -2.98038 | RHEB_cKO down vs WT | -1.57549 | -6σ | X F5 X 77. | 54156    | 54156    | Egfl6     | EGF-like-domain, multiple 6                                                        |
| TC17000023 | 0.004587 | -2.98216 | RHEB_cKO down vs WT | -1.57636 | -6σ | 17 D 17    | 171168   | 171168   | Acer1     | alkaline ceramidase 1                                                              |
| TC05000025 | 0.002897 | -2.98539 | RHEB_cKO down vs WT | -1.57792 | -6σ | 5 C3.1 5   | 11980    | 11980    | Atp8a1    | ATPase, aminophospholipid transporter (APLT), class I, type 8A, member 1           |
| TC0300000E | 0.041905 | -2.99139 | RHEB_cKO down vs WT | -1.58081 | -6σ | ---        | 1.03E+08 | 1.03E+08 | Gm35439   | predicted gene, 35439                                                              |
| TC04000004 | 0.019779 | -2.99479 | RHEB_cKO down vs WT | -1.58246 | -6σ | 4 A5 4     | 230085   | 230085   | Phf24     | PHD finger protein 24                                                              |
| TC11000035 | 0.061768 | -2.99611 | RHEB_cKO down vs WT | -1.58309 | -6σ | 11 C 11    | 74617    | 74617    | Scep1     | serine carboxypeptidase 1                                                          |
| TC04000011 | 0.010744 | -2.99708 | RHEB_cKO down vs WT | -1.58356 | -6σ | 4 C7 4     | 230598   | 230598   | Nrd1      | nardilysin, N-arginine dibasic convertase, NRD convertase 1                        |
| TC15000001 | 0.049913 | -3.00334 | RHEB_cKO down vs WT | -1.58657 | -6σ | 15 B1 15   | 66270    | 66270    | Fam134b   | family with sequence similarity 134, member B                                      |
| TC15000007 | 0.025176 | -3.00364 | RHEB_cKO down vs WT | -1.58671 | -6σ | 15 15 E3   | 116939   | 116939   | Pnpla3    | patatin-like phospholipase domain containing 3                                     |
| TC06000023 | 0.032531 | -3.01202 | RHEB_cKO down vs WT | -1.59073 | -6σ | 6 6 27.2   | 110175   | 110175   | Ggct      | gamma-glutamyl cyclotransferase                                                    |
| TC04000011 | 0.002943 | -3.02033 | RHEB_cKO down vs WT | -1.59471 | -6σ | 4 D1 4     | 328505   | 328505   | Skint7    | selection and upkeep of intraepithelial T cells 7                                  |
| TC11000037 | 0.017783 | -3.02462 | RHEB_cKO down vs WT | -1.59676 | -6σ | 11 D 11    | 66708    | 66708    | Krtap3-2  | keratin associated protein 3-2                                                     |
| TC14000005 | 0.008485 | -3.02669 | RHEB_cKO down vs WT | -1.59774 | -6σ | 14 C1 14   | 54159    | 54159    | Rnase2b   | ribonuclease, RNase A family, 2B (liver, eosinophil-derived neurotoxin)            |
| TC0900001C | 0.043741 | -3.02804 | RHEB_cKO down vs WT | -1.59838 | -6σ | 9 D 9      | 235493   | 235493   | Fam214a   | family with sequence similarity 214, member A                                      |
| TC19000012 | 0.0025   | -3.03161 | RHEB_cKO down vs WT | -1.60008 | -6σ | 19 B 19    | 381217   | 381217   | Fam189a2  | family with sequence similarity 189, member A2                                     |
| TC1600001E | 0.016099 | -3.03311 | RHEB_cKO down vs WT | -1.6008  | -6σ | 16 B5 16   | 212998   | 212998   | BC016579  | cDNA sequence, BC016579                                                            |
| TC10000025 | 0.017533 | -3.03345 | RHEB_cKO down vs WT | -1.60096 | -6σ | 10 C1 10   | 216190   | 216190   | App12     | adaptor protein, phosphotyrosine interaction, PH domain and leucine zipper c       |
| TC11000004 | 0.028654 | -3.03497 | RHEB_cKO down vs WT | -1.60168 | -6σ | 11 A5 11   | 319767   | 319767   | Atp10b    | ATPase, class V, type 10B                                                          |
| TC04000034 | 0.021126 | -3.03712 | RHEB_cKO down vs WT | -1.6027  | -6σ | 4 D2.2 4   | 69780    | 69780    | Smap2     | small ArfGAP 2                                                                     |
| TC07000044 | 0.005174 | -3.04309 | RHEB_cKO down vs WT | -1.60554 | -6σ | 7 7 F5     | 12176    | 12176    | Snip3     | BCL2/adenovirus E1B interacting protein 3                                          |
| TC05000003 | 0.055863 | -3.04924 | RHEB_cKO down vs WT | -1.60845 | -6σ | 5 B1 5     | 665270   | 665270   | Plb1      | phospholipase B1                                                                   |
| TC0100001C | 0.077676 | -3.0706  | RHEB_cKO down vs WT | -1.61852 | -6σ | 1 1 D      | 116872   | 116872   | Serpnb7   | serine (or cysteine) peptidase inhibitor, clade B, member 7                        |
| TC12000014 | 0.045867 | -3.07444 | RHEB_cKO down vs WT | -1.62032 | -6σ | 12 12 A3   | 68775    | 68775    | Atp6v1c2  | ATPase, H+ transporting, lysosomal V1 subunit C2                                   |
| TC17000021 | 0.039971 | -3.08456 | RHEB_cKO down vs WT | -1.62507 | -6σ | 17 B3 17   | 78249    | 78249    | Adgrf4    | adhesion G protein-coupled receptor F4                                             |
| TC13000001 | 0.043518 | -3.08579 | RHEB_cKO down vs WT | -1.62564 | -6σ | ---        | ---      | ---      | Gm11295   | predicted gene 11295                                                               |
| TC04000021 | 0.003315 | -3.09478 | RHEB_cKO down vs WT | -1.62984 | -6σ | 4 A1 4     | 242285   | 242285   | Sdr16c5   | short chain dehydrogenase/reductase family 16C, member 5                           |
| TC04000032 | 0.002584 | -3.09788 | RHEB_cKO down vs WT | -1.63128 | -6σ | 4 D1 4     | 242627   | 242627   | Skint5    | selection and upkeep of intraepithelial T cells 5                                  |
| TC03000024 | 0.086813 | -3.0983  | RHEB_cKO down vs WT | -1.63148 | -6σ | 3 F2 3     | 66203    | 66203    | Lce1m     | late cornified envelope 1M                                                         |
| TC11000012 | 0.003746 | -3.1     | RHEB_cKO down vs WT | -1.63227 | -6σ | ---        | ---      | ---      | Gm11433   | predicted gene 11433                                                               |
| TC0X00002E | 0.118286 | -3.11986 | RHEB_cKO down vs WT | -1.64148 | -6σ | X E3 X     | 331524   | 331524   | Xkrx      | X-linked Kx blood group related, X-linked                                          |
| TC0100003E | 0.003637 | -3.12612 | RHEB_cKO down vs WT | -1.64437 | -6σ | 1 B 1      | 78321    | 78321    | Ankrd23   | ankyrin repeat domain 23                                                           |
| TC1100000C | 0.061186 | -3.14001 | RHEB_cKO down vs WT | -1.65077 | -6σ | 11 A1 11   | 75219    | 75219    | Dusp18    | dual specificity phosphatase 18                                                    |
| TC1300000C | 0.009981 | -3.17431 | RHEB_cKO down vs WT | -1.66644 | -6σ | 13 A1 13   | 17101    | 17101    | Lyst      | lysosomal trafficking regulator                                                    |
| TC02000042 | 0.020565 | -3.21598 | RHEB_cKO down vs WT | -1.68526 | -6σ | 2 E3 2 54. | 12359    | 12359    | Cat       | catalase                                                                           |
| TC09000015 | 0.018413 | -3.21774 | RHEB_cKO down vs WT | -1.68605 | -6σ | 9 F3 9     | 73748    | 73748    | Gad11     | glutamate decarboxylase-like 1                                                     |
| TC13000024 | 0.020443 | -3.23537 | RHEB_cKO down vs WT | -1.69393 | -6σ | ---        | 1.03E+08 | 1.03E+08 | Gm32089   | predicted gene, 32089                                                              |
| TC1100001E | 0.005254 | -3.25924 | RHEB_cKO down vs WT | -1.70454 | -6σ | 11 E2 11   | 69602    | 69602    | Otop3     | otopettrin 3                                                                       |
| TC0X000027 | 0.110937 | -3.26358 | RHEB_cKO down vs WT | -1.70645 | -6σ | X X C2     | 57385    | 57385    | P2ry4     | pyrimidinergic receptor P2Y, G-protein coupled, 4                                  |
| TC05000004 | 0.047562 | -3.26421 | RHEB_cKO down vs WT | -1.70674 | -6σ | 5 B3 5     | 76943    | 76943    | Psap1     | prosaposin-like 1                                                                  |
| TC04000001 | 0.045243 | -3.26937 | RHEB_cKO down vs WT | -1.70901 | -6σ | 4 A3 4     | 14590    | 14590    | Ggh       | gamma-glutamyl hydrolase                                                           |
| TC03000014 | 0.015824 | -3.27731 | RHEB_cKO down vs WT | -1.71251 | -6σ | ---        | ---      | ---      | Adh6b     | alcohol dehydrogenase 6B (class V)                                                 |
| TC13000024 | 0.007206 | -3.29474 | RHEB_cKO down vs WT | -1.72017 | -6σ | 13 D1 13   | 15212    | 15212    | Hexb      | hexosaminidase B                                                                   |
| TC0700003E | 0.008972 | -3.30219 | RHEB_cKO down vs WT | -1.72342 | -6σ | 7 D3 7     | 65098    | 65098    | Zfand6    | zinc finger, AN1-type domain 6                                                     |
| TC15000017 | 0.122902 | -3.30657 | RHEB_cKO down vs WT | -1.72533 | -6σ | 15 D3 15   | 57277    | 57277    | Slurp1    | secreted Ly6/Plaur domain containing 1                                             |
| TC14000021 | 0.008075 | -3.30877 | RHEB_cKO down vs WT | -1.72629 | -6σ | 14 C3 14   | 68631    | 68631    | Cryl1     | crystallin, lambda 1                                                               |
| TC09000032 | 0.004505 | -3.31859 | RHEB_cKO down vs WT | -1.73057 | -6σ | ---        | ---      | ---      | Gm26797   | predicted gene, 26797                                                              |
| TC0200004E | 0.003884 | -3.33254 | RHEB_cKO down vs WT | -1.73662 | -6σ | 2 F3 2     | 74182    | 74182    | Gpcpd1    | glycerophosphocholine phosphodiesterase 1                                          |
| TC11000001 | 0.020193 | -3.33523 | RHEB_cKO down vs WT | -1.73779 | -6σ | 11 A1 11   | 626870   | 626870   | Gm11992   | predicted gene 11992                                                               |
| TC11000003 | 0.045612 | -3.35112 | RHEB_cKO down vs WT | -1.74464 | -6σ | 11 A4 11   | 20868    | 20868    | Stk10     | serine/threonine kinase 10                                                         |
| TC12000022 | 0.049123 | -3.35679 | RHEB_cKO down vs WT | -1.74708 | -6σ | 12 12 F1   | 94040    | 94040    | Clmn      | calmin                                                                             |
| TC06000023 | 0.019643 | -3.37954 | RHEB_cKO down vs WT | -1.75683 | -6σ | 6 B3 6     | 107569   | 107569   | Nt5c3     | 5'-nucleotidase, cytosolic III                                                     |
| TC12000002 | 0.016064 | -3.41452 | RHEB_cKO down vs WT | -1.77168 | -6σ | 12 A1.3 1. | 67216    | 67216    | Mboat2    | membrane bound O-acyltransferase domain containing 2                               |
| TSUnmappe  | 0.020697 | -3.42105 | RHEB_cKO down vs WT | -1.77444 | -6σ | ---        | 74478    | 74478    | Snx29     | sorting nexin 29                                                                   |
| TC16000013 | 0.08777  | -3.44002 | RHEB_cKO down vs WT | -1.78242 | -6σ | 16 B1 16   | 625123   | 625123   | Gm6557    | predicted gene 6557                                                                |
| TC06000003 | 0.0026   | -3.44459 | RHEB_cKO down vs WT | -1.78433 | -6σ | 6 B1 6     | 208665   | 208665   | Akr1d1    | aldo-keto reductase family 1, member D1                                            |
| TC02000024 | 0.003246 | -3.44931 | RHEB_cKO down vs WT | -1.78631 | -6σ | 2 H1 2     | 71878    | 71878    | Fam83d    | family with sequence similarity 83, member D                                       |
| TC02000017 | 0.075035 | -3.45878 | RHEB_cKO down vs WT | -1.79026 | -6σ | 2 E5 2     | 623781   | 623781   | Gm14137   | predicted gene 14137                                                               |
| TC04000035 | 0.002778 | -3.46712 | RHEB_cKO down vs WT | -1.79374 | -6σ | 4 D2.2 4 6 | 14622    | 14622    | Gjb5      | gap junction protein, beta 5                                                       |
| TC14000027 | 0.026058 | -3.48365 | RHEB_cKO down vs WT | -1.8006  | -6σ | 14 C2 14   | 214922   | 214922   | Slc39a2   | solute carrier family 39 (zinc transporter), member 2                              |
| TC13000023 | 0.01683  | -3.48685 | RHEB_cKO down vs WT | -1.80192 | -6σ | 13 C1 13   | 74338    | 74338    | Slc6a19   | solute carrier family 6 (neurotransmitter transporter), member 19                  |
| TC15000001 | 0.00297  | -3.48808 | RHEB_cKO down vs WT | -1.80243 | -6σ | 15 B1 15   | 11732    | 11732    | Ank       | progressive ankylosis                                                              |
| TC03000023 | 0.017354 | -3.50069 | RHEB_cKO down vs WT | -1.80764 | -6σ | 3 F1 3     | 545541   | 545541   | Gm5849    | predicted gene 5849                                                                |
| TC0900000C | 0.01335  | -3.50602 | RHEB_cKO down vs WT | -1.80984 | -6σ | 9 A1 9 2.4 | 12362    | 12362    | Casp1     | caspase 1                                                                          |
| TC0X000023 | 0.03236  | -3.51034 | RHEB_cKO down vs WT | -1.81161 | -6σ | X X        | 74305    | 74305    | 1700111N  | RIKEN cDNA 1700111N16 gene                                                         |
| TC17000012 | 0.029869 | -3.51148 | RHEB_cKO down vs WT | -1.81208 | -6σ | 17 E4 17   | 13819    | 13819    | Epas1     | endothelial PAS domain protein 1                                                   |
| TC03000024 | 0.014121 | -3.53484 | RHEB_cKO down vs WT | -1.82165 | -6σ | 3 F2.1 3 4 | 13601    | 13601    | Ecm1      | extracellular matrix protein 1                                                     |
| TC03000017 | 0.442133 | -3.57185 | RHEB_cKO down vs WT | -1.83667 | -6σ | 3 A2 3 6.2 | 12873    | 12873    | Cpa3      | carboxypeptidase A3, mast cell                                                     |
| TC12000022 | 0.056683 | -3.59153 | RHEB_cKO down vs WT | -1.8446  | -6σ | 12 12 F1   | 68054    | 68054    | Serpina12 | serine (or cysteine) peptidase inhibitor, clade A (alpha-1 antiproteinase, antitri |
| TC05000037 | 0.005037 | -3.62522 | RHEB_cKO down vs WT | -1.85807 | -6σ | 5 G2 5     | 330217   | 330217   | Gal3st4   | galactose-3-O-sulfotransferase 4                                                   |
| TC19000004 | 0.111567 | -3.71028 | RHEB_cKO down vs WT | -1.89153 | -6σ | 19 C1 19   | 240633   | 240633   | Lipk      | lipase, family member K                                                            |
| TC0500002E | 0.053328 | -3.75755 | RHEB_cKO down vs WT | -1.90979 | -6σ | 5 E4 5     | 15442    | 15442    | Hpse      | heparanase                                                                         |
| TC10000015 | 0.012811 | -3.77144 | RHEB_cKO down vs WT | -1.91512 | -6σ | 10 D3 10   | 407790   | 407790   | Ndufa4l2  | NADH dehydrogenase (ubiquinone) 1 alpha subcomplex, 4-like 2                       |
| TC13000005 | 0.355309 | -3.80585 | RHEB_cKO down vs WT | -1.92822 | -6σ | 13 A5 13   | 18295    | 18295    | Ogn       | osteoglycin                                                                        |
| TC11000022 | 0.029143 | -3.80739 | RHEB_cKO down vs WT | -1.9288  | -6σ | 11 A1 11   | 12808    | 12808    | Cobl      | cordon-bleu WH2 repeat                                                             |
| TC0900002C | 0.02788  | -3.83179 | RHEB_cKO down vs WT | -1.93802 | -6σ | 9 9 B      | 56857    | 56857    | Slc37a2   | solute carrier family 37 (glycerol-3-phosphate transporter), member 2              |
| TC11000037 | 0.085427 | -3.85339 | RHEB_cKO down vs WT | -1.94613 | -6σ | 11 D 11    | 94179    | 94179    | Krt23     | keratin 23                                                                         |



|            |          |          |                     |          |       |             |          |          |           |                                                                              |
|------------|----------|----------|---------------------|----------|-------|-------------|----------|----------|-----------|------------------------------------------------------------------------------|
| TC03000024 | 0.054365 | -3.87193 | RHEB_cKO down vs WT | -1.95305 | -6σ   | 3 3 F2      | 71790    | 71790    | Anxa9     | annexin A9                                                                   |
| TC07000004 | 0.07897  | -3.88793 | RHEB_cKO down vs WT | -1.959   | -6σ   | 7 A3 7 15.  | 13090    | 13090    | Cyp2b19   | cytochrome P450, family 2, subfamily b, polypeptide 19                       |
| TC11000024 | 0.000592 | -3.96062 | RHEB_cKO down vs WT | -1.98573 | -6σ   | 11 A4 11    | 216643   | 216643   | Gabrp     | gamma-aminobutyric acid (GABA) A receptor, pi                                |
| TC17000003 | 0.006454 | -3.96094 | RHEB_cKO down vs WT | -1.98584 | -6σ   | 17 A3.3 17  | 27410    | 27410    | Abca3     | ATP-binding cassette, sub-family A (ABC1), member 3                          |
| TC07000025 | 0.026853 | -3.96217 | RHEB_cKO down vs WT | -1.98629 | -6σ   | 7 B4 7 29.  | 50722    | 50722    | Dkk1      | dickkopf-like 1                                                              |
| TC12000010 | 0.030656 | -4.00325 | RHEB_cKO down vs WT | -2.00117 | -6σ   | 12 E 12 51  | 12652    | 12652    | Chga      | chromogranin A                                                               |
| TC08000011 | 0.083968 | -4.01199 | RHEB_cKO down vs WT | -2.00432 | -6σ   | 8 D3 8      | 71903    | 71903    | Ces2f     | carboxylesterase 2F                                                          |
| TC04000032 | 0.012381 | -4.04952 | RHEB_cKO down vs WT | -2.01775 | -6σ   | 4 D1 4      | 230613   | 230613   | Skint10   | selection and upkeep of intraepithelial T cells 10                           |
| TC0X000005 | 0.011144 | -4.15559 | RHEB_cKO down vs WT | -2.05505 | -6σ   | X C3 X      | 245533   | 245533   | Awat1     | acyl-CoA wax alcohol acyltransferase 1                                       |
| TC09000030 | 0.006445 | -4.19241 | RHEB_cKO down vs WT | -2.06778 | ≤ -6σ | 9 F1 9 58.1 | 76257    | 76257    | Slc38a3   | solute carrier family 38, member 3                                           |
| TC08000005 | 0.019544 | -4.29258 | RHEB_cKO down vs WT | -2.10185 | ≤ -6σ | 8 8 C3      | 71310    | 71310    | Tbc1d9    | TBC1 domain family, member 9                                                 |
| TC04000032 | 0.004665 | -4.48222 | RHEB_cKO down vs WT | -2.16421 | ≤ -6σ | 4 D1 4      | 230622   | 230622   | Skint6    | selection and upkeep of intraepithelial T cells 6                            |
| TC02000045 | 0.076472 | -4.50337 | RHEB_cKO down vs WT | -2.17101 | ≤ -6σ | 2 F 2 62.9  | 16175    | 16175    | Il1a      | interleukin 1 alpha                                                          |
| TC11000007 | 0.014782 | -4.51402 | RHEB_cKO down vs WT | -2.17441 | ≤ -6σ | 11 B2 11 5  | 16515    | 16515    | Kcnj12    | potassium inwardly-rectifying channel, subfamily J, member 12                |
| TC04000011 | 0.014375 | -4.55217 | RHEB_cKO down vs WT | -2.18655 | ≤ -6σ | 4 D1 4      | 329919   | 329919   | Skint2    | selection and upkeep of intraepithelial T cells 2                            |
| TC10000024 | 0.021549 | -4.60782 | RHEB_cKO down vs WT | -2.20408 | ≤ -6σ | 10 C1 10    | 12365    | 12365    | Casp14    | caspase 14                                                                   |
| TC12000002 | 0.004303 | -4.63035 | RHEB_cKO down vs WT | -2.21112 | ≤ -6σ | ---         | 407816   | 407816   | BC023202  | cDNA sequence BC023202                                                       |
| TC11000040 | 0.035428 | -4.70469 | RHEB_cKO down vs WT | -2.2341  | ≤ -6σ | 11 E1 11    | 217265   | 217265   | Abca5     | ATP-binding cassette, sub-family A (ABC1), member 5                          |
| TC03000008 | 0.0202   | -4.72121 | RHEB_cKO down vs WT | -2.23916 | ≤ -6σ | 3 F1 3      | 1E+08    | 1E+08    | Sprr2a3   | small proline-rich protein 2A3                                               |
| TC08000001 | 0.021832 | -4.73975 | RHEB_cKO down vs WT | -2.24481 | ≤ -6σ | 8 A3 8 10.  | 52123    | 52123    | Agpat5    | 1-acylglycerol-3-phosphate O-acyltransferase 5 (lysophosphatidic acid acyltr |
| TC08000030 | 0.014767 | -4.91304 | RHEB_cKO down vs WT | -2.29662 | ≤ -6σ | 8 E1 8      | 74032    | 74032    | Sdr42e1   | short chain dehydrogenase/reductase family 42E, member 1                     |
| TC05000005 | 0.045286 | -5.04732 | RHEB_cKO down vs WT | -2.33552 | ≤ -6σ | 5 C1 5 28.  | 20531    | 20531    | Slc34a2   | solute carrier family 34 (sodium phosphate), member 2                        |
| TC10000023 | 0.085121 | -5.05488 | RHEB_cKO down vs WT | -2.33768 | ≤ -6σ | 10 10 B5.5  | 71733    | 71733    | Susd2     | sushi domain containing 2                                                    |
| TC06000015 | 0.00067  | -5.08151 | RHEB_cKO down vs WT | -2.34526 | ≤ -6σ | 6 F3 6      | 70809    | 70809    | Clec2g    | C-type lectin domain family 2, member g                                      |
| TC04000005 | 0.013863 | -5.11751 | RHEB_cKO down vs WT | -2.35544 | ≤ -6σ | ---         | ---      | ---      | Gm12436   | predicted gene 12436                                                         |
| TC04000035 | 0.021081 | -5.21732 | RHEB_cKO down vs WT | -2.38331 | ≤ -6σ | 4 E1 4      | 329993   | 329993   | Gm438     | predicted gene 438                                                           |
| TC14000020 | 0.014236 | -5.22352 | RHEB_cKO down vs WT | -2.38502 | ≤ -6σ | 14 B-C1 14  | 19752    | 19752    | Rnase1    | ribonuclease, RNase A family, 1 (pancreatic)                                 |
| TC16000014 | 0.00925  | -5.24403 | RHEB_cKO down vs WT | -2.39068 | ≤ -6σ | 16 B2 16    | 224079   | 224079   | Atp13a4   | ATPase type 13A4                                                             |
| TC07000004 | 0.005024 | -5.25908 | RHEB_cKO down vs WT | -2.39481 | ≤ -6σ | 7 A3 7      | 13108    | 13108    | Cyp2g1    | cytochrome P450, family 2, subfamily g, polypeptide 1                        |
| TC04000011 | 0.009431 | -5.27255 | RHEB_cKO down vs WT | -2.3985  | ≤ -6σ | 4 D1 4      | 195564   | 195564   | Skint3    | selection and upkeep of intraepithelial T cells 3                            |
| TC02000016 | 0.000625 | -5.28608 | RHEB_cKO down vs WT | -2.4022  | ≤ -6σ | 2 E3 2      | 269328   | 269328   | Muc15     | mucin 15                                                                     |
| TC17000014 | 0.005265 | -5.29328 | RHEB_cKO down vs WT | -2.40416 | ≤ -6σ | 17 A1 17 8  | 381058   | 381058   | Unc93a    | unc-93 homolog A (C. elegans)                                                |
| TC06000010 | 0.011056 | -5.32506 | RHEB_cKO down vs WT | -2.4128  | ≤ -6σ | 6 D1 6      | 243535   | 243535   | BC048671  | cDNA sequence BC048671                                                       |
| TC18000012 | 0.048071 | -5.54078 | RHEB_cKO down vs WT | -2.47009 | ≤ -6σ | 18 B3 18    | 225443   | 225443   | Gm94      | predicted gene 94                                                            |
| TC04000040 | 0.001256 | -5.57402 | RHEB_cKO down vs WT | -2.47872 | ≤ -6σ | 4 E2 4      | 12353    | 12353    | Car6      | carbonic anhydrase 6                                                         |
| TC10000011 | 0.025598 | -5.58734 | RHEB_cKO down vs WT | -2.48216 | ≤ -6σ | 10 C2-D1    | 15109    | 15109    | Hal       | histidine ammonia lyase                                                      |
| TC13000004 | 0.007846 | -5.62003 | RHEB_cKO down vs WT | -2.49058 | ≤ -6σ | 13 13 14.5  | 1.01E+08 | 1.01E+08 | Gm19865   | predicted gene, 19865                                                        |
| TC07000040 | 0.023221 | -5.79831 | RHEB_cKO down vs WT | -2.53563 | ≤ -6σ | 7 E3 7      | 244202   | 244202   | Nlrp10    | NLR family, pyrin domain containing 10                                       |
| TC07000034 | 0.028944 | -5.83652 | RHEB_cKO down vs WT | -2.54511 | ≤ -6σ | 7 C 7       | 67867    | 67867    | Lrrc28    | leucine rich repeat containing 28                                            |
| TC01000034 | 0.032147 | -5.85961 | RHEB_cKO down vs WT | -2.5508  | ≤ -6σ | 1 1 H1      | 55990    | 55990    | Fmo2      | flavin containing monooxygenase 2                                            |
| TC11000012 | 0.015846 | -5.91921 | RHEB_cKO down vs WT | -2.5654  | ≤ -6σ | 11 C 11     | 66107    | 66107    | Wfdc21    | WAP four-disulfide core domain 21                                            |
| TC03000008 | 0.03535  | -5.96672 | RHEB_cKO down vs WT | -2.57694 | ≤ -6σ | 3 3 F2      | 66198    | 66198    | Them5     | thioesterase superfamily member 5                                            |
| TC14000004 | 0.007535 | -6.09067 | RHEB_cKO down vs WT | -2.6066  | ≤ -6σ | ---         | ---      | ---      | Gm16439   | predicted pseudogene 16439                                                   |
| TC06000017 | 0.031542 | -6.16782 | RHEB_cKO down vs WT | -2.62476 | ≤ -6σ | 6 G3 6      | 330450   | 330450   | Far2      | fatty acyl CoA reductase 2                                                   |
| TC08000013 | 0.000847 | -6.31305 | RHEB_cKO down vs WT | -2.65834 | ≤ -6σ | 8 E1 8      | 209239   | 209239   | Gan       | giant axonal neuropathy                                                      |
| TC02000006 | 0.011905 | -6.52146 | RHEB_cKO down vs WT | -2.7052  | ≤ -6σ | ---         | ---      | ---      | Gm13536   | predicted gene 13536                                                         |
| TC02000043 | 0.000821 | -6.53526 | RHEB_cKO down vs WT | -2.70825 | ≤ -6σ | 2 E3 2      | 170442   | 170442   | Bbox1     | butyrobetaine (gamma), 2-oxoglutarate dioxygenase 1 (gamma-butyrobetaine     |
| TC03000014 | 0.006757 | -6.63564 | RHEB_cKO down vs WT | -2.73024 | ≤ -6σ | 3 G3 3 64.  | 11522    | 11522    | Adh1      | alcohol dehydrogenase 1 (class I)                                            |
| TC05000013 | 0.000276 | -7.14073 | RHEB_cKO down vs WT | -2.83607 | ≤ -6σ | 5 F 5 60.6  | 243262   | 243262   | Oas1f     | 2'-5' oligoadenylate synthetase 1F                                           |
| TC08000013 | 0.000949 | -7.1534  | RHEB_cKO down vs WT | -2.83863 | ≤ -6σ | ---         | ---      | ---      | Gm20204   | predicted gene, 20204                                                        |
| TC01000038 | 0.01914  | -7.26425 | RHEB_cKO down vs WT | -2.86081 | ≤ -6σ | 1 1 E1-E2   | 381286   | 381286   | Serpnb3c  | serine (or cysteine) peptidase inhibitor, clade B, member 3C                 |
| TC15000017 | 0.027046 | -7.41249 | RHEB_cKO down vs WT | -2.88996 | ≤ -6σ | 15 D3 15    | 69462    | 69462    | 2300005B( | RIKEN cDNA 2300005B03 gene                                                   |
| TC11000006 | 0.016477 | -8.08311 | RHEB_cKO down vs WT | -3.01491 | ≤ -6σ | 11 B1.3 11  | 73988    | 73988    | 4930438A( | RIKEN cDNA 4930438A08 gene                                                   |
| TC01000032 | 0.002413 | -8.13554 | RHEB_cKO down vs WT | -3.02424 | ≤ -6σ | 1 1 G2      | 74091    | 74091    | Npl       | N-acetylneuraminatase pyruvate lyase                                         |
| TC02000008 | 0.006117 | -8.15908 | RHEB_cKO down vs WT | -3.02841 | ≤ -6σ | 2 2 C3      | 76747    | 76747    | Dapl1     | death associated protein-like 1                                              |
| TC08000014 | 0.006037 | -8.53742 | RHEB_cKO down vs WT | -3.0938  | ≤ -6σ | 8 E1 8      | 15486    | 15486    | Hsd17b2   | hydroxysteroid (17-beta) dehydrogenase 2                                     |
| TC17000014 | 0.004599 | -9.00995 | RHEB_cKO down vs WT | -3.17152 | ≤ -6σ | 17 A1 17    | 667055   | 667055   | Gm9992    | predicted gene 9992                                                          |
| TC05000027 | 0.0064   | -10.6801 | RHEB_cKO down vs WT | -3.41685 | ≤ -6σ | 5 E2 5 44.  | 12223    | 12223    | Btc       | betacellulin, epidermal growth factor family member                          |
| TC04000027 | 0.008304 | -11.5792 | RHEB_cKO down vs WT | -3.53347 | ≤ -6σ | 4 B3 4 32.  | 30936    | 30936    | Slc46a2   | solute carrier family 46, member 2                                           |
| TC04000032 | 0.003223 | -15.398  | RHEB_cKO down vs WT | -3.94468 | ≤ -6σ | 4 D1 4      | 329918   | 329918   | Skint9    | selection and upkeep of intraepithelial T cells 9                            |
